# Supplementary material for: Interdependence of plasma membrane nanoscale dynamics of a kinase and its cognate substrate underlies Arabidopsis response to viral infection
Source: eLife journal article supplement (doi:10.7554/elife.90309), 2023-09-14
Supplement: fig5-figsupp1-data2 [file elife-90309-fig5-figsupp1-data2-v1.zip]

| Col-0 | <i>rem1.2 rem1.3</i><br><i>rem1.4 cpk3</i><br>#1 | <i>rem1.2 rem1.3</i><br><i>rem1.4 cpk3</i><br>#2 |
|-------|--------------------------------------------------|--------------------------------------------------|
|-------|--------------------------------------------------|--------------------------------------------------|

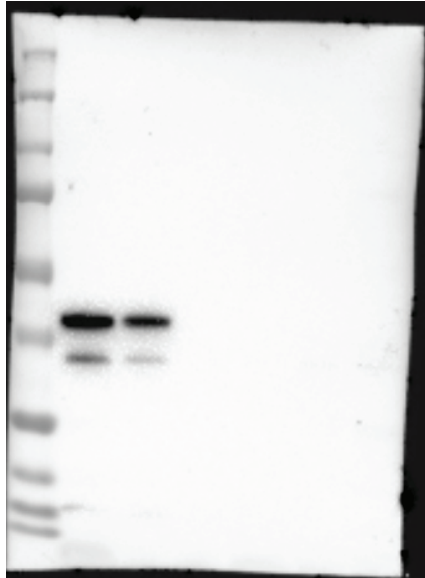

— REM1.2  
— REM1.3

| Col-0 | <i>rem1.2 rem1.3</i><br><i>rem1.4 cpk3</i><br>#1 | <i>rem1.2 rem1.3</i><br><i>rem1.4 cpk3</i><br>#2 |
|-------|--------------------------------------------------|--------------------------------------------------|
|-------|--------------------------------------------------|--------------------------------------------------|

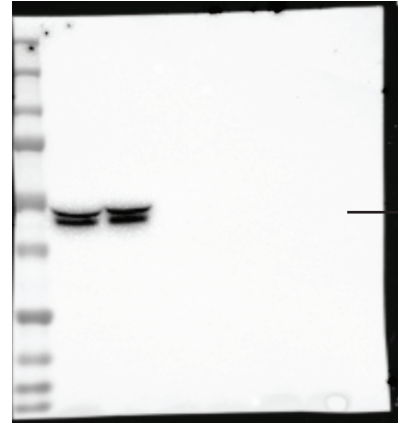

— CPK3

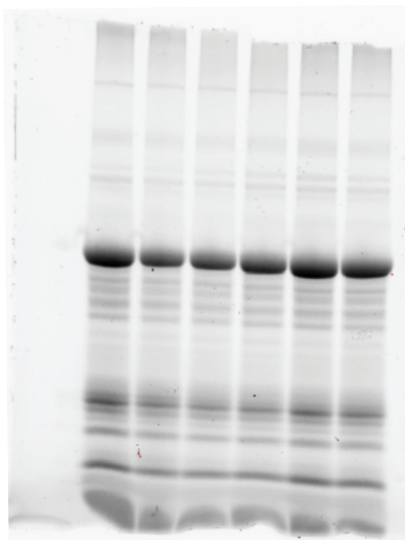

Stain free gel

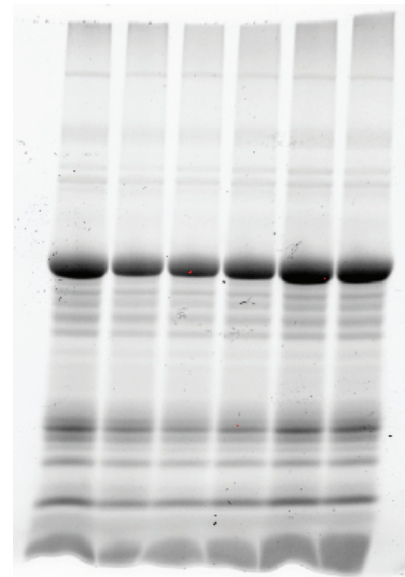

Stain free gel
