# Supplementary material for: Interdependence of plasma membrane nanoscale dynamics of a kinase and its cognate substrate underlies Arabidopsis response to viral infection
Source: eLife. 2025 May 2;12:RP90309. doi: 10.7554/eLife.90309 (PMC12048157; doi:10.7554/eLife.90309)
Supplement: Figure 1—source data 3. [file elife-90309-fig1-data3.xlsx]

## Sheet: Feuil1
Foci area (% of Col-0 mean)							Statistical analysis
Col-0	cpk1/2	cpk5/6	cpk1/2/5/6	cpk5/6/11	cpk3/5/6/11		ANOVA summary
70.8931	164.197	52.9902	101.063	50.616	118.057		F	5.245
27.453	58.4389	48.5099	102.187	65.6874	97.1308		P value	<0,0001
83.829	87.9203	218.605	224.142	49.5596	77.6137		P value summary	****
47.623	85.9584	83.2315	118.071	84.0243	21.9816		Significant diff. among means (P < 0.05)?	Yes
94.2777	113.218	81.8434	78.3234	142.166	153.338		R squared	0.02241
234.825	148.731	228.853	158.558	83.1438	80.4075
230.648	30.4616	36.4887	128.005	97.4544	23.2675		Brown-Forsythe test
77.6453	67.5295	32.2797	61.1617	89.9464	99.9609		F (DFn, DFd)	1,118 (5, 1144)
14.2202	89.1667	117.039	142.574	23.4487	102.545		P value	0.349
125.73	62.6569	231.698	155.696	45.0124	180.901		P value summary	ns
170.663	67.5655	82.4422	55.6488	30.1117	97.4737		Are SDs significantly different (P < 0.05)?	No
51.543	135.137	104.083	32.5169	76.6216	162.854
69.8874	21.101	82.8642	39.6294	78.7995	77.2831		Bartlett's test
56.8166	57.3116	61.3664	36.4472	47.1857	96.9776		Bartlett's statistic (corrected)	2.929
187.556	95.9392	200.255	28.8509	232.504	57.3169		P value	0.7109
68.979	59.824	24.6082	30.7057	147.96	172.804		P value summary	ns
129.682	127.21	49.0228	31.0798	44.5012	108.858		Are SDs significantly different (P < 0.05)?	No
87.6259	92.8873	44.2119	35.9845	68.5637	82.0562
137.939	122.434	142.821	42.6857	48.399	43.0057		ANOVA table	SS	DF	MS	F (DFn, DFd)	P value
92.3191	61.8721	74.9206	27.1914	103.743	90.6066		Treatment (between columns)	79277	5	15855	F (5, 1144) = 5,245	P<0,0001
222.283	150.33	210.806	57.0367	15.7294	161.14		Residual (within columns)	3458517	1144	3023
146.814	218.303	86.8783	61.5848	72.8688	101.13		Total	3537794	1149
83.4566	217.432	89.4447	16.0469	45.4455	155.017
106.205	114.656	80.5531	105.616	96.3185	243.425		Data summary
75.9664	110.051	213.305	45.595	195.065	115.018		Number of treatments (columns)	6
90.0818	49.8095	65.9394	223.796	23.5497	41.8817		Number of values (total)	1150
38.8912	95.3936	114.287	219.431	41.1621	219.791
115.651	34.9162	52.369	159.269	52.4701	133.208
129.562	152.813	129.941	150.92	137.802	101.4		Number of families	1
75.0093	99.9	217.868	85.7306	83.3344	136.031		Number of comparisons per family	15
61.101	120.296	68.5232	66.9989	239.303	27.2502		Alpha	0.05
98.6513	71.9677	175.113	72.3177	155.636	38.1596
60.7596	50.667	71.7929	81.4637	133.691	44.1501		Tukey's multiple comparisons test	Mean Diff,	95,00% CI of diff,	Below threshold?	Summary	Adjusted P Value
78.5347	31.6475	104.551	203.241	122.534	13.0863		Col-0 vs. cpk1/2	0.6287	-17,12 to 18,38	No	ns	>0,9999
65.2748	48.6491	43.1575	154.54	210.993	101.418		Col-0 vs. cpk5/6	9.888	-5,992 to 25,77	No	ns	0.4808
66.5116	39.7862	78.8227	181.329	104.714	117.535		Col-0 vs. cpk1/2/5/6	3.131	-12,13 to 18,39	No	ns	0.992
129.43	216.52	34.322	40.5558	139.636	181.453		Col-0 vs. cpk5/6/11	2.82	-15,10 to 20,74	No	ns	0.9977
89.4146	105.302	112.549	74.9327	45.6112	210.41		Col-0 vs. cpk3/5/6/11	-17.69	-30,44 to -4,928	Yes	**	0.0011
163.14	108.369	39.4764	51.9201	71.4007	113.537		cpk1/2 vs. cpk5/6	9.26	-12,35 to 30,87	No	ns	0.8255
97.9852	248.49	49.0751	90.5966	173.328	52.0314		cpk1/2 vs. cpk1/2/5/6	2.502	-18,65 to 23,65	No	ns	0.9994
54.402	136.051	89.7271	93.9108	194.691	125.213		cpk1/2 vs. cpk5/6/11	2.191	-20,95 to 25,33	No	ns	0.9998
157.781	88.9533	68.9637	56.1892	164.193	248.308		cpk1/2 vs. cpk3/5/6/11	-18.31	-37,74 to 1,112	No	ns	0.0777
49.0014	167.953	182.748	30.8163	158.911	67.7408		cpk5/6 vs. cpk1/2/5/6	-6.757	-26,36 to 12,85	No	ns	0.9231
66.3048	81.5709	197.302	30.0855	152.108	87.411		cpk5/6 vs. cpk5/6/11	-7.069	-28,81 to 14,67	No	ns	0.9393
86.0203	79.9112	50.3655	26.2325	156.695	131.274		cpk5/6 vs. cpk3/5/6/11	-27.57	-45,31 to -9,843	Yes	***	0.0001
90.6696	129.997	48.6998	25.9979	88.0597	134.854		cpk1/2/5/6 vs. cpk5/6/11	-0.3114	-21,60 to 20,98	No	ns	>0,9999
99.0209	31.9742	234.935	69.3748	19.1814	157.904		cpk1/2/5/6 vs. cpk3/5/6/11	-20.82	-37,99 to -3,642	Yes	**	0.0074
120.093	24.7478	107.773	55.7109	110.36	78.9006		cpk5/6/11 vs. cpk3/5/6/11	-20.51	-40,08 to -0,9301	Yes	*	0.0338
157.493	81.7849	90.7372	106.222	86.4726	79.0655
64.8571	36.5066	212.5	182.708	14.6556	24.1678		Test details	Mean 1	Mean 2	Mean Diff,	SE of diff,	n1	n2	q	DF
37.6853	83.2091	83.8715	43.5138	68.6904	116.063		Col-0 vs. cpk1/2	94.65	94.03	0.6287	6.219	490	93	0.143	1144
156.441	44.7498	49.934	14.3729	69.8699	147.638		Col-0 vs. cpk5/6	94.65	84.77	9.888	5.563	490	122	2.514	1144
55.5287	39.6844	82.4954	122.828	70.3072	55.1709		Col-0 vs. cpk1/2/5/6	94.65	91.52	3.131	5.344	490	135	0.8285	1144
71.5602	42.8435	242.477	162.641	38.2234	114.297		Col-0 vs. cpk5/6/11	94.65	91.83	2.82	6.276	490	91	0.6354	1144
60.7422	89.1341	117.428	78.9553	47.1053	145.37		Col-0 vs. cpk3/5/6/11	94.65	112.3	-17.69	4.469	490	219	5.596	1144
57.5182	53.3528	64.8615	77.0529	33.8122	131.994		cpk1/2 vs. cpk5/6	94.03	84.77	9.26	7.569	93	122	1.73	1144
67.481	90.2039	107.897	28.2207	23.2574	185.559		cpk1/2 vs. cpk1/2/5/6	94.03	91.52	2.502	7.41	93	135	0.4776	1144
53.3076	58.6891	137.293	82.5866	74.4858	158.552		cpk1/2 vs. cpk5/6/11	94.03	91.83	2.191	8.107	93	91	0.3822	1144
20.5248	93.6388	43.1185	100.874	70.6024	113.946		cpk1/2 vs. cpk3/5/6/11	94.03	112.3	-18.31	6.805	93	219	3.806	1144
99.2865	66.6304	59.1805	160.435	60.8827	170.034		cpk5/6 vs. cpk1/2/5/6	84.77	91.52	-6.757	6.868	122	135	1.391	1144
29.9773	251.097	49.6253	36.7616	58.248	79.3422		cpk5/6 vs. cpk5/6/11	84.77	91.83	-7.069	7.616	122	91	1.313	1144
56.6606	28.9407	140.21	107.277	79.269	77.6387		cpk5/6 vs. cpk3/5/6/11	84.77	112.3	-27.57	6.212	122	219	6.278	1144
36.5158	115.041	59.8258	78.3629	57.8814	83.5562		cpk1/2/5/6 vs. cpk5/6/11	91.52	91.83	-0.3114	7.458	135	91	0.05906	1144
29.7391	68.2326	36.2726	171.493	47.0346	113.569		cpk1/2/5/6 vs. cpk3/5/6/11	91.52	112.3	-20.82	6.017	135	219	4.893	1144
79.7523	68.2326	191.987	142.302	61.544	74.1574		cpk5/6/11 vs. cpk3/5/6/11	91.83	112.3	-20.51	6.858	91	219	4.229	1144
34.949	29.1513	101.03	127.591	130.359	135.34
97.6399	35.6032	67.5131	147.34	104.725	78.4775
61.0205	231.005	53.1128	64.9334	52.8569	46.3521
142.45	149.792	116.441	98.7673	98.5626	61.0093
94.4423	33.2646	25.0715	137.542	22.3894	210.718
51.4277	136.4	74.47	74.5498	91.8588	218.955
78.4652	109.47	133.744	52.2651	185.179	127.556
57.2421	26.554	55.0679	159.592	202.485	238.676
85.9416	234.201	40.4026	101.399	129.975	161.717
21.5004	117.608	47.8006	144.093	50.3075	32.7832
31.4579	121.282	49.3924	36.3579	50.0408	116.08
27.7319	147.308	32.2965	18.0139	66.7633	102.882
86.3905	123.157	32.0226	113.96	46.8295	191.134
59.4018	115.814	54.4473	15.934	96.8039	35.2476
84.2656	102.531	33.7551	185.223	56.8099	46.5792
51.2082	100.146	34.9496	230.142	216.015	28.873
107.588	107.6	41.0744	33.7754	52.7463	101.464
75.9317	36.4638	21.817	43.6639	69.7452	97.3862
41.828	102.921	43.6706	139.573	205.92	171.786
155.378	61.1205	23.6365	45.1086	106.902	222.563
33.0598	78.7418	18.5463	62.2301	82.9963	52.209
32.3374	92.1565	36.3778	57.1715	71.7954	64.4065
76.8045	39.5373	80.4099	54.5409	111.488	55.7698
80.4026	40.9613	64.529	75.6133	103.843	75.0233
40.5952	41.2486	44.8117	47.1437	29.0732	154.229
63.4144	72.1493	22.8868	56.1166	143.85	86.9302
63.3136	92.3135	30.7767	46.8202		58.0019
88.5699	77.8444	43.8232	93.9307		86.6945
81.5231		14.5408	62.6415		75.4337
112.771		71.3175	44.742		47.8584
165.771		92.0548	195.275		68.2037
180.96		51.0496	98.8517		124.873
102.427		58.3988	101.796		74.3177
135.144		117.874	46.5422		63.4812
92.1827		81.6058	82.8761		55.7243
132.165		36.7924	91.9953		91.9738
47.4581		64.7169	93.9816		82.4078
92.8665		50.9849	80.9213		126.588
200.69		36.0969	79.3323		90.468
91.7312		20.457	149.3		151.343
165.892		83.344	167.584		105.122
137.258		36.5387	146.889		134.971
252.684		57.1333	200.081		92.1081
131.206		88.7377	161.309		209.897
166.077		126.594	55.1323		165.115
106.532		44.5402	132.765		147.429
224.748		96.2306	140.866		151.114
159.843		111.454	144.093		66.0517
140.072		93.1794	36.3579		94.3004
224.815		39.3715	18.0139		55.7698
182.378		164.709	113.96		124.288
125.944		154.365	15.934		141.558
44.4914		122.069	185.223		123.432
10.6426		162.477	230.142		189.102
226.555		18.4136	33.7754		203.182
114.1		11.3961	43.6639		90.4184
68.8357		23.929	139.573		184.995
129.948			45.1086		146.369
105.749			62.2301		41.4123
94.1834			57.1715		130.433
140.169			54.5409		118.234
127.834			75.6133		76.0194
96.3916			47.1437		49.2044
58.4966			56.1166		103.796
73.2577			46.8202		70.6087
176.798			93.9307		71.4008
132.283			62.6415		67.4306
133.851			44.742		72.1813
165.736			195.275		62.5151
90.155			98.8517		182.096
175.609					74.2663
85.064					74.7239
113.536					37.3563
127.644					171.011
61.0345					182.369
75.8508					229.396
172.64					178.226
43.2891					148.376
66.6791					79.0977
75.3291					84.6975
66.2211					74.5758
73.9968					76.4055
80.4435					53.3517
166.26					218.379
246.514					183.684
136.826					106.515
110.856					80.6461
120.571					228.528
113.991					150.769
79.8499					225.906
52.1503					50.6485
75.8008					124.692
69.7298					198.045
55.0398					188.954
88.7623					109.342
66.9855					92.7847
66.5286					199.982
78.069					175.487
105.687					135.71
105.936					175.335
62.2305					39.059
71.2307					201.036
98.7057					59.0081
64.8721					161.488
92.9126					67.664
139.265					173.507
76.5058					255.511
47.4831					133.608
22.7138					50.6092
24.6378					175.267
112.356					207.786
101.535					193.612
147.251					71.3919
55.1154					49.526
27.8022					199.656
126.358					88.3168
134.948					90.7411
144.721					41.9132
103.584					28.4797
98.1433					79.2411
209.395					91.0605
86.4771					138.518
43.464					93.269
161.921					62.7822
245.455					70.2151
176.864					252.49
243.544					234.72
46.5121					110.294
113.74					88.3941
87.0752					51.8088
43.9394					56.4981
94.9721					115.713
27.8697					145.388
159.583					63.9149
145.573					39.513
105.312					243.712
151.977					225.741
199.421					152.229
99.2144					71.2506
77.899					49.2151
73.7666					52.4198
54.1378					52.7915
42.0062					54.5581
18.9809					117.092
64.3113					33.454
77.1868					153.483
80.9932					122.371
64.3474					109.632
180.197					68.6581
40.2992					78.0954
99.688					43.9915
81.1184					34.8981
72.7203					47.9256
81.7253					64.2628
20.5765
41.9725
17.13
135.072
45.1642
108.007
130.935
43.3332
25.8534
27.0096
109.394
108.461
38.3938
24.9805
102.692
24.3999
134.877
44.9718
101.071
161.363
58.5779
95.2439
179.177
39.2816
159.937
105.099
120.912
77.4124
167.034
174.133
76.6141
125.24
130.412
75.9143
41.2706
186.191
105.562
173.134
88.3748
47.0439
8.09976
77.3056
149.958
83.2148
78.3593
50.6256
82.9764
37.6734
111.836
67.9893
189.476
98.0115
64.5416
109.16
104.703
88.8971
167.767
54.1107
194.523
70.1322
194.602
142.344
98.3094
35.0257
6.00622
77.1962
27.4561
76.0991
107.087
71.7821
103.805
136.605
106.624
47.2931
137.161
112.499
49.2266
126.161
15.4886
212.911
175.972
170.033
89.8126
69.076
74.7715
97.9435
70.7021
203.828
73.8287
18.5405
20.4548
40.0598
176.059
173.375
54.8179
85.9343
110.744
114.435
145.933
65.1876
154.191
56.2342
54.608
118.982
52.2035
83.2484
72.6512
60.7463
33.3431
142.266
176.09
134.001
133.148
110.32
21.2419
107.272
132.734
10.5205
227.369
234.543
113.137
59.4629
92.124
49.7773
155.12
29.1596
77.1461
79.3665
29.8269
70.79
67.1129
28.8741
42.8677
140.542
42.8246
37.7254
68.218
34.5835
86.7095
109.383
42.8358
55.1812
91.1117
36.9522
80.1099
236.635
21.6592
148.496
229.362
48.3531
43.0546
37.98
40.0461
52.7274
25.9107
79.8874
50.1659
49.4104
252.091
149.929
80.4821
214.708
128.513
96.114
97.492
123.16
131.137
40.2208
102.899
99.5685
60.8641
45.7025
103.841
114.753
89.1064
139.158
134.335
89.4693
46.6345
157.245
125.845
85.7863
96.2971
110.457
116.804
52.1557
11.1399
74.4151
57.1258
124.214
209.07
134.71
96.9815
228.593
41.004
125.211
50.4654
79.9926
204.008
88.927
41.5127
63.6058
62.4972
52.3511
124.27
96.5286
59.3468
196.099
50.1483
16.7008
36.6449
90.8492
47.2157
52.1557
11.1399
74.4151
57.1258
124.214
209.07
134.71
96.9815
228.593
41.004
125.211
50.4654
79.9926
204.008
88.927
41.5127
63.6058
62.4972
52.3511
124.27
96.5286
59.3468
196.099
50.1483
16.7008
36.6449
90.8492
47.2157
16.4136
105.685
138.496
49.5612
55.8991
42.0257
210.933
87.0186
98.6284
85.3481
70.4604
107.336
23.3506
131.337
75.0294
93.0214
66.7764
85.949
43.8572
93.1816
51.4925
59.3291
37.6052
130.02
56.8059
216.501
35.3568
20.1207
37.4758
72.476
