# Supplementary material for: Interdependence of plasma membrane nanoscale dynamics of a kinase and its cognate substrate underlies Arabidopsis response to viral infection
Source: eLife. 2025 May 2;12:RP90309. doi: 10.7554/eLife.90309 (PMC12048157; doi:10.7554/eLife.90309)
Supplement: Figure 1—source data 4. [file elife-90309-fig1-data4.xlsx]

## Sheet: Feuil1
Foci area (% of Col-0 mean)						Statistical analysis
Col0	cpk3-1	cpk3-2	OE 8.2	OE 16.2		ANOVA summary
134.001	40.0635	403.746	127.732	59.4099		F	54.49
133.148	220.253	291.912	68.4787	121.656		P value	<0,0001
110.32	46.1786	488.944	75.521	77.3966		P value summary	****
21.2419	208.532	516.183	95.494	71.1707		Significant diff. among means (P < 0.05)?	Yes
107.272	234.811	490.866	61.2441	27.4887		R squared	0.1368
132.734	221.107	313.664	82.3589	217.936
10.5205	40.4248	155.564	47.9198	31.5351		Brown-Forsythe test
227.369	136.799	42.3606	166.988	201.127		F (DFn, DFd)	16,49 (4, 1375)
234.543	150.982	181.205	49.2256	108.607		P value	<0,0001
113.137	598.245	102.179	25.4638	52.163		P value summary	****
59.4629	120.627	22.0125	31.3261	168.558		Are SDs significantly different (P < 0.05)?	Yes
92.124	110.709	64.087	24.8741	117.703
49.7773	184.235	109.95	30.9959	99.8338		Bartlett's test
155.12	32.7434	313.284	69.2357	101.707		Bartlett's statistic (corrected)	105.1
29.1596	130.413	122.153	35.6152	113.028		P value	<0,0001
77.1461	77.5653	134.865	41.6557	57.8797		P value summary	****
79.3665	70.731	119.965	37.3531	53.9175		Are SDs significantly different (P < 0.05)?	Yes
29.8269	108.039	270.756	67.786	23.8898
70.79	51.5642	162.757	119.336	90.6176		ANOVA table	SS	DF	MS	F (DFn, DFd)	P value
67.1129	411.268	163.309	33.5764	179.081		Treatment (between columns)	1666761	4	416690	F (4, 1375) = 54,49	P<0,0001
28.8741	97.1882	189.265	205.86	86.0989		Residual (within columns)	10514469	1375	7647
42.8677	219.441	114.058	30.852	35.5532		Total	12181230	1379
140.542	46.5415	138.849	29.4454	82.9581
265.67	24.1277	105.899	54.998	59.1364		Data summary
42.8246	48.8407	147.537	155.208	26.8177		Number of treatments (columns)	5
37.7254	70.3246	85.4242	51.0649	49.4187		Number of values (total)	1380
68.218	83.4089	187.518	159.359	103.032
262.386	47.8198	176.907	65.556	53.8493
34.5835	43.2016	395.735	14.339	54.3509		Number of families	1
86.7095	62.4111	199.581	63.3264	164.997		Number of comparisons per family	10
109.383	84.4337	171.555	47.2473	118.785		Alpha	0.05
42.8358	166.195	150.877	82.3474	22.9217
55.1812	263.427	155.745	45.9006	45.8823		Tukey's multiple comparisons test	Mean Diff,	95,00% CI of diff,	Below threshold?	Summary	Adjusted P Value
91.1117	451.979	98.6228	85.9819	40.5857		Col0 vs. cpk3-1	-48.1	-67,68 to -28,52	Yes	****	<0,0001
36.9522	90.6562	269.13	33.6401	33.0549		Col0 vs. cpk3-2	-84.76	-104,0 to -65,56	Yes	****	<0,0001
80.1099		100.525	195.782	41.1081		Col0 vs. OE 8.2	-1.163	-21,16 to 18,83	No	ns	0.9999
236.635		504.336	78.5276	40.9974		Col0 vs. OE 16.2	20.42	0,9495 to 39,90	Yes	*	0.0344
21.6592		137.135	117.412	44.282		cpk3-1 vs. cpk3-2	-36.66	-60,17 to -13,14	Yes	***	0.0002
148.496	200.389	42.6362	145.135	47.9585		cpk3-1 vs. OE 8.2	46.94	22,77 to 71,11	Yes	****	<0,0001
229.362	114.743	67.9576	134.675	72.8041		cpk3-1 vs. OE 16.2	68.53	44,79 to 92,27	Yes	****	<0,0001
48.3531	198.621	294.002	62.588	129.569		cpk3-2 vs. OE 8.2	83.6	59,74 to 107,5	Yes	****	<0,0001
43.0546	86.5744	340.507	39.0622	74.1942		cpk3-2 vs. OE 16.2	105.2	81,76 to 128,6	Yes	****	<0,0001
37.98	57.5746	277.829	72.359	250.117		OE 8.2 vs. OE 16.2	21.59	-2,495 to 45,67	No	ns	0.1033
40.0461	131.041	397.748	47.3029	250.011
52.7274	64.5508	410.978	143.314	425.998		Test details	Mean 1	Mean 2	Mean Diff,	SE of diff,	n1	n2	q	DF
25.9107	152.242	225.054	177.765	53.2711		Col0 vs. cpk3-1	100	148.1	-48.1	7.169	573	201	9.49	1375
79.8874	101.167	156.353	56.0378	34.2517		Col0 vs. cpk3-2	100	184.8	-84.76	7.03	573	212	17.05	1375
50.1659	39.1809	336.576	70.8363	67.1192		Col0 vs. OE 8.2	100	101.2	-1.163	7.321	573	190	0.2247	1375
49.4104	32.8734	46.4668	134.285	77.3447		Col0 vs. OE 16.2	100	79.58	20.42	7.13	573	204	4.051	1375
252.091	148.386	297.839	124.446	26.1142		cpk3-1 vs. cpk3-2	148.1	184.8	-36.66	8.609	201	212	6.022	1375
149.929	105.13	256.661	72.1197	74.7947		cpk3-1 vs. OE 8.2	148.1	101.2	46.94	8.848	201	190	7.503	1375
80.4821	76.4228	67.3822	62.5073	49.7214		cpk3-1 vs. OE 16.2	148.1	79.58	68.53	8.691	201	204	11.15	1375
214.708	294.196	290.348	16.1882	34.7842		cpk3-2 vs. OE 8.2	184.8	101.2	83.6	8.736	212	190	13.53	1375
128.513	261.24	241.235	12.2714	16.7187		cpk3-2 vs. OE 16.2	184.8	79.58	105.2	8.576	212	204	17.34	1375
96.114	79.2889	216.234	111.658	24.1591		OE 8.2 vs. OE 16.2	101.2	79.58	21.59	8.817	190	204	3.463	1375
97.492	261.741	146.727	51.9428	56.2619
123.16	53.5064	276.094	60.5078	31.575
131.137	114.443	71.2024	72.7475	95.1039
40.2208	143.199	145.613	80.4465	48.3194
102.899	213.293	32.1144	61.7182	57.1956
259.643	311.885	199.479	49.8719	48.2561
99.5685	259.029	67.8467	17.2236	72.2276
60.8641	133.178	152.075	24.5542	33.1005
45.7025	175.527	261.005	50.3226	36.737
103.841	130.067	188.116	40.5347	76.0153
114.753	76.4896	172.961	66.3969	40.8946
89.1064	139.845	263.377	37.6436	23.0392
139.158	194.812	347.658	35.3372	32.0463
134.335	42.4299	183.782	42.5217	51.994
89.4693	66.7593	81.4421	110.387	53.6596
46.6345	61.7788	202.731	98.85	71.4135
157.245	174.393	71.753	131.121	55.4838
125.845	126.887	125.94	39.2769	36.6897
85.7863	68.5313	49.1635	50.1874
96.2971	239.137	123.199	53.5276	27.8184
110.457	71.6822	43.8883	32.2341	114.556
116.804	164.029	86.1098	41.1854	62.8034
83.9097	309.464	218.281	33.5469	30.0333
252.821	181.2	281.279	41.1358	58.5721
520.418	112.476	334.922	87.7825	28.0518
12.8093	48.9036	284.749	58.4314	98.4148
8.2781	306.11	150.774	40.4121	71.6881
13.5406	111.898	232.176	21.9922	67.9341
43.177	18.1667	104.797	30.4983	31.7396
175.62	121.75	133.773	33.4069	18.2306
115.68	88.6457	126.488	22.1421	13.2035
118.797	65.5701	116.712	95.6423	65.8684
151.463	90.7304	88.899	109.956	44.1415
143.717	107.041	262.524	45.1376	23.1826
77.5925	123.658	119.584	49.0604	87.7433
74.5885	173.518	163.81	64.1722	108.312
50.1481	97.1601	176.359	53.5184	89.5376
73.4942	43.2865	179.143	28.8361	36.2659
40.7503	107.074	99.1368	55.7092	42.8892
67.4845	109.354	72.5086	80.3593	36.4451
241.219	73.0249	154.504	43.1272	52.7623
114.422	375.287	94.185	21.178	64.3446
54.0107	276.869	257.191	78.0595	86.6026
44.6102	141.847	174.614	43.2057	106.979
75.4702	277.876	249.169	69.5741	37.078
29.5234	61.0777	199.636	190.183	209.703
61.529	188.41	178.988	145.631	245.566
83.0415	243.801	192.011	31.6984	25.2252
16.4167	122.639	252.83	35.431	49.5386
36.0169	310.567	224.58	98.1655	43.1564
61.1152	204.102	153.947	89.048	31.9114
103.202	144.729	113.017	181.135	42.2446
28.0186	120.281	124.566	124.606	30.9996
211.027	285.579	147.048	122.783	21.5782
92.1742	137.301	171.208	152.567	20.6664
63.9995	216.702	44.4056		27.0487
45.1422	132.215	58.6224	118.224	43.1564
52.3347	119.941	238.174	88.1362	22.7939
61.7389	140.941	183.799	93.3029	84.7931
59.6906	96.933	165.614	148.312	58.9601
56.2598	66.176	83.5008	60.1758	59.5679
150.253	103.762	88.6247	188.125	23.7056
26.2314	80.9601	186.27	283.252	21.2743
91.5722	79.2447	106.302	55.9209	106.979
93.632	112.677	163.228	99.6851	12.4606
33.8846	337.928	417.17	165.331	106.979
29.3554	139.086	112.208	112.45	150.136
40.6525	86.5858	92.9898	66.2541	42.2446
110.278	77.2276	44.3608	188.733	56.2248
31.095	99.7092	47.0677	108.195	84.1853
52.4035	111.005	141.104	50.4504	43.4603
33.2368	205.279	68.4958	34.0388	55.0092
33.5017	174.422	56.157	56.5288	71.7247
26.0517	69.3493	115.729	75.6756	120.352
38.7616	89.2796	74.9419	30.9996	60.4797
147.709	177.965	69.3767	86.6167	56.8327
118.045	102.526	101.74	89.3519	122.479
23.0899	359.068	134.403	173.233	82.6657
18.1703	121.564	197.965	41.3329	48.9308
135.68	141.216	56.5423	129.165	148.92
79.9296	163.705	293.859	217.605	163.812
132.678	146.189	393.7	65.9502	80.5383
87.0065	154.141	303.674	30.3918	34.0388
122.862	34.911	150.347	77.803	37.9898
129.399	110.25	118.919	84.7931	30.9996
52.1931	95.5634	135.246	179.008	35.8623
69.0068	439.315	142.455	202.713	57.1366
55.4042	92.4079	37.5553	54.4013	275.654
51.9248	34.6934	88.5668	28.2644	46.4995
28.1318	103.908	73.9781	27.0487	25.2252
112.537	96.7918	221.412	63.8228	158.341
59.0714	285.59	76.6491	171.106	145.881
70.5936		183.499	115.185	113.361
43.1682	116.716	248.587	200.282	111.538
31.775	212.456	130.292	99.3812	49.5386
45.6925	31.2605	169.625	93.9107	44.9799
59.033	320.805	138.024	84.4892	19.4508
38.9295	434.998	120.859	59.8719	35.5584
46.9979	501.236	119.291	47.1073	39.5094
64.3846	61.4014	182.728	50.7543	101.509
375.569	30.9137	137.072	62.3032	64.7346
174.104	34.7253	127.214	87.2245	60.7836
85.8287	74.968	112.626	104.852	72.9403
38.1419	121.672	217.473	136.763	62.6071
98.5885	33.4698	403.746	360.236	98.4695
79.754	197.585	291.912	124.061	21.8821
61.0262	96.3639	488.944	106.949	55.0092
53.3252	63.7254	516.183	75.1405	74.4599
79.8378	193.022	490.866	92.8958	52.5778
76.7631	110.594	313.664	79.4739	57.7444
36.539	265.557	155.564	139.928	30.0879
103.644	62.7232	42.3606	150.465	44.0681
74.6355	37.3286	181.205	190.284	30.9996
49.3916	377.375	102.179	63.6516	16.7155
107.017	165.083	22.0125	87.3721	76.5874
86.9863		64.087	95.072	26.7448
105.14	233.678	109.95	30.0414	74.7638
51.8391	447.303	313.284	299.866	14.5881
74.2425	261.196	122.153	112.863	63.215
86.131	250.656	134.865	105.429	25.833
71.1407	188.389	119.965	96.6053	29.4801
91.9225	162.845	270.756	273.919	15.1959
40.8464	24.5169	162.757	80.7042	27.3526
154.118	14.7338	163.309	243.707	20.6664
210.42	33.0626	189.265	174.362	24.3134
61.7024	205.969	114.058	420.906	14.892
62.3577	74.927	138.849	285.288	168.978
69.3655	246.305	105.899	356.687	117.92
62.602	278.513	147.537	356.437	244.113
88.0469		85.4242	328.884	140.689
116.067	423.98	187.518	419.818	272.08
22.9793	157.766	176.907	322.578	134.788
63.4498		395.735	299.289	273.005
104.593	232.465	199.581	436.659	74.4564
34.5686	107.735	171.555	112.018	118.379
254.636	38.339	150.877	92.6255	222.285
113.956	31.8904	155.745		193.94
55.6091	125.269	98.6228		133.008
123.611	39.2822	269.13		136.069
101.169	84.511	100.525		152.444
87.5462	23.4485	504.336		133.785
300.454	34.8591	137.135		153.019
72.8534	46.7621	42.6362		195.702
129.686	42.3977	67.9576		262.183
702.246	48.5414	294.002		219.483
209.796	111.844	340.507		93.4842
71.6418	285.529	277.829		110.246
37.6316	40.2557	397.748		62.24
44.486	242.738	410.978		151.555
151.324	59.9503	225.054		61.0835
36.4793	248.608	156.353
96.8191	56.0487	336.576
38.1959	580.459	46.4668
187.947		297.839
57.9352		256.661
69.2677		67.3822
69.0034		290.348
67.5803
65.1925
51.4135
119.03
257.162
300.399
183.393
39.5837
38.2652
198.991
48.6511
35.2892
216.135
173.329
39.7116
154.139
206.044
58.3839
117.227
109.759
137.583
391.632
159.495
85.0286
367.025
88.6638
142.166
96.8148
84.2128
57.0591
116.936
97.6422
69.4137
43.1175
73.2912
28.1421
49.6419
12.0465
117.278
78.9145
149.456
128.717
35.4049
85.851
79.2087
204.539
10.4265
180.08
69.9294
120.859
40.0329
106.454
127.497
61.4477
25.0497
43.9827
43.8128
127.665
28.8426
102.476
39.7573
85.0239
106.826
166.908
104.353
84.7368
93.6454
108.105
139.348
316.986
75.0233
130.268
130.268
164.186
39.9541
42.3463
41.4062
48.0601
102.312
47.2473
242.287
109.203
53.68
77.8471
162.137
162.075
80.9126
75.8588
269.566
41.5043
97.1717
155.878
238.127
108.836
62.3032
25.5291
49.8426
85.401
161.988
183.263
55.617
30.9996
269.879
42.2446
83.2736
40.1172
136.155
77.803
60.1758
77.4991
30.3918
96.9499
398.741
197.851
229.154
57.7444
104.852
130.381
55.617
36.7741
21.2743
31.3036
30.6957
47.7151
116.401
439.162
61.0875
48.0191
23.7056
34.0388
57.4405
35.8623
222.164
107.891
44.0681
27.6565
69.2933
53.7935
62.911
87.5284
69.2933
190.557
171.106
37.6858
69.5972
164.724
55.3131
119.44
117.312
140.106
206.968
161.077
210.311
208.488
118.224
75.9795
51.6661
92.3911
59.264
49.2347
60.4797
35.2545
134.028
278.085
155.302
120.352
118.224
88.4402
55.617
49.5386
41.6368
58.0484
57.4405
166.547
207.576
81.45
86.0088
108.499
62.3032
137.979
82.3618
343.427
158.645
31.9114
99.6851
26.7448
26.137
282.036
47.1073
133.116
26.137
9.42146
42.8524
115.185
29.1761
52.2739
20.3625
92.3911
83.5775
39.5094
141.322
34.0388
67.1659
135.851
105.46
134.001
133.148
110.32
21.2419
107.272
132.734
10.5205
227.369
234.543
113.137
59.4629
92.124
49.7773
155.12
29.1596
77.1461
79.3665
29.8269
70.79
67.1129
28.8741
42.8677
140.542
265.67
42.8246
37.7254
68.218
262.386
34.5835
86.7095
109.383
42.8358
55.1812
91.1117
36.9522
80.1099
236.635
21.6592
148.496
229.362
48.3531
43.0546
37.98
40.0461
52.7274
25.9107
79.8874
50.1659
49.4104
252.091
149.929
80.4821
214.708
128.513
96.114
97.492
123.16
131.137
40.2208
102.899
259.643
99.5685
60.8641
45.7025
103.841
114.753
89.1064
139.158
134.335
89.4693
46.6345
157.245
125.845
85.7863
96.2971
110.457
116.804
83.9097
86.0192
28.0744
119.805
240.195
129.474
43.3074
193.638
72.3439
52.9667
65.3011
66.8764
35.9266
26.1297
505.213
48.6276
26.5712
33.6617
109.523
139.307
170.094
233.309
44.4629
40.3009
50.3315
98.7024
31.7911
54.4115
258.336
132.758
122.547
74.5479
91.32
36.2843
103.635
30.8059
79.2638
18.9266
90.1661
65.3214
76.8601
128.015
40.6031
199.113
146.741
128.352
215.255
100.218
181.372
281.892
80.1171
110.761
42.0986
93.7166
139.133
85.8937
61.8866
50.2545
100.299
83.6442
77.9719
124.182
162.14
163.564
26.0091
47.7097
29.551
35.3196
91.3963
14.9492
21.7263
23.5693
20.7976
80.0075
269.06
54.2144
96.2111
164.575
100.545
