# Supplementary material for: Interdependence of plasma membrane nanoscale dynamics of a kinase and its cognate substrate underlies Arabidopsis response to viral infection
Source: eLife. 2025 May 2;12:RP90309. doi: 10.7554/eLife.90309 (PMC12048157; doi:10.7554/eLife.90309)
Supplement: Figure 1—source data 5. [file elife-90309-fig1-data5.xlsx]

## Sheet: Feuil1
Fluorescence intensity (arbitrary units)										Statistical analysis
Col0_10	cpk3_10	CPK3_10	Col0_14	cpk3_14	CPK3_14	Col0_17	cpk3_17	CPK3_17		Kruskal-Wallis test
2020583	2032775	71545	3354917	3992517	65213	6722084	5635191	1004247		P value	<0,0001
1362100	1349988	257396	2858077	4529885	90410	4598270	5589504	3704774		Exact or approximate P value?	Approximate
1450657	2020138	81343	2253376	4917363	70431	4237599	6864084	376045		P value summary	****
1870336	1881007	1725578	5185011	3663081	4681275	6867876	6092681	1479807		Do the medians vary signif. (P < 0.05)?	Yes
1623333	2263274	88804	2665241	3925481	79843	5088427	5686833	8067888		Number of groups	9
2910861	2838823	26615	4481501	4623227	72402	5211205	5634698	245487		Kruskal-Wallis statistic	69.06
1439591	2418423	93315	1975641	4511587	204459	4290394	7233717	95352
2162512	2613190		3988594	4653040	57935	7534960	6256713	284720		Data summary
1927201	1458052		2122013	3702032	2561068	2841650	5979906	41391		Number of treatments (columns)	9
1682311	2583614		2765327	7213916	90660	3813681	10044375	207845		Number of values (total)	235
30210	187541		16071	75060	51321	604958	4452796	7021295
43561	79305		27539	261337	57730	606161	7347268	153645		Dunn's multiple comparisons test	Mean rank diff,	Significant?	Summary	Adjusted P Value
168594	10838		11297	111407	16455	30862	739479	44142		Col0_10 vs. cpk3_10	21.38	No	ns	>0,9999
4267	533860		11297	43415	23126	55229	6549634	109257		Col0_10 vs. CPK3_10	37.36	No	ns	>0,9999
188785	3917		26037	157538	965920	108207	2463237	18562		Col0_10 vs. Col0_14	4.531	No	ns	>0,9999
105436	12726		292751	4574366	889672	256631	10524399	678708		Col0_10 vs. cpk3_14	-32.34	No	ns	>0,9999
	26377		1227015	2763749	53450	1166644	6454691	251161		Col0_10 vs. CPK3_14	34.44	No	ns	>0,9999
	42234		122862	47729		4296422	5420857	359422		Col0_10 vs. Col0_17	-34.01	No	ns	>0,9999
	97309		22693	424413		358779	2817665	165079		Col0_10 vs. cpk3_17	-82.98	Yes	**	0.0013
	10249		4550594	143602		44917	7992301	2831164		Col0_10 vs. CPK3_17	-1.917	No	ns	>0,9999
	20516		461770	591103		10750206	4147663	2707568		cpk3_10 vs. CPK3_10	15.98	No	ns	>0,9999
	22213		7106	10219367		2453458	10624290	240056		cpk3_10 vs. Col0_14	-16.84	No	ns	>0,9999
	149203		11909	20753		38357	9796654	346606		cpk3_10 vs. cpk3_14	-53.72	No	ns	0.0879
	25662		23003	1520805		99777	6728688	2604422		cpk3_10 vs. CPK3_14	13.07	No	ns	>0,9999
			125108	1619818		405040	6007836			cpk3_10 vs. Col0_17	-55.39	No	ns	0.0677
			571273	3272554		79718	713314			cpk3_10 vs. cpk3_17	-104.4	Yes	****	<0,0001
			2651459	4088803		3673506	69566			cpk3_10 vs. CPK3_17	-23.29	No	ns	>0,9999
			224937	636282		7997655	4058664			CPK3_10 vs. Col0_14	-32.83	No	ns	>0,9999
			254351	5588509		875447	18290334			CPK3_10 vs. cpk3_14	-69.7	No	ns	0.4564
			204707	406491		1341312	2121772			CPK3_10 vs. CPK3_14	-2.916	No	ns	>0,9999
			1495445	2380846		572761	4468563			CPK3_10 vs. Col0_17	-71.37	No	ns	0.3911
			89645	869011		2845101	549223			CPK3_10 vs. cpk3_17	-120.3	Yes	***	0.0006
				4085611		1309717	7382999			CPK3_10 vs. CPK3_17	-39.27	No	ns	>0,9999
				77104		7048577	11056336			Col0_14 vs. cpk3_14	-36.87	No	ns	0.8561
				3234777		2355030	1993567			Col0_14 vs. CPK3_14	29.91	No	ns	>0,9999
				18413		700611	1740294			Col0_14 vs. Col0_17	-38.54	No	ns	0.6783
				3680383		123735	1740294			Col0_14 vs. cpk3_17	-87.51	Yes	****	<0,0001
				559326			1926882			Col0_14 vs. CPK3_17	-6.448	No	ns	>0,9999
							2402853			cpk3_14 vs. CPK3_14	66.78	Yes	*	0.0274
							219516			cpk3_14 vs. Col0_17	-1.671	No	ns	>0,9999
										cpk3_14 vs. cpk3_17	-50.63	Yes	*	0.0363
										cpk3_14 vs. CPK3_17	30.43	No	ns	>0,9999
										CPK3_14 vs. Col0_17	-68.45	Yes	*	0.0212
										CPK3_14 vs. cpk3_17	-117.4	Yes	****	<0,0001
										CPK3_14 vs. CPK3_17	-36.36	No	ns	>0,9999
										Col0_17 vs. cpk3_17	-48.96	No	ns	0.0573
										Col0_17 vs. CPK3_17	32.1	No	ns	>0,9999
										cpk3_17 vs. CPK3_17	81.06	Yes	***	0.0001
										Test details	Mean rank 1	Mean rank 2	Mean rank diff,	n1	n2	Z
										Col0_10 vs. cpk3_10	99.5	78.13	21.38	16	24	0.9742
										Col0_10 vs. CPK3_10	99.5	62.14	37.36	16	7	1.213
										Col0_10 vs. Col0_14	99.5	94.97	4.531	16	32	0.2177
										Col0_10 vs. cpk3_14	99.5	131.8	-32.34	16	38	1.596
										Col0_10 vs. CPK3_14	99.5	65.06	34.44	16	17	1.454
										Col0_10 vs. Col0_17	99.5	133.5	-34.01	16	37	1.672
										Col0_10 vs. cpk3_17	99.5	182.5	-82.98	16	40	4.126
										Col0_10 vs. CPK3_17	99.5	101.4	-1.917	16	24	0.08735
										cpk3_10 vs. CPK3_10	78.13	62.14	15.98	24	7	0.5473
										cpk3_10 vs. Col0_14	78.13	94.97	-16.84	24	32	0.9175
										cpk3_10 vs. cpk3_14	78.13	131.8	-53.72	24	38	3.031
										cpk3_10 vs. CPK3_14	78.13	65.06	13.07	24	17	0.6063
										cpk3_10 vs. Col0_17	78.13	133.5	-55.39	24	37	3.109
										cpk3_10 vs. cpk3_17	78.13	182.5	-104.4	24	40	5.945
										cpk3_10 vs. CPK3_17	78.13	101.4	-23.29	24	24	1.187
										CPK3_10 vs. Col0_14	62.14	94.97	-32.83	7	32	1.157
										CPK3_10 vs. cpk3_14	62.14	131.8	-69.7	7	38	2.493
										CPK3_10 vs. CPK3_14	62.14	65.06	-2.916	7	17	0.09551
										CPK3_10 vs. Col0_17	62.14	133.5	-71.37	7	37	2.547
										CPK3_10 vs. cpk3_17	62.14	182.5	-120.3	7	40	4.32
										CPK3_10 vs. CPK3_17	62.14	101.4	-39.27	7	24	1.345
										Col0_14 vs. cpk3_14	94.97	131.8	-36.87	32	38	2.261
										Col0_14 vs. CPK3_14	94.97	65.06	29.91	32	17	1.466
										Col0_14 vs. Col0_17	94.97	133.5	-38.54	32	37	2.349
										Col0_14 vs. cpk3_17	94.97	182.5	-87.51	32	40	5.427
										Col0_14 vs. CPK3_17	94.97	101.4	-6.448	32	24	0.3512
										cpk3_14 vs. CPK3_14	131.8	65.06	66.78	38	17	3.367
										cpk3_14 vs. Col0_17	131.8	133.5	-1.671	38	37	0.1064
										cpk3_14 vs. cpk3_17	131.8	182.5	-50.63	38	40	3.288
										cpk3_14 vs. CPK3_17	131.8	101.4	30.43	38	24	1.716
										CPK3_14 vs. Col0_17	65.06	133.5	-68.45	17	37	3.437
										CPK3_14 vs. cpk3_17	65.06	182.5	-117.4	17	40	5.965
										CPK3_14 vs. CPK3_17	65.06	101.4	-36.36	17	24	1.687
										Col0_17 vs. cpk3_17	133.5	182.5	-48.96	37	40	3.157
										Col0_17 vs. CPK3_17	133.5	101.4	32.1	37	24	1.801
										cpk3_17 vs. CPK3_17	182.5	101.4	81.06	40	24	4.618
