# Supplementary material for: Interdependence of plasma membrane nanoscale dynamics of a kinase and its cognate substrate underlies Arabidopsis response to viral infection
Source: eLife. 2025 May 2;12:RP90309. doi: 10.7554/eLife.90309 (PMC12048157; doi:10.7554/eLife.90309)
Supplement: Figure 1—source data 6. [file elife-90309-fig1-data6.xlsx]

## Sheet: Feuil1
Foci area (% of Col-0 mean)				Statistical analysis
Col0	cpk3/CPK3	cpk3/CPK3_K107M		ANOVA summary
317.051	38.6272	62.3011		F	17.43
293.892	35.1282	106.126		P value	<0,0001
72.4071	206.32	85.9413		P value summary	****
12.6072	87.9638	9.83967		Significant diff. among means (P < 0.05)?	Yes
14.2252	252.103	694.289		R squared	0.03777
123.035	29.2864	213.611
381.135	23.266	214.248		Brown-Forsythe test
155.368	91.837	142.886		F (DFn, DFd)	10,94 (2, 888)
56.8234	41.4419	50.2467		P value	<0,0001
48.0118	124.67	7.86432		P value summary	****
55.5626	222.78	91.2471		Are SDs significantly different (P < 0.05)?	Yes
49.5523	284.022	82.3074
75.1544	395.448	14.387		Bartlett's test
16.1972	96.9203	50.4557		Bartlett's statistic (corrected)	34.92
121.076	267.872	47.2972		P value	<0,0001
150.201	48.75	241.313		P value summary	****
344.989	102.469	216.449		Are SDs significantly different (P < 0.05)?	Yes
268.88	108.129	185.764
14.8387	28.9021	222.362		ANOVA table	SS	DF	MS	F (DFn, DFd)	P value
362.052	52.9131	205.399		Treatment (between columns)	490790	2	245395	F (2, 888) = 17,43	P<0,0001
10.9892	36.6957	15.8938		Residual (within columns)	12503372	888	14080
49.0265	91.7224	75.3162		Total	12994162	890
64.7113	43.1813	258.64
46.8017	402.988	91.8066		Data summary
41.0442	213.931	133.242		Number of treatments (columns)	3
45.2207	33.2506	63.1674		Number of values (total)	891
39.0789	42.9892	8.55873
275.019	47.668	112.548		Number of families	1
119.991	91.9651	110.232		Number of comparisons per family	3
29.846	26.111	76.2566		Alpha	0.05
44.9814	105.86	196.059
214.204	25.5515	75.5791		Tukey's multiple comparisons test	Mean Diff,	95,00% CI of diff,	Below threshold?	Summary	Adjusted P Value
8.57559	131.128	372.172		Col0 vs. cpk3/CPK3	-5.429	-28,46 to 17,60	No	ns	0.8447
171.535	498.547	33.5742		Col0 vs. cpk3/CPK3_K107M	-55.38	-80,87 to -29,89	Yes	****	<0,0001
49.4512	171.808	158.76		cpk3/CPK3 vs. cpk3/CPK3_K107M	-49.95	-72,23 to -27,68	Yes	****	<0,0001
22.5952	18.4928	39.77
16.386	275.578	533.298		Test details	Mean 1	Mean 2	Mean Diff,	SE of diff,	n1	n2	q	DF
14.0634	28.6224	407.452		Col0 vs. cpk3/CPK3	100	105.4	-5.429	9.808	227	412	0.7828	888
95.1843	18.4726	462.498		Col0 vs. cpk3/CPK3_K107M	100	155.4	-55.38	10.86	227	252	7.213	888
7.75645	401.381	288.236		cpk3/CPK3 vs. cpk3/CPK3_K107M	105.4	155.4	-49.95	9.489	412	252	7.445	888
36.9047	18.1321	422.455
160.836	81.4512	256.721
21.5704	101.228	290.95
102.964	131.128	597.126
30.6045	263.146	460.459
43.451	10.7397	215.728
23.4008	28.9359	90.074
32.9	8.54188	281.036
29.5999	66.1035	359.854
277.678	84.1243	336.767
34.1271	30.3213	42.1597
152.365	217.366	67.9055
289.723	17.7916	19.336
80.5074	91.3819	13.4636
43.4948	266.2	21.0744
15.5567	7.21374	180.128
24.7964	21.4491	76.8222
154.854	28.7235	27.6697
221.928	49.7343	76.7152
12.8063	34.154	67.936
47.4644	22.7502	6.66519
9.33171	69.0968	31.4107
186.569	24.7559	33.4373
15.8921	94.8303	6.0275
9.09148	91.3516	159.58
243.799	112.484	8.75953
425.087	264.009	54.6559
110.292	103.676	93.5726
22.1904	100.119	52.127
82.4654	30.9449	139.082
29.5391	22.4806	95.811
95.1166	33.6989	279.877
62.3562	32.2596	127.759
38.2441	11.7881	23.481
146.138	15.8062	10.0327
96.8637	142.626	37.3443
7.73529	80.7197	40.6813
64.7061	200.525	20.0087
227.953	36.753	68.4471
92.2797	92.0561	19.644
8.84033	93.8865	177.499
143.075	366.013	47.1696
143.179	53.503	93.7713
310.785	212.31	49.218
151.598	194.066	78.3269
52.1291	61.1449	172.539
75.5337	88.3953	22.5638
108.969	354.077	32.1336
36.3375	119.846	118.622
138.384	95.7304	76.9817
176.953	333.369	120.875
126.464	72.2453	31.6509
16.9534	252.265	94.171
50.2838	80.8444	56.0361
93.566	226.586	27.3269
49.2879	90.9336	29.7793
30.1572	139.229	95.4529
120.567	531.481	151.948
31.4762	34.2781	55.9531
16.5582	65.1494	33.7169
6.85082	310.036	100.563
17.9733	139.484	49.4102
35.1582	28.9735	96.7916
87.6259	83.625	16.9098
23.5051	137.683	103.806
8.83597	97.6171	116.414
27.364	38.6022	25.927
441.241	57.5998	223.852
19.1177	88.4143	153.053
9.39504	87.5429	23.6055
80.3339	52.638	70.2509
36.9556	6.21313	101.771
177.217	45.4945	29.0827
8.63723	78.209	263.129
36.0667	130.502	45.8243
16.3551	67.1498	145.824
32.7844	125.802	215.367
14.7892	55.6736	117.953
55.1538	253.006	143.173
30.3362	84.4352	48.0606
12.3324	15.5863	90.0107
40.144	6.556	46.8813
87.58	5.22165	94.8851
140.799	13.7147	126.68
111.376	44.7258	30.1309
94.4701	237.842	53.018
54.5947	59.5478	6.48393
9.85802	13.6318	129.362
36.8114	4.74338	246.007
18.587	13.92	106.606
5.06004	42.1685	106.398
113.114	38.0934	451.195
443.002	11.0657	85.0183
37.7483	14.0969	62.3038
169.975	40.1637	192.07
106.51	52.8695	207.582
48.8446	6.57129	114.055
97.1432	38.3816	367.287
403.441	55.6998	230.275
84.3566	128.709	71.544
138.056	54.4965	133.941
145.132	56.5559	65.2135
112.203	252.083	41.6016
95.8045	14.5359	144.51
151.814	41.118	34.3913
160.546	29.1002	117.047
198.503	23.4177	85.0404
135.745	10.7447	162.998
153.424	168.779	41.0427
85.0118	19.7422	196.742
372.353	9.23998	146.109
240.15	27.9755	28.6807
89.8709	33.5793	102.156
70.8865	70.9323	33.0854
52.1881	10.4236	50.9424
51.9719	5.57107	571.826
158.373	169.296	280.471
122.723	50.7249	443.441
21.1273	191.26	85.9811
14.4427	58.897	85.5606
131.418	68.1828	274.754
184.784	73.8631	39.4657
62.4744	69.0127	106.959
16.4127	30.0458	169.195
222.866	97.0886	153.967
247.944	170.698	36.4056
244.696	69.7203	13.8174
114.673	37.5146	12.2569
329.449	86.3396	183.168
188.624	11.6379	141.588
25.6538	24.6844	94.691
38.0214	159.84	60.7258
57.7321	19.3055	149.872
54.5392	46.6673	184.424
22.472	168.318	449.777
44.3574	144.647	689.022
221.864	68.1173	378.028
81.1946	147.726	24.7075
24.8791	64.4615	218.279
291.532	75.6582	38.8404
829.377	34.9966	25.6815
33.5945	20.1441	311.653
59.6688	19.4496	235.787
116.156	146.359	70.7969
21.083	170.146	53.925
46.5597	38.8075	395.05
78.4388	32.3192	116.599
185.171	64.3982	57.9811
50.389	250.814	189.017
47.6775	54.8568	208.822
14.3763	100.469	62.4965
25.3052	43.5618	268.308
65.4681	65.8461	96.7717
31.6799	9.67239	81.3938
15.2727	32.7582	66.4475
19.755	107.047	388.177
35.4925	30.9652	75.3843
37.3518	19.5697	433.414
220.343	70.9105	250.196
80.4309	30.5	66.8404
44.8443	34.6887	558.983
70.2436	95.0074	18.9471
96.0191	47.7352	18.3716
68.9874	48.849	38.1487
14.9795	76.558	304.802
20.4854	7.77897	201.196
33.7328	72.627	12.351
68.6222	309.252	84.7084
34.1313	87.0362	18.9415
36.6878	181.013	260.339
173.097	90.5086	259.941
21.2988	120.489	62.0538
33.0411	90.917	67.0673
26.6443	138.571	91.0112
152.158	310.768	39.1281
85.5661	83.2166	531.447
48.7123	370.198	93.125
218.92	91.7731	110.755
57.9811	54.8568	187.091
28.9131	214.99	204.19
46.0341	64.9922	397.158
297.57	112.95	318.785
261.352	224.005	221.018
85.6381	29.5992	111.956
69.3139	73.5527	408.778
69.5795	81.9416	89.5005
80.7021	38.3589	18.2332
	27.2253	83.5187
	164.929	82.3511
	410.521	12.9763
	56.974	105.138
	50.1843	310.795
	105.791	53.272
	96.7938	58.1526
	355.838	493.957
	94.7685	25.8917
	103.34	191.053
	134.373	152.672
	12.8656	444.852
	31.5028	434.941
	40.0688	260.738
	26.0245	229.169
	90.1258	195.458
	117.296	407.185
	41.751	393.622
	281.063	497.88
	26.0356	346.824
	175.841	209.364
	78.1898	255.968
	299.014	541.369
	29.4498	272.657
	298.925	498.699
	42.3985
	671.27
	58.1803
	37.1581
	27.8562
	45.7186
	71.306
	33.9487
	43.8649
	151.383
	28.083
	32.3052
	16.3684
	13.5463
	108.381
	64.461
	60.5764
	43.7321
	74.2554
	126.343
	319.184
	30.9882
	128.413
	12.5668
	88.095
	58.2301
	156.535
	55.5518
	21.7305
	15.234
	45.3534
	21.2269
	201.373
	44.457
	27.3692
	144.892
	37.6285
	69.3693
	71.223
	232.594
	20.8396
	75.3234
	80.4863
	45.7463
	191.485
	236.595
	408.756
	49.3321
	26.9819
	21.166
	29.4941
	18.9415
	278.202
	192.503
	48.2918
	13.8672
	30.623
	63.9851
	184.712
	76.1424
	46.1779
	55.0594
	70.3985
	40.9099
	370.713
	28.3431
	74.8641
	29.6158
	28.9186
	88.4823
	18.5542
	142.457
	139.021
	34.419
	19.8767
	195.613
	267.445
	46.3329
	29.5771
	20.4024
	401.004
	23.9937
	30.717
	113.671
	16.6395
	94.1653
	19.7273
	33.2791
	19.1961
	48.4024
	16.1581
	19.1075
	174.403
	77.9076
	120.92
	259.449
	64.0183
	47.5226
	187.324
	320.268
	49.404
	42.072
	96.0855
	247.894
	30.5953
	171.426
	17.3257
	80.038
	236.556
	13.7731
	13.3471
	118.126
	41.7953
	15.3447
	144.123
	43.9257
	145.606
	129.719
	16.1913
	225.041
	190.101
	77.3764
	278.423
	17.0712
	97.5796
	23.0973
	76.4855
	212.518
	70.7914
	14.6364
	75.2183
	58.4183
	88.6815
	544.081
	19.6111
	169.135
	400.434
	250.207
	72.2799
	58.9882
	34.5574
	201.075
	43.5384
	54.7661
	123.997
	78.7155
	169.821
	605.454
	189.742
	113.107
	368.09
	507.88
	295.295
	268.347
	330.506
	116.958
	81.427
	124.274
	182.93
	171.73
