# Supplementary material for: Interdependence of plasma membrane nanoscale dynamics of a kinase and its cognate substrate underlies Arabidopsis response to viral infection
Source: eLife. 2025 May 2;12:RP90309. doi: 10.7554/eLife.90309 (PMC12048157; doi:10.7554/eLife.90309)
Supplement: Figure 2—source data 1. [file elife-90309-fig2-data1.xlsx]

## Sheet: Feuil1
Foci area (% of Col-0 mean)					Statistical analysis
Col-0	cpk3-2	cpk3-2/CPK3-mTagRFP1.2	cpk3-2/CPK3_G2A-mTagRFP1.2		ANOVA summary
75.1447	76.8751	89.4572	149.886		F	37.98
142.102	170.412	67.1818	196.053		P value	<0,0001
132.874	65.586	79.413	58.28		P value summary	****
117.186	240.049	150.693	11.5935		Significant diff. among means (P < 0.05)?	Yes
69.5018	217.417	116.682	52.911		R squared	0.1944
43.5045	100.062	221.307	54.7375
69.5675	80.0202	20.0948	239.136		Brown-Forsythe test
74.8499	91.2148	125.697	122.083		F (DFn, DFd)	23,33 (3, 472)
54.2521	48.9344	121.155	103.988		P value	<0,0001
74.0232	112.601	195.588	124.015		P value summary	****
67.052	149.008	97.2247	334.284		Are SDs significantly different (P < 0.05)?	Yes
12.0293	68.3578	62.1669	232.836
258.536	148.481	168.167	111.986		Bartlett's test
250.614	182.499	114.746	326.174		Bartlett's statistic (corrected)	86.8
74.5952	118.446	245.556	467.925		P value	<0,0001
224.963	104.648	87.682	329.678		P value summary	****
14.016	154.212	164.014	229.158		Are SDs significantly different (P < 0.05)?	Yes
233.354	140.398	198.314	351.242
23.3841	145.848	148.554	337.893		ANOVA table	SS	DF	MS	F (DFn, DFd)	P value
29.2065	60.0232	355.193	394.971		Treatment (between columns)	951302	3	317101	F (3, 472) = 37,98	P<0,0001
11.1161	63.9165	282.577	445.876		Residual (within columns)	3941147	472	8350
237.307	184.754	156.096	323.752		Total	4892449	475
29.2289	256.78	87.533	391.231
183.953	419.816	29.678	255.174		Data summary
61.0854	327.126	81.0712	388.754		Number of treatments (columns)	4
95.709	288.782	123.742	369.153		Number of values (total)	476
106.679	474.773	112.485	468.925
234.857	550.738	64.3395	121.825		Number of families	1
51.9593	116.389	36.3007	511.412		Number of comparisons per family	6
80.3647	391.116	44.5086	373.04		Alpha	0.05
40.4139	428.191	68.9062	323.729
44.4594	407.848	58.9351	361.134		Tukey's multiple comparisons test	Mean Diff,	95,00% CI of diff,	Below threshold?	Summary	Adjusted P Value
16.0412	343.967	107.25	140.236		Col-0 vs. cpk3-2	-102.6	-133,5 to -71,71	Yes	****	<0,0001
36.0703	217.893	59.6816	342.036		Col-0 vs. cpk3-2/CPK3-mTagRFP1.2	-2.313	-31,60 to 26,97	No	ns	0.997
137.107	259.008	38.3969	107.851		Col-0 vs. cpk3-2/CPK3_G2A-mTagRFP1.2	-78.71	-107,9 to -49,57	Yes	****	<0,0001
57.8907	370.078	38.5486	83.0889		cpk3-2 vs. cpk3-2/CPK3-mTagRFP1.2	100.3	67,70 to 132,8	Yes	****	<0,0001
285.687	300.606	14.8295	72.4021		cpk3-2 vs. cpk3-2/CPK3_G2A-mTagRFP1.2	23.87	-8,569 to 56,32	No	ns	0.2306
49.3157	425.394	40.894	110.442		cpk3-2/CPK3-mTagRFP1.2 vs. cpk3-2/CPK3_G2A-mTagRFP1.2	-76.4	-107,3 to -45,46	Yes	****	<0,0001
21.9791	393.325	38.3227	74.563
57.6988	135.928	160.46	45.2391		Test details	Mean 1	Mean 2	Mean Diff,	SE of diff,	n1	n2	q	DF
97.0182	124.321	86.6388	97.1931		Col-0 vs. cpk3-2	100	202.6	-102.6	11.97	148	96	12.12	472
139.868	47.0565	102.913	165.666		Col-0 vs. cpk3-2/CPK3-mTagRFP1.2	100	102.3	-2.313	11.36	148	115	0.2879	472
97.9099	60.603	39.7828	95.1361		Col-0 vs. cpk3-2/CPK3_G2A-mTagRFP1.2	100	178.7	-78.71	11.3	148	117	9.847	472
91.529	114.88	88.0755	214.213		cpk3-2 vs. cpk3-2/CPK3-mTagRFP1.2	202.6	102.3	100.3	12.63	96	115	11.23	472
53.2497	27.5892	81.086	210.387		cpk3-2 vs. cpk3-2/CPK3_G2A-mTagRFP1.2	202.6	178.7	23.87	12.58	96	117	2.683	472
53.4809	57.315	54.82	76.4843		cpk3-2/CPK3-mTagRFP1.2 vs. cpk3-2/CPK3_G2A-mTagRFP1.2	102.3	178.7	-76.4	12	115	117	9.004	472
79.2994	114.652	98.51	121.259
124.114	7.3649	142.439	107.092
92.3306	38.0746	91.0221	177.365
121.716	106.269	57.58	218.234
88.4201	169.439	35.7748	280.408
77.0102	55.8136	100.577	71.7829
58.2607	46.3153	134.891	94.0684
118.746	55.91	60.3686	167.698
34.1907	167.921	117.013	86.1808
50.3498	222.83	242.899	299.716
47.7043	254.114	253.074	176.052
21.5412	281.546	236.08	260.658
21.6685	356.56	173.533	211.505
74.8991	134.943	96.3815	223.111
124.498	284.738	119.835	391.723
40.2917	252.539	50.4809	281.412
156.438	152.784	44.8598	358.37
54.8561	131.183	64.1507	231.629
66.3403	238.07	57.3013	264.662
143.827	311.587	62.2495	48.9235
189.219	255.739	99.615	25.4371
266.62	341.335	136.738	179.707
162.213	164.44	120.233	65.5665
167.471	52.3856	12.2079	234.795
138.422	301.558	31.7879	172.929
159.46	115.129	134.118	169.056
138.96	195.308	10.2269	246.239
169.104	194.241	7.88889	265.514
99.2947	125.409	59.1806	274.81
219.543	158.102	44.7364	228.317
72.5805	220.561	39.5885	172.855
45.8897	205.059	133.882	146.001
91.288	267.277	10.2245	158.719
14.3982	309.033	85.3946	384.81
101.036	209.929	59.5788	128.417
47.9905	191.207	153.321	156.339
86.0687	139.756	112.574	215.182
162.715	323.088	120.029	168.639
83.116	419.611	220.312	119.284
33.5196	182.794	146.302	181.453
45.7251	379.086	160.028	50.3615
77.7466	272.386	86.5927	58.8412
187.499	227.692	114.981	75.969
18.3058	277.412	130.207	192.26
14.6197	181.764	104.186	63.6299
118.301	166.688	95.0407	34.1039
54.0944	231.238	28.2749	104.071
17.4405	223.478	203.358	83.6525
123.641	276.679	68.3232	103.123
24.6675	193.742	91.0012	53.3614
192.539		208.452	91.6831
133.496		109.819	133.619
139.184		50.1506	36.6039
87.2026		51.0485	21.0135
170.011		116.735	64.1417
181.497		74.6898	42.135
187.443		148.606	32.8933
64.1361		203.515	129.958
138.293		121.37	81.9205
61.8236		55.2186	53.2969
107.242		238.955	142.912
119.2		19.3257	93.731
132.494		78.2678	117.414
73.4276		37.9675	146.226
189.795		80.1186	96.1588
108.168		36.8751	125.639
73.8608		24.3467	202.457
52.2356		18.3611	39.7156
26.3027		106.436	69.0152
156.088			168.987
53.1972			36.5221
164.413
115.88
193.154
133.95
96.7382
121.825
76.2007
103.621
172.658
65.6766
95.1961
46.6257
170.748
47.9809
181.316
104.554
60.781
59.2425
97.6531
34.8946
88.5314
141.213
135.897
81.2546
79.3745
100.458
197.975
45.9329
34.2186
101.433
62.7782
