# Supplementary material for: Interdependence of plasma membrane nanoscale dynamics of a kinase and its cognate substrate underlies Arabidopsis response to viral infection
Source: eLife. 2025 May 2;12:RP90309. doi: 10.7554/eLife.90309 (PMC12048157; doi:10.7554/eLife.90309)
Supplement: Figure 2—source data 2. [file elife-90309-fig2-data2.xlsx]

## Sheet: Feuil1
Condition	Experiment	Cell	logD
GFP	1	Cell 1	-0.19509
GFP	1	Cell 1	-0.198128
GFP	1	Cell 1	-0.597463
GFP	1	Cell 1	-0.444716
GFP	1	Cell 1	-0.639484
GFP	1	Cell 1	-5
GFP	1	Cell 1	-5
GFP	1	Cell 1	-0.10061
GFP	1	Cell 1	-0.163576
GFP	1	Cell 1	-0.101972
GFP	1	Cell 1	-0.513088
GFP	1	Cell 1	-0.506098
GFP	1	Cell 1	-0.466076
GFP	1	Cell 1	-0.829922
GFP	1	Cell 1	-0.374431
GFP	1	Cell 1	-0.740838
GFP	1	Cell 1	0.0708993
GFP	1	Cell 1	0.0356168
GFP	1	Cell 1	0.0383086
GFP	1	Cell 1	-0.633532
GFP	1	Cell 1	0.155133
GFP	1	Cell 1	-5
GFP	1	Cell 1	-0.378829
GFP	1	Cell 1	-0.199254
GFP	1	Cell 1	-5
GFP	1	Cell 1	-5
GFP	1	Cell 1	-0.259844
GFP	1	Cell 1	0.248887
GFP	1	Cell 1	0.428272
GFP	1	Cell 1	-0.730292
GFP	1	Cell 1	-0.345342
GFP	1	Cell 1	-0.965946
GFP	1	Cell 1	-0.387617
GFP	1	Cell 1	-0.0838738
GFP	1	Cell 1	-0.443126
GFP	1	Cell 1	0.192211
GFP	1	Cell 1	-0.16487
GFP	1	Cell 1	-1.02453
GFP	1	Cell 1	-0.61866
GFP	1	Cell 1	-5
GFP	1	Cell 1	-0.517101
GFP	1	Cell 1	-0.745467
GFP	1	Cell 1	-0.208201
GFP	1	Cell 1	-0.0824796
GFP	1	Cell 1	-0.0724915
GFP	1	Cell 1	-0.176316
GFP	1	Cell 1	-0.113151
GFP	1	Cell 1	-0.13221
GFP	1	Cell 1	-0.293992
GFP	1	Cell 1	-0.131045
GFP	1	Cell 1	-0.576508
GFP	1	Cell 1	-0.350895
GFP	1	Cell 1	-0.166718
GFP	1	Cell 1	-0.155986
GFP	1	Cell 1	-0.180073
GFP	1	Cell 1	-0.234877
GFP	1	Cell 1	-1.18159
GFP	1	Cell 1	-0.700049
GFP	1	Cell 1	-0.225079
GFP	1	Cell 1	-1.04992
GFP	1	Cell 1	-0.0294799
GFP	1	Cell 1	0.0785853
GFP	1	Cell 1	0.0889915
GFP	1	Cell 1	-5
GFP	1	Cell 1	-0.547285
GFP	1	Cell 1	-0.614142
GFP	1	Cell 1	-0.239439
GFP	1	Cell 1	-0.138705
GFP	1	Cell 1	-0.398644
GFP	1	Cell 1	-0.169953
GFP	1	Cell 1	0.162568
GFP	1	Cell 1	0.138786
GFP	1	Cell 1	0.171706
GFP	1	Cell 1	0.188392
GFP	1	Cell 1	0.094621
GFP	1	Cell 1	0.135188
GFP	1	Cell 1	0.211863
GFP	1	Cell 1	-1.49104
GFP	1	Cell 1	-0.551876
GFP	1	Cell 1	-0.829103
GFP	1	Cell 1	-5
GFP	1	Cell 1	-0.727828
GFP	1	Cell 1	-0.520166
GFP	1	Cell 1	-0.133188
GFP	1	Cell 1	-0.030139
GFP	1	Cell 1	-0.0963413
GFP	1	Cell 1	-5
GFP	1	Cell 1	-0.543307
GFP	1	Cell 1	-0.493315
GFP	1	Cell 1	-1.65442
GFP	1	Cell 1	-1.21973
GFP	1	Cell 1	0.250224
GFP	1	Cell 1	0.302499
GFP	1	Cell 1	-0.155677
GFP	1	Cell 1	-0.191223
GFP	1	Cell 1	-0.222922
GFP	1	Cell 1	-0.251673
GFP	1	Cell 1	-0.272991
GFP	1	Cell 1	-0.0434363
GFP	1	Cell 1	0.0123689
GFP	1	Cell 1	-0.247424
GFP	1	Cell 1	-0.989128
GFP	1	Cell 1	-0.803653
GFP	1	Cell 1	-0.840528
GFP	1	Cell 1	-0.767243
GFP	1	Cell 1	-0.799417
GFP	1	Cell 1	-5
GFP	1	Cell 1	-1.15858
GFP	1	Cell 1	-0.110605
GFP	1	Cell 1	-0.180939
GFP	1	Cell 1	-1.01794
GFP	1	Cell 1	-0.831259
GFP	1	Cell 1	-0.306287
GFP	1	Cell 1	-0.575435
GFP	1	Cell 1	-0.18696
GFP	1	Cell 1	-0.0830518
GFP	1	Cell 1	-0.0514848
GFP	1	Cell 1	-0.192714
GFP	1	Cell 1	-0.0993697
GFP	1	Cell 1	-0.11551
GFP	1	Cell 1	-0.18588
GFP	1	Cell 1	-0.18666
GFP	1	Cell 1	-0.461005
GFP	1	Cell 1	-0.660935
GFP	1	Cell 1	-0.615492
GFP	1	Cell 1	-0.241961
GFP	1	Cell 1	0.341583
GFP	1	Cell 1	-5
GFP	1	Cell 1	-0.347816
GFP	1	Cell 1	-0.314444
GFP	1	Cell 1	-0.448541
GFP	1	Cell 1	-0.233471
GFP	1	Cell 1	0.105164
GFP	1	Cell 1	-0.625731
GFP	1	Cell 1	-0.0384083
GFP	1	Cell 1	-0.557178
GFP	1	Cell 1	-5
GFP	1	Cell 1	-0.559784
GFP	1	Cell 1	-0.679486
GFP	1	Cell 1	-0.0320895
GFP	1	Cell 1	-1.77202
GFP	1	Cell 1	-0.334551
GFP	1	Cell 1	-0.314954
GFP	1	Cell 1	-0.542141
GFP	1	Cell 1	-0.198206
GFP	1	Cell 1	-0.120776
GFP	1	Cell 1	-5
GFP	1	Cell 1	0.0111248
GFP	1	Cell 1	0.0210443
GFP	1	Cell 1	-0.937009
GFP	1	Cell 1	-0.731114
GFP	1	Cell 1	-0.740631
GFP	1	Cell 1	-0.593715
GFP	1	Cell 1	0.0797475
GFP	1	Cell 1	-0.727638
GFP	1	Cell 1	-0.232485
GFP	1	Cell 1	-1.05598
GFP	1	Cell 1	-0.782053
GFP	1	Cell 1	-0.320536
GFP	1	Cell 1	-0.753874
GFP	1	Cell 1	-0.772949
GFP	1	Cell 1	-0.245372
GFP	1	Cell 1	-0.500267
GFP	1	Cell 1	-0.936366
GFP	1	Cell 1	-0.67192
GFP	1	Cell 1	-0.528892
GFP	1	Cell 1	-0.637501
GFP	1	Cell 1	-0.601521
GFP	1	Cell 1	-0.565996
GFP	1	Cell 1	-0.154851
GFP	1	Cell 1	-0.201068
GFP	1	Cell 1	-0.0138751
GFP	1	Cell 1	-0.274645
GFP	1	Cell 1	-0.164225
GFP	1	Cell 1	-0.208527
GFP	1	Cell 1	0.194484
GFP	1	Cell 1	0.0954668
GFP	1	Cell 1	-0.790041
GFP	1	Cell 1	-0.518836
GFP	1	Cell 1	-0.358591
GFP	1	Cell 1	-0.795138
GFP	1	Cell 1	-0.162592
GFP	1	Cell 1	-0.162757
GFP	1	Cell 1	-0.305715
GFP	1	Cell 1	-0.0476087
GFP	1	Cell 1	-3.45398
GFP	1	Cell 1	-0.734769
GFP	1	Cell 1	-0.696001
GFP	1	Cell 1	-0.606265
GFP	1	Cell 1	-0.506634
GFP	1	Cell 1	-0.399885
GFP	1	Cell 1	-0.587522
GFP	1	Cell 1	0.179757
GFP	1	Cell 1	0.182468
GFP	1	Cell 1	0.164305
GFP	1	Cell 1	0.123857
GFP	1	Cell 1	-0.0275017
GFP	1	Cell 1	-0.064026
GFP	1	Cell 1	0.0107786
GFP	1	Cell 1	-0.0662416
GFP	1	Cell 1	-0.902493
GFP	1	Cell 1	-2.76379
GFP	1	Cell 1	-0.424354
GFP	1	Cell 1	-0.294557
GFP	1	Cell 1	-0.171273
GFP	1	Cell 1	-0.120069
GFP	1	Cell 1	-0.175898
GFP	1	Cell 1	-0.194454
GFP	1	Cell 1	-0.171033
GFP	1	Cell 1	-2.3573
GFP	1	Cell 1	-0.290138
GFP	1	Cell 1	-0.447518
GFP	1	Cell 1	-0.110587
GFP	1	Cell 1	-0.0612153
GFP	1	Cell 1	-0.0942767
GFP	1	Cell 1	-1.06393
GFP	1	Cell 1	-1.19897
GFP	1	Cell 1	-0.798236
GFP	1	Cell 1	-0.127708
GFP	1	Cell 1	-0.61319
GFP	1	Cell 1	-5
GFP	1	Cell 1	-0.159862
GFP	1	Cell 1	-5
GFP	1	Cell 1	0.227168
GFP	1	Cell 1	-0.0940823
GFP	1	Cell 1	-0.0963206
GFP	1	Cell 1	-5
GFP	1	Cell 1	-1.15008
GFP	1	Cell 1	-1.19249
GFP	1	Cell 1	-3.36775
GFP	1	Cell 1	-1.08903
GFP	1	Cell 1	-0.789431
GFP	1	Cell 1	-5
GFP	1	Cell 1	-1.01755
GFP	1	Cell 1	-1.19476
GFP	1	Cell 1	-0.209898
GFP	1	Cell 1	-0.108354
GFP	1	Cell 1	-0.119727
GFP	1	Cell 1	0.224919
GFP	1	Cell 1	0.175945
GFP	1	Cell 1	-0.147848
GFP	1	Cell 1	0.0112787
GFP	1	Cell 1	-0.145821
GFP	1	Cell 1	0.0286672
GFP	1	Cell 1	-0.133219
GFP	1	Cell 1	0.0113735
GFP	1	Cell 1	-0.0465883
GFP	1	Cell 1	-0.0412062
GFP	1	Cell 1	-0.145265
GFP	1	Cell 1	-0.0369465
GFP	1	Cell 1	0.156731
GFP	1	Cell 1	-1.06483
GFP	1	Cell 1	-0.396697
GFP	1	Cell 1	-1.16157
GFP	1	Cell 1	-0.610564
GFP	1	Cell 1	-0.163052
GFP	1	Cell 1	-0.20603
GFP	1	Cell 1	-0.13353
GFP	1	Cell 1	-0.299754
GFP	1	Cell 1	-0.298086
GFP	1	Cell 1	-0.596784
GFP	1	Cell 1	-0.240455
GFP	1	Cell 1	-0.564393
GFP	1	Cell 1	-0.0688526
GFP	1	Cell 1	-0.484939
GFP	1	Cell 1	-5
GFP	1	Cell 1	-0.803691
GFP	1	Cell 1	-0.417256
GFP	1	Cell 1	-0.547497
GFP	1	Cell 1	-1.66326
GFP	1	Cell 1	-0.498823
GFP	1	Cell 1	-0.974575
GFP	1	Cell 1	-1.34454
GFP	1	Cell 1	-0.460008
GFP	1	Cell 1	-0.270561
GFP	1	Cell 1	-0.523207
GFP	1	Cell 1	-0.536906
GFP	1	Cell 1	-0.563619
GFP	1	Cell 1	-0.653029
GFP	1	Cell 1	-0.225747
GFP	1	Cell 1	-0.327896
GFP	1	Cell 1	-0.885726
GFP	1	Cell 1	-0.629183
GFP	1	Cell 1	-0.456315
GFP	1	Cell 1	0.071652
GFP	1	Cell 1	0.0406565
GFP	1	Cell 1	0.0459242
GFP	1	Cell 1	-0.246808
GFP	1	Cell 1	-1.09284
GFP	1	Cell 1	-0.806703
GFP	1	Cell 1	-0.736734
GFP	1	Cell 1	-5
GFP	1	Cell 1	-0.688321
GFP	1	Cell 1	-0.254737
GFP	1	Cell 1	-0.14674
GFP	1	Cell 1	-0.0957305
GFP	1	Cell 1	-0.146378
GFP	1	Cell 1	-0.12765
GFP	1	Cell 1	0.0479094
GFP	1	Cell 1	-5
GFP	1	Cell 1	-0.0101797
GFP	1	Cell 1	-0.00468529
GFP	1	Cell 1	-0.0900697
GFP	1	Cell 1	-0.0143416
GFP	1	Cell 1	-0.0144681
GFP	1	Cell 1	0.0150154
GFP	1	Cell 1	0.0214348
GFP	1	Cell 1	-0.0631723
GFP	1	Cell 1	-0.141657
GFP	1	Cell 1	-0.403285
GFP	1	Cell 1	-0.161488
GFP	1	Cell 1	-0.108031
GFP	1	Cell 1	-0.768351
GFP	1	Cell 1	-5
GFP	1	Cell 1	-1.00392
GFP	1	Cell 1	-0.810729
GFP	1	Cell 1	-0.845063
GFP	1	Cell 1	0.404052
GFP	1	Cell 1	-0.265117
GFP	1	Cell 1	-0.285679
GFP	1	Cell 1	-0.288038
GFP	1	Cell 1	-0.190541
GFP	1	Cell 1	-0.266983
GFP	1	Cell 1	-0.857128
GFP	1	Cell 1	-0.667175
GFP	1	Cell 1	0.113333
GFP	1	Cell 1	0.0987396
GFP	1	Cell 1	0.114103
GFP	1	Cell 1	0.13291
GFP	1	Cell 1	-0.0245031
GFP	1	Cell 1	-0.187715
GFP	1	Cell 1	-0.654526
GFP	1	Cell 1	0.130099
GFP	1	Cell 1	-1.07243
GFP	1	Cell 1	-0.732673
GFP	1	Cell 1	-0.684251
GFP	1	Cell 1	-0.572213
GFP	1	Cell 1	-0.663906
GFP	1	Cell 1	-0.120644
GFP	1	Cell 1	-0.0802859
GFP	1	Cell 1	-0.736505
GFP	1	Cell 1	-0.709893
GFP	1	Cell 1	-1.29586
GFP	1	Cell 1	-0.600613
GFP	1	Cell 1	-1.47126
GFP	1	Cell 1	-0.650316
GFP	1	Cell 1	-0.821828
GFP	1	Cell 1	-1.50117
GFP	1	Cell 1	-0.500257
GFP	1	Cell 1	0.136542
GFP	1	Cell 1	0.116997
GFP	1	Cell 1	-0.49813
GFP	1	Cell 1	-0.358186
GFP	1	Cell 1	-5
GFP	1	Cell 1	-2.02106
GFP	1	Cell 1	0.0548742
GFP	1	Cell 1	-0.847286
GFP	1	Cell 1	-0.0729422
GFP	1	Cell 1	-0.0548829
GFP	1	Cell 1	-0.707787
GFP	1	Cell 1	-0.395343
GFP	1	Cell 1	-0.381485
GFP	1	Cell 1	0.325686
GFP	1	Cell 1	0.25578
GFP	1	Cell 1	0.0461941
GFP	1	Cell 1	0.0332682
GFP	1	Cell 1	-5
GFP	1	Cell 1	-0.917456
GFP	1	Cell 1	-0.258318
GFP	1	Cell 1	0.184189
GFP	1	Cell 1	-1.97428
GFP	1	Cell 1	-5
GFP	1	Cell 1	0.0208313
GFP	1	Cell 1	-5
GFP	1	Cell 1	-5
GFP	1	Cell 1	-0.254535
GFP	1	Cell 1	0.0888284
GFP	1	Cell 1	0.0375835
GFP	1	Cell 1	0.0313493
GFP	1	Cell 1	-0.356815
GFP	1	Cell 1	-0.455761
GFP	1	Cell 1	-0.529265
GFP	1	Cell 1	-0.401361
GFP	1	Cell 1	-0.660554
GFP	1	Cell 1	-0.56228
GFP	1	Cell 1	0.616458
GFP	1	Cell 1	0.596511
GFP	1	Cell 1	0.613637
GFP	1	Cell 1	0.602317
GFP	1	Cell 1	0.581513
GFP	1	Cell 1	0.617423
GFP	1	Cell 1	-0.243545
GFP	1	Cell 1	-0.128866
GFP	1	Cell 1	-0.264872
GFP	1	Cell 1	-0.690561
GFP	1	Cell 1	-5
GFP	1	Cell 1	-0.471856
GFP	1	Cell 1	-0.518055
GFP	1	Cell 1	-5
GFP	1	Cell 1	0.0732305
GFP	1	Cell 1	-1.00618
GFP	1	Cell 1	-2.85294
GFP	1	Cell 1	-0.0218587
GFP	1	Cell 1	-0.00664122
GFP	1	Cell 1	0.0475581
GFP	1	Cell 1	-0.26932
GFP	1	Cell 1	-0.430751
GFP	1	Cell 1	-0.303704
GFP	1	Cell 1	-0.253503
GFP	1	Cell 1	-0.462486
GFP	1	Cell 1	-0.279193
GFP	1	Cell 1	-0.341356
GFP	1	Cell 1	-0.382096
GFP	1	Cell 1	-5
GFP	1	Cell 1	0.179504
GFP	1	Cell 1	0.0276281
GFP	1	Cell 1	0.00927743
GFP	1	Cell 1	-0.714118
GFP	1	Cell 1	-0.732076
GFP	1	Cell 1	-0.460021
GFP	1	Cell 1	-1.06982
GFP	1	Cell 1	-1.4401
GFP	1	Cell 1	-0.339309
GFP	1	Cell 1	-0.235672
GFP	1	Cell 1	-5
GFP	1	Cell 1	-5
GFP	1	Cell 1	-0.0516237
GFP	1	Cell 1	-0.000241632
GFP	1	Cell 1	-0.0236962
GFP	1	Cell 1	-1.46244
GFP	1	Cell 1	-0.506567
GFP	1	Cell 1	-0.457756
GFP	1	Cell 1	-0.384068
GFP	1	Cell 1	-0.332819
GFP	1	Cell 1	-0.140359
GFP	1	Cell 1	-0.116092
GFP	1	Cell 1	-0.47389
GFP	1	Cell 1	-0.410441
GFP	1	Cell 1	-0.411773
GFP	1	Cell 1	-0.330967
GFP	1	Cell 1	-0.366052
GFP	1	Cell 1	-0.340299
GFP	1	Cell 1	-0.189849
GFP	1	Cell 1	-0.432842
GFP	1	Cell 1	-0.0564324
GFP	1	Cell 1	-0.0475935
GFP	1	Cell 1	-0.0124616
GFP	1	Cell 1	0.00761828
GFP	1	Cell 1	-0.013782
GFP	1	Cell 1	-1.65856
GFP	1	Cell 1	-0.196008
GFP	1	Cell 1	-0.360579
GFP	1	Cell 1	-0.686886
GFP	1	Cell 1	-0.124367
GFP	1	Cell 1	-0.127288
GFP	1	Cell 1	-0.198338
GFP	1	Cell 1	-0.359983
GFP	1	Cell 1	-0.812298
GFP	1	Cell 1	-0.272138
GFP	1	Cell 1	0.43395
GFP	1	Cell 1	0.424747
GFP	1	Cell 1	0.147486
GFP	1	Cell 1	0.149609
GFP	1	Cell 1	-0.301182
GFP	1	Cell 1	-0.281304
GFP	1	Cell 1	-0.499067
GFP	1	Cell 1	-0.599501
GFP	1	Cell 1	-1.03625
GFP	1	Cell 1	-0.194686
GFP	1	Cell 1	-0.069775
GFP	1	Cell 1	-0.0784439
GFP	1	Cell 1	-0.444081
GFP	1	Cell 1	-0.337968
GFP	1	Cell 1	-0.433967
GFP	1	Cell 1	-0.401395
GFP	1	Cell 1	-5
GFP	1	Cell 1	-1.10541
GFP	1	Cell 1	-0.634766
GFP	1	Cell 1	-5
GFP	1	Cell 1	-5
GFP	1	Cell 1	-1.6918
GFP	1	Cell 1	-0.773449
GFP	1	Cell 1	0.160261
GFP	1	Cell 1	0.0410543
GFP	1	Cell 1	-0.260699
GFP	1	Cell 1	-0.304451
GFP	1	Cell 1	-0.234093
GFP	1	Cell 1	-0.311297
GFP	1	Cell 1	-0.354895
GFP	1	Cell 1	-0.245431
GFP	1	Cell 1	-0.284187
GFP	1	Cell 1	-0.457351
GFP	1	Cell 1	-0.00982865
GFP	1	Cell 1	-0.0744262
GFP	1	Cell 1	-0.00663084
GFP	1	Cell 1	-0.152811
GFP	1	Cell 1	-0.165802
GFP	1	Cell 1	-0.125533
GFP	1	Cell 1	-0.147788
GFP	1	Cell 1	-5
GFP	1	Cell 1	-5
GFP	1	Cell 1	0.487091
GFP	1	Cell 1	0.472524
GFP	1	Cell 1	0.445126
GFP	1	Cell 1	-0.604968
GFP	1	Cell 1	-0.155016
GFP	1	Cell 1	-0.394044
GFP	1	Cell 1	-0.18272
GFP	1	Cell 1	-1.27737
GFP	1	Cell 1	-0.812829
GFP	1	Cell 1	-1.85715
GFP	1	Cell 1	-5
GFP	1	Cell 1	-1.54477
GFP	1	Cell 1	-0.0186379
GFP	1	Cell 1	-0.0470602
GFP	1	Cell 1	-1.93581
GFP	1	Cell 1	-0.898839
GFP	1	Cell 1	0.30959
GFP	1	Cell 1	0.00787412
GFP	1	Cell 1	-0.0427776
GFP	1	Cell 1	0.272177
GFP	1	Cell 1	0.27634
GFP	1	Cell 1	0.279411
GFP	1	Cell 1	-2.40731
GFP	1	Cell 1	-5
GFP	1	Cell 1	-5
GFP	1	Cell 1	-0.407248
GFP	1	Cell 1	-0.856957
GFP	1	Cell 1	-0.463528
GFP	1	Cell 1	-5
GFP	1	Cell 1	0.00563496
GFP	1	Cell 1	0.063684
GFP	1	Cell 1	0.0572126
GFP	1	Cell 1	-0.720166
GFP	1	Cell 1	-0.231403
GFP	1	Cell 1	-0.446256
GFP	1	Cell 1	0.0824445
GFP	1	Cell 1	-0.049222
GFP	1	Cell 1	-0.176063
GFP	1	Cell 1	-1.33208
GFP	1	Cell 1	0.201908
GFP	1	Cell 1	0.262209
GFP	1	Cell 1	0.179713
GFP	1	Cell 1	0.242244
GFP	1	Cell 1	-1.54148
GFP	1	Cell 1	-0.971705
GFP	1	Cell 1	-5
GFP	1	Cell 1	-3.1027
GFP	1	Cell 1	-0.873832
GFP	1	Cell 1	-0.0927207
GFP	1	Cell 1	-0.103452
GFP	1	Cell 1	-0.168023
GFP	1	Cell 1	-0.206282
GFP	1	Cell 1	-0.191906
GFP	1	Cell 1	-0.22487
GFP	1	Cell 1	-5
GFP	1	Cell 1	-5
GFP	1	Cell 1	-0.722583
GFP	1	Cell 1	-0.454108
GFP	1	Cell 1	-0.348893
GFP	1	Cell 1	-1.00464
GFP	1	Cell 1	-0.486163
GFP	1	Cell 1	0.0277807
GFP	1	Cell 1	-0.465405
GFP	1	Cell 1	-0.146265
GFP	1	Cell 1	-0.417898
GFP	1	Cell 1	-0.161112
GFP	1	Cell 1	-0.794992
GFP	1	Cell 1	-0.660236
GFP	1	Cell 1	-0.64467
GFP	1	Cell 1	-0.976541
GFP	1	Cell 1	-5
GFP	1	Cell 1	-0.483617
GFP	1	Cell 1	-0.370355
GFP	1	Cell 1	-0.956824
GFP	1	Cell 1	-2.35243
GFP	1	Cell 1	-5
GFP	1	Cell 1	-5
GFP	1	Cell 1	-0.52588
GFP	1	Cell 1	-0.901933
GFP	1	Cell 1	-0.436095
GFP	1	Cell 1	-2.06087
GFP	1	Cell 1	0.319945
GFP	1	Cell 1	0.302052
GFP	1	Cell 1	-0.394909
GFP	1	Cell 1	-0.307235
GFP	1	Cell 1	-0.544622
GFP	1	Cell 1	-0.152341
GFP	1	Cell 1	0.0559354
GFP	1	Cell 1	0.00472606
GFP	1	Cell 1	0.029538
GFP	1	Cell 1	-0.639706
GFP	1	Cell 1	-0.683155
GFP	1	Cell 1	-0.889064
GFP	1	Cell 1	-0.647625
GFP	1	Cell 1	-0.394334
GFP	1	Cell 1	-0.559864
GFP	1	Cell 1	-0.404805
GFP	1	Cell 1	-0.285958
GFP	1	Cell 1	-0.414892
GFP	1	Cell 1	0.05727
GFP	1	Cell 1	-0.592901
GFP	1	Cell 1	-0.460964
GFP	1	Cell 1	-0.495872
GFP	1	Cell 1	-0.448098
GFP	1	Cell 1	-0.171381
GFP	1	Cell 1	-0.789752
GFP	1	Cell 1	-5
GFP	1	Cell 1	-0.215298
GFP	1	Cell 1	-0.775364
GFP	1	Cell 1	-0.776786
GFP	1	Cell 1	-1.08343
GFP	1	Cell 1	-0.421528
GFP	1	Cell 1	-0.716819
GFP	1	Cell 1	-0.117123
GFP	1	Cell 1	-0.184502
GFP	1	Cell 1	-0.166839
GFP	1	Cell 1	-0.11051
GFP	1	Cell 1	-0.140744
GFP	1	Cell 1	-0.0924855
GFP	1	Cell 1	-0.133026
GFP	1	Cell 1	-1.48922
GFP	1	Cell 1	-5
GFP	1	Cell 1	-0.572749
GFP	1	Cell 1	-0.522091
GFP	1	Cell 1	-0.470794
GFP	1	Cell 1	-0.594269
GFP	1	Cell 1	-0.503595
GFP	1	Cell 1	-0.0838163
GFP	1	Cell 1	-0.0984864
GFP	1	Cell 1	-1.31047
GFP	1	Cell 1	-0.197289
GFP	1	Cell 1	-0.873785
GFP	1	Cell 1	-0.906309
GFP	1	Cell 1	-5
GFP	1	Cell 1	-0.740726
GFP	1	Cell 1	-5
GFP	1	Cell 1	-0.613921
GFP	1	Cell 1	-1.19166
GFP	1	Cell 1	-2.26912
GFP	1	Cell 1	-1.2669
GFP	1	Cell 1	-5
GFP	1	Cell 1	-5
GFP	1	Cell 1	-5
GFP	1	Cell 1	-1.26541
GFP	1	Cell 1	-5
GFP	1	Cell 1	-5
GFP	1	Cell 1	-5
GFP	1	Cell 1	-5
GFP	1	Cell 1	-5
GFP	1	Cell 1	-0.687226
GFP	1	Cell 1	-0.272586
GFP	1	Cell 1	-3.15911
GFP	1	Cell 1	-0.869544
GFP	1	Cell 1	-5
GFP	1	Cell 1	0.442188
GFP	1	Cell 1	-0.35308
GFP	1	Cell 1	-0.340863
GFP	1	Cell 1	0.233121
GFP	1	Cell 1	-5
GFP	1	Cell 1	-0.236452
GFP	1	Cell 1	-0.174445
GFP	1	Cell 1	-0.293701
GFP	1	Cell 1	-0.187679
GFP	1	Cell 1	-0.170138
GFP	1	Cell 1	-0.277545
GFP	1	Cell 1	-0.92272
GFP	1	Cell 1	-5
GFP	1	Cell 1	-0.100447
GFP	1	Cell 1	-0.762994
GFP	1	Cell 1	-2.06358
GFP	1	Cell 1	-5
GFP	1	Cell 1	-5
GFP	1	Cell 1	-5
GFP	1	Cell 1	0.219047
GFP	1	Cell 1	0.197964
GFP	1	Cell 1	0.239434
GFP	1	Cell 1	0.226837
GFP	1	Cell 1	0.23175
GFP	1	Cell 1	0.221855
GFP	1	Cell 1	0.212833
GFP	1	Cell 1	0.244458
GFP	1	Cell 1	-1.04533
GFP	1	Cell 1	-0.886297
GFP	1	Cell 1	-1.58752
GFP	1	Cell 1	-1.03569
GFP	1	Cell 1	-0.57067
GFP	1	Cell 1	-0.449547
GFP	1	Cell 1	-1.63083
GFP	1	Cell 1	-0.0495241
GFP	1	Cell 1	-0.213593
GFP	1	Cell 1	-0.145079
GFP	1	Cell 1	-0.297809
GFP	1	Cell 1	-0.162567
GFP	1	Cell 1	-0.798223
GFP	1	Cell 1	-0.869812
GFP	1	Cell 1	-0.822101
GFP	1	Cell 1	-0.726343
GFP	1	Cell 1	-0.746622
GFP	1	Cell 1	-5
GFP	1	Cell 1	-1.37801
GFP	1	Cell 1	-0.63516
GFP	1	Cell 1	-0.693742
GFP	1	Cell 1	-0.987771
GFP	1	Cell 1	0.522808
GFP	1	Cell 1	-1.11628
GFP	1	Cell 1	-1.30479
GFP	1	Cell 1	-5
GFP	1	Cell 1	-0.364628
GFP	1	Cell 1	-0.723002
GFP	1	Cell 1	-0.69178
GFP	1	Cell 1	-2.83761
GFP	1	Cell 1	-5
GFP	1	Cell 1	-5
GFP	1	Cell 1	-5
GFP	1	Cell 1	-5
GFP	1	Cell 1	-0.978932
GFP	1	Cell 1	-0.19862
GFP	1	Cell 1	-1.00621
GFP	1	Cell 1	-0.947793
GFP	1	Cell 1	-1.83527
GFP	1	Cell 1	-2.67468
GFP	1	Cell 1	-0.661864
GFP	1	Cell 1	-1.31513
GFP	1	Cell 1	-1.72688
GFP	1	Cell 1	-1.41347
GFP	1	Cell 1	-1.18707
GFP	1	Cell 1	-0.969704
GFP	1	Cell 1	-0.465606
GFP	1	Cell 1	-0.863631
GFP	1	Cell 1	-1.51023
GFP	1	Cell 1	-0.200051
GFP	1	Cell 1	-1.02785
GFP	1	Cell 1	-0.892616
GFP	1	Cell 1	-5
GFP	1	Cell 1	-0.805199
GFP	1	Cell 1	-1.38022
GFP	1	Cell 1	-5
GFP	1	Cell 1	-1.30177
GFP	1	Cell 1	-5
GFP	1	Cell 1	-0.307899
GFP	1	Cell 1	-0.359179
GFP	1	Cell 1	0.533383
GFP	1	Cell 1	-1.13796
GFP	1	Cell 1	-0.335798
GFP	1	Cell 1	-0.357017
GFP	1	Cell 1	-0.68725
GFP	1	Cell 1	-5
GFP	1	Cell 1	-1.31835
GFP	1	Cell 1	-0.852184
GFP	1	Cell 1	-0.673026
GFP	1	Cell 1	-5
GFP	1	Cell 1	-5
GFP	1	Cell 1	-0.430367
GFP	1	Cell 1	-0.661282
GFP	1	Cell 1	-0.302313
GFP	1	Cell 1	-0.36683
GFP	1	Cell 1	-0.0798493
GFP	1	Cell 1	0.0274747
GFP	1	Cell 1	0.190143
GFP	1	Cell 1	0.134774
GFP	1	Cell 1	-1.39554
GFP	1	Cell 1	-0.355338
GFP	1	Cell 1	-0.681825
GFP	1	Cell 1	-0.491937
GFP	1	Cell 1	-2.25289
GFP	1	Cell 1	0.428029
GFP	1	Cell 1	-0.177236
GFP	1	Cell 1	-0.23325
GFP	1	Cell 1	-0.402399
GFP	1	Cell 1	-0.186568
GFP	1	Cell 1	-0.53611
GFP	1	Cell 1	-5
GFP	1	Cell 1	-1.0534
GFP	1	Cell 1	-5
GFP	1	Cell 1	-5
GFP	1	Cell 1	-0.886909
GFP	1	Cell 1	-0.884851
GFP	1	Cell 1	-1.06861
GFP	1	Cell 1	-0.943181
GFP	1	Cell 1	-0.834437
GFP	1	Cell 1	-5
GFP	1	Cell 1	-5
GFP	1	Cell 1	-5
GFP	1	Cell 1	-0.828562
GFP	1	Cell 1	-0.839425
GFP	1	Cell 1	-1.03958
GFP	1	Cell 1	-0.782844
GFP	1	Cell 1	-5
GFP	1	Cell 1	-0.223681
GFP	1	Cell 1	-0.224339
GFP	1	Cell 1	-0.258127
GFP	1	Cell 1	-0.209324
GFP	1	Cell 1	-0.196337
GFP	1	Cell 1	-0.617048
GFP	1	Cell 1	-0.764787
GFP	1	Cell 1	-1.44429
GFP	1	Cell 1	0.0519125
GFP	1	Cell 1	-0.49718
GFP	1	Cell 1	-0.343895
GFP	1	Cell 1	-0.426607
GFP	1	Cell 1	-0.316774
GFP	1	Cell 1	-0.204243
GFP	1	Cell 1	-0.0807582
GFP	1	Cell 1	-1.34423
GFP	1	Cell 1	-0.514085
GFP	1	Cell 1	-0.959253
GFP	1	Cell 1	-0.000513297
GFP	1	Cell 1	0.0610281
GFP	1	Cell 1	0.0369144
GFP	1	Cell 1	-5
GFP	1	Cell 1	-5
GFP	1	Cell 1	-0.0800901
GFP	1	Cell 1	-0.0666352
GFP	1	Cell 1	-0.208663
GFP	1	Cell 1	0.185288
GFP	1	Cell 1	-0.529446
GFP	1	Cell 1	-0.247182
GFP	1	Cell 1	-1.83518
GFP	1	Cell 1	-5
GFP	1	Cell 1	-1.13327
GFP	1	Cell 1	-5
GFP	1	Cell 1	-2.544
GFP	1	Cell 1	-0.361073
GFP	1	Cell 1	0.0273379
GFP	1	Cell 1	-0.070737
GFP	1	Cell 1	0.0406909
GFP	1	Cell 1	-0.632448
GFP	1	Cell 1	0.0844058
GFP	1	Cell 1	0.0962205
GFP	1	Cell 1	-0.274786
GFP	1	Cell 1	-0.293248
GFP	1	Cell 1	-0.366051
GFP	1	Cell 1	0.195504
GFP	1	Cell 1	0.181568
GFP	1	Cell 1	0.167529
GFP	1	Cell 1	-2.31613
GFP	1	Cell 1	-0.925058
GFP	1	Cell 1	-0.571824
GFP	1	Cell 1	0.214495
GFP	1	Cell 1	0.163367
GFP	1	Cell 1	-0.105031
GFP	1	Cell 1	0.0226586
GFP	1	Cell 1	-0.0296336
GFP	1	Cell 1	0.0119671
GFP	1	Cell 1	-3.04787
GFP	1	Cell 1	0.226848
GFP	1	Cell 1	0.271036
GFP	1	Cell 1	0.202187
GFP	1	Cell 1	0.254299
GFP	1	Cell 1	0.267831
GFP	1	Cell 1	-1.0871
GFP	1	Cell 1	-0.619437
GFP	1	Cell 1	-0.610227
GFP	1	Cell 1	0.0420878
GFP	1	Cell 1	-0.386707
GFP	1	Cell 1	-0.421179
GFP	1	Cell 1	-0.418442
GFP	1	Cell 1	-0.438187
GFP	1	Cell 1	-0.84583
GFP	1	Cell 1	0.0311897
GFP	1	Cell 1	0.025285
GFP	1	Cell 1	0.0490878
GFP	1	Cell 1	-0.0323974
GFP	1	Cell 1	-5
GFP	1	Cell 1	-5
GFP	1	Cell 1	0.372201
GFP	1	Cell 1	0.347977
GFP	1	Cell 1	-0.929565
GFP	1	Cell 1	-0.291239
GFP	1	Cell 1	-0.940082
GFP	1	Cell 1	-0.601049
GFP	1	Cell 1	-0.794249
GFP	1	Cell 1	-2.06487
GFP	1	Cell 1	-5
GFP	1	Cell 1	0.135572
GFP	1	Cell 1	-1.1446
GFP	1	Cell 1	0.0597452
GFP	1	Cell 1	-0.0678663
GFP	1	Cell 1	0.0462944
GFP	1	Cell 1	-1.29906
GFP	1	Cell 1	0.100347
GFP	1	Cell 1	-0.809219
GFP	1	Cell 1	-5
GFP	1	Cell 1	-5
GFP	1	Cell 1	-0.299082
GFP	1	Cell 1	0.325088
GFP	1	Cell 1	0.0874763
GFP	1	Cell 1	0.0850865
GFP	1	Cell 1	-0.16178
GFP	1	Cell 1	-0.788444
GFP	1	Cell 1	-0.370951
GFP	1	Cell 1	0.285215
GFP	1	Cell 1	0.257977
GFP	1	Cell 1	-5
GFP	1	Cell 1	-1.87545
GFP	1	Cell 1	-0.26178
GFP	1	Cell 1	-2.93207
GFP	1	Cell 1	-5
GFP	1	Cell 1	-3.25154
GFP	1	Cell 1	-1.05249
GFP	1	Cell 1	-0.88962
GFP	1	Cell 1	-0.112521
GFP	1	Cell 1	-0.132102
GFP	1	Cell 1	-2.34389
GFP	1	Cell 1	-2.53734
GFP	1	Cell 1	-2.2328
GFP	1	Cell 1	-0.84717
GFP	1	Cell 1	-0.588719
GFP	1	Cell 1	-0.108586
GFP	1	Cell 1	0.224798
GFP	1	Cell 1	0.183518
GFP	1	Cell 1	-0.68198
GFP	1	Cell 1	-1.0437
GFP	1	Cell 1	-5
GFP	1	Cell 1	-0.840443
GFP	1	Cell 1	-0.570508
GFP	1	Cell 1	-1.82828
GFP	1	Cell 1	-0.579195
GFP	1	Cell 1	-0.743776
GFP	1	Cell 1	-0.522997
GFP	1	Cell 1	-0.854874
GFP	1	Cell 1	-1.97214
GFP	1	Cell 1	-1.12805
GFP	1	Cell 1	0.20278
GFP	1	Cell 1	0.190365
GFP	1	Cell 1	0.17687
GFP	1	Cell 1	-1.47008
GFP	1	Cell 1	-5
GFP	1	Cell 1	-0.478621
GFP	1	Cell 1	0.339697
GFP	1	Cell 1	-0.515365
GFP	1	Cell 1	-0.507872
GFP	1	Cell 1	-5
GFP	1	Cell 1	-1.84301
GFP	1	Cell 1	-0.476947
GFP	1	Cell 1	-0.499176
GFP	1	Cell 1	-0.206428
GFP	1	Cell 1	-1.60107
GFP	1	Cell 1	-1.74225
GFP	1	Cell 1	-5
GFP	1	Cell 1	-5
GFP	1	Cell 1	-0.869155
GFP	1	Cell 1	-0.686418
GFP	1	Cell 1	-0.614458
GFP	1	Cell 1	-0.792837
GFP	1	Cell 1	-1.07101
GFP	1	Cell 1	-2.38207
GFP	1	Cell 1	-0.94941
GFP	1	Cell 1	-0.105978
GFP	1	Cell 1	-0.0698435
GFP	1	Cell 1	-0.0400643
GFP	1	Cell 1	-0.0393037
GFP	1	Cell 1	-0.366289
GFP	1	Cell 1	-0.39909
GFP	1	Cell 1	-1.35895
GFP	1	Cell 1	-0.00874737
GFP	1	Cell 1	-0.368043
GFP	1	Cell 1	0.21261
GFP	1	Cell 1	-0.76101
GFP	1	Cell 1	-0.388688
GFP	1	Cell 1	-5
GFP	1	Cell 1	-5
GFP	1	Cell 1	-5
GFP	1	Cell 1	-1.76826
GFP	1	Cell 1	-0.428744
GFP	1	Cell 1	-0.367116
GFP	1	Cell 1	-0.332628
GFP	1	Cell 1	-0.423299
GFP	1	Cell 1	-0.238225
GFP	1	Cell 1	-0.373562
GFP	1	Cell 1	-0.118194
GFP	1	Cell 1	-0.145151
GFP	1	Cell 1	-0.721449
GFP	1	Cell 1	-0.734655
GFP	1	Cell 1	-5
GFP	1	Cell 1	0.15315
GFP	1	Cell 1	0.0475063
GFP	1	Cell 1	-2.43931
GFP	1	Cell 1	-5
GFP	1	Cell 1	-5
GFP	1	Cell 1	0.0840361
GFP	1	Cell 1	-0.595819
GFP	1	Cell 1	-1.29509
GFP	1	Cell 1	-0.701149
GFP	1	Cell 1	-0.891516
GFP	1	Cell 1	-0.200493
GFP	1	Cell 1	-0.236529
GFP	1	Cell 1	-0.213208
GFP	1	Cell 1	-0.678415
GFP	1	Cell 1	-0.320971
GFP	1	Cell 1	-5
GFP	1	Cell 1	-1.12754
GFP	1	Cell 1	-0.918379
GFP	1	Cell 1	-0.997114
GFP	1	Cell 1	0.0567073
GFP	1	Cell 1	-0.416846
GFP	1	Cell 1	-5
GFP	1	Cell 1	-5
GFP	1	Cell 1	-0.302562
GFP	1	Cell 1	-0.171937
GFP	1	Cell 1	-0.259273
GFP	1	Cell 1	-0.82833
GFP	1	Cell 1	-0.590333
GFP	1	Cell 1	-0.250558
GFP	1	Cell 1	-0.538783
GFP	1	Cell 1	-0.463972
GFP	1	Cell 1	-5
GFP	1	Cell 1	-5
GFP	1	Cell 1	-0.753924
GFP	1	Cell 1	-2.17472
GFP	1	Cell 1	-0.214685
GFP	1	Cell 1	-0.373818
GFP	1	Cell 1	-0.363563
GFP	1	Cell 1	0.0442283
GFP	1	Cell 1	-0.415486
GFP	1	Cell 1	-0.624158
GFP	1	Cell 1	-0.275121
GFP	1	Cell 1	-0.21193
GFP	1	Cell 1	-0.640576
GFP	1	Cell 1	-0.788991
GFP	1	Cell 1	-5
GFP	1	Cell 1	-0.928406
GFP	1	Cell 1	-0.418437
GFP	1	Cell 1	-0.713525
GFP	1	Cell 1	-5
GFP	1	Cell 1	-0.683374
GFP	1	Cell 1	-0.895436
GFP	1	Cell 1	-0.374917
GFP	1	Cell 1	-1.42257
GFP	1	Cell 1	-1.3984
GFP	1	Cell 1	-1.11316
GFP	1	Cell 1	-0.840393
GFP	1	Cell 1	-1.07614
GFP	1	Cell 1	-5
GFP	1	Cell 1	-0.215666
GFP	1	Cell 1	-0.222932
GFP	1	Cell 1	-0.244745
GFP	1	Cell 1	-0.278429
GFP	1	Cell 1	-0.17442
GFP	1	Cell 1	-0.688455
GFP	1	Cell 1	-0.231308
GFP	1	Cell 1	-0.232973
GFP	1	Cell 1	-0.247102
GFP	1	Cell 1	-0.541311
GFP	1	Cell 1	-0.475134
GFP	1	Cell 1	-0.454419
GFP	1	Cell 1	-0.575757
GFP	1	Cell 1	-0.926443
GFP	1	Cell 1	-0.327553
GFP	1	Cell 1	-0.291809
GFP	1	Cell 1	-1.47594
GFP	1	Cell 1	-0.996773
GFP	1	Cell 1	-0.624022
GFP	1	Cell 1	-0.376058
GFP	1	Cell 1	-5
GFP	1	Cell 1	-0.471467
GFP	1	Cell 1	-0.547993
GFP	1	Cell 1	-0.424535
GFP	1	Cell 1	-5
GFP	1	Cell 1	-0.0534774
GFP	1	Cell 1	-0.0159993
GFP	1	Cell 1	0.110967
GFP	1	Cell 1	-0.839236
GFP	1	Cell 1	-0.517359
GFP	1	Cell 1	-0.499811
GFP	1	Cell 1	-0.697655
GFP	1	Cell 1	-0.21498
GFP	1	Cell 1	-0.255181
GFP	1	Cell 1	-0.303347
GFP	1	Cell 1	-0.194334
GFP	1	Cell 1	-1.14387
GFP	1	Cell 1	-5
GFP	1	Cell 1	-1.2438
GFP	1	Cell 1	-0.969059
GFP	1	Cell 1	-0.238039
GFP	1	Cell 1	-0.240465
GFP	1	Cell 1	-0.0594453
GFP	1	Cell 1	-0.0745934
GFP	1	Cell 1	-0.603927
GFP	1	Cell 1	-0.485399
GFP	1	Cell 1	-0.337533
GFP	1	Cell 1	-0.367989
GFP	1	Cell 1	-0.134275
GFP	1	Cell 1	-0.259247
GFP	1	Cell 1	-0.231756
GFP	1	Cell 1	-1.34239
GFP	1	Cell 1	-5
GFP	1	Cell 1	-1.34271
GFP	1	Cell 1	-1.298
GFP	1	Cell 1	-0.70913
GFP	1	Cell 1	-0.933353
GFP	1	Cell 1	-0.545271
GFP	1	Cell 1	-0.282473
GFP	1	Cell 1	-1.76974
GFP	1	Cell 1	-0.617316
GFP	1	Cell 1	-0.500238
GFP	1	Cell 1	-0.655701
GFP	1	Cell 1	-2.13228
GFP	1	Cell 1	-0.436637
GFP	1	Cell 1	-0.664118
GFP	1	Cell 1	-0.178152
GFP	1	Cell 1	-0.152342
GFP	1	Cell 1	-0.222751
GFP	1	Cell 1	-0.103906
GFP	1	Cell 1	-0.107602
GFP	1	Cell 1	-0.24235
GFP	1	Cell 1	-5
GFP	1	Cell 1	-5
GFP	1	Cell 1	-5
GFP	1	Cell 1	-0.978045
GFP	1	Cell 1	-1.97667
GFP	1	Cell 1	-1.9994
GFP	1	Cell 1	-1.12609
GFP	1	Cell 1	-1.10392
GFP	1	Cell 1	-0.578259
GFP	1	Cell 1	-1.21102
GFP	1	Cell 1	-0.488833
GFP	1	Cell 1	-0.689723
GFP	1	Cell 1	-0.524889
GFP	1	Cell 1	-0.365466
GFP	1	Cell 1	-0.425347
GFP	1	Cell 1	-0.385848
GFP	1	Cell 1	-0.371818
GFP	1	Cell 1	-0.480926
GFP	1	Cell 1	-0.477303
GFP	1	Cell 1	-0.277253
GFP	1	Cell 1	-0.599265
GFP	1	Cell 1	-0.811395
GFP	1	Cell 1	-0.75023
GFP	1	Cell 1	-0.974461
GFP	1	Cell 1	-0.0635206
GFP	1	Cell 1	0.114158
GFP	1	Cell 1	0.121011
GFP	1	Cell 1	0.0833005
GFP	1	Cell 1	0.0480723
GFP	1	Cell 1	-0.350732
GFP	1	Cell 1	-0.249911
GFP	1	Cell 1	-0.232284
GFP	1	Cell 1	-0.732902
GFP	1	Cell 1	-1.26916
GFP	1	Cell 1	-1.95241
GFP	1	Cell 1	-5
GFP	1	Cell 1	-5
GFP	1	Cell 1	-5
GFP	1	Cell 1	-0.382815
GFP	1	Cell 1	-0.261253
GFP	1	Cell 1	-0.338671
GFP	1	Cell 1	-0.177479
GFP	1	Cell 1	-0.150843
GFP	1	Cell 1	-0.153184
GFP	1	Cell 1	-0.214209
GFP	1	Cell 1	-0.363292
GFP	1	Cell 1	-0.461822
GFP	1	Cell 1	-0.280464
GFP	1	Cell 1	-0.401744
GFP	1	Cell 1	-0.253467
GFP	1	Cell 1	-1.06191
GFP	1	Cell 1	-1.19031
GFP	1	Cell 1	-0.799205
GFP	1	Cell 1	-1.47999
GFP	1	Cell 1	-0.456938
GFP	1	Cell 1	-1.66468
GFP	1	Cell 1	-0.170981
GFP	1	Cell 1	0.0438598
GFP	1	Cell 1	-5
GFP	1	Cell 1	-0.991351
GFP	1	Cell 1	-5
GFP	1	Cell 1	-0.515468
GFP	1	Cell 1	-1.56632
GFP	1	Cell 1	-5
GFP	1	Cell 1	-5
GFP	1	Cell 1	-5
GFP	1	Cell 1	-5
GFP	1	Cell 1	-5
GFP	1	Cell 1	-0.420148
GFP	1	Cell 1	-0.401909
GFP	1	Cell 1	-2.21192
GFP	1	Cell 1	0.115283
GFP	1	Cell 1	-1.07912
GFP	1	Cell 1	-0.631288
GFP	1	Cell 1	-0.670253
GFP	1	Cell 1	-0.420546
GFP	1	Cell 1	-0.382733
GFP	1	Cell 1	0.314073
GFP	1	Cell 1	0.271737
GFP	1	Cell 1	-5
GFP	1	Cell 1	-1.20065
GFP	1	Cell 1	0.328607
GFP	1	Cell 1	0.287144
GFP	1	Cell 1	-0.197881
GFP	1	Cell 1	-0.190694
GFP	1	Cell 1	-0.0850667
GFP	1	Cell 1	-0.205059
GFP	1	Cell 1	-0.163647
GFP	1	Cell 1	-0.176057
GFP	1	Cell 1	0.136367
GFP	1	Cell 1	-0.572312
GFP	1	Cell 1	-0.522533
GFP	1	Cell 1	-0.396353
GFP	1	Cell 1	-0.383856
GFP	1	Cell 1	-0.35084
GFP	1	Cell 1	-0.0370052
GFP	1	Cell 1	-0.269751
GFP	1	Cell 1	-0.258799
GFP	1	Cell 1	-0.920383
GFP	1	Cell 1	-5
GFP	1	Cell 1	-5
GFP	1	Cell 1	-0.0937989
GFP	1	Cell 1	-5
GFP	1	Cell 1	-0.535522
GFP	1	Cell 1	-0.746688
GFP	1	Cell 1	-0.84795
GFP	1	Cell 1	-0.744838
GFP	1	Cell 1	-0.827143
GFP	1	Cell 1	-0.149033
GFP	1	Cell 1	-0.128135
GFP	1	Cell 1	-0.143105
GFP	1	Cell 1	-0.111902
GFP	1	Cell 1	-0.0943325
GFP	1	Cell 1	-0.201996
GFP	1	Cell 1	-0.261336
GFP	1	Cell 1	-0.235268
GFP	1	Cell 1	-0.174645
GFP	1	Cell 1	-0.295341
GFP	1	Cell 1	-1.12222
GFP	1	Cell 1	-5
GFP	1	Cell 1	-1.28534
GFP	1	Cell 1	-5
GFP	1	Cell 1	-3.43912
GFP	1	Cell 1	-5
GFP	1	Cell 1	-5
GFP	1	Cell 1	-5
GFP	1	Cell 1	-0.864027
GFP	1	Cell 1	-0.638517
GFP	1	Cell 1	-0.663086
GFP	1	Cell 1	-1.33714
GFP	1	Cell 1	-0.657221
GFP	1	Cell 1	-0.68038
GFP	1	Cell 1	-0.911006
GFP	1	Cell 1	-0.656847
GFP	1	Cell 1	-0.630172
GFP	1	Cell 1	-0.652121
GFP	1	Cell 1	-1.80561
GFP	1	Cell 1	-0.317293
GFP	1	Cell 1	-0.150338
GFP	1	Cell 1	-0.233769
GFP	1	Cell 1	-0.52615
GFP	1	Cell 1	-0.516297
GFP	1	Cell 1	-0.469151
GFP	1	Cell 1	-0.621631
GFP	1	Cell 1	-0.498023
GFP	1	Cell 1	-0.522931
GFP	1	Cell 1	0.250483
GFP	1	Cell 1	-0.322006
GFP	1	Cell 1	-0.331729
GFP	1	Cell 1	-0.288321
GFP	1	Cell 1	-0.197275
GFP	1	Cell 1	0.145244
GFP	1	Cell 1	-5
GFP	1	Cell 1	-5
GFP	1	Cell 1	-5
GFP	1	Cell 1	-5
GFP	1	Cell 1	-0.281292
GFP	1	Cell 1	-0.591225
GFP	1	Cell 1	-0.619931
GFP	1	Cell 1	-0.624573
GFP	1	Cell 1	-1.20346
GFP	1	Cell 1	-0.26354
GFP	1	Cell 1	-0.180789
GFP	1	Cell 1	-0.18423
GFP	1	Cell 1	-0.362392
GFP	1	Cell 1	-0.297016
GFP	1	Cell 1	-1.13511
GFP	1	Cell 1	-0.353383
GFP	1	Cell 1	-0.305823
GFP	1	Cell 1	-0.386684
GFP	1	Cell 1	-0.264025
GFP	1	Cell 1	-1.1095
GFP	1	Cell 1	-0.724939
GFP	1	Cell 1	-5
GFP	1	Cell 1	-5
GFP	1	Cell 1	-1.25608
GFP	1	Cell 1	0.231644
GFP	1	Cell 1	-0.218732
GFP	1	Cell 1	-0.960953
GFP	1	Cell 1	-5
GFP	1	Cell 1	-5
GFP	1	Cell 1	0.190745
GFP	1	Cell 1	0.194042
GFP	1	Cell 1	-0.472844
GFP	1	Cell 1	-0.262997
GFP	1	Cell 1	-0.122723
GFP	1	Cell 1	-1.54674
GFP	1	Cell 1	-5
GFP	1	Cell 1	-5
GFP	1	Cell 1	-5
GFP	1	Cell 1	-0.494056
GFP	1	Cell 1	-2.57331
GFP	1	Cell 1	0.183801
GFP	1	Cell 1	-0.249563
GFP	1	Cell 1	-2.44334
GFP	1	Cell 1	-5
GFP	1	Cell 1	-5
GFP	1	Cell 1	-1.85552
GFP	1	Cell 1	-5
GFP	1	Cell 1	-0.308084
GFP	1	Cell 1	-0.33736
GFP	1	Cell 1	-5
GFP	1	Cell 1	-5
GFP	1	Cell 1	-0.162653
GFP	1	Cell 1	-0.497032
GFP	1	Cell 1	-0.379321
GFP	1	Cell 1	-0.388013
GFP	1	Cell 1	-0.831346
GFP	1	Cell 1	-0.546659
GFP	1	Cell 1	-0.754012
GFP	1	Cell 1	-0.218054
GFP	1	Cell 1	-0.142839
GFP	1	Cell 1	-0.227898
GFP	1	Cell 1	-0.13806
GFP	1	Cell 1	-0.845977
GFP	1	Cell 1	-0.728691
GFP	1	Cell 1	-0.733399
GFP	1	Cell 1	-1.76067
GFP	1	Cell 1	-0.619169
GFP	1	Cell 1	-0.686306
GFP	1	Cell 1	-1.0689
GFP	1	Cell 1	-1.17565
GFP	1	Cell 1	0.0633648
GFP	1	Cell 1	0.111226
GFP	1	Cell 1	0.0973689
GFP	1	Cell 1	0.0935569
GFP	1	Cell 1	0.107953
GFP	1	Cell 1	0.0783584
GFP	1	Cell 1	0.143874
GFP	1	Cell 1	0.147322
GFP	1	Cell 1	-5
GFP	1	Cell 1	-1.1065
GFP	1	Cell 1	-0.899838
GFP	1	Cell 1	-0.152812
GFP	1	Cell 1	-5
GFP	1	Cell 1	-0.689974
GFP	1	Cell 1	-0.756137
GFP	1	Cell 1	-0.116887
GFP	1	Cell 1	-0.259323
GFP	1	Cell 1	-0.135611
GFP	1	Cell 1	-0.265377
GFP	1	Cell 1	-0.219339
GFP	1	Cell 1	-0.39005
GFP	1	Cell 1	-0.281245
GFP	1	Cell 1	-0.325047
GFP	1	Cell 1	-0.20327
GFP	1	Cell 1	-0.574792
GFP	1	Cell 1	-0.322351
GFP	1	Cell 1	-0.403661
GFP	1	Cell 1	-0.599752
GFP	1	Cell 1	-1.07281
GFP	1	Cell 1	-5
GFP	1	Cell 1	-0.688473
GFP	1	Cell 1	-0.475944
GFP	1	Cell 1	0.0644644
GFP	1	Cell 1	-1.06117
GFP	1	Cell 1	-5
GFP	1	Cell 1	-5
GFP	1	Cell 1	-3.1415
GFP	1	Cell 1	-5
GFP	1	Cell 1	-1.43547
GFP	1	Cell 1	-5
GFP	1	Cell 1	0.173817
GFP	1	Cell 1	-0.847496
GFP	1	Cell 1	-5
GFP	1	Cell 1	-5
GFP	1	Cell 1	-1.23392
GFP	1	Cell 1	-0.29973
GFP	1	Cell 1	-0.321931
GFP	1	Cell 1	-0.431957
GFP	1	Cell 1	-0.400124
GFP	1	Cell 1	0.282911
GFP	1	Cell 1	-2.48442
GFP	1	Cell 1	-1.37031
GFP	1	Cell 1	-0.847041
GFP	1	Cell 1	-0.294257
GFP	1	Cell 1	-5
GFP	1	Cell 1	-0.109056
GFP	1	Cell 1	-0.115396
GFP	1	Cell 1	0.359731
GFP	1	Cell 1	-1.77159
GFP	1	Cell 1	-0.017893
GFP	1	Cell 1	-0.768293
GFP	1	Cell 1	0.452176
GFP	1	Cell 1	0.457959
GFP	1	Cell 1	0.459138
GFP	1	Cell 1	-0.47458
GFP	1	Cell 1	-0.746141
GFP	1	Cell 1	-0.194058
GFP	1	Cell 1	-0.602534
GFP	1	Cell 1	-0.0620747
GFP	1	Cell 1	-0.117712
GFP	1	Cell 1	-5
GFP	1	Cell 1	-5
GFP	1	Cell 1	-5
GFP	1	Cell 1	-1.16205
GFP	1	Cell 1	-0.913329
GFP	1	Cell 1	-0.323975
GFP	1	Cell 1	-0.234624
GFP	1	Cell 1	-0.952744
GFP	1	Cell 1	-0.791668
GFP	1	Cell 1	-0.334649
GFP	1	Cell 1	-0.231158
GFP	1	Cell 1	-0.389276
GFP	1	Cell 1	-0.452641
GFP	1	Cell 1	-1.16958
GFP	1	Cell 1	-5
GFP	1	Cell 1	0.292124
GFP	1	Cell 1	-0.0435423
GFP	1	Cell 1	-5
GFP	1	Cell 1	0.0573467
GFP	1	Cell 1	0.126013
GFP	1	Cell 1	-2.95646
GFP	1	Cell 1	-1.26751
GFP	1	Cell 1	-1.11731
GFP	1	Cell 1	-5
GFP	1	Cell 1	-5
GFP	1	Cell 1	-5
GFP	1	Cell 1	-0.587229
GFP	1	Cell 1	-0.606604
GFP	1	Cell 1	0.307554
GFP	1	Cell 1	0.266005
GFP	1	Cell 1	0.248564
GFP	1	Cell 1	-1.42708
GFP	1	Cell 1	0.269398
GFP	1	Cell 1	-2.95288
GFP	1	Cell 1	-5
GFP	1	Cell 1	-5
GFP	1	Cell 1	-0.778251
GFP	1	Cell 1	-0.780373
GFP	1	Cell 1	-0.177876
GFP	1	Cell 1	-0.155926
GFP	1	Cell 1	-0.21706
GFP	1	Cell 1	-0.230016
GFP	1	Cell 1	-0.0138799
GFP	1	Cell 1	0.00515013
GFP	1	Cell 1	-0.3038
GFP	1	Cell 1	-0.275121
GFP	1	Cell 1	-0.46119
GFP	1	Cell 1	-0.251375
GFP	1	Cell 1	-0.359361
GFP	1	Cell 1	-1.30151
GFP	1	Cell 1	-0.728913
GFP	1	Cell 1	0.586371
GFP	1	Cell 1	-0.349767
GFP	1	Cell 1	-2.46069
GFP	1	Cell 1	-0.819453
GFP	1	Cell 1	-1.45229
GFP	1	Cell 1	-0.292307
GFP	1	Cell 1	-5
GFP	1	Cell 1	-1.23924
GFP	1	Cell 1	-5
GFP	1	Cell 1	-0.725864
GFP	1	Cell 1	-0.770679
GFP	1	Cell 1	-0.876856
GFP	1	Cell 1	-0.641978
GFP	1	Cell 1	-1.005
GFP	1	Cell 1	-1.3444
GFP	1	Cell 1	-5
GFP	1	Cell 1	-1.54317
GFP	1	Cell 1	-5
GFP	1	Cell 1	-1.10622
GFP	1	Cell 1	-0.843434
GFP	1	Cell 1	-0.411384
GFP	1	Cell 1	-3.40976
GFP	1	Cell 1	-0.951801
GFP	1	Cell 1	-0.992393
GFP	1	Cell 1	-0.44939
GFP	1	Cell 1	-0.44334
GFP	1	Cell 1	-2.13547
GFP	1	Cell 1	-5
GFP	1	Cell 1	0.223178
GFP	1	Cell 1	0.214783
GFP	1	Cell 1	-1.01324
GFP	1	Cell 1	-0.618162
GFP	1	Cell 1	-1.61551
GFP	1	Cell 1	-1.14531
GFP	1	Cell 1	-5
GFP	1	Cell 1	-0.558371
GFP	1	Cell 1	-0.118953
GFP	1	Cell 1	-0.101292
GFP	1	Cell 1	-0.112197
GFP	1	Cell 1	-1.64762
GFP	1	Cell 1	-0.99908
GFP	1	Cell 1	-2.36154
GFP	1	Cell 1	-5
GFP	1	Cell 1	-0.742408
GFP	1	Cell 1	0.156006
GFP	1	Cell 1	0.125974
GFP	1	Cell 1	0.124002
GFP	1	Cell 1	0.371293
GFP	1	Cell 1	0.36345
GFP	1	Cell 1	-5
GFP	1	Cell 1	-0.650904
GFP	1	Cell 1	-2.45136
GFP	1	Cell 1	-5
GFP	1	Cell 1	-5
GFP	1	Cell 1	-0.114623
GFP	1	Cell 1	-0.159059
GFP	1	Cell 1	-0.0786004
GFP	1	Cell 1	-1.71177
GFP	1	Cell 1	0.288563
GFP	1	Cell 1	0.247433
GFP	1	Cell 1	0.271513
GFP	1	Cell 1	0.260312
GFP	1	Cell 1	-5
GFP	1	Cell 1	0.187892
GFP	1	Cell 1	-0.49668
GFP	1	Cell 1	-0.703175
GFP	1	Cell 1	-0.329207
GFP	1	Cell 1	-0.603567
GFP	1	Cell 1	-0.0325561
GFP	1	Cell 1	0.0411087
GFP	1	Cell 1	0.0188129
GFP	1	Cell 1	-0.953188
GFP	1	Cell 1	-0.838129
GFP	1	Cell 1	-5
GFP	1	Cell 1	-0.616541
GFP	1	Cell 1	-1.12408
GFP	1	Cell 1	-0.416615
GFP	1	Cell 1	-1.11854
GFP	1	Cell 1	0.253095
GFP	1	Cell 1	0.256034
GFP	1	Cell 1	0.287971
GFP	1	Cell 1	-0.841756
GFP	1	Cell 1	-0.444772
GFP	1	Cell 1	-0.567236
GFP	1	Cell 1	-5
GFP	1	Cell 1	-0.736246
GFP	1	Cell 1	-1.43712
GFP	1	Cell 1	-5
GFP	1	Cell 1	-0.46892
GFP	1	Cell 1	-0.361292
GFP	1	Cell 1	-0.272977
GFP	1	Cell 1	-0.677722
GFP	1	Cell 1	-0.472338
GFP	1	Cell 1	-0.539045
GFP	1	Cell 1	-5
GFP	1	Cell 1	-5
GFP	1	Cell 1	-0.951202
GFP	1	Cell 1	-1.35633
GFP	1	Cell 1	-1.69901
GFP	1	Cell 1	-5
GFP	1	Cell 1	-5
GFP	1	Cell 1	0.151534
GFP	1	Cell 1	0.394409
GFP	1	Cell 1	0.00276374
GFP	1	Cell 1	-0.34992
GFP	1	Cell 1	-0.515457
GFP	1	Cell 1	-0.625
GFP	1	Cell 1	-0.4351
GFP	1	Cell 1	-0.418175
GFP	1	Cell 1	-0.519835
GFP	1	Cell 1	-0.217244
GFP	1	Cell 1	-0.0409589
GFP	1	Cell 1	0.00174895
GFP	1	Cell 2	-5
GFP	1	Cell 2	-2.91473
GFP	1	Cell 2	-5
GFP	1	Cell 2	-5
GFP	1	Cell 2	-0.668331
GFP	1	Cell 2	-0.806683
GFP	1	Cell 2	-5
GFP	1	Cell 2	-0.889976
GFP	1	Cell 2	-0.605927
GFP	1	Cell 2	-1.13711
GFP	1	Cell 2	-0.81416
GFP	1	Cell 2	-0.697956
GFP	1	Cell 2	-0.709757
GFP	1	Cell 2	-1.33321
GFP	1	Cell 2	-0.728258
GFP	1	Cell 2	-5
GFP	1	Cell 2	0.246549
GFP	1	Cell 2	-1.48581
GFP	1	Cell 2	-1.24785
GFP	1	Cell 2	-1.09971
GFP	1	Cell 2	0.123795
GFP	1	Cell 2	-5
GFP	1	Cell 2	-5
GFP	1	Cell 2	-1.21349
GFP	1	Cell 2	-0.386066
GFP	1	Cell 2	-0.38836
GFP	1	Cell 2	-0.543817
GFP	1	Cell 2	0.0680164
GFP	1	Cell 2	0.144407
GFP	1	Cell 2	-0.28634
GFP	1	Cell 2	-0.0779071
GFP	1	Cell 2	-0.0117689
GFP	1	Cell 2	-0.0696884
GFP	1	Cell 2	0.0513987
GFP	1	Cell 2	-0.0954141
GFP	1	Cell 2	-5
GFP	1	Cell 2	-5
GFP	1	Cell 2	-0.912473
GFP	1	Cell 2	-5
GFP	1	Cell 2	-0.552898
GFP	1	Cell 2	-5
GFP	1	Cell 2	-0.650445
GFP	1	Cell 2	-0.904146
GFP	1	Cell 2	-0.0556145
GFP	1	Cell 2	-0.0886324
GFP	1	Cell 2	-0.0425972
GFP	1	Cell 2	-0.0189121
GFP	1	Cell 2	-1.02603
GFP	1	Cell 2	-5
GFP	1	Cell 2	-1.17626
GFP	1	Cell 2	-1.81223
GFP	1	Cell 2	-0.931175
GFP	1	Cell 2	-0.556204
GFP	1	Cell 2	-0.985132
GFP	1	Cell 2	-1.54888
GFP	1	Cell 2	-0.28186
GFP	1	Cell 2	-0.345448
GFP	1	Cell 2	-0.208067
GFP	1	Cell 2	-0.0570053
GFP	1	Cell 2	-0.0406919
GFP	1	Cell 2	0.347071
GFP	1	Cell 2	0.347012
GFP	1	Cell 2	0.320066
GFP	1	Cell 2	0.296416
GFP	1	Cell 2	0.319728
GFP	1	Cell 2	-0.0894298
GFP	1	Cell 2	0.0291013
GFP	1	Cell 2	0.0517607
GFP	1	Cell 2	0.0345945
GFP	1	Cell 2	-0.301071
GFP	1	Cell 2	-0.217411
GFP	1	Cell 2	-0.57169
GFP	1	Cell 2	0.34687
GFP	1	Cell 2	-1.14742
GFP	1	Cell 2	-0.659795
GFP	1	Cell 2	-0.776271
GFP	1	Cell 2	-0.632526
GFP	1	Cell 2	-0.671904
GFP	1	Cell 2	-5
GFP	1	Cell 2	-0.414757
GFP	1	Cell 2	-0.420165
GFP	1	Cell 2	-0.469048
GFP	1	Cell 2	-0.393452
GFP	1	Cell 2	-0.0954985
GFP	1	Cell 2	-0.282581
GFP	1	Cell 2	-0.586907
GFP	1	Cell 2	-0.537051
GFP	1	Cell 2	-0.130953
GFP	1	Cell 2	-0.138563
GFP	1	Cell 2	-0.0629132
GFP	1	Cell 2	-0.0520324
GFP	1	Cell 2	-0.0274843
GFP	1	Cell 2	-0.0499356
GFP	1	Cell 2	-0.0562923
GFP	1	Cell 2	-0.218567
GFP	1	Cell 2	-0.106291
GFP	1	Cell 2	-1.17885
GFP	1	Cell 2	-5
GFP	1	Cell 2	-1.15012
GFP	1	Cell 2	-1.3412
GFP	1	Cell 2	-0.152962
GFP	1	Cell 2	-0.140213
GFP	1	Cell 2	-0.409466
GFP	1	Cell 2	-0.778641
GFP	1	Cell 2	-0.781583
GFP	1	Cell 2	-0.796484
GFP	1	Cell 2	-0.417876
GFP	1	Cell 2	-0.978344
GFP	1	Cell 2	-1.06696
GFP	1	Cell 2	0.029348
GFP	1	Cell 2	-0.257754
GFP	1	Cell 2	0.364065
GFP	1	Cell 2	0.32935
GFP	1	Cell 2	-0.922595
GFP	1	Cell 2	-0.435182
GFP	1	Cell 2	-0.441193
GFP	1	Cell 2	0.153642
GFP	1	Cell 2	0.0656224
GFP	1	Cell 2	0.135624
GFP	1	Cell 2	-5
GFP	1	Cell 2	-0.526377
GFP	1	Cell 2	-0.435456
GFP	1	Cell 2	-0.486996
GFP	1	Cell 2	-1.20622
GFP	1	Cell 2	-0.17171
GFP	1	Cell 2	-0.217185
GFP	1	Cell 2	-0.625735
GFP	1	Cell 2	-1.01926
GFP	1	Cell 2	-5
GFP	1	Cell 2	-0.59164
GFP	1	Cell 2	-5
GFP	1	Cell 2	-1.50222
GFP	1	Cell 2	-0.955386
GFP	1	Cell 2	-5
GFP	1	Cell 2	-5
GFP	1	Cell 2	0.539834
GFP	1	Cell 2	-0.0374782
GFP	1	Cell 2	-0.0691114
GFP	1	Cell 2	-0.985187
GFP	1	Cell 2	-0.789955
GFP	1	Cell 2	-0.798149
GFP	1	Cell 2	-5
GFP	1	Cell 2	0.155401
GFP	1	Cell 2	0.0213084
GFP	1	Cell 2	-0.0301029
GFP	1	Cell 2	-1.03878
GFP	1	Cell 2	-0.096762
GFP	1	Cell 2	-0.0358398
GFP	1	Cell 2	-0.0821064
GFP	1	Cell 2	-0.0182487
GFP	1	Cell 2	-0.875558
GFP	1	Cell 2	-0.527178
GFP	1	Cell 2	-0.973488
GFP	1	Cell 2	-5
GFP	1	Cell 2	-5
GFP	1	Cell 2	-1.14144
GFP	1	Cell 2	-5
GFP	1	Cell 2	-5
GFP	1	Cell 2	-1.5759
GFP	1	Cell 2	-1.4913
GFP	1	Cell 2	-1.08928
GFP	1	Cell 2	0.265148
GFP	1	Cell 2	0.2519
GFP	1	Cell 2	0.201945
GFP	1	Cell 2	-0.326288
GFP	1	Cell 2	-0.244125
GFP	1	Cell 2	-0.359141
GFP	1	Cell 2	0.395219
GFP	1	Cell 2	-0.0476141
GFP	1	Cell 2	-0.0917834
GFP	1	Cell 2	-0.17607
GFP	1	Cell 2	-0.23065
GFP	1	Cell 2	-0.376877
GFP	1	Cell 2	-0.480188
GFP	1	Cell 2	-0.39934
GFP	1	Cell 2	-1.92599
GFP	1	Cell 2	-0.734711
GFP	1	Cell 2	-5
GFP	1	Cell 2	-5
GFP	1	Cell 2	-1.0591
GFP	1	Cell 2	-5
GFP	1	Cell 2	0.0408018
GFP	1	Cell 2	-0.919068
GFP	1	Cell 2	-0.430536
GFP	1	Cell 2	0.0439544
GFP	1	Cell 2	-0.0632861
GFP	1	Cell 2	-0.0277236
GFP	1	Cell 2	0.00183559
GFP	1	Cell 2	-0.377746
GFP	1	Cell 2	-0.368655
GFP	1	Cell 2	-0.388656
GFP	1	Cell 2	-1.17641
GFP	1	Cell 2	-5
GFP	1	Cell 2	-5
GFP	1	Cell 2	-5
GFP	1	Cell 2	-5
GFP	1	Cell 2	-0.796085
GFP	1	Cell 2	-5
GFP	1	Cell 2	-5
GFP	1	Cell 2	-0.886836
GFP	1	Cell 2	-0.35337
GFP	1	Cell 2	-0.256309
GFP	1	Cell 2	-0.206617
GFP	1	Cell 2	-0.510341
GFP	1	Cell 2	-0.123387
GFP	1	Cell 2	-0.146679
GFP	1	Cell 2	0.039967
GFP	1	Cell 2	-0.299897
GFP	1	Cell 2	-0.344728
GFP	1	Cell 2	-1.67394
GFP	1	Cell 2	-1.21816
GFP	1	Cell 2	-0.784648
GFP	1	Cell 2	-0.0215228
GFP	1	Cell 2	-0.00753175
GFP	1	Cell 2	-0.0315392
GFP	1	Cell 2	-0.00941183
GFP	1	Cell 2	0.00310614
GFP	1	Cell 2	-0.000295225
GFP	1	Cell 2	-0.00458506
GFP	1	Cell 2	-0.34386
GFP	1	Cell 2	-0.561223
GFP	1	Cell 2	-0.34822
GFP	1	Cell 2	-0.655428
GFP	1	Cell 2	-0.841305
GFP	1	Cell 2	-1.61877
GFP	1	Cell 2	-0.784358
GFP	1	Cell 2	-0.55631
GFP	1	Cell 2	0.311564
GFP	1	Cell 2	0.284039
GFP	1	Cell 2	0.260306
GFP	1	Cell 2	-1.35999
GFP	1	Cell 2	-0.639874
GFP	1	Cell 2	-0.198218
GFP	1	Cell 2	0.112019
GFP	1	Cell 2	0.0975099
GFP	1	Cell 2	0.0812637
GFP	1	Cell 2	-5
GFP	1	Cell 2	-0.820478
GFP	1	Cell 2	-0.951639
GFP	1	Cell 2	-5
GFP	1	Cell 2	-5
GFP	1	Cell 2	-0.837803
GFP	1	Cell 2	-0.0967942
GFP	1	Cell 2	-5
GFP	1	Cell 2	-1.08149
GFP	1	Cell 2	-5
GFP	1	Cell 2	-5
GFP	1	Cell 2	-1.25536
GFP	1	Cell 2	-1.177
GFP	1	Cell 2	-5
GFP	1	Cell 2	-0.614657
GFP	1	Cell 2	-0.43806
GFP	1	Cell 2	-0.448992
GFP	1	Cell 2	-0.680652
GFP	1	Cell 2	0.0728744
GFP	1	Cell 2	0.0915221
GFP	1	Cell 2	0.0312068
GFP	1	Cell 2	-0.356059
GFP	1	Cell 2	-1.07884
GFP	1	Cell 2	-0.624405
GFP	1	Cell 2	-0.638352
GFP	1	Cell 2	-0.701684
GFP	1	Cell 2	-5
GFP	1	Cell 2	-0.524305
GFP	1	Cell 2	-0.202293
GFP	1	Cell 2	-0.0587846
GFP	1	Cell 2	-0.144474
GFP	1	Cell 2	-0.100942
GFP	1	Cell 2	-0.0639756
GFP	1	Cell 2	-0.792212
GFP	1	Cell 2	-2.1746
GFP	1	Cell 2	-1.46092
GFP	1	Cell 2	-0.868129
GFP	1	Cell 2	-1.15889
GFP	1	Cell 2	-1.65779
GFP	1	Cell 2	-5
GFP	1	Cell 2	-0.694607
GFP	1	Cell 2	-0.0630399
GFP	1	Cell 2	-0.141245
GFP	1	Cell 2	0.0755564
GFP	1	Cell 2	0.0141209
GFP	1	Cell 2	-5
GFP	1	Cell 2	-0.456823
GFP	1	Cell 2	-0.959416
GFP	1	Cell 2	-5
GFP	1	Cell 2	-1.36329
GFP	1	Cell 2	-0.0356339
GFP	1	Cell 2	-0.0468182
GFP	1	Cell 2	0.00564361
GFP	1	Cell 2	-1.12161
GFP	1	Cell 2	-0.829144
GFP	1	Cell 2	-0.643811
GFP	1	Cell 2	-0.603046
GFP	1	Cell 2	-0.660424
GFP	1	Cell 2	-0.717354
GFP	1	Cell 2	-5
GFP	1	Cell 2	-0.0633917
GFP	1	Cell 2	-5
GFP	1	Cell 2	-5
GFP	1	Cell 2	-0.0464572
GFP	1	Cell 2	-0.0676288
GFP	1	Cell 2	0.0348017
GFP	1	Cell 2	-0.125072
GFP	1	Cell 2	-0.121655
GFP	1	Cell 2	0.0226519
GFP	1	Cell 2	0.0415802
GFP	1	Cell 2	-0.384559
GFP	1	Cell 2	-0.27633
GFP	1	Cell 2	-0.256267
GFP	1	Cell 2	-0.350443
GFP	1	Cell 2	-5
GFP	1	Cell 2	-5
GFP	1	Cell 2	-5
GFP	1	Cell 2	-0.650275
GFP	1	Cell 2	-1.24822
GFP	1	Cell 2	-0.68296
GFP	1	Cell 2	-1.53968
GFP	1	Cell 2	0.0195672
GFP	1	Cell 2	-5
GFP	1	Cell 2	-0.697639
GFP	1	Cell 2	-0.496895
GFP	1	Cell 2	-0.745889
GFP	1	Cell 2	-1.20599
GFP	1	Cell 2	-1.14717
GFP	1	Cell 2	-0.929327
GFP	1	Cell 2	-1.17433
GFP	1	Cell 2	-0.190371
GFP	1	Cell 2	-0.0709031
GFP	1	Cell 2	-0.147036
GFP	1	Cell 2	-5
GFP	1	Cell 2	-0.13381
GFP	1	Cell 2	-0.228314
GFP	1	Cell 2	-0.411216
GFP	1	Cell 2	-0.318906
GFP	1	Cell 2	0.082969
GFP	1	Cell 2	-0.354744
GFP	1	Cell 2	-0.271477
GFP	1	Cell 2	-0.888067
GFP	1	Cell 2	-5
GFP	1	Cell 2	-0.571241
GFP	1	Cell 2	0.263293
GFP	1	Cell 2	-0.877795
GFP	1	Cell 2	-0.705525
GFP	1	Cell 2	-5
GFP	1	Cell 2	-1.44317
GFP	1	Cell 2	-0.668594
GFP	1	Cell 2	-0.14912
GFP	1	Cell 2	-0.872411
GFP	1	Cell 2	-0.10918
GFP	1	Cell 2	-0.0537709
GFP	1	Cell 2	-0.0820476
GFP	1	Cell 2	-0.0556632
GFP	1	Cell 2	-0.000478015
GFP	1	Cell 2	0.0129543
GFP	1	Cell 2	-0.0766643
GFP	1	Cell 2	0.282202
GFP	1	Cell 2	-0.386939
GFP	1	Cell 2	-0.307421
GFP	1	Cell 2	-5
GFP	1	Cell 2	-5
GFP	1	Cell 2	-1.04213
GFP	1	Cell 2	-1.57264
GFP	1	Cell 2	-1.33346
GFP	1	Cell 2	-1.17135
GFP	1	Cell 2	-5
GFP	1	Cell 2	-1.20469
GFP	1	Cell 2	0.183664
GFP	1	Cell 2	-0.923906
GFP	1	Cell 2	-0.542034
GFP	1	Cell 2	-0.613317
GFP	1	Cell 2	-0.1148
GFP	1	Cell 2	-0.292264
GFP	1	Cell 2	0.232687
GFP	1	Cell 2	0.151708
GFP	1	Cell 2	-0.23871
GFP	1	Cell 2	-0.200114
GFP	1	Cell 2	-0.324565
GFP	1	Cell 2	-0.184383
GFP	1	Cell 2	0.0161447
GFP	1	Cell 2	-0.525108
GFP	1	Cell 2	-0.182165
GFP	1	Cell 2	-0.294584
GFP	1	Cell 2	-0.183059
GFP	1	Cell 2	0.282188
GFP	1	Cell 2	0.158661
GFP	1	Cell 2	-0.0422223
GFP	1	Cell 2	-1.47993
GFP	1	Cell 2	-1.84413
GFP	1	Cell 2	-0.542863
GFP	1	Cell 2	-0.556649
GFP	1	Cell 2	-0.411248
GFP	1	Cell 2	-0.40856
GFP	1	Cell 2	-5
GFP	1	Cell 2	-1.53713
GFP	1	Cell 2	-0.3576
GFP	1	Cell 2	-0.20555
GFP	1	Cell 2	-0.228685
GFP	1	Cell 2	-0.552291
GFP	1	Cell 2	-1.06361
GFP	1	Cell 2	0.266442
GFP	1	Cell 2	-0.194986
GFP	1	Cell 2	-0.695535
GFP	1	Cell 2	-2.62708
GFP	1	Cell 2	-5
GFP	1	Cell 2	-0.66765
GFP	1	Cell 2	0.0550655
GFP	1	Cell 2	0.116051
GFP	1	Cell 2	-0.51286
GFP	1	Cell 2	-1.2045
GFP	1	Cell 2	-0.430112
GFP	1	Cell 2	-0.370921
GFP	1	Cell 2	0.315484
GFP	1	Cell 2	-0.801318
GFP	1	Cell 2	-0.985135
GFP	1	Cell 2	-0.901081
GFP	1	Cell 2	-0.426517
GFP	1	Cell 2	-5
GFP	1	Cell 2	-2.58323
GFP	1	Cell 2	-0.71997
GFP	1	Cell 2	-0.427875
GFP	1	Cell 2	-0.310256
GFP	1	Cell 2	-0.41209
GFP	1	Cell 2	-1.06092
GFP	1	Cell 2	-5
GFP	1	Cell 2	-1.25326
GFP	1	Cell 2	-1.28848
GFP	1	Cell 2	-0.581666
GFP	1	Cell 2	-0.618127
GFP	1	Cell 2	-0.50305
GFP	1	Cell 2	-0.515026
GFP	1	Cell 2	-0.554918
GFP	1	Cell 2	-1.68312
GFP	1	Cell 2	-0.592245
GFP	1	Cell 2	-0.631825
GFP	1	Cell 2	-0.52078
GFP	1	Cell 2	-0.046608
[truncated: 30,573 more rows]
