# Supplementary material for: Interdependence of plasma membrane nanoscale dynamics of a kinase and its cognate substrate underlies Arabidopsis response to viral infection
Source: eLife. 2025 May 2;12:RP90309. doi: 10.7554/eLife.90309 (PMC12048157; doi:10.7554/eLife.90309)
Supplement: Figure 2—source data 3. [file elife-90309-fig2-data3.xlsx]

## Sheet: Feuil1
Non-linear fit of the values presented in "source data Figure 2E"
Gaussian
Best-fit values	exp1_GFP_cell1	exp1_GFP_cell2	exp1_GFP_cell3	exp1_PlAMV_cell1	exp1_PlAMV_cell2	exp1_PlAMV_cell3	exp2_GFP_cell1	exp2_GFP_cell2	exp2_GFP_cell3	exp2_PlAMV_cell1	exp2_PlAMV_cell2	exp2_PlAMV_cell3	exp3_GFP_cell1	exp3_GFP_cell2	exp3_GFP_cell3	exp3_GFP_cell4	exp3_PlAMV_cell1	exp3_PlAMV_cell2	exp3_PlAMV_cell3	exp3_PlAMV_cell4
Amplitude	231.7	99.6	138.7	51.05	70.98	63.66	95.97	241.7	196.9	391.2	216	76.09	456.1	489.6	439.4	449.7	105.6	270.4	59.38	37.46
Mean	-0.384	-0.358	-0.3493	-0.3029	-0.4584	-0.481	-0.479	-0.4579	-0.4193	-0.4922	-0.5122	-0.5696	-0.4399	-0.3867	-0.3725	-0.4239	-0.396	-0.527	-0.403	-0.7247
SD	0.3974	0.5252	0.5307	0.6354	0.4619	0.5386	0.4375	0.4765	0.3914	0.4791	0.5351	0.5174	0.4313	0.4598	0.4896	0.3994	0.461	0.449	0.8174	0.7087
95% CI (profile likelihood)
Amplitude	188,1 to 280,0	90,44 to 109,4	122,2 to 156,4	47,10 to 55,13	64,14 to 78,11	55,22 to 72,72	86,67 to 105,7	215,2 to 269,6	172,2 to 222,9	339,1 to 447,2	192,8 to 240,4	67,14 to 85,54	410,4 to 503,8	433,6 to 549,3	390,4 to 491,9	406,4 to 494,9	93,43 to 118,6	235,0 to 307,8	52,98 to 66,18	33,25 to 41,85
Mean	-0,4742 to -0,2654	-0,4283 to -0,2515	-0,4413 to -0,1898	-0,4028 to -0,1305	-0,5128 to -0,3960	-0,5689 to -0,3600	-0,5291 to -0,4250	-0,5222 to -0,3817	-0,4760 to -0,3576	-0,5674 to -0,4068	-0,5814 to -0,4289	-0,6422 to -0,4905	-0,4897 to -0,3844	-0,4521 to -0,2991	-0,4449 to -0,2659	-0,4677 to -0,3767	-0,4610 to -0,3095	-0,5945 to -0,4573	-0,5621 to -0,06518	-0,8267 to -0,5989
SD	0,2934 to 0,5750	0,4375 to 0,6471	0,4229 to 0,7019	0,5352 to 0,7859	0,3987 to 0,5449	0,4305 to 0,7040	0,3792 to 0,5119	0,4017 to 0,5796	0,3241 to 0,4868	0,3871 to 0,6097	0,4489 to 0,6537	0,4337 to 0,6292	0,3683 to 0,5157	0,3777 to 0,5795	0,4001 to 0,6222	0,3441 to 0,4714	0,3771 to 0,5816	0,3694 to 0,5603	0,6397 to 1,112	0,5992 to 0,8630
Goodness of Fit
Degrees of Freedom	15	15	15	18	18	18	19	19	19	20	20	20	20	20	20	20	19	19	19	19
R squared	0.8955	0.9704	0.9491	0.9712	0.9645	0.9335	0.9642	0.9524	0.9442	0.9309	0.9519	0.9413	0.9625	0.9495	0.9499	0.9663	0.9492	0.9368	0.9359	0.9326
Sum of Squares	12767	732.9	2478	215.8	462.6	777.9	858.6	7590	5180	29732	6536	1002	19939	32650	27164	16664	1440	12059	739.8	300.3
Sy.x	29.17	6.99	12.85	3.462	5.069	6.574	6.722	19.99	16.51	38.56	18.08	7.077	31.57	40.4	36.85	28.87	8.706	25.19	6.24	3.975
Constraints
SD	SD > 0	SD > 0	SD > 0	SD > 0	SD > 0	SD > 0	SD > 0	SD > 0	SD > 0	SD > 0	SD > 0	SD > 0	SD > 0	SD > 0	SD > 0	SD > 0	SD > 0	SD > 0	SD > 0	SD > 0
Number of points
# of X values	18	18	18	21	21	21	22	22	22	23	23	23	23	23	23	23	22	22	22	22
# Y values analyzed	18	18	18	21	21	21	22	22	22	23	23	23	23	23	23	23	22	22	22	22
Peak value (Mean from Gaussian fit)			Statistical analysis
GFP	PlAMV		Column B	PlAMV
-0.384	-0.3029		vs.	vs,
-0.358	-0.4584		Column A	GFP
-0.3493	-0.481
-0.479	-0.4922		Mann Whitney test
-0.4579	-0.5122		P value	0.0288
-0.4193	-0.5696		Exact or approximate P value?	Exact
-0.4399	-0.396		P value summary	*
-0.3867	-0.527		Significantly different (P < 0.05)?	Yes
-0.3725	-0.403		One- or two-tailed P value?	Two-tailed
-0.4239	-0.7247		Sum of ranks in column A,B	134 , 76
			Mann-Whitney U	21
			Difference between medians
			Median of column A	-0,4030, n=10
			Median of column B	-0,4866, n=10
			Difference: Actual	-0.0836
			Difference: Hodges-Lehmann	-0.0726
			3Cell
