# Supplementary material for: Interdependence of plasma membrane nanoscale dynamics of a kinase and its cognate substrate underlies Arabidopsis response to viral infection
Source: eLife. 2025 May 2;12:RP90309. doi: 10.7554/eLife.90309 (PMC12048157; doi:10.7554/eLife.90309)
Supplement: Figure 2—source data 4. [file elife-90309-fig2-data4.xlsx]

## Sheet: Feuil1
Condition	Experiment	Cell	interval	MSD
GFP	1	Cell 1	x0	-0.112735
GFP	1	Cell 1	x0	-0.0608854
GFP	1	Cell 1	x0	0.124666
GFP	1	Cell 1	x0	-0.0447515
GFP	1	Cell 1	x0	0.0149007
GFP	1	Cell 1	x0	0.142725
GFP	1	Cell 1	x0	0.117497
GFP	1	Cell 1	x0	-0.0448339
GFP	1	Cell 1	x0	-0.0683822
GFP	1	Cell 1	x0	-0.113507
GFP	1	Cell 1	x0	0.0265838
GFP	1	Cell 1	x0	0.136317
GFP	1	Cell 1	x0	-0.0638891
GFP	1	Cell 1	x0	0.172273
GFP	1	Cell 1	x0	-0.0718671
GFP	1	Cell 1	x0	0.0337889
GFP	1	Cell 1	x0	-0.149945
GFP	1	Cell 1	x0	-0.231768
GFP	1	Cell 1	x0	-0.0536938
GFP	1	Cell 1	x0	0.057512
GFP	1	Cell 1	x0	-0.220223
GFP	1	Cell 1	x0	0.264902
GFP	1	Cell 1	x0	0.14713
GFP	1	Cell 1	x0	-0.196354
GFP	1	Cell 1	x0	0.16918
GFP	1	Cell 1	x0	0.0695357
GFP	1	Cell 1	x0	0.052277
GFP	1	Cell 1	x0	-0.345042
GFP	1	Cell 1	x0	-0.418168
GFP	1	Cell 1	x0	0.0827018
GFP	1	Cell 1	x0	-0.0786069
GFP	1	Cell 1	x0	0.0170823
GFP	1	Cell 1	x0	0.0226814
GFP	1	Cell 1	x0	-0.0727658
GFP	1	Cell 1	x0	0.0573387
GFP	1	Cell 1	x0	-0.288636
GFP	1	Cell 1	x0	-0.0372183
GFP	1	Cell 1	x0	0.0900645
GFP	1	Cell 1	x0	0.26017
GFP	1	Cell 1	x0	0.00586059
GFP	1	Cell 1	x0	-0.0391522
GFP	1	Cell 1	x0	0.256294
GFP	1	Cell 1	x0	-0.076689
GFP	1	Cell 1	x0	-0.0575408
GFP	1	Cell 1	x0	0.136977
GFP	1	Cell 1	x0	-0.0400816
GFP	1	Cell 1	x0	-0.256025
GFP	1	Cell 1	x0	-0.196336
GFP	1	Cell 1	x0	0.019085
GFP	1	Cell 1	x0	-0.170746
GFP	1	Cell 1	x0	0.0308169
GFP	1	Cell 1	x0	-0.023612
GFP	1	Cell 1	x0	-0.0456108
GFP	1	Cell 1	x0	-0.204856
GFP	1	Cell 1	x0	0.0177562
GFP	1	Cell 1	x0	0.0946155
GFP	1	Cell 1	x0	0.121244
GFP	1	Cell 1	x0	-0.0212077
GFP	1	Cell 1	x0	-0.0106869
GFP	1	Cell 1	x0	0.0630386
GFP	1	Cell 1	x0	-0.12479
GFP	1	Cell 1	x0	-0.181075
GFP	1	Cell 1	x0	-0.304398
GFP	1	Cell 1	x0	0.080921
GFP	1	Cell 1	x0	-0.0215048
GFP	1	Cell 1	x0	0.0065099
GFP	1	Cell 1	x0	0.0244192
GFP	1	Cell 1	x0	-0.0897498
GFP	1	Cell 1	x0	-0.000109801
GFP	1	Cell 1	x0	-0.110916
GFP	1	Cell 1	x0	-0.0742929
GFP	1	Cell 1	x0	-0.37876
GFP	1	Cell 1	x0	-0.292919
GFP	1	Cell 1	x0	-0.24289
GFP	1	Cell 1	x0	-0.219322
GFP	1	Cell 1	x0	-0.211784
GFP	1	Cell 1	x0	-0.238288
GFP	1	Cell 1	x0	0.118584
GFP	1	Cell 1	x0	0.331802
GFP	1	Cell 1	x0	-0.00158682
GFP	1	Cell 1	x0	0.295721
GFP	1	Cell 1	x0	0.060591
GFP	1	Cell 1	x0	0.161271
GFP	1	Cell 1	x0	-0.0428279
GFP	1	Cell 1	x0	0.0552784
GFP	1	Cell 1	x0	-0.0348227
GFP	1	Cell 1	x0	0.19392
GFP	1	Cell 1	x0	-0.00763629
GFP	1	Cell 1	x0	0.223355
GFP	1	Cell 1	x0	0.0113027
GFP	1	Cell 1	x0	0.180429
GFP	1	Cell 1	x0	-0.271746
GFP	1	Cell 1	x0	-0.329742
GFP	1	Cell 1	x0	-0.102707
GFP	1	Cell 1	x0	-0.187978
GFP	1	Cell 1	x0	0.504045
GFP	1	Cell 1	x0	-0.0354887
GFP	1	Cell 1	x0	0.276637
GFP	1	Cell 1	x0	-0.00925619
GFP	1	Cell 1	x0	-0.323053
GFP	1	Cell 1	x0	0.0395655
GFP	1	Cell 1	x0	0.0346525
GFP	1	Cell 1	x0	0.217859
GFP	1	Cell 1	x0	0.0106412
GFP	1	Cell 1	x0	-0.0028692
GFP	1	Cell 1	x0	0.101815
GFP	1	Cell 1	x0	0.238453
GFP	1	Cell 1	x0	0.111797
GFP	1	Cell 1	x0	0.0174493
GFP	1	Cell 1	x0	-0.0858616
GFP	1	Cell 1	x0	0.120783
GFP	1	Cell 1	x0	0.0250758
GFP	1	Cell 1	x0	0.0264252
GFP	1	Cell 1	x0	0.283555
GFP	1	Cell 1	x0	-0.0531145
GFP	1	Cell 1	x0	-0.222336
GFP	1	Cell 1	x0	-0.15523
GFP	1	Cell 1	x0	-0.09243
GFP	1	Cell 1	x0	-0.104033
GFP	1	Cell 1	x0	0.209223
GFP	1	Cell 1	x0	0.0163964
GFP	1	Cell 1	x0	-0.126447
GFP	1	Cell 1	x0	0.0220198
GFP	1	Cell 1	x0	0.124203
GFP	1	Cell 1	x0	0.0656602
GFP	1	Cell 1	x0	-0.0248002
GFP	1	Cell 1	x0	-0.253385
GFP	1	Cell 1	x0	0.0678161
GFP	1	Cell 1	x0	-0.0441734
GFP	1	Cell 1	x0	-0.039829
GFP	1	Cell 1	x0	0.0955905
GFP	1	Cell 1	x0	0.248715
GFP	1	Cell 1	x0	-0.0835735
GFP	1	Cell 1	x0	0.128616
GFP	1	Cell 1	x0	-0.0797965
GFP	1	Cell 1	x0	0.0302134
GFP	1	Cell 1	x0	0.0851507
GFP	1	Cell 1	x0	0.0511873
GFP	1	Cell 1	x0	0.28277
GFP	1	Cell 1	x0	-0.0506323
GFP	1	Cell 1	x0	0.10577
GFP	1	Cell 1	x0	-0.0512709
GFP	1	Cell 1	x0	-0.019396
GFP	1	Cell 1	x0	-0.00434603
GFP	1	Cell 1	x0	0.0139134
GFP	1	Cell 1	x0	0.0135846
GFP	1	Cell 1	x0	0.243034
GFP	1	Cell 1	x0	-0.159887
GFP	1	Cell 1	x0	-0.18085
GFP	1	Cell 1	x0	0.0828631
GFP	1	Cell 1	x0	0.0968933
GFP	1	Cell 1	x0	0.102773
GFP	1	Cell 1	x0	0.0382566
GFP	1	Cell 1	x0	-0.186497
GFP	1	Cell 1	x0	0.150518
GFP	1	Cell 1	x0	-0.0534961
GFP	1	Cell 1	x0	0.117671
GFP	1	Cell 1	x0	0.114164
GFP	1	Cell 1	x0	-0.0795602
GFP	1	Cell 1	x0	0.293674
GFP	1	Cell 1	x0	0.103033
GFP	1	Cell 1	x0	0.0516931
GFP	1	Cell 1	x0	0.0331497
GFP	1	Cell 1	x0	0.119167
GFP	1	Cell 1	x0	-0.0386875
GFP	1	Cell 1	x0	-0.0816473
GFP	1	Cell 1	x0	0.0259704
GFP	1	Cell 1	x0	-0.034415
GFP	1	Cell 1	x0	0.0421515
GFP	1	Cell 1	x0	-0.0161034
GFP	1	Cell 1	x0	-0.0280702
GFP	1	Cell 1	x0	-0.119412
GFP	1	Cell 1	x0	0.0943696
GFP	1	Cell 1	x0	0.0276194
GFP	1	Cell 1	x0	-0.127747
GFP	1	Cell 1	x0	-0.287345
GFP	1	Cell 1	x0	-0.24066
GFP	1	Cell 1	x0	0.0680037
GFP	1	Cell 1	x0	0.217432
GFP	1	Cell 1	x0	0.538022
GFP	1	Cell 1	x0	0.0648323
GFP	1	Cell 1	x0	-0.076873
GFP	1	Cell 1	x0	0.103336
GFP	1	Cell 1	x0	-0.0585774
GFP	1	Cell 1	x0	-0.104742
GFP	1	Cell 1	x0	0.088994
GFP	1	Cell 1	x0	0.0667172
GFP	1	Cell 1	x0	0.0767446
GFP	1	Cell 1	x0	-0.035363
GFP	1	Cell 1	x0	0.0269353
GFP	1	Cell 1	x0	-0.000532618
GFP	1	Cell 1	x0	0.0615775
GFP	1	Cell 1	x0	-0.263126
GFP	1	Cell 1	x0	-0.299459
GFP	1	Cell 1	x0	-0.341349
GFP	1	Cell 1	x0	-0.271054
GFP	1	Cell 1	x0	-0.197233
GFP	1	Cell 1	x0	-0.193459
GFP	1	Cell 1	x0	-0.142451
GFP	1	Cell 1	x0	-0.142627
GFP	1	Cell 1	x0	0.0169369
GFP	1	Cell 1	x0	0.00626195
GFP	1	Cell 1	x0	-0.00802457
GFP	1	Cell 1	x0	0.0708008
GFP	1	Cell 1	x0	-0.0592973
GFP	1	Cell 1	x0	0.0106778
GFP	1	Cell 1	x0	0.16757
GFP	1	Cell 1	x0	0.016442
GFP	1	Cell 1	x0	-0.127713
GFP	1	Cell 1	x0	0.00357856
GFP	1	Cell 1	x0	-0.0408886
GFP	1	Cell 1	x0	0.0910693
GFP	1	Cell 1	x0	-0.0975434
GFP	1	Cell 1	x0	0.0403204
GFP	1	Cell 1	x0	-0.254934
GFP	1	Cell 1	x0	0.106359
GFP	1	Cell 1	x0	0.106121
GFP	1	Cell 1	x0	0.27673
GFP	1	Cell 1	x0	-0.0396646
GFP	1	Cell 1	x0	0.0813881
GFP	1	Cell 1	x0	0.00934538
GFP	1	Cell 1	x0	-0.0935918
GFP	1	Cell 1	x0	0.0604763
GFP	1	Cell 1	x0	-0.114344
GFP	1	Cell 1	x0	-0.140063
GFP	1	Cell 1	x0	0.0985603
GFP	1	Cell 1	x0	0.126022
GFP	1	Cell 1	x0	0.12355
GFP	1	Cell 1	x0	0.0507799
GFP	1	Cell 1	x0	0.129309
GFP	1	Cell 1	x0	0.0207468
GFP	1	Cell 1	x0	0.269002
GFP	1	Cell 1	x0	0.131112
GFP	1	Cell 1	x0	0.241676
GFP	1	Cell 1	x0	0.103765
GFP	1	Cell 1	x0	-0.118084
GFP	1	Cell 1	x0	-0.120389
GFP	1	Cell 1	x0	-0.160363
GFP	1	Cell 1	x0	-0.317556
GFP	1	Cell 1	x0	-0.351011
GFP	1	Cell 1	x0	0.0561851
GFP	1	Cell 1	x0	-0.269948
GFP	1	Cell 1	x0	-0.0745435
GFP	1	Cell 1	x0	-0.309697
GFP	1	Cell 1	x0	-0.090703
GFP	1	Cell 1	x0	-0.312457
GFP	1	Cell 1	x0	-0.197859
GFP	1	Cell 1	x0	-0.0880769
GFP	1	Cell 1	x0	-0.116677
GFP	1	Cell 1	x0	-0.219138
GFP	1	Cell 1	x0	-0.222059
GFP	1	Cell 1	x0	0.223323
GFP	1	Cell 1	x0	0.0935483
GFP	1	Cell 1	x0	-0.00840637
GFP	1	Cell 1	x0	0.165656
GFP	1	Cell 1	x0	-0.0587216
GFP	1	Cell 1	x0	-0.148454
GFP	1	Cell 1	x0	-0.236072
GFP	1	Cell 1	x0	-0.048152
GFP	1	Cell 1	x0	-0.0224657
GFP	1	Cell 1	x0	0.243577
GFP	1	Cell 1	x0	0.0362778
GFP	1	Cell 1	x0	-0.0241601
GFP	1	Cell 1	x0	-0.070349
GFP	1	Cell 1	x0	-0.00458149
GFP	1	Cell 1	x0	0.200831
GFP	1	Cell 1	x0	0.0214447
GFP	1	Cell 1	x0	0.0114701
GFP	1	Cell 1	x0	0.0982854
GFP	1	Cell 1	x0	0.134538
GFP	1	Cell 1	x0	-0.00997597
GFP	1	Cell 1	x0	0.0527435
GFP	1	Cell 1	x0	0.238358
GFP	1	Cell 1	x0	-0.0276736
GFP	1	Cell 1	x0	-0.0510608
GFP	1	Cell 1	x0	-0.0506885
GFP	1	Cell 1	x0	-0.0626534
GFP	1	Cell 1	x0	-0.0610717
GFP	1	Cell 1	x0	0.0573191
GFP	1	Cell 1	x0	-0.1178
GFP	1	Cell 1	x0	0.106508
GFP	1	Cell 1	x0	-0.0118487
GFP	1	Cell 1	x0	0.16943
GFP	1	Cell 1	x0	-0.0402714
GFP	1	Cell 1	x0	-0.223119
GFP	1	Cell 1	x0	-0.188281
GFP	1	Cell 1	x0	-0.0723583
GFP	1	Cell 1	x0	-0.0710617
GFP	1	Cell 1	x0	0.147418
GFP	1	Cell 1	x0	0.168791
GFP	1	Cell 1	x0	0.0518902
GFP	1	Cell 1	x0	0.147637
GFP	1	Cell 1	x0	-0.0169212
GFP	1	Cell 1	x0	0.0700385
GFP	1	Cell 1	x0	-0.205019
GFP	1	Cell 1	x0	-0.101314
GFP	1	Cell 1	x0	-0.185478
GFP	1	Cell 1	x0	0.0485377
GFP	1	Cell 1	x0	-0.158528
GFP	1	Cell 1	x0	0.104175
GFP	1	Cell 1	x0	0.00563424
GFP	1	Cell 1	x0	-0.248054
GFP	1	Cell 1	x0	-0.0578842
GFP	1	Cell 1	x0	-0.132221
GFP	1	Cell 1	x0	-0.262091
GFP	1	Cell 1	x0	-0.200706
GFP	1	Cell 1	x0	-0.224168
GFP	1	Cell 1	x0	-0.11538
GFP	1	Cell 1	x0	-0.00927413
GFP	1	Cell 1	x0	0.0536369
GFP	1	Cell 1	x0	-0.0467466
GFP	1	Cell 1	x0	-0.219819
GFP	1	Cell 1	x0	0.114435
GFP	1	Cell 1	x0	0.0525974
GFP	1	Cell 1	x0	0.0448631
GFP	1	Cell 1	x0	0.0889052
GFP	1	Cell 1	x0	0.0138895
GFP	1	Cell 1	x0	-0.43939
GFP	1	Cell 1	x0	-0.0722391
GFP	1	Cell 1	x0	-0.0826473
GFP	1	Cell 1	x0	-0.0426809
GFP	1	Cell 1	x0	-0.164793
GFP	1	Cell 1	x0	0.0122608
GFP	1	Cell 1	x0	0.0567998
GFP	1	Cell 1	x0	0.107882
GFP	1	Cell 1	x0	-0.211231
GFP	1	Cell 1	x0	-0.253856
GFP	1	Cell 1	x0	-0.320893
GFP	1	Cell 1	x0	-0.150918
GFP	1	Cell 1	x0	-0.112528
GFP	1	Cell 1	x0	-0.0625287
GFP	1	Cell 1	x0	0.0195244
GFP	1	Cell 1	x0	-0.208316
GFP	1	Cell 1	x0	-0.0144514
GFP	1	Cell 1	x0	-0.0293535
GFP	1	Cell 1	x0	0.188
GFP	1	Cell 1	x0	0.0117147
GFP	1	Cell 1	x0	0.0294542
GFP	1	Cell 1	x0	-0.00656599
GFP	1	Cell 1	x0	-0.0397582
GFP	1	Cell 1	x0	-0.0354641
GFP	1	Cell 1	x0	-0.0342072
GFP	1	Cell 1	x0	0.108587
GFP	1	Cell 1	x0	0.0964651
GFP	1	Cell 1	x0	-0.00479065
GFP	1	Cell 1	x0	0.102203
GFP	1	Cell 1	x0	0.268376
GFP	1	Cell 1	x0	0.372288
GFP	1	Cell 1	x0	0.0914917
GFP	1	Cell 1	x0	-0.242689
GFP	1	Cell 1	x0	-0.397244
GFP	1	Cell 1	x0	0.0312545
GFP	1	Cell 1	x0	-0.0806983
GFP	1	Cell 1	x0	0.0768968
GFP	1	Cell 1	x0	0.220719
GFP	1	Cell 1	x0	-0.0594339
GFP	1	Cell 1	x0	0.0913817
GFP	1	Cell 1	x0	-0.0266479
GFP	1	Cell 1	x0	-0.138785
GFP	1	Cell 1	x0	0.101287
GFP	1	Cell 1	x0	0.153758
GFP	1	Cell 1	x0	-0.0010199
GFP	1	Cell 1	x0	-0.333442
GFP	1	Cell 1	x0	-0.339161
GFP	1	Cell 1	x0	-0.120681
GFP	1	Cell 1	x0	-0.317647
GFP	1	Cell 1	x0	0.125089
GFP	1	Cell 1	x0	0.235141
GFP	1	Cell 1	x0	0.0708881
GFP	1	Cell 1	x0	-0.301274
GFP	1	Cell 1	x0	0.0245039
GFP	1	Cell 1	x0	0.235756
GFP	1	Cell 1	x0	-0.113562
GFP	1	Cell 1	x0	0.289021
GFP	1	Cell 1	x0	0.231311
GFP	1	Cell 1	x0	-0.0598604
GFP	1	Cell 1	x0	-0.192401
GFP	1	Cell 1	x0	-0.17295
GFP	1	Cell 1	x0	-0.166254
GFP	1	Cell 1	x0	0.178749
GFP	1	Cell 1	x0	0.000588811
GFP	1	Cell 1	x0	-0.0431
GFP	1	Cell 1	x0	0.0788388
GFP	1	Cell 1	x0	0.0647651
GFP	1	Cell 1	x0	0.153938
GFP	1	Cell 1	x0	-0.857414
GFP	1	Cell 1	x0	-1.20952
GFP	1	Cell 1	x0	-1.31362
GFP	1	Cell 1	x0	-1.28632
GFP	1	Cell 1	x0	-1.02013
GFP	1	Cell 1	x0	-1.10848
GFP	1	Cell 1	x0	0.0321229
GFP	1	Cell 1	x0	-0.196264
GFP	1	Cell 1	x0	-0.026831
GFP	1	Cell 1	x0	0.04638
GFP	1	Cell 1	x0	0.00465725
GFP	1	Cell 1	x0	-0.00982704
GFP	1	Cell 1	x0	-0.00450381
GFP	1	Cell 1	x0	0.0227772
GFP	1	Cell 1	x0	-0.159157
GFP	1	Cell 1	x0	0.034582
GFP	1	Cell 1	x0	0.00953311
GFP	1	Cell 1	x0	-0.0288581
GFP	1	Cell 1	x0	-0.0605061
GFP	1	Cell 1	x0	-0.357417
GFP	1	Cell 1	x0	-0.0216379
GFP	1	Cell 1	x0	0.0245108
GFP	1	Cell 1	x0	-0.0290105
GFP	1	Cell 1	x0	0.00530172
GFP	1	Cell 1	x0	0.215343
GFP	1	Cell 1	x0	-0.0661933
GFP	1	Cell 1	x0	-0.109651
GFP	1	Cell 1	x0	0.328552
GFP	1	Cell 1	x0	0.271236
GFP	1	Cell 1	x0	-0.0755507
GFP	1	Cell 1	x0	-0.119515
GFP	1	Cell 1	x0	-0.241874
GFP	1	Cell 1	x0	0.0848081
GFP	1	Cell 1	x0	0.0356704
GFP	1	Cell 1	x0	0.0182153
GFP	1	Cell 1	x0	0.0353365
GFP	1	Cell 1	x0	0.0388482
GFP	1	Cell 1	x0	-0.0199808
GFP	1	Cell 1	x0	-0.068237
GFP	1	Cell 1	x0	0.0324873
GFP	1	Cell 1	x0	0.0989745
GFP	1	Cell 1	x0	0.0244181
GFP	1	Cell 1	x0	-0.0866799
GFP	1	Cell 1	x0	-0.238328
GFP	1	Cell 1	x0	0.00890006
GFP	1	Cell 1	x0	-0.0169964
GFP	1	Cell 1	x0	0.0365833
GFP	1	Cell 1	x0	-0.120587
GFP	1	Cell 1	x0	-0.0295109
GFP	1	Cell 1	x0	-0.110758
GFP	1	Cell 1	x0	-0.0586064
GFP	1	Cell 1	x0	0.0386581
GFP	1	Cell 1	x0	0.0340438
GFP	1	Cell 1	x0	-0.0948789
GFP	1	Cell 1	x0	-0.00871664
GFP	1	Cell 1	x0	-0.103227
GFP	1	Cell 1	x0	0.0113429
GFP	1	Cell 1	x0	0.0818131
GFP	1	Cell 1	x0	-0.00433117
GFP	1	Cell 1	x0	-0.172719
GFP	1	Cell 1	x0	-0.213084
GFP	1	Cell 1	x0	-0.289776
GFP	1	Cell 1	x0	-0.160756
GFP	1	Cell 1	x0	-0.300222
GFP	1	Cell 1	x0	0.0807113
GFP	1	Cell 1	x0	-0.0516435
GFP	1	Cell 1	x0	-0.0706115
GFP	1	Cell 1	x0	-0.0248791
GFP	1	Cell 1	x0	0.0902378
GFP	1	Cell 1	x0	-0.119019
GFP	1	Cell 1	x0	-0.0341229
GFP	1	Cell 1	x0	-0.00630952
GFP	1	Cell 1	x0	0.069881
GFP	1	Cell 1	x0	-0.0325118
GFP	1	Cell 1	x0	-0.57146
GFP	1	Cell 1	x0	-0.798099
GFP	1	Cell 1	x0	-0.211289
GFP	1	Cell 1	x0	-0.320773
GFP	1	Cell 1	x0	-0.064433
GFP	1	Cell 1	x0	-0.04291
GFP	1	Cell 1	x0	0.265157
GFP	1	Cell 1	x0	0.0683343
GFP	1	Cell 1	x0	0.0502953
GFP	1	Cell 1	x0	-0.101593
GFP	1	Cell 1	x0	-0.136728
GFP	1	Cell 1	x0	-0.194907
GFP	1	Cell 1	x0	0.01103
GFP	1	Cell 1	x0	-0.00528783
GFP	1	Cell 1	x0	0.0148969
GFP	1	Cell 1	x0	-0.0251825
GFP	1	Cell 1	x0	0.11853
GFP	1	Cell 1	x0	0.088353
GFP	1	Cell 1	x0	0.0349135
GFP	1	Cell 1	x0	0.195669
GFP	1	Cell 1	x0	0.216653
GFP	1	Cell 1	x0	0.240541
GFP	1	Cell 1	x0	0.0114774
GFP	1	Cell 1	x0	-0.163612
GFP	1	Cell 1	x0	-0.126589
GFP	1	Cell 1	x0	-0.0204802
GFP	1	Cell 1	x0	0.0582484
GFP	1	Cell 1	x0	0.00628198
GFP	1	Cell 1	x0	-0.0237117
GFP	1	Cell 1	x0	-0.0748169
GFP	1	Cell 1	x0	-0.1145
GFP	1	Cell 1	x0	-0.00539326
GFP	1	Cell 1	x0	0.105873
GFP	1	Cell 1	x0	-0.097347
GFP	1	Cell 1	x0	-0.192658
GFP	1	Cell 1	x0	-0.290104
GFP	1	Cell 1	x0	0.0444989
GFP	1	Cell 1	x0	-0.0891708
GFP	1	Cell 1	x0	-0.212055
GFP	1	Cell 1	x0	-0.165993
GFP	1	Cell 1	x0	0.210191
GFP	1	Cell 1	x0	0.17804
GFP	1	Cell 1	x0	-0.51719
GFP	1	Cell 1	x0	-0.904346
GFP	1	Cell 1	x0	-0.805987
GFP	1	Cell 1	x0	-0.016894
GFP	1	Cell 1	x0	-0.112606
GFP	1	Cell 1	x0	0.139698
GFP	1	Cell 1	x0	-0.197394
GFP	1	Cell 1	x0	0.11642
GFP	1	Cell 1	x0	0.0227173
GFP	1	Cell 1	x0	0.00396476
GFP	1	Cell 1	x0	0.0210123
GFP	1	Cell 1	x0	0.163822
GFP	1	Cell 1	x0	-0.143974
GFP	1	Cell 1	x0	-0.241679
GFP	1	Cell 1	x0	0.00057841
GFP	1	Cell 1	x0	0.326661
GFP	1	Cell 1	x0	-0.355709
GFP	1	Cell 1	x0	-0.00668572
GFP	1	Cell 1	x0	0.00971983
GFP	1	Cell 1	x0	-0.386352
GFP	1	Cell 1	x0	-0.569548
GFP	1	Cell 1	x0	-0.541907
GFP	1	Cell 1	x0	0.00433003
GFP	1	Cell 1	x0	0.255817
GFP	1	Cell 1	x0	0.244994
GFP	1	Cell 1	x0	-0.0553791
GFP	1	Cell 1	x0	0.0890681
GFP	1	Cell 1	x0	0.124405
GFP	1	Cell 1	x0	0.281415
GFP	1	Cell 1	x0	-0.0461098
GFP	1	Cell 1	x0	-0.296318
GFP	1	Cell 1	x0	-0.321546
GFP	1	Cell 1	x0	0.0502881
GFP	1	Cell 1	x0	-0.0897811
GFP	1	Cell 1	x0	0.0482319
GFP	1	Cell 1	x0	-0.112264
GFP	1	Cell 1	x0	-0.103278
GFP	1	Cell 1	x0	-0.105403
GFP	1	Cell 1	x0	0.0605428
GFP	1	Cell 1	x0	-0.185598
GFP	1	Cell 1	x0	-0.329692
GFP	1	Cell 1	x0	-0.350513
GFP	1	Cell 1	x0	-0.517678
GFP	1	Cell 1	x0	0.0639156
GFP	1	Cell 1	x0	0.310088
GFP	1	Cell 1	x0	0.244801
GFP	1	Cell 1	x0	0.163839
GFP	1	Cell 1	x0	0.0170307
GFP	1	Cell 1	x0	-0.0507617
GFP	1	Cell 1	x0	-0.248163
GFP	1	Cell 1	x0	0.071669
GFP	1	Cell 1	x0	-0.0216631
GFP	1	Cell 1	x0	-0.15519
GFP	1	Cell 1	x0	-0.100728
GFP	1	Cell 1	x0	0.00196445
GFP	1	Cell 1	x0	0.082756
GFP	1	Cell 1	x0	0.133252
GFP	1	Cell 1	x0	-0.0427302
GFP	1	Cell 1	x0	-0.0529938
GFP	1	Cell 1	x0	0.00245593
GFP	1	Cell 1	x0	0.152295
GFP	1	Cell 1	x0	0.0617167
GFP	1	Cell 1	x0	0.0442572
GFP	1	Cell 1	x0	-0.0685661
GFP	1	Cell 1	x0	0.00869748
GFP	1	Cell 1	x0	-0.0496735
GFP	1	Cell 1	x0	0.0529891
GFP	1	Cell 1	x0	0.105062
GFP	1	Cell 1	x0	0.050191
GFP	1	Cell 1	x0	0.0933445
GFP	1	Cell 1	x0	0.200886
GFP	1	Cell 1	x0	0.0159399
GFP	1	Cell 1	x0	0.0217787
GFP	1	Cell 1	x0	-0.00171198
GFP	1	Cell 1	x0	0.00517131
GFP	1	Cell 1	x0	0.257701
GFP	1	Cell 1	x0	0.136553
GFP	1	Cell 1	x0	0.0435026
GFP	1	Cell 1	x0	0.111268
GFP	1	Cell 1	x0	0.0188609
GFP	1	Cell 1	x0	0.149544
GFP	1	Cell 1	x0	-0.244189
GFP	1	Cell 1	x0	-0.286517
GFP	1	Cell 1	x0	-0.00292205
GFP	1	Cell 1	x0	0.0229595
GFP	1	Cell 1	x0	0.0484355
GFP	1	Cell 1	x0	-0.0402964
GFP	1	Cell 1	x0	-0.235502
GFP	1	Cell 1	x0	-0.247442
GFP	1	Cell 1	x0	-0.201738
GFP	1	Cell 1	x0	0.0169552
GFP	1	Cell 1	x0	0.0883986
GFP	1	Cell 1	x0	-0.0020116
GFP	1	Cell 1	x0	0.0895346
GFP	1	Cell 1	x0	-0.1128
GFP	1	Cell 1	x0	0.0592446
GFP	1	Cell 1	x0	-0.0634187
GFP	1	Cell 1	x0	0.107104
GFP	1	Cell 1	x0	-0.0890191
GFP	1	Cell 1	x0	-0.192153
GFP	1	Cell 1	x0	0.0278303
GFP	1	Cell 1	x0	0.00991537
GFP	1	Cell 1	x0	-0.0221391
GFP	1	Cell 1	x0	-0.0476835
GFP	1	Cell 1	x0	-0.0480344
GFP	1	Cell 1	x0	-0.0186251
GFP	1	Cell 1	x0	0.354
GFP	1	Cell 1	x0	0.0933763
GFP	1	Cell 1	x0	0.0615895
GFP	1	Cell 1	x0	0.00735952
GFP	1	Cell 1	x0	-0.00263951
GFP	1	Cell 1	x0	0.0179089
GFP	1	Cell 1	x0	0.185378
GFP	1	Cell 1	x0	-0.0909387
GFP	1	Cell 1	x0	0.141736
GFP	1	Cell 1	x0	-0.164146
GFP	1	Cell 1	x0	-0.237914
GFP	1	Cell 1	x0	-0.193808
GFP	1	Cell 1	x0	-0.115862
GFP	1	Cell 1	x0	-0.0461175
GFP	1	Cell 1	x0	0.0368662
GFP	1	Cell 1	x0	0.111811
GFP	1	Cell 1	x0	0.101279
GFP	1	Cell 1	x0	-0.0098881
GFP	1	Cell 1	x0	0.0728164
GFP	1	Cell 1	x0	0.0667008
GFP	1	Cell 1	x0	-0.0213566
GFP	1	Cell 1	x0	-0.128713
GFP	1	Cell 1	x0	-0.218258
GFP	1	Cell 1	x0	0.160341
GFP	1	Cell 1	x0	-0.0808547
GFP	1	Cell 1	x0	-0.00216907
GFP	1	Cell 1	x0	-0.00266101
GFP	1	Cell 1	x0	0.104406
GFP	1	Cell 1	x0	0.127648
GFP	1	Cell 1	x0	0.213193
GFP	1	Cell 1	x0	0.0503606
GFP	1	Cell 1	x0	0.0854852
GFP	1	Cell 1	x0	0.0339813
GFP	1	Cell 1	x0	0.122705
GFP	1	Cell 1	x0	0.038101
GFP	1	Cell 1	x0	0.151293
GFP	1	Cell 1	x0	0.531218
GFP	1	Cell 1	x0	0.12526
GFP	1	Cell 1	x0	0.0881636
GFP	1	Cell 1	x0	0.0578387
GFP	1	Cell 1	x0	0.157747
GFP	1	Cell 1	x0	0.16513
GFP	1	Cell 1	x0	0.230678
GFP	1	Cell 1	x0	0.204035
GFP	1	Cell 1	x0	0.0246704
GFP	1	Cell 1	x0	0.136249
GFP	1	Cell 1	x0	-0.0129596
GFP	1	Cell 1	x0	0.11665
GFP	1	Cell 1	x0	-0.44744
GFP	1	Cell 1	x0	-0.06055
GFP	1	Cell 1	x0	-0.138326
GFP	1	Cell 1	x0	-0.265664
GFP	1	Cell 1	x0	0.00203732
GFP	1	Cell 1	x0	-0.0174684
GFP	1	Cell 1	x0	-0.149249
GFP	1	Cell 1	x0	0.0213955
GFP	1	Cell 1	x0	-0.213974
GFP	1	Cell 1	x0	-0.0687208
GFP	1	Cell 1	x0	-0.0243809
GFP	1	Cell 1	x0	0.28417
GFP	1	Cell 1	x0	0.195778
GFP	1	Cell 1	x0	-0.0316718
GFP	1	Cell 1	x0	0.0757097
GFP	1	Cell 1	x0	0.0135648
GFP	1	Cell 1	x0	0.154788
GFP	1	Cell 1	x0	0.120496
GFP	1	Cell 1	x0	0.0291005
GFP	1	Cell 1	x0	-0.237285
GFP	1	Cell 1	x0	-0.434085
GFP	1	Cell 1	x0	-0.550392
GFP	1	Cell 1	x0	-0.346538
GFP	1	Cell 1	x0	-0.525223
GFP	1	Cell 1	x0	-0.457662
GFP	1	Cell 1	x0	-0.470425
GFP	1	Cell 1	x0	-0.468764
GFP	1	Cell 1	x0	0.0208385
GFP	1	Cell 1	x0	-0.00563397
GFP	1	Cell 1	x0	0.151725
GFP	1	Cell 1	x0	0.205258
GFP	1	Cell 1	x0	0.0102528
GFP	1	Cell 1	x0	0.235324
GFP	1	Cell 1	x0	0.154616
GFP	1	Cell 1	x0	-0.121645
GFP	1	Cell 1	x0	0.0153174
GFP	1	Cell 1	x0	-0.17517
GFP	1	Cell 1	x0	0.122784
GFP	1	Cell 1	x0	0.0584405
GFP	1	Cell 1	x0	0.057959
GFP	1	Cell 1	x0	0.0172197
GFP	1	Cell 1	x0	0.0262197
GFP	1	Cell 1	x0	0.109652
GFP	1	Cell 1	x0	-0.0436887
GFP	1	Cell 1	x0	0.151813
GFP	1	Cell 1	x0	0.165017
GFP	1	Cell 1	x0	0.0140585
GFP	1	Cell 1	x0	0.00090979
GFP	1	Cell 1	x0	0.0380708
GFP	1	Cell 1	x0	-0.601405
GFP	1	Cell 1	x0	0.0538373
GFP	1	Cell 1	x0	0.0662716
GFP	1	Cell 1	x0	0.375027
GFP	1	Cell 1	x0	-0.0410662
GFP	1	Cell 1	x0	0.0598348
GFP	1	Cell 1	x0	0.104278
GFP	1	Cell 1	x0	0.00184584
GFP	1	Cell 1	x0	0.133914
GFP	1	Cell 1	x0	0.353773
GFP	1	Cell 1	x0	0.22319
GFP	1	Cell 1	x0	0.1109
GFP	1	Cell 1	x0	0.0915273
GFP	1	Cell 1	x0	0.101612
GFP	1	Cell 1	x0	0.021967
GFP	1	Cell 1	x0	-0.00195638
GFP	1	Cell 1	x0	0.128557
GFP	1	Cell 1	x0	0.00150172
GFP	1	Cell 1	x0	0.00905712
GFP	1	Cell 1	x0	0.107913
GFP	1	Cell 1	x0	0.0616062
GFP	1	Cell 1	x0	0.0408317
GFP	1	Cell 1	x0	0.00473312
GFP	1	Cell 1	x0	0.00588923
GFP	1	Cell 1	x0	-0.0316184
GFP	1	Cell 1	x0	-0.00454457
GFP	1	Cell 1	x0	0.0686706
GFP	1	Cell 1	x0	0.0302004
GFP	1	Cell 1	x0	0.0876866
GFP	1	Cell 1	x0	-0.00302508
GFP	1	Cell 1	x0	0.410173
GFP	1	Cell 1	x0	0.192015
GFP	1	Cell 1	x0	0.058699
GFP	1	Cell 1	x0	0.0860039
GFP	1	Cell 1	x0	0.0341234
GFP	1	Cell 1	x0	0.201954
GFP	1	Cell 1	x0	-0.0385228
GFP	1	Cell 1	x0	-0.104519
GFP	1	Cell 1	x0	-0.691354
GFP	1	Cell 1	x0	0.0445513
GFP	1	Cell 1	x0	-0.0616677
GFP	1	Cell 1	x0	-0.0752311
GFP	1	Cell 1	x0	0.0211175
GFP	1	Cell 1	x0	0.324338
GFP	1	Cell 1	x0	0.0409437
GFP	1	Cell 1	x0	0.269901
GFP	1	Cell 1	x0	0.111925
GFP	1	Cell 1	x0	0.110351
GFP	1	Cell 1	x0	0.149574
GFP	1	Cell 1	x0	0.0595234
GFP	1	Cell 1	x0	0.0809279
GFP	1	Cell 1	x0	0.0609712
GFP	1	Cell 1	x0	0.241701
GFP	1	Cell 1	x0	-0.0113031
GFP	1	Cell 1	x0	-0.102275
GFP	1	Cell 1	x0	-0.269422
GFP	1	Cell 1	x0	-0.0468743
GFP	1	Cell 1	x0	0.0284763
GFP	1	Cell 1	x0	0.0585397
GFP	1	Cell 1	x0	0.0613322
GFP	1	Cell 1	x0	0.128353
GFP	1	Cell 1	x0	0.00394688
GFP	1	Cell 1	x0	-0.424407
GFP	1	Cell 1	x0	-0.101501
GFP	1	Cell 1	x0	0.26228
GFP	1	Cell 1	x0	0.0154364
GFP	1	Cell 1	x0	-0.0834553
GFP	1	Cell 1	x0	0.00980473
GFP	1	Cell 1	x0	0.118571
GFP	1	Cell 1	x0	0.0522451
GFP	1	Cell 1	x0	0.0731597
GFP	1	Cell 1	x0	0.197506
GFP	1	Cell 1	x0	-0.0322841
GFP	1	Cell 1	x0	0.0478802
GFP	1	Cell 1	x0	0.151973
GFP	1	Cell 1	x0	-0.0144032
GFP	1	Cell 1	x0	0.116055
GFP	1	Cell 1	x0	0.00510181
GFP	1	Cell 1	x0	0.0855625
GFP	1	Cell 1	x0	0.0256318
GFP	1	Cell 1	x0	0.0567855
GFP	1	Cell 1	x0	0.0279252
GFP	1	Cell 1	x0	0.150307
GFP	1	Cell 1	x0	-0.00627982
GFP	1	Cell 1	x0	0.0309356
GFP	1	Cell 1	x0	-0.0390952
GFP	1	Cell 1	x0	-0.0529286
GFP	1	Cell 1	x0	0.11732
GFP	1	Cell 1	x0	-0.122229
GFP	1	Cell 1	x0	0.263091
GFP	1	Cell 1	x0	0.0248594
GFP	1	Cell 1	x0	0.0183012
GFP	1	Cell 1	x0	0.00268176
GFP	1	Cell 1	x0	-0.179967
GFP	1	Cell 1	x0	0.0162194
GFP	1	Cell 1	x0	-0.137371
GFP	1	Cell 1	x0	0.0819982
GFP	1	Cell 1	x0	-0.0511861
GFP	1	Cell 1	x0	-0.0697947
GFP	1	Cell 1	x0	-0.0613591
GFP	1	Cell 1	x0	0.140625
GFP	1	Cell 1	x0	-0.0388718
GFP	1	Cell 1	x0	0.0116763
GFP	1	Cell 1	x0	-0.0644781
GFP	1	Cell 1	x0	-0.378953
GFP	1	Cell 1	x0	-0.310661
GFP	1	Cell 1	x0	0.0234127
GFP	1	Cell 1	x0	0.353639
GFP	1	Cell 1	x0	-0.0935887
GFP	1	Cell 1	x0	-0.174229
GFP	1	Cell 1	x0	-0.0702565
GFP	1	Cell 1	x0	-0.151791
GFP	1	Cell 1	x0	0.108233
GFP	1	Cell 1	x0	0.00334328
GFP	1	Cell 1	x0	0.00143535
GFP	1	Cell 1	x0	0.444101
GFP	1	Cell 1	x0	0.320274
GFP	1	Cell 1	x0	0.129336
GFP	1	Cell 1	x0	0.00178415
GFP	1	Cell 1	x0	-0.0205103
GFP	1	Cell 1	x0	0.0276134
GFP	1	Cell 1	x0	-0.00305336
GFP	1	Cell 1	x0	-0.0800348
GFP	1	Cell 1	x0	0.0603399
GFP	1	Cell 1	x0	-0.154736
GFP	1	Cell 1	x0	-0.10654
GFP	1	Cell 1	x0	-0.0917484
GFP	1	Cell 1	x0	0.00551125
GFP	1	Cell 1	x0	-0.0833402
GFP	1	Cell 1	x0	-0.279054
GFP	1	Cell 1	x0	-0.258895
GFP	1	Cell 1	x0	-0.448739
GFP	1	Cell 1	x0	0.0512386
GFP	1	Cell 1	x0	0.239397
GFP	1	Cell 1	x0	0.00827921
GFP	1	Cell 1	x0	-0.295928
GFP	1	Cell 1	x0	-0.22757
GFP	1	Cell 1	x0	-0.00159762
GFP	1	Cell 1	x0	-0.174469
GFP	1	Cell 1	x0	-0.165779
GFP	1	Cell 1	x0	-0.259416
GFP	1	Cell 1	x0	0.0532708
GFP	1	Cell 1	x0	-0.162386
GFP	1	Cell 1	x0	-0.367983
GFP	1	Cell 1	x0	-0.406353
GFP	1	Cell 1	x0	-0.563761
GFP	1	Cell 1	x0	-0.571276
GFP	1	Cell 1	x0	0.173749
GFP	1	Cell 1	x0	-0.0763387
GFP	1	Cell 1	x0	0.125668
GFP	1	Cell 1	x0	-0.035263
GFP	1	Cell 1	x0	-0.0447826
GFP	1	Cell 1	x0	-0.00792252
GFP	1	Cell 1	x0	0.0326302
GFP	1	Cell 1	x0	-0.0350864
GFP	1	Cell 1	x0	0.0766658
GFP	1	Cell 1	x0	-0.10471
GFP	1	Cell 1	x0	-0.298418
GFP	1	Cell 1	x0	-0.186306
GFP	1	Cell 1	x0	-0.0553813
GFP	1	Cell 1	x0	0.050471
GFP	1	Cell 1	x0	0.231819
GFP	1	Cell 1	x0	-0.271005
GFP	1	Cell 1	x0	-0.628416
GFP	1	Cell 1	x0	0.349159
GFP	1	Cell 1	x0	0.0308306
GFP	1	Cell 1	x0	0.052379
GFP	1	Cell 1	x0	0.135672
GFP	1	Cell 1	x0	0.036804
GFP	1	Cell 1	x0	0.00152452
GFP	1	Cell 1	x0	0.188001
GFP	1	Cell 1	x0	-0.0850746
GFP	1	Cell 1	x0	0.239377
GFP	1	Cell 1	x0	-0.193124
GFP	1	Cell 1	x0	-0.112269
GFP	1	Cell 1	x0	-0.363755
GFP	1	Cell 1	x0	0.0338606
GFP	1	Cell 1	x0	-0.132798
GFP	1	Cell 1	x0	0.0111069
GFP	1	Cell 1	x0	0.00463546
GFP	1	Cell 1	x0	0.15051
GFP	1	Cell 1	x0	-0.0743352
GFP	1	Cell 1	x0	-0.382184
GFP	1	Cell 1	x0	-0.182066
GFP	1	Cell 1	x0	-0.357668
GFP	1	Cell 1	x0	-0.0599228
GFP	1	Cell 1	x0	0.0588151
GFP	1	Cell 1	x0	-0.0698842
GFP	1	Cell 1	x0	-0.328853
GFP	1	Cell 1	x0	-0.278267
GFP	1	Cell 1	x0	0.0212977
GFP	1	Cell 1	x0	0.12122
GFP	1	Cell 1	x0	0.00793741
GFP	1	Cell 1	x0	0.00362156
GFP	1	Cell 1	x0	0.132171
GFP	1	Cell 1	x0	0.191681
GFP	1	Cell 1	x0	-0.00664542
GFP	1	Cell 1	x0	0.229642
GFP	1	Cell 1	x0	-0.157171
GFP	1	Cell 1	x0	-0.2176
GFP	1	Cell 1	x0	0.00437815
GFP	1	Cell 1	x0	0.0079864
GFP	1	Cell 1	x0	0.0655439
GFP	1	Cell 1	x0	0.183558
GFP	1	Cell 1	x0	0.0563189
GFP	1	Cell 1	x0	-0.0626808
GFP	1	Cell 1	x0	-0.220028
GFP	1	Cell 1	x0	-0.43231
GFP	1	Cell 1	x0	0.0960935
GFP	1	Cell 1	x0	0.112345
GFP	1	Cell 1	x0	0.165088
GFP	1	Cell 1	x0	0.0378779
GFP	1	Cell 1	x0	-0.0628761
GFP	1	Cell 1	x0	0.00321081
GFP	1	Cell 1	x0	0.195225
GFP	1	Cell 1	x0	0.0680105
GFP	1	Cell 1	x0	0.0977555
GFP	1	Cell 1	x0	0.221537
GFP	1	Cell 1	x0	0.150318
GFP	1	Cell 1	x0	0.160703
GFP	1	Cell 1	x0	-0.173266
GFP	1	Cell 1	x0	-0.385576
GFP	1	Cell 1	x0	-0.238932
GFP	1	Cell 1	x0	0.0152684
GFP	1	Cell 1	x0	0.404721
GFP	1	Cell 1	x0	0.0240576
GFP	1	Cell 1	x0	-0.432202
GFP	1	Cell 1	x0	0.00789731
GFP	1	Cell 1	x0	-0.0976443
GFP	1	Cell 1	x0	0.222771
GFP	1	Cell 1	x0	0.200239
GFP	1	Cell 1	x0	-0.0165356
GFP	1	Cell 1	x0	-0.0380643
GFP	1	Cell 1	x0	-0.0217361
GFP	1	Cell 1	x0	0.0541121
GFP	1	Cell 1	x0	0.215362
GFP	1	Cell 1	x0	0.264071
GFP	1	Cell 1	x0	0.292931
GFP	1	Cell 1	x0	0.00772709
GFP	1	Cell 1	x0	-0.0446706
GFP	1	Cell 1	x0	0.208572
GFP	1	Cell 1	x0	0.111442
GFP	1	Cell 1	x0	0.21552
GFP	1	Cell 1	x0	0.00725431
GFP	1	Cell 1	x0	0.065051
GFP	1	Cell 1	x0	-0.0879045
GFP	1	Cell 1	x0	-0.101321
GFP	1	Cell 1	x0	-0.166245
GFP	1	Cell 1	x0	-0.0809322
GFP	1	Cell 1	x0	-0.0553696
GFP	1	Cell 1	x0	-0.104704
GFP	1	Cell 1	x0	0.119724
GFP	1	Cell 1	x0	-0.0170028
GFP	1	Cell 1	x0	0.102041
GFP	1	Cell 1	x0	-0.244241
GFP	1	Cell 1	x0	0.0542596
GFP	1	Cell 1	x0	0.0821408
GFP	1	Cell 1	x0	0.0467549
GFP	1	Cell 1	x0	0.255667
GFP	1	Cell 1	x0	0.0396187
GFP	1	Cell 1	x0	0.0640817
GFP	1	Cell 1	x0	0.0646218
GFP	1	Cell 1	x0	-0.0554228
GFP	1	Cell 1	x0	-0.0942151
GFP	1	Cell 1	x0	-0.0416602
GFP	1	Cell 1	x0	0.0835345
GFP	1	Cell 1	x0	0.056201
GFP	1	Cell 1	x0	-0.0372524
GFP	1	Cell 1	x0	-0.235927
GFP	1	Cell 1	x0	0.00874259
GFP	1	Cell 1	x0	0.0184158
GFP	1	Cell 1	x0	0.123961
GFP	1	Cell 1	x0	-0.243506
GFP	1	Cell 1	x0	0.00983601
GFP	1	Cell 1	x0	0.00695371
GFP	1	Cell 1	x0	0.0823687
GFP	1	Cell 1	x0	0.00655605
GFP	1	Cell 1	x0	-0.0139228
GFP	1	Cell 1	x0	0.0150843
GFP	1	Cell 1	x0	0.170785
GFP	1	Cell 1	x0	0.0139338
GFP	1	Cell 1	x0	0.0559208
GFP	1	Cell 1	x0	-0.0279543
GFP	1	Cell 1	x0	-0.159148
GFP	1	Cell 1	x0	-0.0864311
GFP	1	Cell 1	x0	-0.00536105
GFP	1	Cell 1	x0	0.0520954
GFP	1	Cell 1	x0	0.00564319
GFP	1	Cell 1	x0	0.141647
GFP	1	Cell 1	x0	0.0252105
GFP	1	Cell 1	x0	0.033789
GFP	1	Cell 1	x0	0.103933
GFP	1	Cell 1	x0	0.058769
GFP	1	Cell 1	x0	0.261774
GFP	1	Cell 1	x0	0.446768
GFP	1	Cell 1	x0	-0.0500219
GFP	1	Cell 1	x0	-0.192031
GFP	1	Cell 1	x0	0.0245448
GFP	1	Cell 1	x0	0.0104061
GFP	1	Cell 1	x0	0.0217143
GFP	1	Cell 1	x0	-0.030139
GFP	1	Cell 1	x0	0.0592294
GFP	1	Cell 1	x0	-0.0709891
GFP	1	Cell 1	x0	0.142647
GFP	1	Cell 1	x0	0.342232
GFP	1	Cell 1	x0	0.0537749
GFP	1	Cell 1	x0	0.00474058
GFP	1	Cell 1	x0	-0.0191479
GFP	1	Cell 1	x0	-0.0415341
GFP	1	Cell 1	x0	-0.0145806
GFP	1	Cell 1	x0	-0.169724
GFP	1	Cell 1	x0	-0.0015316
GFP	1	Cell 1	x0	-0.0244225
GFP	1	Cell 1	x0	-0.000785763
GFP	1	Cell 1	x0	-0.200738
GFP	1	Cell 1	x0	-0.0399594
GFP	1	Cell 1	x0	0.465281
GFP	1	Cell 1	x0	0.19603
GFP	1	Cell 1	x0	0.0544498
GFP	1	Cell 1	x0	-0.0298784
GFP	1	Cell 1	x0	-0.00597295
GFP	1	Cell 1	x0	0.206306
GFP	1	Cell 1	x0	0.00341659
GFP	1	Cell 1	x0	0.0437755
GFP	1	Cell 1	x0	0.0299948
GFP	1	Cell 1	x0	0.0783299
GFP	1	Cell 1	x0	0.0591348
GFP	1	Cell 1	x0	0.0302189
GFP	1	Cell 1	x0	0.0157741
GFP	1	Cell 1	x0	0.0681202
GFP	1	Cell 1	x0	0.317915
GFP	1	Cell 1	x0	-0.0646135
GFP	1	Cell 1	x0	-0.154601
GFP	1	Cell 1	x0	-0.0973546
GFP	1	Cell 1	x0	-0.0843069
GFP	1	Cell 1	x0	0.0565142
GFP	1	Cell 1	x0	0.117459
GFP	1	Cell 1	x0	-0.0123099
GFP	1	Cell 1	x0	-0.109323
GFP	1	Cell 1	x0	-0.129134
GFP	1	Cell 1	x0	0.0512567
GFP	1	Cell 1	x0	0.00489814
GFP	1	Cell 1	x0	0.0730437
GFP	1	Cell 1	x0	-0.0104366
GFP	1	Cell 1	x0	0.0266396
GFP	1	Cell 1	x0	-0.0403997
GFP	1	Cell 1	x0	-0.0491074
GFP	1	Cell 1	x0	0.107565
GFP	1	Cell 1	x0	0.138022
GFP	1	Cell 1	x0	0.282292
GFP	1	Cell 1	x0	0.207837
GFP	1	Cell 1	x0	0.0197541
GFP	1	Cell 1	x0	-0.00567269
GFP	1	Cell 1	x0	0.0230814
GFP	1	Cell 1	x0	0.0226463
GFP	1	Cell 1	x0	0.0467447
GFP	1	Cell 1	x0	-0.141433
GFP	1	Cell 1	x0	-0.250597
GFP	1	Cell 1	x0	-0.231722
GFP	1	Cell 1	x0	0.0944287
GFP	1	Cell 1	x0	0.376463
GFP	1	Cell 1	x0	0.0774901
GFP	1	Cell 1	x0	-0.0330778
GFP	1	Cell 1	x0	-0.10382
GFP	1	Cell 1	x0	0.0988074
GFP	1	Cell 1	x0	-0.0862203
GFP	1	Cell 1	x0	0.44122
GFP	1	Cell 1	x0	0.233589
GFP	1	Cell 1	x0	0.240417
GFP	1	Cell 1	x0	0.255469
GFP	1	Cell 1	x0	0.0546989
GFP	1	Cell 1	x0	-0.0850179
GFP	1	Cell 1	x0	0.225363
GFP	1	Cell 1	x0	-0.135669
GFP	1	Cell 1	x0	-0.26421
GFP	1	Cell 1	x0	0.0464537
GFP	1	Cell 1	x0	-0.026385
GFP	1	Cell 1	x0	0.100529
GFP	1	Cell 1	x0	0.0375305
GFP	1	Cell 1	x0	-0.0848881
GFP	1	Cell 1	x0	-0.046191
GFP	1	Cell 1	x0	0.0762855
GFP	1	Cell 1	x0	0.0373853
GFP	1	Cell 1	x0	0.332924
GFP	1	Cell 1	x0	0.0708594
GFP	1	Cell 1	x0	0.064463
GFP	1	Cell 1	x0	0.0134932
GFP	1	Cell 1	x0	0.165026
GFP	1	Cell 1	x0	-0.0747919
GFP	1	Cell 1	x0	-0.0203061
GFP	1	Cell 1	x0	0.108012
GFP	1	Cell 1	x0	0.0519217
GFP	1	Cell 1	x0	-0.0939412
GFP	1	Cell 1	x0	-0.0105222
GFP	1	Cell 1	x0	0.0305186
GFP	1	Cell 1	x0	0.0600995
GFP	1	Cell 1	x0	0.238505
GFP	1	Cell 1	x0	-0.0720282
GFP	1	Cell 1	x0	-0.0385816
GFP	1	Cell 1	x0	0.22952
GFP	1	Cell 1	x0	-0.261027
GFP	1	Cell 1	x0	-0.246496
GFP	1	Cell 1	x0	-0.0533331
GFP	1	Cell 1	x0	0.00447122
GFP	1	Cell 1	x0	0.123108
GFP	1	Cell 1	x0	0.0946052
GFP	1	Cell 1	x0	-0.0319852
GFP	1	Cell 1	x0	0.0768851
GFP	1	Cell 1	x0	0.0896675
GFP	1	Cell 1	x0	0.0092024
GFP	1	Cell 1	x0	0.00153939
GFP	1	Cell 1	x0	0.0701703
GFP	1	Cell 1	x0	0.0475444
GFP	1	Cell 1	x0	0.0291082
GFP	1	Cell 1	x0	0.0433211
GFP	1	Cell 1	x0	0.212843
GFP	1	Cell 1	x0	-0.0537456
GFP	1	Cell 1	x0	0.0609784
GFP	1	Cell 1	x0	0.0309333
GFP	1	Cell 1	x0	-0.0468689
GFP	1	Cell 1	x0	0.0436062
GFP	1	Cell 1	x0	0.00395415
GFP	1	Cell 1	x0	-0.0488838
GFP	1	Cell 1	x0	0.268396
GFP	1	Cell 1	x0	0.0174583
GFP	1	Cell 1	x0	-0.0401035
GFP	1	Cell 1	x0	0.000451902
GFP	1	Cell 1	x0	0.00423098
GFP	1	Cell 1	x0	-0.165387
GFP	1	Cell 1	x0	-0.417125
GFP	1	Cell 1	x0	-0.226731
GFP	1	Cell 1	x0	-0.260908
GFP	1	Cell 1	x0	0.0371395
GFP	1	Cell 1	x0	0.161137
GFP	1	Cell 1	x0	0.0665401
GFP	1	Cell 1	x0	0.00642656
GFP	1	Cell 1	x0	0.013032
GFP	1	Cell 1	x0	0.0310913
GFP	1	Cell 1	x0	0.0142662
GFP	1	Cell 1	x0	0.158661
GFP	1	Cell 1	x0	0.141957
GFP	1	Cell 1	x0	0.0531196
GFP	1	Cell 1	x0	-0.155623
GFP	1	Cell 1	x0	0.0174687
GFP	1	Cell 1	x0	-0.0612569
GFP	1	Cell 1	x0	-0.108902
GFP	1	Cell 1	x0	-0.203297
GFP	1	Cell 1	x0	-0.164584
GFP	1	Cell 1	x0	0.0655652
GFP	1	Cell 1	x0	-0.045037
GFP	1	Cell 1	x0	0.306023
GFP	1	Cell 1	x0	0.0379136
GFP	1	Cell 1	x0	-0.0139408
GFP	1	Cell 1	x0	-0.00161335
GFP	1	Cell 1	x0	0.0359478
GFP	1	Cell 1	x0	0.0413385
GFP	1	Cell 1	x0	0.106863
GFP	1	Cell 1	x0	-0.00147552
GFP	1	Cell 1	x0	0.0644952
GFP	1	Cell 1	x0	-0.0774919
GFP	1	Cell 1	x0	-0.1645
GFP	1	Cell 1	x0	0.141596
GFP	1	Cell 1	x0	0.141654
GFP	1	Cell 1	x0	0.180183
GFP	1	Cell 1	x0	0.0950848
GFP	1	Cell 1	x0	-0.000320631
GFP	1	Cell 1	x0	0.0361128
GFP	1	Cell 1	x0	0.0740227
GFP	1	Cell 1	x0	0.143715
GFP	1	Cell 1	x0	0.0565484
GFP	1	Cell 1	x0	0.0341256
GFP	1	Cell 1	x0	0.0640659
GFP	1	Cell 1	x0	0.0421325
GFP	1	Cell 1	x0	0.0047433
GFP	1	Cell 1	x0	-0.23666
GFP	1	Cell 1	x0	0.0825298
GFP	1	Cell 1	x0	-0.0163976
GFP	1	Cell 1	x0	0.167489
GFP	1	Cell 1	x0	-0.0384294
GFP	1	Cell 1	x0	0.000585233
GFP	1	Cell 1	x0	-0.380475
GFP	1	Cell 1	x0	-0.502467
GFP	1	Cell 1	x0	0.184283
GFP	1	Cell 1	x0	-0.0150318
GFP	1	Cell 1	x0	-0.342458
GFP	1	Cell 1	x0	-0.361759
GFP	1	Cell 1	x0	-0.0501604
GFP	1	Cell 1	x0	-0.0951812
GFP	1	Cell 1	x0	0.0723598
GFP	1	Cell 1	x0	-0.138364
GFP	1	Cell 1	x0	-0.205869
GFP	1	Cell 1	x0	-0.0174858
GFP	1	Cell 1	x0	-0.082663
GFP	1	Cell 1	x0	0.074578
GFP	1	Cell 1	x0	0.0144452
GFP	1	Cell 1	x0	-0.0602821
GFP	1	Cell 1	x0	-0.0626794
GFP	1	Cell 1	x0	0.0415671
GFP	1	Cell 1	x0	-0.0345556
GFP	1	Cell 1	x0	-0.00581979
GFP	1	Cell 1	x0	0.346999
GFP	1	Cell 1	x0	0.0447837
GFP	1	Cell 1	x0	0.154523
GFP	1	Cell 1	x0	0.189332
GFP	1	Cell 1	x0	-0.0339891
GFP	1	Cell 1	x0	0.00396498
GFP	1	Cell 1	x0	-0.0409544
GFP	1	Cell 1	x0	0.12315
GFP	1	Cell 1	x0	0.269476
GFP	1	Cell 1	x0	0.120838
GFP	1	Cell 1	x0	0.320216
GFP	1	Cell 1	x0	-0.0539944
GFP	1	Cell 1	x0	-0.219364
GFP	1	Cell 1	x0	-0.176705
GFP	1	Cell 1	x0	-0.00261345
GFP	1	Cell 1	x0	-0.267613
GFP	1	Cell 1	x0	-0.121803
GFP	1	Cell 1	x0	0.0156525
GFP	1	Cell 1	x0	-0.117663
GFP	1	Cell 1	x0	-0.0963247
GFP	1	Cell 1	x0	-0.0675795
GFP	1	Cell 1	x0	0.0478947
GFP	1	Cell 1	x0	0.448585
GFP	1	Cell 1	x0	0.0449806
GFP	1	Cell 1	x0	0.0989915
GFP	1	Cell 1	x0	0.00455126
GFP	1	Cell 1	x0	0.0810654
GFP	1	Cell 1	x0	0.111409
GFP	1	Cell 1	x0	0.219638
GFP	1	Cell 1	x0	0.048193
GFP	1	Cell 1	x0	-0.0693557
GFP	1	Cell 1	x0	0.177857
GFP	1	Cell 1	x0	0.17123
GFP	1	Cell 1	x0	0.221655
GFP	1	Cell 1	x0	0.0505575
GFP	1	Cell 1	x0	0.0423429
GFP	1	Cell 1	x0	0.0773129
GFP	1	Cell 1	x0	-0.058798
GFP	1	Cell 1	x0	0.0240422
GFP	1	Cell 1	x0	0.00180784
GFP	1	Cell 1	x0	0.0252646
GFP	1	Cell 1	x0	-0.184134
GFP	1	Cell 1	x0	-0.101824
GFP	1	Cell 1	x0	0.0158462
GFP	1	Cell 1	x0	-0.0426626
GFP	1	Cell 1	x0	-0.093046
GFP	1	Cell 1	x0	0.0191409
GFP	1	Cell 1	x0	0.0397563
GFP	1	Cell 1	x0	-0.0637013
GFP	1	Cell 1	x0	-0.110564
GFP	1	Cell 1	x0	-0.0363483
GFP	1	Cell 1	x0	-0.031327
GFP	1	Cell 1	x0	-0.147245
GFP	1	Cell 1	x0	0.0395576
GFP	1	Cell 1	x0	-0.243497
GFP	1	Cell 1	x0	0.0114085
GFP	1	Cell 1	x0	0.0723195
GFP	1	Cell 1	x0	0.184194
GFP	1	Cell 1	x0	0.0295441
GFP	1	Cell 1	x0	-0.0449932
GFP	1	Cell 1	x0	-0.0404406
GFP	1	Cell 1	x0	-0.00197322
GFP	1	Cell 1	x0	-0.0476684
GFP	1	Cell 1	x0	0.0927635
GFP	1	Cell 1	x0	-0.0320838
GFP	1	Cell 1	x0	-0.184079
GFP	1	Cell 1	x0	-0.190582
GFP	1	Cell 1	x0	0.132812
GFP	1	Cell 1	x0	-0.0863663
GFP	1	Cell 1	x0	0.00865528
GFP	1	Cell 1	x0	-0.0335076
GFP	1	Cell 1	x0	-0.00258163
GFP	1	Cell 1	x0	0.0189828
GFP	1	Cell 1	x0	0.145277
GFP	1	Cell 1	x0	0.0745306
GFP	1	Cell 1	x0	0.108122
GFP	1	Cell 1	x0	0.0319114
GFP	1	Cell 1	x0	0.0601523
GFP	1	Cell 1	x0	0.02919
GFP	1	Cell 1	x0	-0.317601
GFP	1	Cell 1	x0	-0.0918359
GFP	1	Cell 1	x0	0.0340145
GFP	1	Cell 1	x0	0.258025
GFP	1	Cell 1	x0	0.1401
GFP	1	Cell 1	x0	-0.197598
GFP	1	Cell 1	x0	-0.329637
GFP	1	Cell 1	x0	0.165623
GFP	1	Cell 1	x0	-0.0427997
GFP	1	Cell 1	x0	-0.151465
GFP	1	Cell 1	x0	0.027479
GFP	1	Cell 1	x0	0.00239971
GFP	1	Cell 1	x0	0.301199
GFP	1	Cell 1	x0	0.0178416
GFP	1	Cell 1	x0	-0.0291954
GFP	1	Cell 1	x0	0.000398924
GFP	1	Cell 1	x0	-0.231378
GFP	1	Cell 1	x0	-0.0156836
GFP	1	Cell 1	x0	0.0102016
GFP	1	Cell 1	x0	0.390646
GFP	1	Cell 1	x0	0.0329014
GFP	1	Cell 1	x0	0.0269188
GFP	1	Cell 1	x0	0.277712
GFP	1	Cell 1	x0	-0.0820161
GFP	1	Cell 1	x0	-0.0627696
GFP	1	Cell 1	x0	0.125917
GFP	1	Cell 1	x0	0.0262056
GFP	1	Cell 1	x0	0.0152004
GFP	1	Cell 1	x0	0.0236102
GFP	1	Cell 1	x0	-0.0916953
GFP	1	Cell 1	x0	-0.101042
GFP	1	Cell 1	x0	0.284385
GFP	1	Cell 1	x0	0.00860551
GFP	1	Cell 1	x0	0.0380847
GFP	1	Cell 1	x0	-0.105909
GFP	1	Cell 1	x0	-0.235877
GFP	1	Cell 1	x0	-0.0204398
GFP	1	Cell 1	x0	-0.135611
GFP	1	Cell 1	x0	0.0343815
GFP	1	Cell 1	x0	0.389767
GFP	1	Cell 1	x0	-0.01469
GFP	1	Cell 1	x0	0.183088
GFP	1	Cell 1	x0	-0.0223014
GFP	1	Cell 1	x0	0.0784419
GFP	1	Cell 1	x0	0.105259
GFP	1	Cell 1	x0	0.0607013
GFP	1	Cell 1	x0	-0.154563
GFP	1	Cell 1	x0	-0.254118
GFP	1	Cell 1	x0	-0.381164
GFP	1	Cell 1	x0	-0.397141
GFP	1	Cell 1	x0	-0.287758
GFP	1	Cell 1	x0	-0.125884
GFP	1	Cell 1	x0	-0.447905
GFP	1	Cell 1	x0	-0.43912
GFP	1	Cell 1	x0	0.208845
GFP	1	Cell 1	x0	0.0491162
GFP	1	Cell 1	x0	0.0232048
GFP	1	Cell 1	x0	-0.103147
GFP	1	Cell 1	x0	0.218983
GFP	1	Cell 1	x0	0.0174646
GFP	1	Cell 1	x0	-0.0269168
GFP	1	Cell 1	x0	-0.0889502
GFP	1	Cell 1	x0	-0.103937
GFP	1	Cell 1	x0	-0.0856784
GFP	1	Cell 1	x0	0.0652116
GFP	1	Cell 1	x0	-0.0362209
GFP	1	Cell 1	x0	-0.0117823
GFP	1	Cell 1	x0	0.205134
GFP	1	Cell 1	x0	-0.128612
GFP	1	Cell 1	x0	0.143167
GFP	1	Cell 1	x0	0.0724676
GFP	1	Cell 1	x0	0.200907
GFP	1	Cell 1	x0	0.00524314
GFP	1	Cell 1	x0	-0.0335478
GFP	1	Cell 1	x0	0.0844152
GFP	1	Cell 1	x0	0.0587235
GFP	1	Cell 1	x0	0.060277
GFP	1	Cell 1	x0	-0.0354174
GFP	1	Cell 1	x0	-0.148736
GFP	1	Cell 1	x0	0.0162731
GFP	1	Cell 1	x0	0.0946821
GFP	1	Cell 1	x0	0.0830462
GFP	1	Cell 1	x0	0.000362942
GFP	1	Cell 1	x0	0.0136686
GFP	1	Cell 1	x0	0.249164
GFP	1	Cell 1	x0	0.259483
GFP	1	Cell 1	x0	-0.133576
GFP	1	Cell 1	x0	0.0211824
GFP	1	Cell 1	x0	0.00242758
GFP	1	Cell 1	x0	0.186919
GFP	1	Cell 1	x0	0.0125809
GFP	1	Cell 1	x0	0.000791206
GFP	1	Cell 1	x0	-0.0322623
GFP	1	Cell 1	x0	0.152523
GFP	1	Cell 1	x0	0.00105666
GFP	1	Cell 1	x0	-0.332278
GFP	1	Cell 1	x0	0.00115321
GFP	1	Cell 1	x0	0.0281917
GFP	1	Cell 1	x0	0.0294029
GFP	1	Cell 1	x0	-0.071243
GFP	1	Cell 1	x0	0.0819486
GFP	1	Cell 1	x0	-0.140369
GFP	1	Cell 1	x0	-0.0443476
GFP	1	Cell 1	x0	-0.36506
GFP	1	Cell 1	x0	0.072236
GFP	1	Cell 1	x0	-0.0908037
GFP	1	Cell 1	x0	0.0208274
GFP	1	Cell 1	x0	-0.558914
GFP	1	Cell 1	x0	-0.808364
GFP	1	Cell 1	x0	-0.808641
GFP	1	Cell 1	x0	0.00233424
GFP	1	Cell 1	x0	0.0836426
GFP	1	Cell 1	x0	0.0239486
GFP	1	Cell 1	x0	0.0458058
GFP	1	Cell 1	x0	-0.11689
GFP	1	Cell 1	x0	-0.181772
GFP	1	Cell 1	x0	0.0680741
GFP	1	Cell 1	x0	0.158183
GFP	1	Cell 1	x0	0.198511
GFP	1	Cell 1	x0	0.151191
GFP	1	Cell 1	x0	0.153366
GFP	1	Cell 1	x0	0.0142058
GFP	1	Cell 1	x0	0.0567572
GFP	1	Cell 1	x0	0.0464709
GFP	1	Cell 1	x0	0.197827
GFP	1	Cell 1	x0	-0.0323848
GFP	1	Cell 1	x0	0.117178
GFP	1	Cell 1	x0	0.104277
GFP	1	Cell 1	x0	-0.0204328
GFP	1	Cell 1	x0	0.141868
GFP	1	Cell 1	x0	0.10443
GFP	1	Cell 1	x0	-0.406718
GFP	1	Cell 1	x0	-0.090247
GFP	1	Cell 1	x0	0.0732974
GFP	1	Cell 1	x0	-0.103589
GFP	1	Cell 1	x0	0.008795
GFP	1	Cell 1	x0	0.0352361
GFP	1	Cell 1	x0	0.281901
GFP	1	Cell 1	x0	0.210026
GFP	1	Cell 1	x0	0.115777
GFP	1	Cell 1	x0	0.260253
GFP	1	Cell 1	x0	0.166137
GFP	1	Cell 1	x0	0.0380365
GFP	1	Cell 1	x0	-0.0291508
GFP	1	Cell 1	x0	-0.172086
GFP	1	Cell 1	x0	-0.509018
GFP	1	Cell 1	x0	-0.204657
GFP	1	Cell 1	x0	0.0141695
GFP	1	Cell 1	x0	-0.274056
GFP	1	Cell 1	x0	0.00180759
GFP	1	Cell 1	x0	0.0483479
GFP	1	Cell 1	x0	0.0389173
GFP	1	Cell 1	x0	-0.0347318
GFP	1	Cell 1	x0	-0.0312584
GFP	1	Cell 1	x0	0.0252698
GFP	1	Cell 1	x0	0.0438049
GFP	1	Cell 1	x0	-0.0450919
GFP	1	Cell 1	x0	-0.0148519
GFP	1	Cell 1	x0	-0.141182
GFP	1	Cell 1	x0	-0.209411
GFP	1	Cell 1	x0	-0.0849725
GFP	1	Cell 1	x0	-0.119167
GFP	1	Cell 1	x0	0.242351
GFP	1	Cell 1	x0	-0.131525
GFP	1	Cell 1	x0	-0.0485698
GFP	1	Cell 1	x0	0.0708477
GFP	1	Cell 1	x0	0.128844
GFP	1	Cell 1	x0	-0.641198
GFP	1	Cell 1	x0	-0.0246194
GFP	1	Cell 1	x0	0.0257321
GFP	1	Cell 1	x0	0.012293
GFP	1	Cell 1	x0	0.393319
GFP	1	Cell 1	x0	0.0543648
GFP	1	Cell 1	x0	0.152758
GFP	1	Cell 1	x0	0.017317
GFP	1	Cell 1	x0	0.0280751
GFP	1	Cell 1	x0	-0.0161898
GFP	1	Cell 1	x0	0.000997718
GFP	1	Cell 1	x0	0.0534936
GFP	1	Cell 1	x0	0.0365893
GFP	1	Cell 1	x0	0.131252
GFP	1	Cell 1	x0	0.0535573
GFP	1	Cell 1	x0	0.0938578
GFP	1	Cell 1	x0	0.16703
GFP	1	Cell 1	x0	0.116886
GFP	1	Cell 1	x0	0.0496072
GFP	1	Cell 1	x0	-0.0199815
GFP	1	Cell 1	x0	0.049012
GFP	1	Cell 1	x0	0.00111037
GFP	1	Cell 1	x0	0.337812
GFP	1	Cell 1	x0	0.0236363
GFP	1	Cell 1	x0	0.0156229
GFP	1	Cell 1	x0	0.0122938
GFP	1	Cell 1	x0	0.00654463
GFP	1	Cell 1	x0	0.0514495
GFP	1	Cell 1	x0	-0.094654
GFP	1	Cell 1	x0	-0.508879
GFP	1	Cell 1	x0	0.127094
GFP	1	Cell 1	x0	0.0619332
GFP	1	Cell 1	x0	0.0494128
GFP	1	Cell 1	x0	0.0260697
GFP	1	Cell 1	x0	0.203671
GFP	1	Cell 1	x0	0.058898
GFP	1	Cell 1	x0	-0.123836
GFP	1	Cell 1	x0	-0.230638
GFP	1	Cell 1	x0	-0.10175
GFP	1	Cell 1	x0	0.0832613
GFP	1	Cell 1	x0	0.192482
GFP	1	Cell 1	x0	0.0285686
GFP	1	Cell 1	x0	0.162888
GFP	1	Cell 1	x0	-0.007543
GFP	1	Cell 1	x0	-0.145957
GFP	1	Cell 1	x0	-0.0715027
GFP	1	Cell 1	x0	-0.239739
GFP	1	Cell 1	x0	-0.345287
GFP	1	Cell 1	x0	-0.690353
GFP	1	Cell 1	x0	0.00420731
GFP	1	Cell 1	x0	-0.0234381
GFP	1	Cell 1	x0	0.001189
GFP	1	Cell 1	x0	0.243084
GFP	1	Cell 1	x0	0.243272
GFP	1	Cell 1	x0	-0.0204736
GFP	1	Cell 1	x0	0.112793
GFP	1	Cell 1	x0	-0.192822
GFP	1	Cell 1	x0	0.0801653
GFP	1	Cell 1	x0	-0.164932
GFP	1	Cell 1	x0	-0.424284
GFP	1	Cell 1	x0	-0.612732
GFP	1	Cell 1	x0	-0.428478
GFP	1	Cell 1	x0	0.105919
GFP	1	Cell 1	x0	-0.30709
GFP	1	Cell 1	x0	0.0283126
GFP	1	Cell 1	x0	-0.0233222
GFP	1	Cell 1	x0	-0.0555673
GFP	1	Cell 1	x0	0.0211045
GFP	1	Cell 1	x0	-0.0505461
GFP	1	Cell 1	x0	-0.357585
GFP	1	Cell 1	x0	-0.257827
GFP	1	Cell 1	x0	0.0141542
GFP	1	Cell 1	x0	-0.0332731
GFP	1	Cell 1	x0	0.111697
GFP	1	Cell 1	x0	0.00052134
GFP	1	Cell 1	x0	0.318394
GFP	1	Cell 1	x0	0.145363
GFP	1	Cell 1	x0	0.137335
GFP	1	Cell 1	x0	-0.188013
GFP	1	Cell 1	x0	-0.577872
GFP	1	Cell 1	x0	-0.110478
GFP	1	Cell 1	x0	0.0942831
GFP	1	Cell 1	x0	0.250654
GFP	1	Cell 1	x0	0.119805
GFP	1	Cell 1	x0	0.134021
GFP	1	Cell 1	x0	0.0786071
GFP	1	Cell 1	x0	0.126709
GFP	1	Cell 1	x0	0.371472
GFP	1	Cell 1	x0	0.0612164
GFP	1	Cell 1	x0	0.035604
GFP	1	Cell 1	x0	0.0144653
GFP	1	Cell 1	x0	0.0648617
GFP	1	Cell 1	x0	0.154008
GFP	1	Cell 1	x0	0.0224475
GFP	1	Cell 1	x0	0.0858118
GFP	1	Cell 1	x0	0.0587856
GFP	1	Cell 1	x0	0.139807
GFP	1	Cell 1	x0	0.226452
GFP	1	Cell 1	x0	0.116206
GFP	1	Cell 1	x0	0.0750981
GFP	1	Cell 1	x0	0.0954115
GFP	1	Cell 1	x0	-0.133529
GFP	1	Cell 1	x0	-0.46997
GFP	1	Cell 1	x0	-0.105481
GFP	1	Cell 1	x0	-0.0284662
GFP	1	Cell 1	x0	0.0519238
GFP	1	Cell 1	x0	0.0526627
GFP	1	Cell 1	x0	-0.0339404
GFP	1	Cell 1	x0	-0.00577971
GFP	1	Cell 1	x0	-0.0119241
GFP	1	Cell 1	x0	-0.0741181
GFP	1	Cell 1	x0	0.00459984
GFP	1	Cell 1	x0	-0.329596
GFP	1	Cell 1	x0.05	0.0413948
GFP	1	Cell 1	x0.05	0.0527039
GFP	1	Cell 1	x0.05	0.134131
GFP	1	Cell 1	x0.05	0.0412698
GFP	1	Cell 1	x0.05	0.100649
GFP	1	Cell 1	x0.05	0.0970233
GFP	1	Cell 1	x0.05	0.115315
GFP	1	Cell 1	x0.05	0.102225
GFP	1	Cell 1	x0.05	0.128041
GFP	1	Cell 1	x0.05	0.10702
GFP	1	Cell 1	x0.05	0.0952408
GFP	1	Cell 1	x0.05	0.102449
GFP	1	Cell 1	x0.05	0.0522651
GFP	1	Cell 1	x0.05	0.19444
GFP	1	Cell 1	x0.05	0.0382325
GFP	1	Cell 1	x0.05	0.0691456
GFP	1	Cell 1	x0.05	0.075395
GFP	1	Cell 1	x0.05	0.0618185
GFP	1	Cell 1	x0.05	0.114784
GFP	1	Cell 1	x0.05	0.0912458
GFP	1	Cell 1	x0.05	0.111627
GFP	1	Cell 1	x0.05	0.17683
GFP	1	Cell 1	x0.05	0.195402
GFP	1	Cell 1	x0.05	0.00798428
GFP	1	Cell 1	x0.05	0.0895114
GFP	1	Cell 1	x0.05	0.0525681
GFP	1	Cell 1	x0.05	0.114727
GFP	1	Cell 1	x0.05	0.0890598
GFP	1	Cell 1	x0.05	0.208939
GFP	1	Cell 1	x0.05	0.108213
GFP	1	Cell 1	x0.05	0.0318389
GFP	1	Cell 1	x0.05	0.052023
GFP	1	Cell 1	x0.05	0.124998
GFP	1	Cell 1	x0.05	0.124868
GFP	1	Cell 1	x0.05	0.100697
GFP	1	Cell 1	x0.05	0.115491
GFP	1	Cell 1	x0.05	0.100637
GFP	1	Cell 1	x0.05	0.0878482
GFP	1	Cell 1	x0.05	0.154841
GFP	1	Cell 1	x0.05	0.00526016
GFP	1	Cell 1	x0.05	0.0456785
GFP	1	Cell 1	x0.05	0.215477
GFP	1	Cell 1	x0.05	0.118572
GFP	1	Cell 1	x0.05	0.103791
GFP	1	Cell 1	x0.05	0.132252
GFP	1	Cell 1	x0.05	0.0823822
GFP	1	Cell 1	x0.05	0.000681022
GFP	1	Cell 1	x0.05	0.0275719
GFP	1	Cell 1	x0.05	0.156474
GFP	1	Cell 1	x0.05	0.0356067
GFP	1	Cell 1	x0.05	0.0735869
GFP	1	Cell 1	x0.05	0.0783462
GFP	1	Cell 1	x0.05	0.081629
GFP	1	Cell 1	x0.05	0.0155552
GFP	1	Cell 1	x0.05	0.141926
GFP	1	Cell 1	x0.05	0.136956
GFP	1	Cell 1	x0.05	0.0977317
GFP	1	Cell 1	x0.05	0.028672
GFP	1	Cell 1	x0.05	0.108054
GFP	1	Cell 1	x0.05	0.082319
GFP	1	Cell 1	x0.05	0.115325
GFP	1	Cell 1	x0.05	0.0861051
GFP	1	Cell 1	x0.05	0.0382513
GFP	1	Cell 1	x0.05	0.045012
GFP	1	Cell 1	x0.05	0.0371543
GFP	1	Cell 1	x0.05	0.0488651
GFP	1	Cell 1	x0.05	0.137027
GFP	1	Cell 1	x0.05	0.0675565
GFP	1	Cell 1	x0.05	0.0789453
GFP	1	Cell 1	x0.05	0.0632663
GFP	1	Cell 1	x0.05	0.155777
GFP	1	Cell 1	x0.05	0.0782755
GFP	1	Cell 1	x0.05	0.0989407
GFP	1	Cell 1	x0.05	0.0942046
GFP	1	Cell 1	x0.05	0.148215
GFP	1	Cell 1	x0.05	0.150855
GFP	1	Cell 1	x0.05	0.104893
GFP	1	Cell 1	x0.05	0.103413
GFP	1	Cell 1	x0.05	0.165163
GFP	1	Cell 1	x0.05	0.0423912
GFP	1	Cell 1	x0.05	0.20683
GFP	1	Cell 1	x0.05	0.071494
GFP	1	Cell 1	x0.05	0.105332
GFP	1	Cell 1	x0.05	0.116133
GFP	1	Cell 1	x0.05	0.111672
GFP	1	Cell 1	x0.05	0.117181
GFP	1	Cell 1	x0.05	0.149402
GFP	1	Cell 1	x0.05	0.0879699
GFP	1	Cell 1	x0.05	0.12991
GFP	1	Cell 1	x0.05	0.00873145
GFP	1	Cell 1	x0.05	0.0771139
GFP	1	Cell 1	x0.05	0.172276
GFP	1	Cell 1	x0.05	0.12579
GFP	1	Cell 1	x0.05	0.046262
GFP	1	Cell 1	x0.05	0.0259213
GFP	1	Cell 1	x0.05	0.319443
GFP	1	Cell 1	x0.05	0.106525
GFP	1	Cell 1	x0.05	0.232722
GFP	1	Cell 1	x0.05	0.157589
GFP	1	Cell 1	x0.05	0.0195305
GFP	1	Cell 1	x0.05	0.130658
GFP	1	Cell 1	x0.05	0.0600939
GFP	1	Cell 1	x0.05	0.108964
GFP	1	Cell 1	x0.05	0.0371775
GFP	1	Cell 1	x0.05	0.0250143
GFP	1	Cell 1	x0.05	0.0811839
GFP	1	Cell 1	x0.05	0.144512
GFP	1	Cell 1	x0.05	0.102368
GFP	1	Cell 1	x0.05	0.132795
GFP	1	Cell 1	x0.05	0.1162
GFP	1	Cell 1	x0.05	0.116579
GFP	1	Cell 1	x0.05	0.0492228
GFP	1	Cell 1	x0.05	0.144066
GFP	1	Cell 1	x0.05	0.232786
GFP	1	Cell 1	x0.05	0.179309
GFP	1	Cell 1	x0.05	0.0460627
GFP	1	Cell 1	x0.05	0.0541419
GFP	1	Cell 1	x0.05	0.169128
GFP	1	Cell 1	x0.05	0.102452
GFP	1	Cell 1	x0.05	0.224478
GFP	1	Cell 1	x0.05	0.1185
GFP	1	Cell 1	x0.05	0.0702551
GFP	1	Cell 1	x0.05	0.078755
GFP	1	Cell 1	x0.05	0.145266
GFP	1	Cell 1	x0.05	0.106755
GFP	1	Cell 1	x0.05	0.073937
GFP	1	Cell 1	x0.05	0.214642
GFP	1	Cell 1	x0.05	0.0373455
GFP	1	Cell 1	x0.05	0.0805642
GFP	1	Cell 1	x0.05	0.0480845
GFP	1	Cell 1	x0.05	0.11712
GFP	1	Cell 1	x0.05	0.14425
GFP	1	Cell 1	x0.05	0.13179
GFP	1	Cell 1	x0.05	0.108428
GFP	1	Cell 1	x0.05	0.112879
GFP	1	Cell 1	x0.05	0.0518097
GFP	1	Cell 1	x0.05	0.103966
GFP	1	Cell 1	x0.05	0.0882406
GFP	1	Cell 1	x0.05	0.180394
GFP	1	Cell 1	x0.05	0.117773
GFP	1	Cell 1	x0.05	0.0680443
GFP	1	Cell 1	x0.05	0.0464458
GFP	1	Cell 1	x0.05	0.0583685
GFP	1	Cell 1	x0.05	0.100683
GFP	1	Cell 1	x0.05	0.169635
GFP	1	Cell 1	x0.05	0.0874586
GFP	1	Cell 1	x0.05	0.18318
GFP	1	Cell 1	x0.05	0.0964966
GFP	1	Cell 1	x0.05	0.0576005
GFP	1	Cell 1	x0.05	0.0728178
GFP	1	Cell 1	x0.05	0.0684387
GFP	1	Cell 1	x0.05	0.116139
GFP	1	Cell 1	x0.05	0.0652005
GFP	1	Cell 1	x0.05	0.120727
GFP	1	Cell 1	x0.05	0.115863
GFP	1	Cell 1	x0.05	0.105602
GFP	1	Cell 1	x0.05	0.105615
GFP	1	Cell 1	x0.05	0.0913367
GFP	1	Cell 1	x0.05	0.06033
GFP	1	Cell 1	x0.05	0.213478
GFP	1	Cell 1	x0.05	0.189879
GFP	1	Cell 1	x0.05	0.0754327
GFP	1	Cell 1	x0.05	0.132046
GFP	1	Cell 1	x0.05	0.109503
GFP	1	Cell 1	x0.05	0.0426544
GFP	1	Cell 1	x0.05	0.00686616
GFP	1	Cell 1	x0.05	0.111011
GFP	1	Cell 1	x0.05	0.0360835
GFP	1	Cell 1	x0.05	0.0737971
GFP	1	Cell 1	x0.05	0.095355
GFP	1	Cell 1	x0.05	0.133872
GFP	1	Cell 1	x0.05	0.134313
GFP	1	Cell 1	x0.05	0.126394
GFP	1	Cell 1	x0.05	0.119234
GFP	1	Cell 1	x0.05	0.0661349
GFP	1	Cell 1	x0.05	0.10019
GFP	1	Cell 1	x0.05	0.167605
GFP	1	Cell 1	x0.05	0.148376
GFP	1	Cell 1	x0.05	0.122783
GFP	1	Cell 1	x0.05	0.205956
GFP	1	Cell 1	x0.05	0.0851823
GFP	1	Cell 1	x0.05	0.0765246
GFP	1	Cell 1	x0.05	0.186413
GFP	1	Cell 1	x0.05	0.126329
GFP	1	Cell 1	x0.05	0.0973355
GFP	1	Cell 1	x0.05	0.0683068
GFP	1	Cell 1	x0.05	0.10046
GFP	1	Cell 1	x0.05	0.080129
GFP	1	Cell 1	x0.05	0.04133
GFP	1	Cell 1	x0.05	0.0591639
GFP	1	Cell 1	x0.05	0.0609909
GFP	1	Cell 1	x0.05	0.133529
GFP	1	Cell 1	x0.05	0.0921596
GFP	1	Cell 1	x0.05	0.0863744
GFP	1	Cell 1	x0.05	0.0728905
GFP	1	Cell 1	x0.05	0.0940976
GFP	1	Cell 1	x0.05	0.0579778
GFP	1	Cell 1	x0.05	0.0562213
GFP	1	Cell 1	x0.05	0.0844355
GFP	1	Cell 1	x0.05	0.0738472
GFP	1	Cell 1	x0.05	0.0450606
GFP	1	Cell 1	x0.05	0.00578504
GFP	1	Cell 1	x0.05	0.0730323
GFP	1	Cell 1	x0.05	0.155039
GFP	1	Cell 1	x0.05	0.060819
GFP	1	Cell 1	x0.05	0.132183
GFP	1	Cell 1	x0.05	0.172958
GFP	1	Cell 1	x0.05	0.153509
GFP	1	Cell 1	x0.05	0.0915345
GFP	1	Cell 1	x0.05	0.00526703
GFP	1	Cell 1	x0.05	0.054326
GFP	1	Cell 1	x0.05	0.138528
GFP	1	Cell 1	x0.05	0.0841174
GFP	1	Cell 1	x0.05	0.130308
GFP	1	Cell 1	x0.05	0.0118067
GFP	1	Cell 1	x0.05	0.0755622
GFP	1	Cell 1	x0.05	0.126456
GFP	1	Cell 1	x0.05	0.140186
GFP	1	Cell 1	x0.05	0.0769208
GFP	1	Cell 1	x0.05	0.172111
GFP	1	Cell 1	x0.05	0.00745877
GFP	1	Cell 1	x0.05	0.0654409
GFP	1	Cell 1	x0.05	0.0517034
GFP	1	Cell 1	x0.05	0.225509
GFP	1	Cell 1	x0.05	0.0772355
GFP	1	Cell 1	x0.05	0.180601
GFP	1	Cell 1	x0.05	0.0730055
GFP	1	Cell 1	x0.05	0.0571831
GFP	1	Cell 1	x0.05	0.0555871
GFP	1	Cell 1	x0.05	0.0808769
GFP	1	Cell 1	x0.05	0.0294165
GFP	1	Cell 1	x0.05	0.102596
GFP	1	Cell 1	x0.05	0.0783309
GFP	1	Cell 1	x0.05	0.1388
GFP	1	Cell 1	x0.05	0.111211
GFP	1	Cell 1	x0.05	0.0359633
GFP	1	Cell 1	x0.05	0.0664661
GFP	1	Cell 1	x0.05	0.0564933
GFP	1	Cell 1	x0.05	0.139231
GFP	1	Cell 1	x0.05	0.121305
GFP	1	Cell 1	x0.05	0.214593
GFP	1	Cell 1	x0.05	0.0280031
GFP	1	Cell 1	x0.05	0.164856
GFP	1	Cell 1	x0.05	0.0159136
GFP	1	Cell 1	x0.05	0.155911
GFP	1	Cell 1	x0.05	0.0270252
GFP	1	Cell 1	x0.05	0.120592
GFP	1	Cell 1	x0.05	0.0961425
GFP	1	Cell 1	x0.05	0.137114
GFP	1	Cell 1	x0.05	0.0596865
GFP	1	Cell 1	x0.05	0.0904994
GFP	1	Cell 1	x0.05	0.258666
GFP	1	Cell 1	x0.05	0.103694
GFP	1	Cell 1	x0.05	0.0104576
GFP	1	Cell 1	x0.05	0.170999
GFP	1	Cell 1	x0.05	0.0798818
GFP	1	Cell 1	x0.05	0.0646273
GFP	1	Cell 1	x0.05	0.00534407
GFP	1	Cell 1	x0.05	0.117634
GFP	1	Cell 1	x0.05	0.0619604
GFP	1	Cell 1	x0.05	0.194794
GFP	1	Cell 1	x0.05	0.108931
GFP	1	Cell 1	x0.05	0.0369351
GFP	1	Cell 1	x0.05	0.120084
GFP	1	Cell 1	x0.05	0.0625338
GFP	1	Cell 1	x0.05	0.109416
GFP	1	Cell 1	x0.05	0.0349516
GFP	1	Cell 1	x0.05	0.119535
GFP	1	Cell 1	x0.05	0.145565
GFP	1	Cell 1	x0.05	0.147702
GFP	1	Cell 1	x0.05	0.0791186
GFP	1	Cell 1	x0.05	0.0715414
GFP	1	Cell 1	x0.05	0.118973
GFP	1	Cell 1	x0.05	0.104969
GFP	1	Cell 1	x0.05	0.0868322
GFP	1	Cell 1	x0.05	0.0310782
GFP	1	Cell 1	x0.05	0.0234356
GFP	1	Cell 1	x0.05	0.0291799
GFP	1	Cell 1	x0.05	0.0666507
GFP	1	Cell 1	x0.05	0.0407107
GFP	1	Cell 1	x0.05	0.126927
GFP	1	Cell 1	x0.05	0.011018
GFP	1	Cell 1	x0.05	0.139508
GFP	1	Cell 1	x0.05	0.0568527
GFP	1	Cell 1	x0.05	0.0599542
GFP	1	Cell 1	x0.05	0.0736489
GFP	1	Cell 1	x0.05	0.144087
GFP	1	Cell 1	x0.05	0.0843632
GFP	1	Cell 1	x0.05	0.124001
GFP	1	Cell 1	x0.05	0.105737
GFP	1	Cell 1	x0.05	0.0803032
GFP	1	Cell 1	x0.05	0.181764
GFP	1	Cell 1	x0.05	0.0447542
GFP	1	Cell 1	x0.05	0.186088
GFP	1	Cell 1	x0.05	0.0371007
GFP	1	Cell 1	x0.05	0.0716855
GFP	1	Cell 1	x0.05	0.046954
GFP	1	Cell 1	x0.05	0.134754
GFP	1	Cell 1	x0.05	0.0926114
GFP	1	Cell 1	x0.05	0.0641218
GFP	1	Cell 1	x0.05	0.240206
GFP	1	Cell 1	x0.05	0.0757017
GFP	1	Cell 1	x0.05	0.116809
GFP	1	Cell 1	x0.05	0.094344
GFP	1	Cell 1	x0.05	0.0331216
GFP	1	Cell 1	x0.05	0.0584565
GFP	1	Cell 1	x0.05	0.0450002
GFP	1	Cell 1	x0.05	0.0898842
GFP	1	Cell 1	x0.05	0.179017
GFP	1	Cell 1	x0.05	0.134309
GFP	1	Cell 1	x0.05	0.131841
GFP	1	Cell 1	x0.05	0.0525432
GFP	1	Cell 1	x0.05	0.1044
GFP	1	Cell 1	x0.05	0.0301223
GFP	1	Cell 1	x0.05	0.0706589
GFP	1	Cell 1	x0.05	0.0593261
GFP	1	Cell 1	x0.05	0.0477229
GFP	1	Cell 1	x0.05	0.205134
GFP	1	Cell 1	x0.05	0.0735506
GFP	1	Cell 1	x0.05	0.0823176
GFP	1	Cell 1	x0.05	0.137823
GFP	1	Cell 1	x0.05	0.025373
GFP	1	Cell 1	x0.05	0.179997
GFP	1	Cell 1	x0.05	0.0644393
GFP	1	Cell 1	x0.05	0.0593872
GFP	1	Cell 1	x0.05	0.113021
GFP	1	Cell 1	x0.05	0.0993113
GFP	1	Cell 1	x0.05	0.0877147
GFP	1	Cell 1	x0.05	0.132532
GFP	1	Cell 1	x0.05	0.0995789
GFP	1	Cell 1	x0.05	0.250394
GFP	1	Cell 1	x0.05	0.0887573
GFP	1	Cell 1	x0.05	0.0934367
GFP	1	Cell 1	x0.05	0.00795093
GFP	1	Cell 1	x0.05	0.0148532
GFP	1	Cell 1	x0.05	0.0885469
GFP	1	Cell 1	x0.05	0.050879
GFP	1	Cell 1	x0.05	0.0750791
GFP	1	Cell 1	x0.05	0.155813
GFP	1	Cell 1	x0.05	0.115315
GFP	1	Cell 1	x0.05	0.0208851
GFP	1	Cell 1	x0.05	0.0178719
GFP	1	Cell 1	x0.05	0.090039
GFP	1	Cell 1	x0.05	0.1193
GFP	1	Cell 1	x0.05	0.00339613
GFP	1	Cell 1	x0.05	0.117308
GFP	1	Cell 1	x0.05	0.178517
GFP	1	Cell 1	x0.05	0.353786
GFP	1	Cell 1	x0.05	0.0828946
GFP	1	Cell 1	x0.05	0.0865464
GFP	1	Cell 1	x0.05	0.02823
GFP	1	Cell 1	x0.05	0.115924
GFP	1	Cell 1	x0.05	0.0604496
GFP	1	Cell 1	x0.05	0.0745812
GFP	1	Cell 1	x0.05	0.107702
GFP	1	Cell 1	x0.05	0.135284
GFP	1	Cell 1	x0.05	0.0958677
GFP	1	Cell 1	x0.05	0.170526
GFP	1	Cell 1	x0.05	0.0818649
GFP	1	Cell 1	x0.05	0.167555
GFP	1	Cell 1	x0.05	0.111042
GFP	1	Cell 1	x0.05	0.0972782
GFP	1	Cell 1	x0.05	0.167052
GFP	1	Cell 1	x0.05	0.221682
GFP	1	Cell 1	x0.05	0.112498
GFP	1	Cell 1	x0.05	0.0413655
GFP	1	Cell 1	x0.05	0.0750567
GFP	1	Cell 1	x0.05	0.103827
GFP	1	Cell 1	x0.05	0.145497
GFP	1	Cell 1	x0.05	0.136191
GFP	1	Cell 1	x0.05	0.0182352
GFP	1	Cell 1	x0.05	0.122587
GFP	1	Cell 1	x0.05	0.100866
GFP	1	Cell 1	x0.05	0.147777
GFP	1	Cell 1	x0.05	0.156047
GFP	1	Cell 1	x0.05	0.113457
GFP	1	Cell 1	x0.05	0.0991312
GFP	1	Cell 1	x0.05	0.105613
GFP	1	Cell 1	x0.05	0.158429
GFP	1	Cell 1	x0.05	0.180249
GFP	1	Cell 1	x0.05	0.0556999
GFP	1	Cell 1	x0.05	0.0454973
GFP	1	Cell 1	x0.05	0.0773344
GFP	1	Cell 1	x0.05	0.097733
GFP	1	Cell 1	x0.05	0.224355
GFP	1	Cell 1	x0.05	0.214423
GFP	1	Cell 1	x0.05	0.12858
GFP	1	Cell 1	x0.05	0.0250171
GFP	1	Cell 1	x0.05	0.0615157
GFP	1	Cell 1	x0.05	0.217439
GFP	1	Cell 1	x0.05	0.149364
GFP	1	Cell 1	x0.05	0.135635
GFP	1	Cell 1	x0.05	0.0216066
GFP	1	Cell 1	x0.05	0.13304
GFP	1	Cell 1	x0.05	0.052493
GFP	1	Cell 1	x0.05	0.00451708
GFP	1	Cell 1	x0.05	0.0488718
GFP	1	Cell 1	x0.05	0.089571
GFP	1	Cell 1	x0.05	0.0162379
GFP	1	Cell 1	x0.05	0.101184
GFP	1	Cell 1	x0.05	0.0534924
GFP	1	Cell 1	x0.05	0.00901582
GFP	1	Cell 1	x0.05	0.156911
GFP	1	Cell 1	x0.05	0.14763
GFP	1	Cell 1	x0.05	0.0155576
GFP	1	Cell 1	x0.05	0.103354
GFP	1	Cell 1	x0.05	0.122569
GFP	1	Cell 1	x0.05	0.0702463
GFP	1	Cell 1	x0.05	0.0820991
GFP	1	Cell 1	x0.05	0.157107
GFP	1	Cell 1	x0.05	0.0388706
GFP	1	Cell 1	x0.05	0.0440897
GFP	1	Cell 1	x0.05	0.197669
GFP	1	Cell 1	x0.05	0.286324
GFP	1	Cell 1	x0.05	0.239766
GFP	1	Cell 1	x0.05	0.0969743
GFP	1	Cell 1	x0.05	0.0858372
GFP	1	Cell 1	x0.05	0.141849
GFP	1	Cell 1	x0.05	0.0752983
GFP	1	Cell 1	x0.05	0.0569171
GFP	1	Cell 1	x0.05	0.0491066
GFP	1	Cell 1	x0.05	0.0398513
GFP	1	Cell 1	x0.05	0.0602272
GFP	1	Cell 1	x0.05	0.0747756
GFP	1	Cell 1	x0.05	0.0205883
GFP	1	Cell 1	x0.05	0.0418074
GFP	1	Cell 1	x0.05	0.186623
GFP	1	Cell 1	x0.05	0.117679
GFP	1	Cell 1	x0.05	0.071328
GFP	1	Cell 1	x0.05	0.018332
GFP	1	Cell 1	x0.05	0.0526638
GFP	1	Cell 1	x0.05	0.0947587
GFP	1	Cell 1	x0.05	0.0264972
GFP	1	Cell 1	x0.05	0.101961
GFP	1	Cell 1	x0.05	0.0710844
GFP	1	Cell 1	x0.05	0.116233
[truncated: 168,875 more rows]
