# Supplementary material for: Interdependence of plasma membrane nanoscale dynamics of a kinase and its cognate substrate underlies Arabidopsis response to viral infection
Source: eLife. 2025 May 2;12:RP90309. doi: 10.7554/eLife.90309 (PMC12048157; doi:10.7554/eLife.90309)
Supplement: Figure 2—source data 5. [file elife-90309-fig2-data5.xlsx]

## Sheet: Feuil1
Condition	Experiment	Cell	Diameter (nm)
GFP	1	1	156.41
GFP	1	1	424.44
GFP	1	1	276.381
GFP	1	1	203.837
GFP	1	1	153.81
GFP	1	1	105.536
GFP	1	1	194.718
GFP	1	1	144.544
GFP	1	1	424.824
GFP	1	1	412.677
GFP	1	1	220.987
GFP	1	1	221.251
GFP	1	1	158.383
GFP	1	1	262.845
GFP	1	1	133.242
GFP	1	1	430.43
GFP	1	1	145.733
GFP	1	1	209.21
GFP	1	1	177.089
GFP	1	1	173.386
GFP	1	1	231.648
GFP	1	1	316.526
GFP	1	1	227.679
GFP	1	1	110.836
GFP	1	1	181.411
GFP	1	1	323.87
GFP	1	1	123.711
GFP	1	1	293.279
GFP	1	1	149.478
GFP	1	1	107.554
GFP	1	1	388.979
GFP	1	1	86.8634
GFP	1	1	106.158
GFP	1	1	96.1127
GFP	1	1	155.53
GFP	1	1	124.293
GFP	1	1	94.8981
GFP	1	1	141.093
GFP	1	1	200.296
GFP	1	1	156.6
GFP	1	1	115.83
GFP	1	1	173.808
GFP	1	1	132.801
GFP	1	1	171.183
GFP	1	1	119.86
GFP	1	1	76.8699
GFP	1	1	130.44
GFP	1	1	171.862
GFP	1	1	187
GFP	1	1	177.375
GFP	1	1	122.846
GFP	1	1	123.105
GFP	1	1	133.872
GFP	1	1	114.303
GFP	1	1	86.3632
GFP	1	1	140.531
GFP	1	1	125.291
GFP	1	1	95.1425
GFP	1	2	75.8695
GFP	1	2	176.833
GFP	1	2	119.367
GFP	1	2	73.367
GFP	1	2	316.339
GFP	1	2	269.784
GFP	1	2	113.559
GFP	1	2	239.425
GFP	1	2	98.2811
GFP	1	2	461.678
GFP	1	2	98.1546
GFP	1	2	86.3009
GFP	1	2	362.918
GFP	1	2	132.504
GFP	1	2	173.238
GFP	1	2	256.048
GFP	1	2	66.282
GFP	1	2	135.138
GFP	1	2	107.652
GFP	1	2	138.542
GFP	1	2	120.42
GFP	1	2	161.768
GFP	1	2	207.741
GFP	1	2	146.367
GFP	1	2	206.385
GFP	1	2	94.46
GFP	1	2	138.908
GFP	1	2	143.563
GFP	1	2	122.148
GFP	1	2	84.7782
GFP	1	2	164.26
GFP	1	2	162.74
GFP	1	2	84.9944
GFP	1	2	82.5378
GFP	1	2	119.458
GFP	1	2	57.4281
GFP	1	2	113.948
GFP	1	2	116.488
GFP	1	2	84.4414
GFP	1	2	125.741
GFP	1	2	105.447
GFP	1	2	142.194
GFP	1	2	116.673
GFP	1	2	124.818
GFP	1	2	153.451
GFP	1	2	119.979
GFP	1	2	81.7738
GFP	1	2	105.512
GFP	1	2	42.867
GFP	1	2	94.8048
GFP	1	2	89.1138
GFP	1	2	61.5337
GFP	1	2	152.173
GFP	1	2	84.8668
GFP	1	3	101.812
GFP	1	3	229.444
GFP	1	3	375.9
GFP	1	3	86.1984
GFP	1	3	173.353
GFP	1	3	80.6019
GFP	1	3	100.974
GFP	1	3	73.6511
GFP	1	3	155.865
GFP	1	3	131.459
GFP	1	3	108.523
GFP	1	3	135.42
GFP	1	3	117.314
GFP	1	3	181.532
GFP	1	3	127.929
GFP	1	3	129.39
GFP	1	3	102.363
GFP	1	3	77.3301
GFP	1	3	89.6259
GFP	1	3	138.455
GFP	1	3	125.376
GFP	1	3	88.1058
GFP	1	3	158.114
GFP	1	3	92.3818
GFP	1	3	265.356
GFP	1	3	91.8289
GFP	1	3	251.388
GFP	1	3	114.11
GFP	1	3	91.9593
PlAMV	1	1	125.515
PlAMV	1	1	260.332
PlAMV	1	1	92.0191
PlAMV	1	1	178.779
PlAMV	1	1	103.15
PlAMV	1	1	254.086
PlAMV	1	1	238.611
PlAMV	1	1	247.245
PlAMV	1	1	171.524
PlAMV	1	1	197.542
PlAMV	1	1	108.334
PlAMV	1	1	195.934
PlAMV	1	1	276.964
PlAMV	1	1	84.8944
PlAMV	1	1	63.6667
PlAMV	1	1	70.6147
PlAMV	1	1	127.237
PlAMV	1	1	136.712
PlAMV	1	1	66.3075
PlAMV	1	1	202.044
PlAMV	1	1	131.56
PlAMV	1	1	163.668
PlAMV	1	1	149.118
PlAMV	1	1	166.232
PlAMV	1	1	63.619
PlAMV	1	1	118.793
PlAMV	1	1	138.699
PlAMV	1	1	147.123
PlAMV	1	1	162.073
PlAMV	1	1	56.823
PlAMV	1	1	125.026
PlAMV	1	1	52.9466
PlAMV	1	1	122.389
PlAMV	1	1	136.446
PlAMV	1	1	102.873
PlAMV	1	1	119.352
PlAMV	1	1	97.3293
PlAMV	1	1	93.7637
PlAMV	1	1	86.2849
PlAMV	1	1	75.5491
PlAMV	1	1	133.888
PlAMV	1	1	131.104
PlAMV	1	1	79.9404
PlAMV	1	1	121.638
PlAMV	1	1	100.987
PlAMV	1	1	102.627
PlAMV	1	1	72.0526
PlAMV	1	1	134.468
PlAMV	1	2	106.891
PlAMV	1	2	64.0777
PlAMV	1	2	186.205
PlAMV	1	2	196.892
PlAMV	1	2	108.356
PlAMV	1	2	111.674
PlAMV	1	2	130.061
PlAMV	1	2	134.4
PlAMV	1	2	187.687
PlAMV	1	2	209.359
PlAMV	1	2	319.746
PlAMV	1	2	248.149
PlAMV	1	2	123.325
PlAMV	1	2	252.581
PlAMV	1	2	120.126
PlAMV	1	2	129.93
PlAMV	1	2	64.5367
PlAMV	1	2	128.249
PlAMV	1	2	214.563
PlAMV	1	2	110.589
PlAMV	1	2	176.434
PlAMV	1	2	122.585
PlAMV	1	2	216.942
PlAMV	1	2	139.564
PlAMV	1	2	97.6745
PlAMV	1	2	122.773
PlAMV	1	2	115.309
PlAMV	1	2	136.773
PlAMV	1	2	166.311
PlAMV	1	2	107.324
PlAMV	1	2	199.373
PlAMV	1	2	91.8786
PlAMV	1	2	107.958
PlAMV	1	2	152.518
PlAMV	1	2	148.189
PlAMV	1	2	107.755
PlAMV	1	2	212.174
PlAMV	1	2	71.3392
PlAMV	1	2	107.295
PlAMV	1	2	78.7771
PlAMV	1	2	72.0679
PlAMV	1	2	97.3319
PlAMV	1	2	100.521
PlAMV	1	2	35.5639
PlAMV	1	2	59.4489
PlAMV	1	2	117.236
PlAMV	1	2	47.5174
PlAMV	1	2	55.8729
PlAMV	1	2	127.486
PlAMV	1	2	77.0299
PlAMV	1	2	78.363
PlAMV	1	2	72.5514
PlAMV	1	2	77.5907
PlAMV	1	2	90.366
PlAMV	1	2	59.9381
PlAMV	1	2	87.0466
PlAMV	1	2	47.9781
PlAMV	1	2	56.5765
PlAMV	1	2	83.9496
PlAMV	1	2	28.4087
PlAMV	1	2	68.7095
PlAMV	1	2	94.8847
PlAMV	1	2	98.7723
PlAMV	1	2	89.9356
PlAMV	1	2	74.7229
PlAMV	1	2	50.3454
PlAMV	1	2	28.6265
PlAMV	1	2	90.6509
PlAMV	1	2	70.2829
PlAMV	1	2	52.2674
PlAMV	1	2	94.4893
PlAMV	1	2	138.535
PlAMV	1	2	124.608
PlAMV	1	2	135.536
PlAMV	1	2	46.4994
PlAMV	1	2	50.1298
PlAMV	1	2	64.7967
PlAMV	1	2	168.267
PlAMV	1	2	161.972
PlAMV	1	2	100.967
PlAMV	1	2	104.709
PlAMV	1	2	81.7795
PlAMV	1	2	168.257
PlAMV	1	2	23.9009
PlAMV	1	2	127.404
PlAMV	1	2	190.544
PlAMV	1	2	154.05
PlAMV	1	2	175.148
PlAMV	1	2	99.3466
PlAMV	1	2	108.858
PlAMV	1	2	173.271
PlAMV	1	2	76.407
PlAMV	1	2	80.9458
PlAMV	1	2	101.15
PlAMV	1	2	65.8176
PlAMV	1	2	28.7727
PlAMV	1	2	65.8539
PlAMV	1	2	52.9291
PlAMV	1	2	147.663
PlAMV	1	2	133.592
PlAMV	1	2	83.4677
PlAMV	1	2	51.5992
PlAMV	1	2	86.0822
PlAMV	1	2	231.423
PlAMV	1	2	155.484
PlAMV	1	2	79.131
PlAMV	1	2	78.812
PlAMV	1	2	74.5362
PlAMV	1	2	28.7333
PlAMV	1	2	149.918
PlAMV	1	2	98.0722
PlAMV	1	3	167.077
PlAMV	1	3	292.462
PlAMV	1	3	228.681
PlAMV	1	3	191.795
PlAMV	1	3	323.974
PlAMV	1	3	84.8912
PlAMV	1	3	153.751
PlAMV	1	3	140.996
PlAMV	1	3	154.328
PlAMV	1	3	262.901
PlAMV	1	3	149.679
PlAMV	1	3	105.911
PlAMV	1	3	95.5436
PlAMV	1	3	73.5706
PlAMV	1	3	122.562
PlAMV	1	3	176.884
PlAMV	1	3	96.5231
PlAMV	1	3	79.1457
PlAMV	1	3	234.408
PlAMV	1	3	179.545
PlAMV	1	3	57.9913
PlAMV	1	3	126.609
PlAMV	1	3	132.08
PlAMV	1	3	193.921
PlAMV	1	3	85.7853
PlAMV	1	3	63.268
PlAMV	1	3	82.8503
PlAMV	1	3	115.392
PlAMV	1	3	123.754
PlAMV	1	3	135.783
PlAMV	1	3	145.005
PlAMV	1	3	65.3067
PlAMV	1	3	97.712
PlAMV	1	3	202.643
PlAMV	1	3	76.4884
PlAMV	1	3	123.301
PlAMV	1	3	74.73
PlAMV	1	3	195.141
PlAMV	1	3	161.543
PlAMV	1	3	95.737
PlAMV	1	3	172.693
PlAMV	1	3	124.234
PlAMV	1	3	76.755
PlAMV	1	3	120.686
PlAMV	1	3	219.874
PlAMV	1	3	48.5824
PlAMV	1	3	186.318
PlAMV	1	3	101.674
PlAMV	1	3	69.0032
PlAMV	1	3	51.7448
PlAMV	1	3	53.5584
PlAMV	1	3	121.124
PlAMV	1	3	82.2003
PlAMV	1	3	53.4506
PlAMV	1	3	81.1211
PlAMV	1	3	36.1928
PlAMV	1	3	87.2683
PlAMV	1	3	87.569
PlAMV	1	3	108.006
PlAMV	1	3	43.6755
PlAMV	1	3	45.7578
PlAMV	1	3	109.905
PlAMV	1	3	56.9621
PlAMV	1	3	122.854
PlAMV	1	3	67.4693
PlAMV	1	3	114
PlAMV	1	3	72.0152
PlAMV	1	3	91.9037
PlAMV	1	3	78.7248
GFP	2	1	107.826
GFP	2	1	148.115
GFP	2	1	106.011
GFP	2	1	301.406
GFP	2	1	24.4507
GFP	2	1	49.7386
GFP	2	1	125.224
GFP	2	1	125.795
GFP	2	1	82.8202
GFP	2	1	45.4466
GFP	2	1	204.245
GFP	2	1	86.5643
GFP	2	1	152.644
GFP	2	1	116.757
GFP	2	1	258.999
GFP	2	1	135.428
GFP	2	1	64.6717
GFP	2	1	38.1008
GFP	2	1	56.5628
GFP	2	1	80.3919
GFP	2	1	96.8209
GFP	2	1	41.5269
GFP	2	1	45.8607
GFP	2	1	62.6532
GFP	2	1	16.4045
GFP	2	1	68.8412
GFP	2	1	22.4138
GFP	2	1	21.7777
GFP	2	1	38.2501
GFP	2	1	32.143
GFP	2	1	96.0034
GFP	2	1	56.1677
GFP	2	1	85.7512
GFP	2	1	43.27
GFP	2	1	51.0267
GFP	2	1	41.4376
GFP	2	1	54.6485
GFP	2	1	138.743
GFP	2	1	49.4844
GFP	2	1	42.2706
GFP	2	1	37.4105
GFP	2	1	74.211
GFP	2	1	55.8368
GFP	2	1	35.5636
GFP	2	1	37.9782
GFP	2	1	37.9205
GFP	2	1	56.577
GFP	2	1	42.4752
GFP	2	1	36.4448
GFP	2	1	84.0628
GFP	2	1	91.8193
GFP	2	1	48.837
GFP	2	1	26.7235
GFP	2	1	37.201
GFP	2	1	63.4051
GFP	2	1	47.5925
GFP	2	1	59.1796
GFP	2	1	61.1689
GFP	2	1	48.2255
GFP	2	1	76.0971
GFP	2	1	21.048
GFP	2	1	52.0017
GFP	2	1	42.3182
GFP	2	1	60.6812
GFP	2	1	44.3164
GFP	2	1	42.421
GFP	2	1	36.7657
GFP	2	1	43.9835
GFP	2	1	57.6722
GFP	2	1	44.9131
GFP	2	1	38.4748
GFP	2	1	56.1395
GFP	2	1	29.1573
GFP	2	1	57.646
GFP	2	1	48.5149
GFP	2	1	38.9744
GFP	2	1	47.7788
GFP	2	1	79.0363
GFP	2	1	20.2909
GFP	2	1	35.0197
GFP	2	1	36.9302
GFP	2	1	39.0454
GFP	2	1	48.3756
GFP	2	1	24.3269
GFP	2	1	85.6569
GFP	2	1	36.7067
GFP	2	1	33.3573
GFP	2	1	51.3629
GFP	2	1	87.3259
GFP	2	1	34.3162
GFP	2	1	35.2691
GFP	2	1	36.8339
GFP	2	1	75.4114
GFP	2	1	24.1986
GFP	2	1	43.229
GFP	2	1	19.2496
GFP	2	1	31.1241
GFP	2	1	52.0342
GFP	2	1	53.8164
GFP	2	1	44.6285
GFP	2	1	37.1429
GFP	2	1	34.4332
GFP	2	1	40.5212
GFP	2	1	58.2423
GFP	2	1	45.6454
GFP	2	1	28.1042
GFP	2	1	25.0774
GFP	2	1	57.071
GFP	2	1	62.4853
GFP	2	1	26.427
GFP	2	1	64.8557
GFP	2	1	39.1631
GFP	2	1	42.0233
GFP	2	1	35.7201
GFP	2	1	57.9638
GFP	2	1	56.0848
GFP	2	1	24.7143
GFP	2	1	61.1694
GFP	2	1	32.6049
GFP	2	1	40.8801
GFP	2	1	88.5727
GFP	2	2	71.5307
GFP	2	2	76.7434
GFP	2	2	40.4568
GFP	2	2	203.409
GFP	2	2	50.0097
GFP	2	2	44.0631
GFP	2	2	65.6217
GFP	2	2	358.646
GFP	2	2	32.3337
GFP	2	2	55.6332
GFP	2	2	53.5233
GFP	2	2	51.3075
GFP	2	2	116.395
GFP	2	2	204.408
GFP	2	2	34.6184
GFP	2	2	61.1693
GFP	2	2	33.1117
GFP	2	2	35.0657
GFP	2	2	32.9421
GFP	2	2	39.9502
GFP	2	2	279.648
GFP	2	2	41.7748
GFP	2	2	32.8798
GFP	2	2	150.422
GFP	2	2	37.8947
GFP	2	2	58.2001
GFP	2	2	22.3145
GFP	2	2	33.6266
GFP	2	2	43.9384
GFP	2	2	113.024
GFP	2	2	21.9341
GFP	2	2	47.1454
GFP	2	2	188.41
GFP	2	2	52.8953
GFP	2	2	132.278
GFP	2	2	111.952
GFP	2	2	42.7464
GFP	2	2	61.3943
GFP	2	2	39.2191
GFP	2	2	40.9415
GFP	2	2	52.0655
GFP	2	2	64.2937
GFP	2	2	75.4176
GFP	2	2	20.221
GFP	2	2	39.1277
GFP	2	2	141.799
GFP	2	2	148.306
GFP	2	2	97.7611
GFP	2	2	23.5693
GFP	2	2	40.685
GFP	2	2	42.5582
GFP	2	2	34.8758
GFP	2	2	51.0441
GFP	2	2	41.1787
GFP	2	2	55.7681
GFP	2	2	30.1202
GFP	2	2	126.073
GFP	2	2	74.5815
GFP	2	2	58.6263
GFP	2	2	16.6209
GFP	2	2	26.3067
GFP	2	2	108.562
GFP	2	2	27.5863
GFP	2	2	69.2138
GFP	2	2	49.7418
GFP	2	2	56.869
GFP	2	2	41.4765
GFP	2	2	30.0282
GFP	2	2	48.665
GFP	2	2	38.3217
GFP	2	2	104.776
GFP	2	2	43.6225
GFP	2	2	48.7448
GFP	2	2	114.68
GFP	2	2	75.8247
GFP	2	2	113.518
GFP	2	2	60.6053
GFP	2	2	36.8369
GFP	2	2	127.989
GFP	2	2	115.65
GFP	2	2	151.309
GFP	2	2	88.919
GFP	2	2	68.88
GFP	2	2	54.2711
GFP	2	2	26.4869
GFP	2	2	62.3622
GFP	2	2	31.7811
GFP	2	2	56.2083
GFP	2	2	47.0991
GFP	2	2	44.4315
GFP	2	2	43.0994
GFP	2	2	48.5586
GFP	2	2	13.0165
GFP	2	2	41.1193
GFP	2	2	56.9484
GFP	2	2	33.2553
GFP	2	2	41.0527
GFP	2	2	26.2539
GFP	2	2	26.786
GFP	2	2	34.6274
GFP	2	2	73.3121
GFP	2	2	38.3145
GFP	2	2	25.071
GFP	2	2	22.512
GFP	2	2	37.1049
GFP	2	2	31.3781
GFP	2	2	29.9219
GFP	2	2	36.8631
GFP	2	2	84.8781
GFP	2	2	31.8891
GFP	2	2	56.3974
GFP	2	2	19.6391
GFP	2	2	51.9235
GFP	2	2	72.2095
GFP	2	2	14.5354
GFP	2	2	33.0773
GFP	2	2	52.8184
GFP	2	2	37.31
GFP	2	2	58.2401
GFP	2	2	38.9231
GFP	2	2	21.1544
GFP	2	2	38.7275
GFP	2	2	31.2927
GFP	2	2	45.7968
GFP	2	2	27.1376
GFP	2	2	39.6534
GFP	2	2	17.3236
GFP	2	2	37.2793
GFP	2	2	29.3523
GFP	2	2	38.8624
GFP	2	2	51.5971
GFP	2	2	22.7947
GFP	2	2	57.1552
GFP	2	2	30.6337
GFP	2	2	94.2052
GFP	2	2	45.5375
GFP	2	2	77.058
GFP	2	2	38.6443
GFP	2	2	49.6426
GFP	2	2	77.3314
GFP	2	2	46.8978
GFP	2	2	35.0854
GFP	2	2	47.8415
GFP	2	2	25.4943
GFP	2	2	80.4388
GFP	2	2	35.8298
GFP	2	2	36.6743
GFP	2	2	27.3142
GFP	2	2	32.5676
GFP	2	2	24.6218
GFP	2	2	34.1224
GFP	2	2	30.3282
GFP	2	2	20.8079
GFP	2	2	29.9282
GFP	2	2	34.99
GFP	2	2	51.9683
GFP	2	2	61.937
GFP	2	2	46.7809
GFP	2	2	82.9698
GFP	2	2	49.9099
GFP	2	2	33.0866
GFP	2	2	21.658
GFP	2	2	25.4037
GFP	2	2	65.3988
GFP	2	2	26.4709
GFP	2	2	26.9172
GFP	2	2	64.0453
GFP	2	2	52.3972
GFP	2	2	37.9684
GFP	2	2	65.522
GFP	2	2	42.7123
GFP	2	2	80.5245
GFP	2	2	84.0552
GFP	2	2	36.8498
GFP	2	2	15.8162
GFP	2	2	24.7992
GFP	2	2	90.1935
GFP	2	2	14.1778
GFP	2	2	78.1062
GFP	2	2	60.7855
GFP	2	2	41.122
GFP	2	2	50.3888
GFP	2	2	41.8408
GFP	2	2	32.5847
GFP	2	2	46.1482
GFP	2	2	73.1898
GFP	2	2	43.4985
GFP	2	2	25.5217
GFP	2	2	144.41
GFP	2	2	36.7242
GFP	2	2	16.222
GFP	2	2	45.5865
GFP	2	2	40.0399
GFP	2	2	20.004
GFP	2	2	139.182
GFP	2	2	37.4701
GFP	2	2	28.3869
GFP	2	2	30.7125
GFP	2	2	38.7497
GFP	2	2	39.9088
GFP	2	2	105.61
GFP	2	2	41.2836
GFP	2	2	81.7174
GFP	2	2	11.0647
GFP	2	2	21.4606
GFP	2	2	58.7127
GFP	2	2	45.3798
GFP	2	2	28.7433
GFP	2	2	40.3408
GFP	2	2	29.3973
GFP	2	2	45.5585
GFP	2	2	31.2314
GFP	2	2	47.4932
GFP	2	2	18.9386
GFP	2	2	42.3062
GFP	2	2	26.429
GFP	2	2	32.0889
GFP	2	2	32.3511
GFP	2	2	38.525
GFP	2	2	20.5163
GFP	2	2	39.5821
GFP	2	2	16.9462
GFP	2	2	46.0985
GFP	2	2	45.3523
GFP	2	2	25.1479
GFP	2	2	44.5013
GFP	2	2	37.1398
GFP	2	2	22.8096
GFP	2	2	49.9326
GFP	2	2	24.4282
GFP	2	2	28.8775
GFP	2	2	22.7093
GFP	2	2	44.8035
GFP	2	2	25.9755
GFP	2	2	76.7493
GFP	2	2	44.7946
GFP	2	2	48.9648
GFP	2	2	36.471
GFP	2	2	33.4983
GFP	2	2	52.8227
GFP	2	2	34.6658
GFP	2	2	29.7683
GFP	2	2	37.0671
GFP	2	2	37.4282
GFP	2	2	21.4684
GFP	2	2	32.1303
GFP	2	2	25.6283
GFP	2	2	32.2947
GFP	2	2	20.546
GFP	2	2	46.9951
GFP	2	2	26.4825
GFP	2	2	47.4035
GFP	2	2	38.6562
GFP	2	2	28.4224
GFP	2	2	64.8123
GFP	2	2	29.7975
GFP	2	2	38.2133
GFP	2	2	33.9898
GFP	2	2	42.4459
GFP	2	2	24.8161
GFP	2	2	36.5074
GFP	2	2	29.1151
GFP	2	2	47.7976
GFP	2	2	34.7203
GFP	2	2	24.4517
GFP	2	2	45.7561
GFP	2	2	28.2418
GFP	2	2	35.0541
GFP	2	2	43.6889
GFP	2	2	20.5952
GFP	2	2	46.0232
GFP	2	2	42.4975
GFP	2	2	52.7452
GFP	2	2	31.2529
GFP	2	2	48.9636
GFP	2	2	47.8561
GFP	2	2	22.6484
GFP	2	2	23.8526
GFP	2	2	48.591
GFP	2	2	33.9334
GFP	2	2	25.7974
GFP	2	2	33.6392
GFP	2	2	35.0013
GFP	2	2	55.1707
GFP	2	2	24.276
GFP	2	2	30.956
GFP	2	2	21.4859
GFP	2	2	55.3434
GFP	2	2	16.7132
GFP	2	2	12.0328
GFP	2	2	18.011
GFP	2	2	48.5833
GFP	2	2	25.5756
GFP	2	2	47.3201
GFP	2	2	25.5011
GFP	2	2	39.5557
GFP	2	2	25.9723
GFP	2	2	46.1096
GFP	2	2	33.8951
GFP	2	2	27.0904
GFP	2	2	40.1375
GFP	2	2	30.5438
GFP	2	2	27.4043
GFP	2	2	13.4077
GFP	2	2	33.5512
GFP	2	2	19.971
GFP	2	2	46.8311
GFP	2	2	33.6873
GFP	2	2	44.4587
GFP	2	2	34.9259
GFP	2	2	39.9341
GFP	2	2	26.4305
GFP	2	2	20.9712
GFP	2	2	29.5705
GFP	2	2	32.0908
GFP	2	2	52.142
GFP	2	2	19.9583
GFP	2	2	39.9923
GFP	2	2	25.1881
GFP	2	2	20.244
GFP	2	2	25.9477
GFP	2	2	30.8922
GFP	2	2	28.5417
GFP	2	2	25.0621
GFP	2	2	25.8855
GFP	2	2	45.244
GFP	2	2	26.9614
GFP	2	2	32.5949
GFP	2	2	31.1943
GFP	2	2	41.624
GFP	2	2	51.2194
GFP	2	2	36.644
GFP	2	2	34.626
GFP	2	2	17.3001
GFP	2	2	24.7122
GFP	2	2	35.9133
GFP	2	2	25.6382
GFP	2	2	31.6984
GFP	2	2	38.5184
GFP	2	2	39.3501
GFP	2	2	34.0801
GFP	2	2	30.6293
GFP	2	2	34.5026
GFP	2	2	47.2229
GFP	2	2	38.2559
GFP	2	2	49.8847
GFP	2	2	35.7704
GFP	2	2	48.7145
GFP	2	2	38.2749
GFP	2	2	44.9142
GFP	2	2	26.6597
GFP	2	2	34.3178
GFP	2	2	42.6328
GFP	2	2	33.8707
GFP	2	2	28.3693
GFP	2	2	37.6143
GFP	2	2	46.0982
GFP	2	2	43.894
GFP	2	2	28.6883
GFP	2	2	48.5392
GFP	2	2	66.9721
GFP	2	2	13.0047
GFP	2	2	101.647
GFP	2	2	26.3119
GFP	2	2	34.0737
GFP	2	2	41.8696
GFP	2	2	31.9104
GFP	2	2	23.1784
GFP	2	2	38.8532
GFP	2	2	21.3614
GFP	2	2	32.965
GFP	2	2	34.2036
GFP	2	2	18.5983
GFP	2	2	27.7927
GFP	2	2	19.5305
GFP	2	2	34.9685
GFP	2	2	27.047
GFP	2	2	23.3007
GFP	2	2	16.7098
GFP	2	2	24.6115
GFP	2	2	34.9633
GFP	2	2	28.5853
GFP	2	2	16.0533
GFP	2	2	25.8405
GFP	2	2	27.7868
GFP	2	2	27.8716
GFP	2	2	31.7837
GFP	2	2	23.6296
GFP	2	2	49.7563
GFP	2	2	31.6884
GFP	2	2	29.3172
GFP	2	2	27.7994
GFP	2	2	20.3425
GFP	2	2	43.5268
GFP	2	2	26.7123
GFP	2	2	21.9439
GFP	2	2	22.2182
GFP	2	2	41.1516
GFP	2	2	33.9113
GFP	2	2	28.8266
GFP	2	2	23.4121
GFP	2	2	30.2201
GFP	2	2	23.1795
GFP	2	2	24.9556
GFP	2	2	28.0204
GFP	2	2	36.1145
GFP	2	2	24.8531
GFP	2	2	34.6744
GFP	2	2	34.5929
GFP	2	2	39.1327
GFP	2	2	40.1154
GFP	2	2	30.3214
GFP	2	2	33.6584
GFP	2	2	28.5385
GFP	2	2	24.9825
GFP	2	2	44.815
GFP	2	2	28.5443
GFP	2	2	35.7415
GFP	2	2	23.5556
GFP	2	2	26.2715
GFP	2	2	15.4566
GFP	2	2	24.5353
GFP	2	2	39.9493
GFP	2	2	29.1842
GFP	2	2	23.9927
GFP	2	2	38.9631
GFP	2	2	28.7407
GFP	2	2	25.561
GFP	2	2	30.2109
GFP	2	2	26.1576
GFP	2	2	38.3042
GFP	2	2	23.171
GFP	2	2	26.7183
GFP	2	2	42.5034
GFP	2	2	27.3212
GFP	2	2	26.0585
GFP	2	2	29.4533
GFP	2	2	24.197
GFP	2	2	18.3612
GFP	2	2	35.6307
GFP	2	2	31.607
GFP	2	2	26.4214
GFP	2	2	21.9019
GFP	2	2	34.336
GFP	2	2	25.3621
GFP	2	2	35.4116
GFP	2	2	39.4715
GFP	2	2	28.8914
GFP	2	2	26.2456
GFP	2	2	24.4934
GFP	2	2	31.7107
GFP	2	2	46.1356
GFP	2	2	23.3954
GFP	2	2	33.7063
GFP	2	2	18.2042
GFP	2	2	28.4609
GFP	2	2	33.1539
GFP	2	2	19.3808
GFP	2	2	29.0778
GFP	2	3	434.48
GFP	2	3	51.6079
GFP	2	3	148.509
GFP	2	3	549.092
GFP	2	3	48.9624
GFP	2	3	54.5591
GFP	2	3	104.035
GFP	2	3	40.2714
GFP	2	3	94.0247
GFP	2	3	154.861
GFP	2	3	67.8
GFP	2	3	43.9031
GFP	2	3	74.0532
GFP	2	3	97.1633
GFP	2	3	83.7648
GFP	2	3	58.4076
GFP	2	3	99.8338
GFP	2	3	136.084
GFP	2	3	63.1212
GFP	2	3	126.162
GFP	2	3	81.2241
GFP	2	3	86.5658
GFP	2	3	30.5685
GFP	2	3	89.5213
GFP	2	3	133.566
GFP	2	3	178.179
GFP	2	3	164.772
GFP	2	3	72.8668
GFP	2	3	87.8511
GFP	2	3	67.3579
GFP	2	3	142.063
GFP	2	3	168.228
GFP	2	3	72.9287
GFP	2	3	182.492
GFP	2	3	36.5966
GFP	2	3	135.213
GFP	2	3	66.0798
GFP	2	3	61.8514
GFP	2	3	87.2914
GFP	2	3	103.302
GFP	2	3	52.2734
GFP	2	3	69.4004
GFP	2	3	57.7332
GFP	2	3	74.5577
GFP	2	3	56.783
GFP	2	3	51.6584
GFP	2	3	50.8916
GFP	2	3	56.6071
GFP	2	3	77.5251
GFP	2	3	90.0335
GFP	2	3	54.7275
GFP	2	3	73.154
GFP	2	3	147.923
GFP	2	3	69.2841
GFP	2	3	42.988
GFP	2	3	58.7516
GFP	2	3	128.086
GFP	2	3	61.5427
GFP	2	3	60.7893
GFP	2	3	50.05
GFP	2	3	87.6309
GFP	2	3	51.2324
GFP	2	3	136.513
GFP	2	3	60.0095
GFP	2	3	46.5815
GFP	2	3	85.0369
GFP	2	3	59.5621
GFP	2	3	34.3582
GFP	2	3	79.2265
GFP	2	3	48.6149
GFP	2	3	49.2501
GFP	2	3	60.4286
GFP	2	3	72.5813
GFP	2	3	41.5483
GFP	2	3	44.2591
GFP	2	3	41.2808
GFP	2	3	77.9742
GFP	2	3	46.2334
GFP	2	3	34.5037
GFP	2	3	58.583
GFP	2	3	56.2199
GFP	2	3	31.9319
GFP	2	3	64.2035
GFP	2	3	37.7239
GFP	2	3	56.7711
GFP	2	3	36.7106
GFP	2	3	40.207
GFP	2	3	41.4683
GFP	2	3	61.6163
GFP	2	3	74.7834
GFP	2	3	44.1447
GFP	2	3	80.5241
GFP	2	3	32.0943
GFP	2	3	61.0112
GFP	2	3	136.48
GFP	2	3	68.673
GFP	2	3	53.4592
GFP	2	3	67.1949
GFP	2	3	82.2021
GFP	2	3	114.933
GFP	2	3	89.6889
GFP	2	3	88.3805
GFP	2	3	45.4348
GFP	2	3	50.7549
GFP	2	3	69.2446
GFP	2	3	69.3677
GFP	2	3	68.5551
GFP	2	3	52.8472
GFP	2	3	66.595
GFP	2	3	41.3148
GFP	2	3	93.7781
GFP	2	3	65.7403
GFP	2	3	49.5724
GFP	2	3	47.7949
GFP	2	3	55.8924
GFP	2	3	158.215
GFP	2	3	43.3294
GFP	2	3	81.1747
GFP	2	3	67.8058
GFP	2	3	45.7134
GFP	2	3	40.3748
GFP	2	3	47.8058
GFP	2	3	61.0553
GFP	2	3	40.8329
GFP	2	3	48.239
GFP	2	3	51.0976
GFP	2	3	33.5846
GFP	2	3	54.4836
GFP	2	3	86.7207
GFP	2	3	52.269
GFP	2	3	39.1005
GFP	2	3	43.6047
GFP	2	3	32.8544
GFP	2	3	43.4365
GFP	2	3	69.1151
GFP	2	3	52.1661
GFP	2	3	81.1602
GFP	2	3	54.8482
GFP	2	3	56.5286
GFP	2	3	31.2279
GFP	2	3	68.7715
GFP	2	3	60.3271
GFP	2	3	57.7809
GFP	2	3	53.406
GFP	2	3	34.91
GFP	2	3	54.6194
GFP	2	3	44.9227
GFP	2	3	30.0121
PlAMV	2	1	196.198
PlAMV	2	1	240.371
PlAMV	2	1	221.408
PlAMV	2	1	213.312
PlAMV	2	1	180.679
PlAMV	2	1	200.945
PlAMV	2	1	232.627
PlAMV	2	1	43.3482
PlAMV	2	1	268.657
PlAMV	2	1	210.942
PlAMV	2	1	150.732
PlAMV	2	1	163.199
PlAMV	2	1	216.248
PlAMV	2	1	55.664
PlAMV	2	1	63.2082
PlAMV	2	1	126.37
PlAMV	2	1	189.452
PlAMV	2	1	45.6328
PlAMV	2	1	84.8124
PlAMV	2	1	61.8713
PlAMV	2	1	43.4383
PlAMV	2	1	94.6354
PlAMV	2	1	42.9045
PlAMV	2	1	210.958
PlAMV	2	1	36.2084
PlAMV	2	1	148.306
PlAMV	2	1	141.017
PlAMV	2	1	126.367
PlAMV	2	1	38.5449
PlAMV	2	1	28.4246
PlAMV	2	1	94.0955
PlAMV	2	1	60.8097
PlAMV	2	1	36.7824
PlAMV	2	1	89.2939
PlAMV	2	1	32.7747
PlAMV	2	1	75.9206
PlAMV	2	1	112.73
PlAMV	2	1	55.7319
PlAMV	2	1	70.7031
PlAMV	2	1	65.5236
PlAMV	2	1	57.3796
PlAMV	2	1	81.0954
PlAMV	2	1	59.4643
PlAMV	2	1	100.264
PlAMV	2	1	60.1727
PlAMV	2	1	45.8299
PlAMV	2	1	58.0463
PlAMV	2	1	69.344
PlAMV	2	1	62.0989
PlAMV	2	1	134.194
PlAMV	2	1	30.9067
PlAMV	2	1	86.1102
PlAMV	2	1	38.1766
PlAMV	2	1	59.4201
PlAMV	2	1	47.2267
PlAMV	2	1	70.1737
PlAMV	2	1	45.2172
PlAMV	2	1	22.3919
PlAMV	2	1	43.3269
PlAMV	2	1	31.4013
PlAMV	2	1	61.0586
PlAMV	2	1	50.1114
PlAMV	2	1	54.686
PlAMV	2	1	36.1481
PlAMV	2	1	106.401
PlAMV	2	1	74.9103
PlAMV	2	1	38.706
PlAMV	2	1	51.4331
PlAMV	2	1	36.3685
PlAMV	2	1	51.9931
PlAMV	2	1	146.71
PlAMV	2	1	29.458
PlAMV	2	1	39.5117
PlAMV	2	1	48.2221
PlAMV	2	1	65.9114
PlAMV	2	1	37.2884
PlAMV	2	1	51.7212
PlAMV	2	1	41.3915
PlAMV	2	1	42.0062
PlAMV	2	1	40.8783
PlAMV	2	1	48.888
PlAMV	2	1	45.153
PlAMV	2	1	35.5635
PlAMV	2	1	33.0194
PlAMV	2	1	31.2422
PlAMV	2	1	29.6759
PlAMV	2	1	33.1596
PlAMV	2	1	29.7919
PlAMV	2	1	34.2203
PlAMV	2	1	63.2296
PlAMV	2	1	54.7253
PlAMV	2	1	42.7358
PlAMV	2	1	64.0254
PlAMV	2	1	32.2484
PlAMV	2	1	74.3227
PlAMV	2	1	41.6202
PlAMV	2	2	52.3845
PlAMV	2	2	76.2742
PlAMV	2	2	174.942
PlAMV	2	2	117.082
PlAMV	2	2	99.5345
PlAMV	2	2	62.539
PlAMV	2	2	105.383
PlAMV	2	2	60.5158
PlAMV	2	2	73.2904
PlAMV	2	2	241.307
PlAMV	2	2	148.654
PlAMV	2	2	187.232
PlAMV	2	2	79.7225
PlAMV	2	2	118.646
PlAMV	2	2	53.5726
PlAMV	2	2	81.7116
PlAMV	2	2	44.8619
PlAMV	2	2	75.3932
PlAMV	2	2	115.94
PlAMV	2	2	110.905
PlAMV	2	2	100.063
PlAMV	2	2	61.5034
PlAMV	2	2	80.0515
PlAMV	2	2	60.6626
PlAMV	2	2	68.6049
PlAMV	2	2	114.573
PlAMV	2	2	86.9917
PlAMV	2	2	102.205
PlAMV	2	2	100.213
PlAMV	2	2	42.3937
PlAMV	2	2	80.9749
PlAMV	2	2	34.1023
PlAMV	2	2	80.2822
PlAMV	2	2	79.7464
PlAMV	2	2	46.2661
PlAMV	2	2	75.258
PlAMV	2	2	49.7454
PlAMV	2	2	51.813
PlAMV	2	2	60.6705
PlAMV	2	2	47.8346
PlAMV	2	2	74.2233
PlAMV	2	2	49.7795
PlAMV	2	2	93.7086
PlAMV	2	2	97.3317
PlAMV	2	2	85.7337
PlAMV	2	2	40.6697
PlAMV	2	2	115.534
PlAMV	2	2	54.7803
PlAMV	2	2	72.5569
PlAMV	2	2	48.1292
PlAMV	2	2	37.8706
PlAMV	2	2	71.3873
PlAMV	2	2	76.1336
PlAMV	2	2	52.4379
PlAMV	2	2	83.5969
PlAMV	2	2	51.0386
PlAMV	2	2	47.7103
PlAMV	2	2	39.302
PlAMV	2	2	38.613
PlAMV	2	2	64.0922
PlAMV	2	2	73.1015
PlAMV	2	2	68.7206
PlAMV	2	2	60.0126
PlAMV	2	2	47.9677
PlAMV	2	2	44.7712
PlAMV	2	2	70.4582
PlAMV	2	2	75.0075
PlAMV	2	2	44.5769
PlAMV	2	2	39.7538
PlAMV	2	2	79.5
PlAMV	2	2	67.0554
PlAMV	2	2	68.7216
PlAMV	2	2	58.2318
PlAMV	2	2	36.6343
PlAMV	2	2	80.2774
PlAMV	2	2	47.5026
PlAMV	2	2	50.0639
PlAMV	2	2	44.5536
PlAMV	2	2	55.9976
PlAMV	2	2	94.3119
PlAMV	2	2	54.3578
PlAMV	2	2	146.465
PlAMV	2	2	44.5756
PlAMV	2	2	214.951
PlAMV	2	2	58.4657
PlAMV	2	3	41.1122
PlAMV	2	3	116.579
PlAMV	2	3	152.951
PlAMV	2	3	97.7563
PlAMV	2	3	101.078
PlAMV	2	3	137.043
PlAMV	2	3	101.273
PlAMV	2	3	107.611
PlAMV	2	3	90.11
PlAMV	2	3	125.547
PlAMV	2	3	115.341
PlAMV	2	3	101.843
PlAMV	2	3	30.0604
PlAMV	2	3	78.3394
PlAMV	2	3	55.7233
PlAMV	2	3	75.7929
PlAMV	2	3	78.036
PlAMV	2	3	78.6018
PlAMV	2	3	71.4661
PlAMV	2	3	59.1867
PlAMV	2	3	60.1533
PlAMV	2	3	66.0892
PlAMV	2	3	62.6561
PlAMV	2	3	41.8639
PlAMV	2	3	340.46
PlAMV	2	3	217.082
PlAMV	2	3	59.6639
PlAMV	2	3	123.38
PlAMV	2	3	122.718
PlAMV	2	3	188.958
PlAMV	2	3	115.334
PlAMV	2	3	58.8953
PlAMV	2	3	80.4825
PlAMV	2	3	63.2149
PlAMV	2	3	153.861
PlAMV	2	3	43.9008
PlAMV	2	3	66.8685
PlAMV	2	3	58.2173
PlAMV	2	3	75.437
PlAMV	2	3	71.8026
PlAMV	2	3	77.9093
PlAMV	2	3	86.0246
PlAMV	2	3	95.2612
PlAMV	2	3	62.6204
PlAMV	2	3	76.0026
PlAMV	2	3	86.0251
PlAMV	2	3	57.5828
PlAMV	2	3	50.8936
PlAMV	2	3	61.4183
PlAMV	2	3	131.315
PlAMV	2	3	54.0009
PlAMV	2	3	75.6163
PlAMV	2	3	72.5358
PlAMV	2	3	59.4839
PlAMV	2	3	108.89
PlAMV	2	3	90.4526
PlAMV	2	3	54.8331
PlAMV	2	3	105.505
PlAMV	2	3	58.3078
PlAMV	2	3	47.9316
PlAMV	2	3	35.2601
PlAMV	2	3	46.1129
PlAMV	2	3	83.3688
PlAMV	2	3	104.488
PlAMV	2	3	70.9095
PlAMV	2	3	44.6607
PlAMV	2	3	202.362
PlAMV	2	3	67.0406
PlAMV	2	3	43.4512
PlAMV	2	3	40.2087
PlAMV	2	3	172.537
GFP	3	1	42.7784
GFP	3	1	91.0006
GFP	3	1	103.386
GFP	3	1	194.103
GFP	3	1	260.73
GFP	3	1	157.847
GFP	3	1	92.2297
GFP	3	1	141.682
GFP	3	1	52.0382
GFP	3	1	57.8558
GFP	3	1	86.2626
GFP	3	1	142.726
GFP	3	1	119.552
GFP	3	1	143.025
GFP	3	1	172.215
GFP	3	1	66.1616
GFP	3	1	230.634
GFP	3	1	73.9048
GFP	3	1	85.1761
GFP	3	1	180.797
GFP	3	1	124.936
GFP	3	1	93.4132
GFP	3	1	102.845
GFP	3	1	155.4
GFP	3	1	101.307
GFP	3	1	96.7761
GFP	3	1	240.963
GFP	3	1	80.1584
GFP	3	1	120.322
GFP	3	1	115.977
GFP	3	1	126.226
GFP	3	1	141.654
GFP	3	1	55.8817
GFP	3	1	97.7727
GFP	3	1	59.5224
GFP	3	1	75.0734
GFP	3	1	198.646
GFP	3	1	64.0916
GFP	3	1	58.0127
GFP	3	1	124.637
GFP	3	1	120.686
GFP	3	1	216.454
GFP	3	1	49.4472
GFP	3	1	115.966
GFP	3	1	49.4447
GFP	3	1	129.296
GFP	3	1	75.9382
GFP	3	1	141.727
GFP	3	1	72.2921
GFP	3	1	188.338
GFP	3	1	153.294
GFP	3	1	81.3869
GFP	3	1	191.405
GFP	3	1	65.7847
GFP	3	1	131.688
GFP	3	1	96.2768
GFP	3	1	53.4845
GFP	3	1	58.5768
GFP	3	1	97.111
GFP	3	1	103.897
GFP	3	1	99.327
GFP	3	1	106.024
GFP	3	1	50.7719
GFP	3	1	114.374
GFP	3	1	133.868
GFP	3	1	56.6486
GFP	3	1	130.017
GFP	3	1	123.268
GFP	3	1	75.9103
GFP	3	1	38.7942
GFP	3	1	76.0738
GFP	3	1	80.7604
GFP	3	1	76.0734
GFP	3	1	63.8064
GFP	3	1	104.347
GFP	3	1	50.7498
GFP	3	1	74.3297
GFP	3	1	84.8396
GFP	3	1	65.2791
GFP	3	1	46.6563
GFP	3	1	65.9722
GFP	3	1	84.0925
GFP	3	1	97.2323
GFP	3	1	82.7597
GFP	3	1	70.7649
GFP	3	1	122.831
GFP	3	1	67.5565
GFP	3	1	147.365
GFP	3	1	61.8724
GFP	3	1	76.4084
GFP	3	1	62.3604
GFP	3	1	83.2036
GFP	3	1	70.3055
GFP	3	1	43.9538
GFP	3	1	60.3893
GFP	3	1	73.8336
GFP	3	1	84.119
GFP	3	1	81.6593
GFP	3	1	120.197
GFP	3	1	111.881
GFP	3	1	82.2165
GFP	3	1	57.3174
GFP	3	1	82.9442
GFP	3	1	53.1379
GFP	3	1	60.93
GFP	3	1	59.9368
GFP	3	1	50.2064
GFP	3	1	55.077
GFP	3	1	155.872
GFP	3	1	78.2911
GFP	3	1	114.676
GFP	3	1	60.72
GFP	3	1	35.9428
GFP	3	1	52.4648
GFP	3	1	81.5954
GFP	3	1	42.4885
GFP	3	1	71.7556
GFP	3	1	91.0912
GFP	3	1	82.9762
GFP	3	1	70.8555
GFP	3	1	102.652
GFP	3	1	61.5978
GFP	3	1	59.0514
GFP	3	1	38.4173
GFP	3	1	23.7998
GFP	3	1	72.9178
GFP	3	1	55.5874
GFP	3	1	90.2576
GFP	3	1	72.4728
GFP	3	1	40.8794
GFP	3	1	47.521
GFP	3	1	58.4749
GFP	3	1	47.7093
GFP	3	1	64.3006
GFP	3	1	112.837
GFP	3	1	135.298
GFP	3	1	49.8507
GFP	3	1	48.7915
GFP	3	2	35.2586
GFP	3	2	29.2948
GFP	3	2	261.502
GFP	3	2	194.544
GFP	3	2	112.272
GFP	3	2	131.388
GFP	3	2	56.5787
GFP	3	2	92.6897
GFP	3	2	189.531
GFP	3	2	39.8017
GFP	3	2	139.633
GFP	3	2	93.8375
GFP	3	2	47.545
GFP	3	2	219.269
GFP	3	2	147.234
GFP	3	2	41.6935
GFP	3	2	59.9461
GFP	3	2	64.0446
GFP	3	2	33.3464
GFP	3	2	79.7689
GFP	3	2	48.4939
GFP	3	2	77.6232
GFP	3	2	54.4572
GFP	3	2	71.283
GFP	3	2	97.2247
GFP	3	2	86.8912
GFP	3	2	83.8445
GFP	3	2	61.6952
GFP	3	2	140.33
GFP	3	2	107.569
GFP	3	2	38.3883
GFP	3	2	49.9273
GFP	3	2	56.0848
GFP	3	2	58.4229
GFP	3	2	48.4327
GFP	3	2	61.3263
GFP	3	2	50.2067
GFP	3	2	148.838
GFP	3	2	74.9602
GFP	3	2	48.1459
GFP	3	2	74.6738
GFP	3	2	47.8615
GFP	3	2	67.0291
GFP	3	2	39.2299
GFP	3	2	41.7908
GFP	3	2	99.3403
GFP	3	2	67.0689
GFP	3	2	44.6435
GFP	3	2	69.2754
GFP	3	2	67.3925
GFP	3	2	48.3852
GFP	3	2	33.1438
GFP	3	2	89.3675
GFP	3	2	73.3121
GFP	3	2	25.8593
GFP	3	2	85.5778
GFP	3	2	33.1068
GFP	3	2	54.9532
GFP	3	2	59.5535
GFP	3	2	44.2955
GFP	3	2	82.0552
GFP	3	2	74.0887
GFP	3	2	52.1164
GFP	3	2	61.3323
GFP	3	2	52.6113
GFP	3	2	66.9289
GFP	3	2	54.681
GFP	3	2	51.5657
GFP	3	2	60.9226
GFP	3	2	65.7793
GFP	3	2	70.5088
GFP	3	2	74.955
GFP	3	2	34.9525
GFP	3	2	52.983
GFP	3	2	55.7512
GFP	3	2	80.639
GFP	3	2	64.5354
GFP	3	2	103.431
GFP	3	2	70.9304
GFP	3	2	76.2637
GFP	3	2	35.3784
GFP	3	2	59.6092
GFP	3	2	42.4276
GFP	3	2	49.4739
GFP	3	2	98.4227
GFP	3	2	40.306
GFP	3	2	67.6804
GFP	3	2	90.3417
GFP	3	2	40.733
GFP	3	2	26.4479
GFP	3	2	35.8429
GFP	3	2	54.2636
GFP	3	2	46.5141
GFP	3	2	40.7156
GFP	3	2	45.4291
GFP	3	2	52.1007
GFP	3	2	74.7167
GFP	3	2	44.3182
GFP	3	2	42.1759
GFP	3	2	28.4288
GFP	3	2	46.8241
GFP	3	2	23.8601
GFP	3	2	27.9242
GFP	3	2	42.4903
GFP	3	2	31.8387
GFP	3	2	40.2964
GFP	3	2	66.6015
GFP	3	2	58.0558
GFP	3	2	48.1038
GFP	3	2	88.8227
GFP	3	2	52.3979
GFP	3	2	133.289
GFP	3	2	51.0522
GFP	3	2	137.392
GFP	3	2	32.1493
GFP	3	3	245.363
GFP	3	3	112.533
GFP	3	3	165.937
GFP	3	3	193.614
GFP	3	3	215.944
GFP	3	3	108.801
GFP	3	3	80.3575
GFP	3	3	180.826
GFP	3	3	120.196
GFP	3	3	213.451
GFP	3	3	69.5953
GFP	3	3	69.3933
GFP	3	3	319.555
GFP	3	3	179.127
GFP	3	3	136.671
GFP	3	3	214.774
GFP	3	3	81.2692
GFP	3	3	226.744
GFP	3	3	98.9848
GFP	3	3	36.6704
GFP	3	3	186.403
GFP	3	3	151.75
GFP	3	3	118.2
GFP	3	3	57.5971
GFP	3	3	77.3301
GFP	3	3	66.7335
GFP	3	3	152.791
GFP	3	3	127.917
GFP	3	3	130.236
GFP	3	3	156.446
GFP	3	3	89.8942
GFP	3	3	195.367
GFP	3	3	72.885
GFP	3	3	77.9967
GFP	3	3	138.826
GFP	3	3	113.38
GFP	3	3	65.7158
GFP	3	3	108.162
GFP	3	3	122.458
GFP	3	3	93.0525
GFP	3	3	243.967
GFP	3	3	111.641
GFP	3	3	128.192
GFP	3	3	80.3624
GFP	3	3	148.211
GFP	3	3	49.986
GFP	3	3	54.4505
GFP	3	3	202.293
GFP	3	3	93.4053
GFP	3	3	80.2244
GFP	3	3	82.8404
GFP	3	3	93.3837
GFP	3	3	82.1937
GFP	3	3	63.4531
GFP	3	3	60.7418
GFP	3	3	101.91
GFP	3	3	76.376
GFP	3	3	130.194
GFP	3	3	153.671
GFP	3	3	76.0567
GFP	3	3	66.6222
GFP	3	3	41.6003
GFP	3	3	69.6678
GFP	3	3	49.0638
GFP	3	3	123.548
GFP	3	3	49.5955
GFP	3	3	87.8408
GFP	3	3	49.3925
GFP	3	3	59.5357
GFP	3	3	41.4045
GFP	3	3	62.6126
GFP	3	3	51.5546
GFP	3	3	175.726
GFP	3	3	61.0805
GFP	3	3	130.24
GFP	3	3	76.6835
GFP	3	3	42.4199
GFP	3	3	75.2895
GFP	3	3	64.5084
GFP	3	3	88.7688
GFP	3	3	43.7119
GFP	3	3	62.0813
GFP	3	3	52.1173
GFP	3	3	44.5633
GFP	3	3	59.1147
GFP	3	3	40.4969
GFP	3	3	60.1957
GFP	3	3	112.969
GFP	3	3	58.12
GFP	3	3	55.7427
GFP	3	3	90.4868
GFP	3	3	101.325
GFP	3	3	50.893
GFP	3	3	61.1928
GFP	3	3	58.4989
GFP	3	3	70.7838
GFP	3	3	131.627
GFP	3	3	49.5842
GFP	3	3	48.4781
GFP	3	3	51.4043
GFP	3	3	56.4039
GFP	3	3	42.6789
GFP	3	3	44.0314
GFP	3	3	53.469
GFP	3	3	30.0747
GFP	3	3	32.0499
GFP	3	3	43.0804
GFP	3	3	85.3883
GFP	3	3	53.6973
GFP	3	3	70.9021
GFP	3	3	67.9592
GFP	3	3	59.2279
GFP	3	3	95.1696
GFP	3	3	59.5147
GFP	3	3	63.5895
GFP	3	3	70.9895
GFP	3	3	59.8208
GFP	3	3	66.4274
GFP	3	3	69.1391
GFP	3	3	81.2408
GFP	3	3	81.5393
GFP	3	3	56.4152
GFP	3	3	54.1669
GFP	3	3	57.7235
GFP	3	3	88.9414
GFP	3	3	46.3877
GFP	3	3	39.5362
GFP	3	3	47.7098
GFP	3	3	76.9399
GFP	3	3	33.8891
GFP	3	3	57.9925
GFP	3	3	120.707
GFP	3	3	121.062
GFP	3	3	68.2291
GFP	3	3	55.9995
GFP	3	3	63.8088
GFP	3	3	46.0813
GFP	3	3	100.486
GFP	3	3	74.8248
GFP	3	3	79.2941
GFP	3	3	45.0826
GFP	3	3	48.4391
GFP	3	3	20.7421
GFP	3	3	65.4877
GFP	3	3	41.0891
GFP	3	3	54.1013
GFP	3	3	54.4566
GFP	3	3	61.894
GFP	3	3	41.0851
GFP	3	3	40.602
GFP	3	3	69.6272
GFP	3	3	41.3339
GFP	3	3	75.5839
GFP	3	3	48.0568
GFP	3	3	103.827
GFP	3	3	67.2932
GFP	3	3	59.136
GFP	3	3	59.8242
GFP	3	3	80.9675
GFP	3	4	122.706
GFP	3	4	101.248
GFP	3	4	165.052
GFP	3	4	238.71
GFP	3	4	119.127
GFP	3	4	50.7875
GFP	3	4	73.1635
GFP	3	4	76.1428
GFP	3	4	75.4038
GFP	3	4	44.1028
GFP	3	4	51.2084
GFP	3	4	79.003
GFP	3	4	150.068
GFP	3	4	77.3564
GFP	3	4	85.4774
GFP	3	4	105.831
GFP	3	4	146.488
GFP	3	4	100.768
GFP	3	4	62.4543
GFP	3	4	103.516
GFP	3	4	91.1201
GFP	3	4	79.2271
GFP	3	4	37.5
GFP	3	4	37.6332
GFP	3	4	152.305
GFP	3	4	48.9549
GFP	3	4	74.7981
GFP	3	4	58.4833
GFP	3	4	142.864
GFP	3	4	48.2582
GFP	3	4	28.9866
GFP	3	4	57.1676
GFP	3	4	91.8241
GFP	3	4	78.1347
GFP	3	4	72.1975
GFP	3	4	54.4158
GFP	3	4	80.5022
GFP	3	4	114.143
GFP	3	4	85.9659
GFP	3	4	71.0667
GFP	3	4	69.302
GFP	3	4	34.286
GFP	3	4	155.185
GFP	3	4	96.8276
GFP	3	4	74.9909
GFP	3	4	61.5218
GFP	3	4	55.7772
GFP	3	4	100.049
GFP	3	4	132.721
GFP	3	4	60.3291
GFP	3	4	66.1639
GFP	3	4	69.3502
GFP	3	4	77.6984
GFP	3	4	120.956
GFP	3	4	153.444
GFP	3	4	40.8843
GFP	3	4	51.2079
GFP	3	4	119.638
GFP	3	4	62.7625
GFP	3	4	65.1772
GFP	3	4	45.5558
GFP	3	4	47.309
GFP	3	4	95.6058
GFP	3	4	63.5931
GFP	3	4	67.2558
GFP	3	4	48.5823
GFP	3	4	104.19
GFP	3	4	93.0978
GFP	3	4	60.7844
GFP	3	4	76.1213
GFP	3	4	54.2793
GFP	3	4	51.054
GFP	3	4	48.5982
GFP	3	4	70.4134
GFP	3	4	51.8749
GFP	3	4	65.14
GFP	3	4	73.7385
GFP	3	4	56.1464
GFP	3	4	48.9703
GFP	3	4	62.5711
GFP	3	4	75.7649
GFP	3	4	35.5358
GFP	3	4	53.6165
GFP	3	4	55.896
GFP	3	4	35.6586
GFP	3	4	78.9988
GFP	3	4	47.9816
GFP	3	4	82.375
GFP	3	4	77.7415
GFP	3	4	68.8313
GFP	3	4	42.782
GFP	3	4	119.737
GFP	3	4	76.7135
GFP	3	4	87.9879
GFP	3	4	61.5915
GFP	3	4	83.7518
GFP	3	4	42.1657
GFP	3	4	36.8095
GFP	3	4	64.0628
GFP	3	4	54.261
GFP	3	4	68.6596
GFP	3	4	61.827
GFP	3	4	31.3388
GFP	3	4	65.9792
GFP	3	4	69.6798
GFP	3	4	90.157
GFP	3	4	40.5398
GFP	3	4	97.9202
GFP	3	4	63.7072
GFP	3	4	51.1994
GFP	3	4	56.4114
GFP	3	4	59.1129
GFP	3	4	43.9653
GFP	3	4	44.5291
GFP	3	4	47.207
GFP	3	4	44.3854
GFP	3	4	56.7245
GFP	3	4	36.07
GFP	3	4	37.7717
GFP	3	4	70.3982
GFP	3	4	45.0875
GFP	3	4	40.9563
GFP	3	4	47.6908
GFP	3	4	30.9237
PlAMV	3	1	108.55
PlAMV	3	1	82.729
PlAMV	3	1	57.2567
PlAMV	3	1	71.9137
PlAMV	3	1	37.4757
PlAMV	3	1	77.7038
PlAMV	3	1	83.9813
PlAMV	3	1	90.347
PlAMV	3	1	30.2733
PlAMV	3	1	41.6479
PlAMV	3	1	50.1637
PlAMV	3	1	54.2248
PlAMV	3	1	34.3082
PlAMV	3	1	48.9438
PlAMV	3	1	26.5118
PlAMV	3	1	72.9798
PlAMV	3	1	35.9043
PlAMV	3	1	34.7157
PlAMV	3	1	41.2364
PlAMV	3	1	45.451
PlAMV	3	1	41.4
PlAMV	3	1	27.6509
PlAMV	3	1	144.678
PlAMV	3	1	44.4225
PlAMV	3	1	15.4269
PlAMV	3	1	53.6154
PlAMV	3	1	55.5407
PlAMV	3	1	32.7608
PlAMV	3	1	40.9144
PlAMV	3	1	37.3916
PlAMV	3	1	35.679
PlAMV	3	1	55.4156
PlAMV	3	1	38.5969
PlAMV	3	1	109.73
PlAMV	3	1	55.9442
PlAMV	3	1	91.8931
PlAMV	3	1	42.1151
PlAMV	3	1	32.9004
PlAMV	3	1	53.871
PlAMV	3	1	46.3371
PlAMV	3	1	33.0369
PlAMV	3	1	28.6304
PlAMV	3	1	97.8338
PlAMV	3	1	79.4417
PlAMV	3	1	58.2939
PlAMV	3	1	93.3632
PlAMV	3	1	51.4679
PlAMV	3	1	140.807
PlAMV	3	1	61.9494
PlAMV	3	1	37.1962
PlAMV	3	1	67.7141
PlAMV	3	1	58.303
PlAMV	3	1	36.2854
PlAMV	3	1	17.6807
PlAMV	3	1	163.232
PlAMV	3	1	57.1902
PlAMV	3	1	38.749
PlAMV	3	1	71.1695
PlAMV	3	1	67.0315
PlAMV	3	1	44.2539
PlAMV	3	2	261.223
PlAMV	3	2	183.95
PlAMV	3	2	297.046
PlAMV	3	2	46.0652
PlAMV	3	2	215.047
PlAMV	3	2	222.088
PlAMV	3	2	84.729
PlAMV	3	2	388.198
PlAMV	3	2	213.142
PlAMV	3	2	92.2047
PlAMV	3	2	78.5728
PlAMV	3	2	101.852
PlAMV	3	2	217.899
PlAMV	3	2	171.398
PlAMV	3	2	204.409
PlAMV	3	2	92.1436
PlAMV	3	2	250.77
PlAMV	3	2	147.602
PlAMV	3	2	84.5742
PlAMV	3	2	199.267
PlAMV	3	2	263.951
PlAMV	3	2	51.0745
PlAMV	3	2	61.8846
PlAMV	3	2	123.279
PlAMV	3	2	91.0632
PlAMV	3	2	249.346
PlAMV	3	2	84.7926
PlAMV	3	2	52.3889
PlAMV	3	2	126.873
PlAMV	3	2	112.294
PlAMV	3	2	211.119
PlAMV	3	2	127.373
PlAMV	3	2	45.5802
PlAMV	3	2	60.8332
PlAMV	3	2	83.4292
PlAMV	3	2	180.594
PlAMV	3	2	58.8133
PlAMV	3	2	165.884
PlAMV	3	2	65.4573
PlAMV	3	2	126.536
PlAMV	3	2	74.3538
PlAMV	3	2	183.56
PlAMV	3	2	200.663
PlAMV	3	2	115.183
PlAMV	3	2	85.6096
PlAMV	3	2	166.76
PlAMV	3	2	174.807
PlAMV	3	2	112.056
PlAMV	3	2	107.894
PlAMV	3	2	91.3916
PlAMV	3	2	88.6587
PlAMV	3	2	50.1564
PlAMV	3	2	93.453
PlAMV	3	2	57.1209
[truncated: 299 more rows]
