# Supplementary material for: Interdependence of plasma membrane nanoscale dynamics of a kinase and its cognate substrate underlies Arabidopsis response to viral infection
Source: eLife. 2025 May 2;12:RP90309. doi: 10.7554/eLife.90309 (PMC12048157; doi:10.7554/eLife.90309)
Supplement: Figure 2—source data 6. [file elife-90309-fig2-data6.xlsx]

## Sheet: Feuil1
Non-linear fit of the values presented in "source data Figure 2I"
Gaussian
Best-fit values	exp1_GFP_cell1	exp1_GFP_cell2	exp1_GFP_cell3	exp2_GFP_cell1	exp2_GFP_cell2	exp2_GFP_cell3	exp3_GFP_cell1	exp3_GFP_cell2	exp3_GFP_cell3	exp3_GFP_cell4	exp1_PlAMV_cell1	exp1_PlAMV_cell2	exp1_PlAMV_cell3	exp2_PlAMV_cell1	exp2_PlAMV_cell2	exp2_PlAMV_cell3	exp3_PlAMV_cell1	exp3_PlAMV_cell2	exp3_PlAMV_cell3	exp3_PlAMV_cell4
Amplitude	20.82	27.27	16.68	51.43	235.2	58.78	31.69	38.57	48.73	39.43	8.332	19.41	11.39	35.66	25.04	18.61	23.58	32.86	20.34	17.55
Mean	140.3	111.5	117.6	43.63	33.54	56.69	77.62	54.07	61.09	61.59	114.8	95.39	95.89	47.21	64.54	72.33	46.65	72.61	97.66	82.55
SD	47.98	34.11	29.4	15.83	14.73	17.68	32.09	21.55	20.36	23.25	42.15	42.35	43.89	15.57	25.74	27.91	17.29	30.09	34.96	36.78
95% CI (profile likelihood)
Amplitude	14,13 to 28,17	22,80 to 32,67	12,28 to ???	46,13 to 56,75	224,6 to 246,2	53,51 to 64,16	25,69 to 38,27	32,54 to 44,93	38,75 to 59,15	33,43 to 45,71	6,391 to 10,40	16,02 to 23,07	8,489 to 14,61	28,46 to 45,45	20,72 to 29,56	16,05 to 21,28	18,67 to 29,03	26,40 to 39,82	16,68 to 24,25	9,974 to 25,67
Mean	121,7 to 162,0	104,4 to 118,0	108,0 to ???	41,81 to 45,48	32,84 to 34,25	54,79 to 58,64	70,63 to 85,50	50,14 to 58,24	56,41 to 66,46	57,44 to 66,03	103,3 to 127,2	87,36 to 104,1	83,69 to 111,2	43,85 to 51,14	59,26 to 70,11	67,81 to 77,10	42,99 to 51,32	66,01 to 80,10	90,89 to 105,3	64,58 to 111,6
SD	31,26 to 75,17	26,37 to 42,00	??? to 41,77	13,92 to 18,30	13,84 to 15,66	15,98 to 19,61	24,56 to 41,90	17,73 to 26,46	15,85 to 27,35	19,31 to 28,30	31,94 to 57,86	33,10 to 55,11	30,56 to 66,52	10,76 to 20,79	21,09 to 32,07	23,61 to 33,22	12,60 to 24,33	23,02 to 40,29	27,31 to 45,52	19,75 to 96,85
Goodness of Fit
Degrees of Freedom	6	6	6	24	24	24	13	13	13	13	13	13	13	14	14	14	16	16	16	16
R squared	0.869	0.9721	0.9463	0.96	0.9929	0.964	0.9035	0.9401	0.8972	0.9423	0.8122	0.9027	0.8005	0.9056	0.9179	0.9441	0.9103	0.8755	0.8937	0.6392
Sum of Squares	54.8	16.56	10.49	132.4	454.3	172.1	177.6	128.2	309.8	137.1	26.66	69.17	51.37	125.7	89.86	33.13	65.17	238.4	84.69	280.2
Sy.x	3.022	1.661	1.322	2.349	4.351	2.678	3.696	3.141	4.882	3.247	1.432	2.307	1.988	2.996	2.534	1.538	2.018	3.86	2.301	4.185
Constraints
SD	SD > 0	SD > 0	SD > 0	SD > 0	SD > 0	SD > 0	SD > 0	SD > 0	SD > 0	SD > 0	SD > 0	SD > 0	SD > 0	SD > 0	SD > 0	SD > 0	SD > 0	SD > 0	SD > 0	SD > 0
Number of points
# of X values	9	9	9	27	27	27	16	16	16	16	16	16	16	17	17	17	19	19	19	19
# Y values analyzed	9	9	9	27	27	27	16	16	16	16	16	16	16	17	17	17	19	19	19	19
Peak value (Mean from Gaussian fit)			Statistical analysis
GFP	PlAMV		Column B	PlAMV
140.3	114.8		vs.	vs,
111.5	95.39		Column A	GFP
117.6	95.89		Mann Whitney test
43.63	47.21		P value	0.5787
33.54	64.54		Exact or approximate P value?	Exact
56.69	72.33		P value summary	ns
77.62	46.65		Significantly different (P < 0.05)?	No
54.07	72.61		One- or two-tailed P value?	Two-tailed
61.09	97.66		Sum of ranks in column A,B	97 , 113
61.59	82.55		Mann-Whitney U	42
			Difference between medians
			Median of column A	61,34, n=10
			Median of column B	77,58, n=10
			Difference: Actual	16.24
			Difference: Hodges-Lehmann	10.61
