# Supplementary material for: Interdependence of plasma membrane nanoscale dynamics of a kinase and its cognate substrate underlies Arabidopsis response to viral infection
Source: eLife. 2025 May 2;12:RP90309. doi: 10.7554/eLife.90309 (PMC12048157; doi:10.7554/eLife.90309)
Supplement: Figure 2—source data 7. [file elife-90309-fig2-data7.xlsx]

## Sheet: Feuil1
% of CPK3 proteins found in ND			Statistical analysis
Condition	Proteins in ND (%)		Column B	PlAMV
GFP	10.828		vs.	vs,
GFP	3.85051		Column A	GFP
GFP	6.333
GFP	9.21989		Mann Whitney test
GFP	4.06628		P value	0.6412
GFP	4.51347		Exact or approximate P value?	Exact
GFP	4.47936		P value summary	ns
GFP	7.90964		Significantly different (P < 0.05)?	No
GFP	5.2282		One- or two-tailed P value?	Two-tailed
GFP	6.53745		Sum of ranks in column A,B	114 , 117
GFP	4.51821		Mann-Whitney U	48
PlAMV	4.01995
PlAMV	6.85601		Difference between medians
PlAMV	5.49733		Median of column A	5,228, n=11
PlAMV	4.01995		Median of column B	6,177, n=10
PlAMV	6.85601		Difference: Actual	0.9485
PlAMV	5.49733		Difference: Hodges-Lehmann	0.4208
PlAMV	1.63331
PlAMV	10.6445
PlAMV	11.1396
PlAMV	12.5182
