# Supplementary material for: Interdependence of plasma membrane nanoscale dynamics of a kinase and its cognate substrate underlies Arabidopsis response to viral infection
Source: eLife. 2025 May 2;12:RP90309. doi: 10.7554/eLife.90309 (PMC12048157; doi:10.7554/eLife.90309)
Supplement: Figure 3—source data 1. [file elife-90309-fig3-data1.xlsx]

## Sheet: Feuil1
Condition	Experiment	Cell	log(D)
CPK3FL	1	1	-0.98426
CPK3FL	1	1	-0.882069
CPK3FL	1	1	-0.869134
CPK3FL	1	1	-5
CPK3FL	1	1	-1.10208
CPK3FL	1	1	-0.140232
CPK3FL	1	1	0.244534
CPK3FL	1	1	-0.168711
CPK3FL	1	1	-0.791298
CPK3FL	1	1	-0.416141
CPK3FL	1	1	-0.674792
CPK3FL	1	1	-0.415597
CPK3FL	1	1	-0.741302
CPK3FL	1	1	0.0623642
CPK3FL	1	1	-1.51326
CPK3FL	1	1	-1.87775
CPK3FL	1	1	-0.377726
CPK3FL	1	1	-0.314144
CPK3FL	1	1	-1.97187
CPK3FL	1	1	-0.563195
CPK3FL	1	1	0.0779402
CPK3FL	1	1	0.0396061
CPK3FL	1	1	0.0537891
CPK3FL	1	1	-1.36825
CPK3FL	1	1	-5
CPK3FL	1	1	-5
CPK3FL	1	1	-0.213329
CPK3FL	1	1	-0.192837
CPK3FL	1	1	-2.3579
CPK3FL	1	1	-5
CPK3FL	1	1	-5
CPK3FL	1	1	-5
CPK3FL	1	1	-5
CPK3FL	1	1	-1.90186
CPK3FL	1	1	-0.776497
CPK3FL	1	1	-0.399664
CPK3FL	1	1	-0.442852
CPK3FL	1	1	-0.162734
CPK3FL	1	1	-1.9667
CPK3FL	1	1	-5
CPK3FL	1	1	-2.18746
CPK3FL	1	1	-0.683483
CPK3FL	1	1	-5
CPK3FL	1	1	-5
CPK3FL	1	1	-1.97836
CPK3FL	1	1	-5
CPK3FL	1	1	-1.40733
CPK3FL	1	1	0.252134
CPK3FL	1	1	0.0561251
CPK3FL	1	1	0.0627441
CPK3FL	1	1	0.0699699
CPK3FL	1	1	0.065135
CPK3FL	1	1	0.141067
CPK3FL	1	1	0.00406092
CPK3FL	1	1	0.00742805
CPK3FL	1	1	0.0324141
CPK3FL	1	1	0.016459
CPK3FL	1	1	-0.120664
CPK3FL	1	1	-0.453972
CPK3FL	1	1	-0.456545
CPK3FL	1	1	-1.1092
CPK3FL	1	1	-0.861819
CPK3FL	1	1	-0.793432
CPK3FL	1	1	-0.432802
CPK3FL	1	1	-0.345018
CPK3FL	1	1	-0.391119
CPK3FL	1	1	-1.06993
CPK3FL	1	1	-0.428925
CPK3FL	1	1	-0.438947
CPK3FL	1	1	-0.345238
CPK3FL	1	1	-0.393167
CPK3FL	1	1	-0.399445
CPK3FL	1	1	-0.622057
CPK3FL	1	1	0.000656564
CPK3FL	1	1	0.0647869
CPK3FL	1	1	0.0187614
CPK3FL	1	1	-1.19687
CPK3FL	1	1	-0.11297
CPK3FL	1	1	-0.0845861
CPK3FL	1	1	-0.0774839
CPK3FL	1	1	-0.343539
CPK3FL	1	1	0.238614
CPK3FL	1	1	-1.24396
CPK3FL	1	1	-0.280111
CPK3FL	1	1	-0.237895
CPK3FL	1	1	-0.28911
CPK3FL	1	1	-0.701037
CPK3FL	1	1	-0.340783
CPK3FL	1	1	-0.249703
CPK3FL	1	1	-0.0559404
CPK3FL	1	1	-0.0463025
CPK3FL	1	1	-0.117999
CPK3FL	1	1	-0.163856
CPK3FL	1	1	-0.325009
CPK3FL	1	1	-5
CPK3FL	1	1	-0.214461
CPK3FL	1	1	-0.208458
CPK3FL	1	1	-0.356453
CPK3FL	1	1	-0.18017
CPK3FL	1	1	-0.34142
CPK3FL	1	1	-0.311041
CPK3FL	1	1	-0.331965
CPK3FL	1	1	-5
CPK3FL	1	1	-0.685085
CPK3FL	1	1	-0.857559
CPK3FL	1	1	-5
CPK3FL	1	1	-0.0851366
CPK3FL	1	1	-0.318277
CPK3FL	1	1	-0.329786
CPK3FL	1	1	-0.225554
CPK3FL	1	1	-0.763695
CPK3FL	1	1	-0.717929
CPK3FL	1	1	-1.04603
CPK3FL	1	1	-0.724023
CPK3FL	1	1	-0.483225
CPK3FL	1	1	-0.894533
CPK3FL	1	1	-0.522046
CPK3FL	1	1	-0.214241
CPK3FL	1	1	-0.193377
CPK3FL	1	1	-1.97748
CPK3FL	1	1	-5
CPK3FL	1	1	0.0643066
CPK3FL	1	1	-4.36972
CPK3FL	1	1	-5
CPK3FL	1	1	-5
CPK3FL	1	1	-5
CPK3FL	1	1	-5
CPK3FL	1	1	-3.63633
CPK3FL	1	1	-5
CPK3FL	1	1	-5
CPK3FL	1	1	-0.881192
CPK3FL	1	1	0.195158
CPK3FL	1	1	0.198598
CPK3FL	1	1	0.170246
CPK3FL	1	1	0.22012
CPK3FL	1	1	-1.38071
CPK3FL	1	1	-0.0717669
CPK3FL	1	1	-2.83943
CPK3FL	1	1	-0.105422
CPK3FL	1	1	-0.135029
CPK3FL	1	1	-0.164869
CPK3FL	1	1	-0.0933035
CPK3FL	1	1	-0.11148
CPK3FL	1	1	-3.03901
CPK3FL	1	1	-0.3659
CPK3FL	1	1	-1.37535
CPK3FL	1	1	-5
CPK3FL	1	1	-1.11509
CPK3FL	1	1	-5
CPK3FL	1	1	-0.773533
CPK3FL	1	1	-0.613318
CPK3FL	1	1	-0.55889
CPK3FL	1	1	-0.268824
CPK3FL	1	1	-0.234373
CPK3FL	1	1	-2.27348
CPK3FL	1	1	-5
CPK3FL	1	1	-5
CPK3FL	1	1	-1.87815
CPK3FL	1	1	-1.59577
CPK3FL	1	1	-1.11379
CPK3FL	1	1	-5
CPK3FL	1	1	0.0749569
CPK3FL	1	1	-0.0240717
CPK3FL	1	1	0.0410145
CPK3FL	1	1	0.0996569
CPK3FL	1	1	0.10759
CPK3FL	1	1	-0.500802
CPK3FL	1	1	-2.27679
CPK3FL	1	1	-0.43905
CPK3FL	1	1	-0.643854
CPK3FL	1	1	-0.422793
CPK3FL	1	1	-1.02598
CPK3FL	1	1	-0.192178
CPK3FL	1	1	-0.0107025
CPK3FL	1	1	-2.73702
CPK3FL	1	1	-0.26562
CPK3FL	1	1	-0.915772
CPK3FL	1	1	-1.46447
CPK3FL	1	1	0.350726
CPK3FL	1	1	-1.22288
CPK3FL	1	1	-1.02475
CPK3FL	1	1	-5
CPK3FL	1	1	-5
CPK3FL	1	1	-5
CPK3FL	1	1	-0.680661
CPK3FL	1	1	-1.99532
CPK3FL	1	1	-0.52598
CPK3FL	1	1	-2.44174
CPK3FL	1	1	-1.62298
CPK3FL	1	1	-0.577416
CPK3FL	1	1	-0.0977285
CPK3FL	1	1	-3.63585
CPK3FL	1	1	-5
CPK3FL	1	1	-0.822552
CPK3FL	1	1	-0.75036
CPK3FL	1	1	-5
CPK3FL	1	1	-0.889613
CPK3FL	1	1	-5
CPK3FL	1	1	0.135253
CPK3FL	1	1	0.0857355
CPK3FL	1	1	0.133729
CPK3FL	1	1	0.117153
CPK3FL	1	1	0.071345
CPK3FL	1	1	-1.56919
CPK3FL	1	1	-1.23013
CPK3FL	1	1	-5
CPK3FL	1	1	-5
CPK3FL	1	1	-5
CPK3FL	1	1	-0.0469391
CPK3FL	1	1	-0.0136711
CPK3FL	1	1	-0.379012
CPK3FL	1	1	-2.3104
CPK3FL	1	1	0.352037
CPK3FL	1	1	0.366141
CPK3FL	1	1	-5
CPK3FL	1	1	-5
CPK3FL	1	1	-1.37714
CPK3FL	1	1	-1.04479
CPK3FL	1	1	-0.0469633
CPK3FL	1	1	-0.407037
CPK3FL	1	1	-0.203782
CPK3FL	1	1	-0.179245
CPK3FL	1	1	-0.224978
CPK3FL	1	1	-5
CPK3FL	1	1	-1.13821
CPK3FL	1	1	-1.31956
CPK3FL	1	1	-1.16881
CPK3FL	1	1	-1.10573
CPK3FL	1	1	-0.635714
CPK3FL	1	1	-0.618586
CPK3FL	1	1	-2.31701
CPK3FL	1	1	-5
CPK3FL	1	1	-0.86162
CPK3FL	1	1	-0.540671
CPK3FL	1	1	-0.396042
CPK3FL	1	1	-0.660747
CPK3FL	1	1	-0.932415
CPK3FL	1	1	-0.638719
CPK3FL	1	1	-1.68686
CPK3FL	1	1	-0.28028
CPK3FL	1	1	-0.136178
CPK3FL	1	1	0.503141
CPK3FL	1	1	0.501822
CPK3FL	1	1	0.500795
CPK3FL	1	1	0.501427
CPK3FL	1	1	-5
CPK3FL	1	1	-1.91328
CPK3FL	1	1	-0.491738
CPK3FL	1	1	-0.998188
CPK3FL	1	1	-0.287072
CPK3FL	1	1	-0.271378
CPK3FL	1	1	-0.44183
CPK3FL	1	1	-0.393359
CPK3FL	1	1	-0.23282
CPK3FL	1	1	-0.746689
CPK3FL	1	1	-0.914004
CPK3FL	1	1	-0.806016
CPK3FL	1	1	0.307248
CPK3FL	1	1	0.269531
CPK3FL	1	1	-0.593671
CPK3FL	1	1	0.0440273
CPK3FL	1	1	0.495226
CPK3FL	1	1	-0.0843356
CPK3FL	1	1	-0.399026
CPK3FL	1	1	-0.170265
CPK3FL	1	1	-1.19881
CPK3FL	1	1	-5
CPK3FL	1	1	-5
CPK3FL	1	1	-0.939711
CPK3FL	1	1	-5
CPK3FL	1	1	-5
CPK3FL	1	1	0.46888
CPK3FL	1	1	0.43148
CPK3FL	1	1	-1.15279
CPK3FL	1	1	-0.160403
CPK3FL	1	1	-0.231996
CPK3FL	1	1	-0.158975
CPK3FL	1	1	0.469122
CPK3FL	1	1	-0.525401
CPK3FL	1	1	-0.34533
CPK3FL	1	1	-1.79035
CPK3FL	1	1	-5
CPK3FL	1	1	-0.628982
CPK3FL	1	1	-2.22944
CPK3FL	1	1	0.267583
CPK3FL	1	1	-0.0719967
CPK3FL	1	1	0.0023149
CPK3FL	1	1	-0.399154
CPK3FL	1	1	-0.867287
CPK3FL	1	1	-1.00212
CPK3FL	1	1	-1.23962
CPK3FL	1	1	-5
CPK3FL	1	1	-4.02479
CPK3FL	1	1	-2.13334
CPK3FL	1	1	-5
CPK3FL	1	1	-5
CPK3FL	1	1	-5
CPK3FL	1	1	-2.42907
CPK3FL	1	1	-0.586943
CPK3FL	1	1	-0.30518
CPK3FL	1	1	-5
CPK3FL	1	1	-0.481051
CPK3FL	1	1	-0.417489
CPK3FL	1	1	-1.17326
CPK3FL	1	1	-0.870414
CPK3FL	1	1	-5
CPK3FL	1	1	-1.26856
CPK3FL	1	1	-0.134877
CPK3FL	1	1	-0.17486
CPK3FL	1	1	-5
CPK3FL	1	1	-0.296547
CPK3FL	1	1	-0.329014
CPK3FL	1	1	-0.306138
CPK3FL	1	1	-5
CPK3FL	1	1	-5
CPK3FL	1	1	-5
CPK3FL	1	1	-5
CPK3FL	1	1	-1.75992
CPK3FL	1	1	0.443335
CPK3FL	1	1	0.443671
CPK3FL	1	1	0.452192
CPK3FL	1	1	0.445513
CPK3FL	1	1	0.469045
CPK3FL	1	1	0.436791
CPK3FL	1	1	0.392513
CPK3FL	1	1	0.459871
CPK3FL	1	1	-5
CPK3FL	1	1	-5
CPK3FL	1	1	-5
CPK3FL	1	1	-5
CPK3FL	1	1	-0.793126
CPK3FL	1	1	-1.47093
CPK3FL	1	1	0.199099
CPK3FL	1	1	-0.304764
CPK3FL	1	1	0.246414
CPK3FL	1	1	0.253363
CPK3FL	1	1	0.285291
CPK3FL	1	1	0.184035
CPK3FL	1	1	0.27932
CPK3FL	1	1	-0.172777
CPK3FL	1	1	-0.586892
CPK3FL	1	1	-0.363765
CPK3FL	1	1	-0.729279
CPK3FL	1	1	-0.13038
CPK3FL	1	1	0.0199544
CPK3FL	1	1	0.00542233
CPK3FL	1	1	0.167437
CPK3FL	1	1	0.161557
CPK3FL	1	1	0.190026
CPK3FL	1	1	0.139736
CPK3FL	1	1	0.189761
CPK3FL	1	1	0.153017
CPK3FL	1	1	0.13309
CPK3FL	1	1	0.207498
CPK3FL	1	1	0.0358772
CPK3FL	1	1	-0.0626448
CPK3FL	1	1	0.0277895
CPK3FL	1	1	0.0203533
CPK3FL	1	1	-0.0831138
CPK3FL	1	1	-5
CPK3FL	1	1	0.177983
CPK3FL	1	1	0.138197
CPK3FL	1	1	0.211464
CPK3FL	1	1	-0.742005
CPK3FL	1	1	-0.634084
CPK3FL	1	1	-0.20863
CPK3FL	1	1	-0.0111336
CPK3FL	1	1	-0.23678
CPK3FL	1	1	-0.294165
CPK3FL	1	1	-0.597665
CPK3FL	1	1	-1.58024
CPK3FL	1	1	-0.322764
CPK3FL	1	1	-0.850974
CPK3FL	1	1	0.133982
CPK3FL	1	1	0.114956
CPK3FL	1	1	-1.86817
CPK3FL	1	1	-0.498492
CPK3FL	1	1	-0.42794
CPK3FL	1	1	-1.48702
CPK3FL	1	1	-0.775645
CPK3FL	1	1	-0.569495
CPK3FL	1	1	-0.785151
CPK3FL	1	1	-2.08302
CPK3FL	1	1	-1.30998
CPK3FL	1	1	-0.0404047
CPK3FL	1	1	0.116579
CPK3FL	1	1	0.192153
CPK3FL	1	1	0.160434
CPK3FL	1	1	-0.300153
CPK3FL	1	1	-0.320612
CPK3FL	1	1	-0.0562526
CPK3FL	1	1	-0.363986
CPK3FL	1	1	-0.530417
CPK3FL	1	1	-0.620718
CPK3FL	1	1	0.145315
CPK3FL	1	1	-1.1726
CPK3FL	1	1	0.181162
CPK3FL	1	1	0.136886
CPK3FL	1	1	0.094699
CPK3FL	1	1	-1.30346
CPK3FL	1	1	-5
CPK3FL	1	1	-5
CPK3FL	1	1	-0.218909
CPK3FL	1	1	-0.137049
CPK3FL	1	1	-0.382317
CPK3FL	1	1	-0.394846
CPK3FL	1	1	-0.25635
CPK3FL	1	1	-0.159018
CPK3FL	1	1	-0.156344
CPK3FL	1	1	-0.133755
CPK3FL	1	1	-0.16997
CPK3FL	1	1	-0.248561
CPK3FL	1	1	-0.288886
CPK3FL	1	1	-1.2504
CPK3FL	1	1	-0.88984
CPK3FL	1	1	-0.944419
CPK3FL	1	1	-0.501762
CPK3FL	1	1	-0.69338
CPK3FL	1	1	-5
CPK3FL	1	1	-5
CPK3FL	1	1	-0.807685
CPK3FL	1	1	-0.479236
CPK3FL	1	1	-1.07166
CPK3FL	1	1	0.226429
CPK3FL	1	1	-1.57468
CPK3FL	1	1	-1.55856
CPK3FL	1	1	-5
CPK3FL	1	1	-1.10615
CPK3FL	1	1	-0.310477
CPK3FL	1	1	-0.171472
CPK3FL	1	1	-0.877188
CPK3FL	1	1	-1.2474
CPK3FL	1	1	-5
CPK3FL	1	1	-2.55053
CPK3FL	1	1	-5
CPK3FL	1	1	-0.12271
CPK3FL	1	1	-0.111733
CPK3FL	1	1	-0.497179
CPK3FL	1	1	0.116118
CPK3FL	1	1	0.00919469
CPK3FL	1	1	-5
CPK3FL	1	1	-5
CPK3FL	1	1	-0.060907
CPK3FL	1	1	-0.28875
CPK3FL	1	1	-0.195502
CPK3FL	1	1	-0.176311
CPK3FL	1	1	-0.342694
CPK3FL	1	1	-1.82941
CPK3FL	1	1	-5
CPK3FL	1	1	-1.31489
CPK3FL	1	1	-5
CPK3FL	1	1	-0.295888
CPK3FL	1	1	-5
CPK3FL	1	1	0.14109
CPK3FL	1	1	0.149166
CPK3FL	1	1	0.0813297
CPK3FL	1	1	0.165746
CPK3FL	1	1	0.172602
CPK3FL	1	1	0.110541
CPK3FL	1	1	-2.22225
CPK3FL	1	1	-2.79794
CPK3FL	1	1	-5
CPK3FL	1	1	-0.376637
CPK3FL	1	1	-0.732046
CPK3FL	1	1	-0.374085
CPK3FL	1	1	-0.480915
CPK3FL	1	1	-0.403062
CPK3FL	1	1	-1.64655
CPK3FL	1	1	-1.41408
CPK3FL	1	1	-5
CPK3FL	1	1	-2.01823
CPK3FL	1	1	-5
CPK3FL	1	1	-1.52606
CPK3FL	1	1	-0.269334
CPK3FL	1	1	-0.131805
CPK3FL	1	1	-0.444095
CPK3FL	1	1	-0.436994
CPK3FL	1	1	-0.538915
CPK3FL	1	1	-5
CPK3FL	1	1	-0.557271
CPK3FL	1	1	0.14591
CPK3FL	1	1	-0.565212
CPK3FL	1	1	-0.585461
CPK3FL	1	1	-0.511877
CPK3FL	1	1	-0.377861
CPK3FL	1	1	-0.447042
CPK3FL	1	1	-1.63479
CPK3FL	1	1	-5
CPK3FL	1	1	-5
CPK3FL	1	1	0.67228
CPK3FL	1	1	-5
CPK3FL	1	1	-5
CPK3FL	1	1	-5
CPK3FL	1	1	-1.79388
CPK3FL	1	1	-5
CPK3FL	1	1	-1.55821
CPK3FL	1	1	-1.21713
CPK3FL	1	1	-1.40631
CPK3FL	1	1	-5
CPK3FL	1	1	-1.18411
CPK3FL	1	1	-1.51555
CPK3FL	1	1	-5
CPK3FL	1	1	-0.772216
CPK3FL	1	1	-2.23271
CPK3FL	1	1	-5
CPK3FL	1	1	-0.227388
CPK3FL	1	1	-0.207748
CPK3FL	1	1	-0.399184
CPK3FL	1	1	-0.401754
CPK3FL	1	1	-0.589396
CPK3FL	1	1	-0.347538
CPK3FL	1	1	-2.04269
CPK3FL	1	1	-5
CPK3FL	1	1	-2.23322
CPK3FL	1	1	-0.191052
CPK3FL	1	1	-0.251565
CPK3FL	1	1	-0.302187
CPK3FL	1	1	-0.200368
CPK3FL	1	1	-0.347883
CPK3FL	1	1	-0.260717
CPK3FL	1	1	-0.266156
CPK3FL	1	1	0.0204933
CPK3FL	1	1	-0.0408588
CPK3FL	1	1	-0.025239
CPK3FL	1	1	-0.239088
CPK3FL	1	1	-0.497659
CPK3FL	1	1	-0.166162
CPK3FL	1	1	-0.643846
CPK3FL	1	1	0.567408
CPK3FL	1	1	0.550912
CPK3FL	1	1	-0.235135
CPK3FL	1	1	-5
CPK3FL	1	1	-0.0964065
CPK3FL	1	1	-1.63752
CPK3FL	1	1	-0.496508
CPK3FL	1	1	-0.711312
CPK3FL	1	1	0.432924
CPK3FL	1	1	0.412102
CPK3FL	1	1	0.412986
CPK3FL	1	1	0.39956
CPK3FL	1	1	0.363969
CPK3FL	1	1	0.399651
CPK3FL	1	1	0.399825
CPK3FL	1	1	0.390513
CPK3FL	1	1	0.404084
CPK3FL	1	1	0.413204
CPK3FL	1	1	0.376785
CPK3FL	1	1	-1.08915
CPK3FL	1	1	-0.423141
CPK3FL	1	1	-0.955757
CPK3FL	1	1	-0.206818
CPK3FL	1	1	-1.05329
CPK3FL	1	1	-2.60722
CPK3FL	1	1	-5
CPK3FL	1	1	0.128625
CPK3FL	1	1	0.155857
CPK3FL	1	1	0.160255
CPK3FL	1	1	0.0908685
CPK3FL	1	1	-1.25611
CPK3FL	1	1	-5
CPK3FL	1	1	-1.01266
CPK3FL	1	1	0.049157
CPK3FL	1	1	0.0100108
CPK3FL	1	1	-5
CPK3FL	1	1	-5
CPK3FL	1	1	-1.66018
CPK3FL	1	1	-5
CPK3FL	1	1	-5
CPK3FL	1	1	-5
CPK3FL	1	1	-5
CPK3FL	1	1	-5
CPK3FL	1	1	0.475201
CPK3FL	1	1	0.251866
CPK3FL	1	1	0.325111
CPK3FL	1	1	0.273994
CPK3FL	1	1	-0.321027
CPK3FL	1	1	0.476917
CPK3FL	1	1	-0.569764
CPK3FL	1	1	-0.680275
CPK3FL	1	1	-5
CPK3FL	1	1	-5
CPK3FL	1	1	-2.37018
CPK3FL	1	1	-5
CPK3FL	1	1	-5
CPK3FL	1	1	-1.33822
CPK3FL	1	1	-0.913672
CPK3FL	1	1	0.110599
CPK3FL	1	1	0.0997903
CPK3FL	1	1	-0.0211516
CPK3FL	1	1	-0.00814439
CPK3FL	1	1	-0.141255
CPK3FL	1	1	-5
CPK3FL	1	1	-0.569192
CPK3FL	1	1	-2.02429
CPK3FL	1	1	0.13354
CPK3FL	1	1	-0.983949
CPK3FL	1	1	-0.615237
CPK3FL	1	1	-0.938379
CPK3FL	1	1	-0.712058
CPK3FL	1	1	-0.360472
CPK3FL	1	1	-5
CPK3FL	1	1	-5
CPK3FL	1	1	-1.40684
CPK3FL	1	1	-2.75252
CPK3FL	1	1	-5
CPK3FL	1	1	-5
CPK3FL	1	1	-5
CPK3FL	1	1	0.0979991
CPK3FL	1	1	-0.546283
CPK3FL	1	1	-0.768767
CPK3FL	1	1	-0.504964
CPK3FL	1	1	-0.232309
CPK3FL	1	1	-1.36519
CPK3FL	1	1	0.108489
CPK3FL	1	1	0.0742908
CPK3FL	1	1	-1.91982
CPK3FL	1	1	-1.41973
CPK3FL	1	1	-0.211192
CPK3FL	1	1	-1.71162
CPK3FL	1	1	-2.02892
CPK3FL	1	1	-0.211996
CPK3FL	1	1	-0.254517
CPK3FL	1	1	0.436588
CPK3FL	1	1	-0.281713
CPK3FL	1	1	-0.660043
CPK3FL	1	1	-0.00749171
CPK3FL	1	1	0.0479605
CPK3FL	1	1	-5
CPK3FL	1	1	-0.17657
CPK3FL	1	1	0.00133326
CPK3FL	1	1	-5
CPK3FL	1	1	-2.03901
CPK3FL	1	1	-1.81839
CPK3FL	1	1	-5
CPK3FL	1	1	-1.6496
CPK3FL	1	1	-5
CPK3FL	1	1	0.0956049
CPK3FL	1	1	-1.14741
CPK3FL	1	1	-1.16183
CPK3FL	1	1	-0.952856
CPK3FL	1	1	-1.10535
CPK3FL	1	1	-5
CPK3FL	1	1	-0.063079
CPK3FL	1	1	-2.25211
CPK3FL	1	1	-3.52174
CPK3FL	1	1	-5
CPK3FL	1	1	-5
CPK3FL	1	1	-0.348381
CPK3FL	1	1	-0.584486
CPK3FL	1	1	-1.18857
CPK3FL	1	1	-1.06323
CPK3FL	1	1	-0.189325
CPK3FL	1	1	-1.24849
CPK3FL	1	1	-0.53182
CPK3FL	1	1	0.318987
CPK3FL	1	1	-5
CPK3FL	1	1	-0.236995
CPK3FL	1	1	-0.163007
CPK3FL	1	1	-0.191566
CPK3FL	1	1	-0.206099
CPK3FL	1	1	-0.199987
CPK3FL	1	1	-0.380465
CPK3FL	1	1	-0.552845
CPK3FL	1	1	0.25822
CPK3FL	1	1	0.251673
CPK3FL	1	1	-0.382779
CPK3FL	1	1	-0.284133
CPK3FL	1	1	-0.652194
CPK3FL	1	1	-0.479382
CPK3FL	1	1	-0.650792
CPK3FL	1	1	-0.54631
CPK3FL	1	1	-5
CPK3FL	1	1	-0.0988123
CPK3FL	1	1	-1.28876
CPK3FL	1	1	-5
CPK3FL	1	1	-2.17831
CPK3FL	1	1	-1.14799
CPK3FL	1	1	-3.38022
CPK3FL	1	1	-1.71893
CPK3FL	1	1	-5
CPK3FL	1	1	-0.461063
CPK3FL	1	1	-0.469162
CPK3FL	1	1	-0.731348
CPK3FL	1	1	-0.642534
CPK3FL	1	1	-0.941468
CPK3FL	1	1	-0.610235
CPK3FL	1	1	-1.34472
CPK3FL	1	1	-5
CPK3FL	1	1	-1.09122
CPK3FL	1	1	-0.729425
CPK3FL	1	1	-0.539989
CPK3FL	1	1	-0.470188
CPK3FL	1	1	-0.657926
CPK3FL	1	1	-0.334441
CPK3FL	1	1	-0.53322
CPK3FL	1	1	-0.354195
CPK3FL	1	1	0.130902
CPK3FL	1	1	0.0304782
CPK3FL	1	1	0.140345
CPK3FL	1	1	0.104672
CPK3FL	1	1	0.117493
CPK3FL	1	1	-2.78716
CPK3FL	1	1	-2.01955
CPK3FL	1	1	-0.0894309
CPK3FL	1	1	-0.169817
CPK3FL	1	1	-0.316558
CPK3FL	1	1	-0.182082
CPK3FL	1	1	-0.713213
CPK3FL	1	1	-0.349774
CPK3FL	1	1	-0.383311
CPK3FL	1	1	-5
CPK3FL	1	1	-0.832858
CPK3FL	1	1	-0.745305
CPK3FL	1	1	-1.60367
CPK3FL	1	1	-5
CPK3FL	1	1	-0.493622
CPK3FL	1	1	-0.412535
CPK3FL	1	1	-0.954012
CPK3FL	1	1	-1.34274
CPK3FL	1	1	-0.729925
CPK3FL	1	1	-0.787172
CPK3FL	1	1	-0.347329
CPK3FL	1	1	-0.354726
CPK3FL	1	1	-0.281083
CPK3FL	1	1	-0.272506
CPK3FL	1	1	0.419676
CPK3FL	1	1	-0.360596
CPK3FL	1	1	-0.428474
CPK3FL	1	1	-0.334034
CPK3FL	1	1	-0.4184
CPK3FL	1	1	-0.126165
CPK3FL	1	1	-0.55844
CPK3FL	1	1	-0.675261
CPK3FL	1	1	-0.437094
CPK3FL	1	1	0.465109
CPK3FL	1	1	0.44819
CPK3FL	1	1	0.43194
CPK3FL	1	1	0.475373
CPK3FL	1	1	0.412945
CPK3FL	1	1	0.44844
CPK3FL	1	1	0.386347
CPK3FL	1	1	-0.589216
CPK3FL	1	1	-0.42792
CPK3FL	1	1	-0.387048
CPK3FL	1	1	0.328988
CPK3FL	1	1	-0.424843
CPK3FL	1	1	-0.3157
CPK3FL	1	1	-5
CPK3FL	1	1	-0.238766
CPK3FL	1	1	0.452513
CPK3FL	1	1	-0.00426019
CPK3FL	1	1	-0.61227
CPK3FL	1	1	-5
CPK3FL	1	1	-5
CPK3FL	1	1	-0.264652
CPK3FL	1	1	-0.230518
CPK3FL	1	1	-0.694694
CPK3FL	1	1	-0.300032
CPK3FL	1	1	-2.55673
CPK3FL	1	1	-5
CPK3FL	1	1	-5
CPK3FL	1	1	-5
CPK3FL	1	1	-5
CPK3FL	1	1	-5
CPK3FL	1	1	-0.563918
CPK3FL	1	1	-0.516139
CPK3FL	1	1	-1.54684
CPK3FL	1	1	-0.144919
CPK3FL	1	1	-0.0451232
CPK3FL	1	1	-0.301684
CPK3FL	1	1	-0.218625
CPK3FL	1	1	-0.205826
CPK3FL	1	1	-0.2119
CPK3FL	1	1	-0.342779
CPK3FL	1	1	-1.95943
CPK3FL	1	1	-0.985695
CPK3FL	1	1	-5
CPK3FL	1	1	-0.930167
CPK3FL	1	1	-5
CPK3FL	1	1	-1.81411
CPK3FL	1	1	-5
CPK3FL	1	1	-1.70781
CPK3FL	1	1	-5
CPK3FL	1	1	-5
CPK3FL	1	1	-1.64212
CPK3FL	1	1	0.356697
CPK3FL	1	1	0.318456
CPK3FL	1	1	-0.0705333
CPK3FL	1	1	-0.264493
CPK3FL	1	1	-0.735995
CPK3FL	1	1	-0.503407
CPK3FL	1	1	0.0685595
CPK3FL	1	1	-0.482742
CPK3FL	1	1	-2.51919
CPK3FL	1	1	-5
CPK3FL	1	1	-0.820113
CPK3FL	1	1	0.350658
CPK3FL	1	1	0.360711
CPK3FL	1	1	0.36692
CPK3FL	1	1	-0.283989
CPK3FL	1	1	-3.07708
CPK3FL	1	1	-5
CPK3FL	1	1	-0.758076
CPK3FL	1	1	-0.642975
CPK3FL	1	1	-0.491607
CPK3FL	1	1	-0.670764
CPK3FL	1	1	-5
CPK3FL	1	1	-1.12505
CPK3FL	1	1	-0.670871
CPK3FL	1	1	-0.876725
CPK3FL	1	1	-0.0875114
CPK3FL	1	1	-0.777786
CPK3FL	1	1	-1.22678
CPK3FL	1	1	-0.348871
CPK3FL	1	1	-0.378217
CPK3FL	1	1	-0.208813
CPK3FL	1	1	-0.564726
CPK3FL	1	1	-0.679438
CPK3FL	1	1	-0.264563
CPK3FL	1	1	-0.463774
CPK3FL	1	1	-0.537672
CPK3FL	1	1	-0.351217
CPK3FL	1	1	-0.406017
CPK3FL	1	1	-0.530079
CPK3FL	1	1	-0.460301
CPK3FL	1	1	0.26823
CPK3FL	1	1	0.283214
CPK3FL	1	1	0.274855
CPK3FL	1	1	0.279333
CPK3FL	1	1	0.250481
CPK3FL	1	1	-5
CPK3FL	1	1	-0.915622
CPK3FL	1	1	-0.811456
CPK3FL	1	1	-1.03408
CPK3FL	1	1	-0.504485
CPK3FL	1	1	-0.107618
CPK3FL	1	1	-0.138181
CPK3FL	1	1	-0.0760845
CPK3FL	1	1	-0.0794331
CPK3FL	1	1	-0.0867154
CPK3FL	1	1	-0.130956
CPK3FL	1	1	-0.109851
CPK3FL	1	1	-0.050188
CPK3FL	1	1	-0.0387993
CPK3FL	1	1	-0.0833245
CPK3FL	1	1	-0.932748
CPK3FL	1	1	-0.478294
CPK3FL	1	1	-0.105307
CPK3FL	1	1	-1.12396
CPK3FL	1	1	-1.00576
CPK3FL	1	1	-1.10749
CPK3FL	1	1	-0.954381
CPK3FL	1	1	-5
CPK3FL	1	1	-5
CPK3FL	1	1	-2.65819
CPK3FL	1	1	-1.31774
CPK3FL	1	1	-0.0121567
CPK3FL	1	1	-0.131581
CPK3FL	1	1	-0.754497
CPK3FL	1	1	-0.634665
CPK3FL	1	1	-0.122484
CPK3FL	1	1	-0.116166
CPK3FL	1	1	-0.766682
CPK3FL	1	1	-0.81211
CPK3FL	1	1	-1.20421
CPK3FL	1	1	-0.720679
CPK3FL	1	1	-0.916016
CPK3FL	1	1	-0.421936
CPK3FL	1	1	-0.248195
CPK3FL	1	1	-0.311834
CPK3FL	1	1	-0.33176
CPK3FL	1	1	0.221382
CPK3FL	1	1	0.147325
CPK3FL	1	1	0.212805
CPK3FL	1	1	-0.812471
CPK3FL	1	1	-0.00459884
CPK3FL	1	1	-0.0470611
CPK3FL	1	1	-0.0220473
CPK3FL	1	1	-0.0844956
CPK3FL	1	1	-0.101164
CPK3FL	1	1	-0.699613
CPK3FL	1	1	-3.11982
CPK3FL	1	1	-0.783227
CPK3FL	1	1	-1.78948
CPK3FL	1	1	-1.8124
CPK3FL	1	1	-0.943553
CPK3FL	1	1	0.170165
CPK3FL	1	1	0.0417681
CPK3FL	1	1	0.0731541
CPK3FL	1	1	-0.421304
CPK3FL	1	1	-0.418891
CPK3FL	1	1	-0.44165
CPK3FL	1	1	-0.473297
CPK3FL	1	1	-0.215207
CPK3FL	1	1	-0.0929941
CPK3FL	1	1	-0.117165
CPK3FL	1	1	-0.0196884
CPK3FL	1	1	0.115096
CPK3FL	1	1	-0.936065
CPK3FL	1	1	-1.06946
CPK3FL	1	1	-5
CPK3FL	1	1	-1.17984
CPK3FL	1	1	-5
CPK3FL	1	1	-1.78643
CPK3FL	1	1	-0.475595
CPK3FL	1	1	-5
CPK3FL	1	1	-1.22366
CPK3FL	1	1	-1.14657
CPK3FL	1	1	-1.0815
CPK3FL	1	1	-5
CPK3FL	1	1	-5
CPK3FL	1	1	-1.18129
CPK3FL	1	1	-1.30806
CPK3FL	1	1	-0.711788
CPK3FL	1	1	-1.0694
CPK3FL	1	1	-0.227435
CPK3FL	1	1	-0.144914
CPK3FL	1	1	-0.128851
CPK3FL	1	1	-0.315342
CPK3FL	1	1	-0.960185
CPK3FL	1	1	-5
CPK3FL	1	1	-5
CPK3FL	1	1	-2.1704
CPK3FL	1	1	-5
CPK3FL	1	1	-5
CPK3FL	1	1	-0.546359
CPK3FL	1	1	-0.828003
CPK3FL	1	1	-0.525134
CPK3FL	1	1	-0.516666
CPK3FL	1	1	-0.499577
CPK3FL	1	1	-2.03277
CPK3FL	1	1	-1.17144
CPK3FL	1	1	-5
CPK3FL	1	1	-5
CPK3FL	1	1	-0.177268
CPK3FL	1	1	-0.0923436
CPK3FL	1	1	-0.0884797
CPK3FL	1	1	-1.03681
CPK3FL	1	1	-0.679802
CPK3FL	1	1	-0.832831
CPK3FL	1	1	-5
CPK3FL	1	1	-0.50972
CPK3FL	1	1	0.0265646
CPK3FL	1	1	0.00939889
CPK3FL	1	1	-0.00869272
CPK3FL	1	1	-1.67782
CPK3FL	1	1	0.0964808
CPK3FL	1	1	0.102887
CPK3FL	1	1	-5
CPK3FL	1	1	-5
CPK3FL	1	1	-5
CPK3FL	1	1	-5
CPK3FL	1	1	0.153473
CPK3FL	1	1	0.219654
CPK3FL	1	1	-0.500729
CPK3FL	1	1	-0.342761
CPK3FL	1	1	-0.324348
CPK3FL	1	1	0.295569
CPK3FL	1	1	0.268678
CPK3FL	1	1	0.263476
CPK3FL	1	1	-0.273349
CPK3FL	1	1	-0.334853
CPK3FL	1	1	-0.609376
CPK3FL	1	1	-1.29051
CPK3FL	1	1	0.285557
CPK3FL	1	1	0.236199
CPK3FL	1	1	0.255146
CPK3FL	1	1	0.278694
CPK3FL	1	1	0.282877
CPK3FL	1	1	0.251874
CPK3FL	1	1	0.291977
CPK3FL	1	1	0.29229
CPK3FL	1	1	-5
CPK3FL	1	1	-0.412267
CPK3FL	1	1	-0.377887
CPK3FL	1	1	-1.22015
CPK3FL	1	1	-1.26725
CPK3FL	1	1	-5
CPK3FL	1	1	-4.78888
CPK3FL	1	1	-1.15439
CPK3FL	1	1	-0.369994
CPK3FL	1	1	-0.335619
CPK3FL	1	1	-0.36302
CPK3FL	1	1	-5
CPK3FL	1	1	-5
CPK3FL	1	1	-1.39694
CPK3FL	1	1	-5
CPK3FL	1	1	-0.703175
CPK3FL	1	1	-1.1527
CPK3FL	1	1	-1.54973
CPK3FL	1	1	-5
CPK3FL	1	1	-1.03377
CPK3FL	1	1	-1.12003
CPK3FL	1	1	-0.681204
CPK3FL	1	1	-0.778033
CPK3FL	1	1	-0.856546
CPK3FL	1	1	-5
CPK3FL	1	1	-0.184717
CPK3FL	1	1	-0.728612
CPK3FL	1	1	-0.63601
CPK3FL	1	1	-0.460597
CPK3FL	1	1	-0.398691
CPK3FL	1	1	-5
CPK3FL	1	1	-5
CPK3FL	1	1	0.278649
CPK3FL	1	1	-0.529371
CPK3FL	1	1	-0.765668
CPK3FL	1	1	-0.560113
CPK3FL	1	1	0.178286
CPK3FL	1	1	0.130212
CPK3FL	1	1	-1.0049
CPK3FL	1	1	-1.60323
CPK3FL	1	1	-5
CPK3FL	1	1	-0.217859
CPK3FL	1	1	-0.142579
CPK3FL	1	1	-0.184891
CPK3FL	1	1	-0.5538
CPK3FL	1	1	-0.317202
CPK3FL	1	1	-1.03345
CPK3FL	1	1	-0.0432256
CPK3FL	1	1	-0.105161
CPK3FL	1	1	-5
CPK3FL	1	1	-1.26626
CPK3FL	1	1	-5
CPK3FL	1	1	-1.54557
CPK3FL	1	1	-5
CPK3FL	1	1	-5
CPK3FL	1	1	-0.964891
CPK3FL	1	1	-1.15512
CPK3FL	1	1	-2.01604
CPK3FL	1	1	-5
CPK3FL	1	1	-0.473885
CPK3FL	1	1	-0.365096
CPK3FL	1	1	-5
CPK3FL	1	1	-1.32081
CPK3FL	1	1	-5
CPK3FL	1	1	-1.53549
CPK3FL	1	1	-5
CPK3FL	1	1	-5
CPK3FL	1	1	-0.0416117
CPK3FL	1	1	-0.754727
CPK3FL	1	1	-1.0777
CPK3FL	1	1	-0.639761
CPK3FL	1	1	-0.736686
CPK3FL	1	1	-0.654094
CPK3FL	1	1	-0.648767
CPK3FL	1	1	-1.25569
CPK3FL	1	1	-0.795981
CPK3FL	1	1	-5
CPK3FL	1	1	-5
CPK3FL	1	1	-0.13501
CPK3FL	1	1	-0.0572579
CPK3FL	1	1	-0.92929
CPK3FL	1	1	-2.76083
CPK3FL	1	1	-2.41625
CPK3FL	1	1	-5
CPK3FL	1	1	-2.24736
CPK3FL	1	1	-0.558539
CPK3FL	1	1	-0.677159
CPK3FL	1	1	-0.993373
CPK3FL	1	1	-0.477492
CPK3FL	1	1	-0.471028
CPK3FL	1	1	-0.439508
CPK3FL	1	1	-1.06098
CPK3FL	1	1	-0.865504
CPK3FL	1	1	-1.09361
CPK3FL	1	1	-2.47
CPK3FL	1	1	-2.04007
CPK3FL	1	1	-2.17167
CPK3FL	1	1	-1.97419
CPK3FL	1	1	-1.78233
CPK3FL	1	1	-0.641342
CPK3FL	1	1	-5
CPK3FL	1	1	-1.35119
CPK3FL	1	1	-2.36029
CPK3FL	1	1	-1.08551
CPK3FL	1	1	-1.11278
CPK3FL	1	1	-0.482091
CPK3FL	1	1	-0.492269
CPK3FL	1	1	-0.780182
CPK3FL	1	1	-5
CPK3FL	1	1	-0.806828
CPK3FL	1	1	-1.14462
CPK3FL	1	1	-5
CPK3FL	1	1	-5
CPK3FL	1	1	-2.52881
CPK3FL	1	1	-5
CPK3FL	1	1	-1.05711
CPK3FL	1	1	-0.897182
CPK3FL	1	1	-0.492562
CPK3FL	1	1	-0.417006
CPK3FL	1	1	-0.478836
CPK3FL	1	1	0.204256
CPK3FL	1	1	-0.337976
CPK3FL	1	1	-1.65379
CPK3FL	1	1	-0.245272
CPK3FL	1	1	-0.588004
CPK3FL	1	1	-5
CPK3FL	1	1	-5
CPK3FL	1	1	-1.6762
CPK3FL	1	1	-0.651457
CPK3FL	1	1	-0.590845
CPK3FL	1	1	-0.661091
CPK3FL	1	1	-5
CPK3FL	1	1	0.209621
CPK3FL	1	1	0.228005
CPK3FL	1	1	-0.906577
CPK3FL	1	1	-5
CPK3FL	1	1	-1.80078
CPK3FL	1	1	-5
CPK3FL	1	1	-1.75989
CPK3FL	1	1	-5
CPK3FL	1	1	-0.400838
CPK3FL	1	1	-0.490643
CPK3FL	1	1	-0.613529
CPK3FL	1	1	-0.170055
CPK3FL	1	1	-0.392478
CPK3FL	1	1	-0.688026
CPK3FL	1	1	-0.520574
CPK3FL	1	1	-5
CPK3FL	1	1	-5
CPK3FL	1	1	-1.14787
CPK3FL	1	1	-0.115967
CPK3FL	1	1	-0.165185
CPK3FL	1	1	-1.87731
CPK3FL	1	1	-0.231027
CPK3FL	1	1	-0.181839
CPK3FL	1	1	-0.738875
CPK3FL	1	1	-0.956945
CPK3FL	1	1	-5
CPK3FL	1	1	-5
CPK3FL	1	1	-0.64427
CPK3FL	1	1	-5
CPK3FL	1	1	-0.805237
CPK3FL	1	1	-5
CPK3FL	1	1	-5
CPK3FL	1	1	-1.99248
CPK3FL	1	1	-5
CPK3FL	1	1	0.546916
CPK3FL	1	1	-1.67219
CPK3FL	1	1	-5
CPK3FL	1	1	-1.34525
CPK3FL	1	1	-1.19837
CPK3FL	1	1	-1.19736
CPK3FL	1	1	0.119931
CPK3FL	1	1	-0.460016
CPK3FL	1	1	-0.435638
CPK3FL	1	1	-0.9572
CPK3FL	1	1	-5
CPK3FL	1	1	-5
CPK3FL	1	1	-5
CPK3FL	1	1	-0.248895
CPK3FL	1	1	-0.369375
CPK3FL	1	1	-0.192321
CPK3FL	1	1	-0.150406
CPK3FL	1	1	-0.205604
CPK3FL	1	1	-0.262264
CPK3FL	1	1	-0.191725
CPK3FL	1	1	-2.712
CPK3FL	1	1	-5
CPK3FL	1	1	-5
CPK3FL	1	1	-5
CPK3FL	1	1	-5
CPK3FL	1	1	-5
CPK3FL	1	1	-5
CPK3FL	1	1	-5
CPK3FL	1	1	-0.6792
CPK3FL	1	1	-0.951155
CPK3FL	1	1	-1.2873
CPK3FL	1	1	-1.40433
CPK3FL	1	1	-0.490796
CPK3FL	1	1	-0.597789
CPK3FL	1	1	-0.6756
CPK3FL	1	1	0.25965
CPK3FL	1	1	0.244051
CPK3FL	1	1	-0.00200966
CPK3FL	1	1	-5
CPK3FL	1	1	0.0715415
CPK3FL	1	1	-0.677558
CPK3FL	1	1	-1.08155
CPK3FL	1	1	-1.93689
CPK3FL	1	1	-5
CPK3FL	1	1	-0.950041
CPK3FL	1	1	-0.767128
CPK3FL	1	1	-0.638996
CPK3FL	1	1	-0.296272
CPK3FL	1	1	-0.602593
CPK3FL	1	1	-0.517137
CPK3FL	1	1	-5
CPK3FL	1	1	-0.57214
CPK3FL	1	1	-0.53004
CPK3FL	1	1	-0.738832
CPK3FL	1	1	-0.471195
CPK3FL	1	1	-5
CPK3FL	1	1	-5
CPK3FL	1	1	0.0371761
CPK3FL	1	1	-2.78109
CPK3FL	1	1	-0.206903
CPK3FL	1	1	-0.0534199
CPK3FL	1	1	-5
CPK3FL	1	1	0.255033
CPK3FL	1	1	0.252576
CPK3FL	1	1	0.208068
CPK3FL	1	1	-0.49327
CPK3FL	1	1	-0.792974
CPK3FL	1	1	-1.33351
CPK3FL	1	1	-1.44992
CPK3FL	1	1	-1.3387
CPK3FL	1	1	-1.44377
CPK3FL	1	1	-5
CPK3FL	1	1	-1.35918
CPK3FL	1	1	-1.03642
CPK3FL	1	1	-5
CPK3FL	1	1	-1.13477
CPK3FL	1	1	-1.15362
CPK3FL	1	1	-1.18588
CPK3FL	1	1	-0.324154
CPK3FL	1	1	-0.523443
CPK3FL	1	1	-2.25045
CPK3FL	1	1	0.0485025
CPK3FL	1	1	-0.122071
CPK3FL	1	1	-2.3006
CPK3FL	1	1	-5
CPK3FL	1	1	-2.26024
CPK3FL	1	1	-0.285737
CPK3FL	1	1	-0.546454
CPK3FL	1	1	0.67843
CPK3FL	1	1	-0.578331
CPK3FL	1	1	-0.94519
CPK3FL	1	1	-5
CPK3FL	1	1	-1.21655
CPK3FL	1	1	-2.16315
CPK3FL	1	1	-0.446809
CPK3FL	1	1	-1.16954
CPK3FL	1	1	-0.572228
CPK3FL	1	1	-5
CPK3FL	1	1	-0.605947
CPK3FL	1	1	-0.216871
CPK3FL	1	1	-1.81901
CPK3FL	1	1	-2.93479
CPK3FL	1	1	-5
CPK3FL	1	1	-5
CPK3FL	1	1	-5
CPK3FL	1	1	-0.100725
CPK3FL	1	1	-0.052148
CPK3FL	1	1	-0.0432225
CPK3FL	1	1	-0.057894
CPK3FL	1	1	-0.0782818
CPK3FL	1	1	-2.35113
CPK3FL	1	1	-5
CPK3FL	1	1	-1.2045
CPK3FL	1	1	-0.611234
CPK3FL	1	1	-0.328457
CPK3FL	1	1	-0.622318
CPK3FL	1	1	-0.452004
CPK3FL	1	1	-0.308074
CPK3FL	1	1	-5
CPK3FL	1	1	-0.791404
CPK3FL	1	1	-5
CPK3FL	1	1	-0.930195
CPK3FL	1	1	-0.152046
CPK3FL	1	1	-0.162912
CPK3FL	1	1	-0.173378
CPK3FL	1	1	0.104571
CPK3FL	1	1	0.067441
CPK3FL	21_07_30	2	-0.920999
CPK3FL	21_07_30	2	-5
CPK3FL	21_07_30	2	-5
CPK3FL	21_07_30	2	-1.13465
CPK3FL	21_07_30	2	-5
CPK3FL	21_07_30	2	-1.20364
CPK3FL	21_07_30	2	-0.484818
CPK3FL	21_07_30	2	0.211634
CPK3FL	21_07_30	2	-5
CPK3FL	21_07_30	2	-0.39327
CPK3FL	21_07_30	2	-1.58374
CPK3FL	21_07_30	2	-0.732665
CPK3FL	21_07_30	2	-0.735192
CPK3FL	21_07_30	2	-1.13905
CPK3FL	21_07_30	2	-0.367954
CPK3FL	21_07_30	2	-0.577008
CPK3FL	21_07_30	2	-0.740928
CPK3FL	21_07_30	2	-0.665111
CPK3FL	21_07_30	2	-0.309778
CPK3FL	21_07_30	2	-0.198242
CPK3FL	21_07_30	2	-0.282613
CPK3FL	21_07_30	2	-1.00235
CPK3FL	21_07_30	2	-5
CPK3FL	21_07_30	2	-0.469763
CPK3FL	21_07_30	2	-0.418025
CPK3FL	21_07_30	2	-0.276579
CPK3FL	21_07_30	2	-1.24468
CPK3FL	21_07_30	2	-5
CPK3FL	21_07_30	2	-0.962704
CPK3FL	21_07_30	2	-1.39738
CPK3FL	21_07_30	2	-0.603925
CPK3FL	21_07_30	2	-0.505015
CPK3FL	21_07_30	2	-5
CPK3FL	21_07_30	2	-5
CPK3FL	21_07_30	2	-0.241492
CPK3FL	21_07_30	2	-5
CPK3FL	21_07_30	2	-0.496167
CPK3FL	21_07_30	2	-0.227265
CPK3FL	21_07_30	2	-0.2587
CPK3FL	21_07_30	2	-0.984495
CPK3FL	21_07_30	2	-0.931169
CPK3FL	21_07_30	2	-0.891907
CPK3FL	21_07_30	2	-5
CPK3FL	21_07_30	2	-1.13533
CPK3FL	21_07_30	2	-0.0960442
CPK3FL	21_07_30	2	-0.249043
CPK3FL	21_07_30	2	-0.763122
CPK3FL	21_07_30	2	-0.602469
CPK3FL	21_07_30	2	-0.4684
CPK3FL	21_07_30	2	-0.648932
CPK3FL	21_07_30	2	-0.42908
CPK3FL	21_07_30	2	-0.379432
CPK3FL	21_07_30	2	-0.460476
CPK3FL	21_07_30	2	-5
CPK3FL	21_07_30	2	-0.956317
CPK3FL	21_07_30	2	0.110006
CPK3FL	21_07_30	2	-1.97513
CPK3FL	21_07_30	2	-5
CPK3FL	21_07_30	2	-0.160105
CPK3FL	21_07_30	2	-0.100697
CPK3FL	21_07_30	2	-1.9465
CPK3FL	21_07_30	2	-5
CPK3FL	21_07_30	2	0.511243
CPK3FL	21_07_30	2	0.484089
CPK3FL	21_07_30	2	0.479629
CPK3FL	21_07_30	2	-0.912554
CPK3FL	21_07_30	2	-5
CPK3FL	21_07_30	2	-5
CPK3FL	21_07_30	2	-0.62249
CPK3FL	21_07_30	2	-1.89159
CPK3FL	21_07_30	2	-0.796401
CPK3FL	21_07_30	2	-0.782334
CPK3FL	21_07_30	2	-0.961911
CPK3FL	21_07_30	2	0.236059
CPK3FL	21_07_30	2	0.169871
CPK3FL	21_07_30	2	0.227623
CPK3FL	21_07_30	2	0.204482
CPK3FL	21_07_30	2	0.222658
CPK3FL	21_07_30	2	0.134313
CPK3FL	21_07_30	2	0.249214
CPK3FL	21_07_30	2	-5
CPK3FL	21_07_30	2	-3.56973
CPK3FL	21_07_30	2	-1.01103
CPK3FL	21_07_30	2	-0.233657
CPK3FL	21_07_30	2	-0.13858
CPK3FL	21_07_30	2	-0.0153035
CPK3FL	21_07_30	2	0.0436549
CPK3FL	21_07_30	2	-0.678836
CPK3FL	21_07_30	2	-5
CPK3FL	21_07_30	2	-0.224284
CPK3FL	21_07_30	2	-0.369804
CPK3FL	21_07_30	2	-0.629451
CPK3FL	21_07_30	2	-0.353821
CPK3FL	21_07_30	2	-0.330932
CPK3FL	21_07_30	2	-0.554862
CPK3FL	21_07_30	2	-0.130572
CPK3FL	21_07_30	2	-0.0227209
CPK3FL	21_07_30	2	-0.0316217
CPK3FL	21_07_30	2	-0.580711
CPK3FL	21_07_30	2	-0.316528
CPK3FL	21_07_30	2	-0.256736
CPK3FL	21_07_30	2	-0.381236
CPK3FL	21_07_30	2	-0.118059
CPK3FL	21_07_30	2	0.22817
CPK3FL	21_07_30	2	-0.468261
CPK3FL	21_07_30	2	-5
CPK3FL	21_07_30	2	-0.0767962
CPK3FL	21_07_30	2	-0.00335134
CPK3FL	21_07_30	2	0.21576
CPK3FL	21_07_30	2	0.251596
CPK3FL	21_07_30	2	0.228855
CPK3FL	21_07_30	2	-5
CPK3FL	21_07_30	2	-0.833065
CPK3FL	21_07_30	2	-0.729316
CPK3FL	21_07_30	2	-0.338997
CPK3FL	21_07_30	2	-0.392585
CPK3FL	21_07_30	2	-0.204283
CPK3FL	21_07_30	2	-0.00632459
CPK3FL	21_07_30	2	-0.087453
CPK3FL	21_07_30	2	-0.0904817
CPK3FL	21_07_30	2	-5
CPK3FL	21_07_30	2	-0.630094
CPK3FL	21_07_30	2	-0.452728
CPK3FL	21_07_30	2	-0.380413
CPK3FL	21_07_30	2	-0.594697
CPK3FL	21_07_30	2	-1.01108
CPK3FL	21_07_30	2	-0.908133
CPK3FL	21_07_30	2	-1.00967
CPK3FL	21_07_30	2	-1.01167
CPK3FL	21_07_30	2	0.19809
CPK3FL	21_07_30	2	0.043101
CPK3FL	21_07_30	2	-0.0674211
CPK3FL	21_07_30	2	-1.42456
CPK3FL	21_07_30	2	-0.697507
CPK3FL	21_07_30	2	-0.852438
CPK3FL	21_07_30	2	-1.24957
CPK3FL	21_07_30	2	-0.569884
CPK3FL	21_07_30	2	-0.331121
CPK3FL	21_07_30	2	-5
CPK3FL	21_07_30	2	-5
CPK3FL	21_07_30	2	-1.68975
CPK3FL	21_07_30	2	-0.126571
CPK3FL	21_07_30	2	-1.15501
CPK3FL	21_07_30	2	-0.677674
CPK3FL	21_07_30	2	-1.01566
CPK3FL	21_07_30	2	-1.79143
CPK3FL	21_07_30	2	-1.14576
CPK3FL	21_07_30	2	-5
CPK3FL	21_07_30	2	-0.483742
CPK3FL	21_07_30	2	-0.846604
CPK3FL	21_07_30	2	-0.0572357
CPK3FL	21_07_30	2	0.2549
CPK3FL	21_07_30	2	0.245625
CPK3FL	21_07_30	2	-0.421911
CPK3FL	21_07_30	2	-0.354338
CPK3FL	21_07_30	2	-5
CPK3FL	21_07_30	2	-1.04429
CPK3FL	21_07_30	2	0.370402
CPK3FL	21_07_30	2	-1.18826
CPK3FL	21_07_30	2	-5
CPK3FL	21_07_30	2	-5
CPK3FL	21_07_30	2	-5
CPK3FL	21_07_30	2	-1.143
CPK3FL	21_07_30	2	-0.882669
CPK3FL	21_07_30	2	-0.610717
CPK3FL	21_07_30	2	0.043391
CPK3FL	21_07_30	2	-0.0309269
CPK3FL	21_07_30	2	-0.0840965
CPK3FL	21_07_30	2	0.247852
CPK3FL	21_07_30	2	-0.435888
CPK3FL	21_07_30	2	-5
CPK3FL	21_07_30	2	0.249282
CPK3FL	21_07_30	2	0.182423
CPK3FL	21_07_30	2	0.210696
CPK3FL	21_07_30	2	-0.201341
CPK3FL	21_07_30	2	-0.732045
CPK3FL	21_07_30	2	-0.926851
CPK3FL	21_07_30	2	-0.595727
CPK3FL	21_07_30	2	-5
CPK3FL	21_07_30	2	-5
CPK3FL	21_07_30	2	-5
CPK3FL	21_07_30	2	-5
CPK3FL	21_07_30	2	-5
CPK3FL	21_07_30	2	-5
CPK3FL	21_07_30	2	0.304897
CPK3FL	21_07_30	2	0.295886
CPK3FL	21_07_30	2	0.303361
CPK3FL	21_07_30	2	0.0783823
CPK3FL	21_07_30	2	-0.446344
CPK3FL	21_07_30	2	-0.645551
CPK3FL	21_07_30	2	-1.06641
CPK3FL	21_07_30	2	-5
CPK3FL	21_07_30	2	-5
CPK3FL	21_07_30	2	-1.0147
CPK3FL	21_07_30	2	-0.709726
CPK3FL	21_07_30	2	0.00130771
CPK3FL	21_07_30	2	0.0441426
CPK3FL	21_07_30	2	0.016312
CPK3FL	21_07_30	2	0.0368767
CPK3FL	21_07_30	2	-0.571798
CPK3FL	21_07_30	2	-5
CPK3FL	21_07_30	2	-5
CPK3FL	21_07_30	2	-1.33534
CPK3FL	21_07_30	2	-5
CPK3FL	21_07_30	2	-2.88319
CPK3FL	21_07_30	2	-1.69499
CPK3FL	21_07_30	2	-5
CPK3FL	21_07_30	2	-1.88704
CPK3FL	21_07_30	2	-0.326154
CPK3FL	21_07_30	2	-0.638748
CPK3FL	21_07_30	2	-0.247189
CPK3FL	21_07_30	2	-0.736721
CPK3FL	21_07_30	2	0.0846809
CPK3FL	21_07_30	2	-0.176935
CPK3FL	21_07_30	2	-0.121205
CPK3FL	21_07_30	2	-0.153004
CPK3FL	21_07_30	2	-0.942784
CPK3FL	21_07_30	2	0.559834
CPK3FL	21_07_30	2	0.559252
CPK3FL	21_07_30	2	-1.14295
CPK3FL	21_07_30	2	-0.644559
CPK3FL	21_07_30	2	-0.365895
CPK3FL	21_07_30	2	-0.253718
CPK3FL	21_07_30	2	-0.300229
CPK3FL	21_07_30	2	0.037547
CPK3FL	21_07_30	2	0.0535835
CPK3FL	21_07_30	2	-0.0146016
CPK3FL	21_07_30	2	-5
CPK3FL	21_07_30	2	-1.31433
CPK3FL	21_07_30	2	-1.17287
CPK3FL	21_07_30	2	-1.72414
CPK3FL	21_07_30	2	-1.01186
CPK3FL	21_07_30	2	-1.62378
CPK3FL	21_07_30	2	-0.11666
CPK3FL	21_07_30	2	-0.262414
CPK3FL	21_07_30	2	-0.202743
CPK3FL	21_07_30	2	-0.47691
CPK3FL	21_07_30	2	-1.45761
CPK3FL	21_07_30	2	0.101731
CPK3FL	21_07_30	2	-0.302461
CPK3FL	21_07_30	2	-1.2029
CPK3FL	21_07_30	2	-5
CPK3FL	21_07_30	2	-0.857228
CPK3FL	21_07_30	2	-1.2193
CPK3FL	21_07_30	2	-1.29113
CPK3FL	21_07_30	2	0.00282898
CPK3FL	21_07_30	2	-0.803866
CPK3FL	21_07_30	2	-0.727061
CPK3FL	21_07_30	2	-1.12614
CPK3FL	21_07_30	2	-0.82571
CPK3FL	21_07_30	2	-0.868829
CPK3FL	21_07_30	2	-0.37194
CPK3FL	21_07_30	2	-5
CPK3FL	21_07_30	2	-1.07748
CPK3FL	21_07_30	2	-5
CPK3FL	21_07_30	2	-1.78235
CPK3FL	21_07_30	2	-0.432943
CPK3FL	21_07_30	2	-0.728877
CPK3FL	21_07_30	2	-1.74487
CPK3FL	21_07_30	2	-0.415924
CPK3FL	21_07_30	2	-0.455682
CPK3FL	21_07_30	2	-1.84378
CPK3FL	21_07_30	2	-1.26093
CPK3FL	21_07_30	2	0.0833364
CPK3FL	21_07_30	2	-5
CPK3FL	21_07_30	2	-0.761369
CPK3FL	21_07_30	2	-0.540457
CPK3FL	21_07_30	2	0.383928
CPK3FL	21_07_30	2	0.350865
CPK3FL	21_07_30	2	0.349137
CPK3FL	21_07_30	2	-0.403721
CPK3FL	21_07_30	2	-5
CPK3FL	21_07_30	2	-0.320125
CPK3FL	21_07_30	2	-5
CPK3FL	21_07_30	2	-0.436118
CPK3FL	21_07_30	2	-0.495777
CPK3FL	21_07_30	2	-0.419394
CPK3FL	21_07_30	2	-0.328378
CPK3FL	21_07_30	2	-0.48357
CPK3FL	21_07_30	2	-0.296718
CPK3FL	21_07_30	2	-0.720237
CPK3FL	21_07_30	2	-0.706277
CPK3FL	21_07_30	2	-5
CPK3FL	21_07_30	2	-0.519671
CPK3FL	21_07_30	2	-0.656199
CPK3FL	21_07_30	2	-0.911179
CPK3FL	21_07_30	2	-0.705489
CPK3FL	21_07_30	2	-0.60495
CPK3FL	21_07_30	2	0.103535
CPK3FL	21_07_30	2	0.155816
CPK3FL	21_07_30	2	-1.66219
CPK3FL	21_07_30	2	-5
CPK3FL	21_07_30	2	-0.754061
CPK3FL	21_07_30	2	-5
CPK3FL	21_07_30	2	-0.621943
CPK3FL	21_07_30	2	-0.759381
CPK3FL	21_07_30	2	-5
CPK3FL	21_07_30	2	-5
CPK3FL	21_07_30	2	-5
CPK3FL	21_07_30	2	-5
CPK3FL	21_07_30	2	-5
CPK3FL	21_07_30	2	-1.37381
CPK3FL	21_07_30	2	-0.81921
CPK3FL	21_07_30	2	-0.0852805
CPK3FL	21_07_30	2	-0.189117
CPK3FL	21_07_30	2	-0.122091
CPK3FL	21_07_30	2	-0.0997988
CPK3FL	21_07_30	2	-1.76848
CPK3FL	21_07_30	2	-1.21975
CPK3FL	21_07_30	2	-5
CPK3FL	21_07_30	2	-0.314181
CPK3FL	21_07_30	2	-0.409552
CPK3FL	21_07_30	2	-0.272883
CPK3FL	21_07_30	2	-0.246498
CPK3FL	21_07_30	2	-5
CPK3FL	21_07_30	2	-0.423307
CPK3FL	21_07_30	2	-0.444271
CPK3FL	21_07_30	2	-0.734279
CPK3FL	21_07_30	2	-0.354081
CPK3FL	21_07_30	2	-0.163733
CPK3FL	21_07_30	2	-0.797678
CPK3FL	21_07_30	2	-1.1965
CPK3FL	21_07_30	2	-1.06041
CPK3FL	21_07_30	2	-5
CPK3FL	21_07_30	2	-1.40082
CPK3FL	21_07_30	2	-0.854406
CPK3FL	21_07_30	2	-0.934672
CPK3FL	21_07_30	2	-0.63442
CPK3FL	21_07_30	2	-0.667179
CPK3FL	21_07_30	2	-0.244144
CPK3FL	21_07_30	2	-0.183292
CPK3FL	21_07_30	2	-0.140697
CPK3FL	21_07_30	2	-0.19584
CPK3FL	21_07_30	2	-2.38546
CPK3FL	21_07_30	2	-0.47092
CPK3FL	21_07_30	2	-0.328151
CPK3FL	21_07_30	2	-0.663036
CPK3FL	21_07_30	2	-0.558988
CPK3FL	21_07_30	2	-5
CPK3FL	21_07_30	2	-0.993252
CPK3FL	21_07_30	2	-0.111808
CPK3FL	21_07_30	2	-0.783436
CPK3FL	21_07_30	2	0.469894
CPK3FL	21_07_30	2	0.456102
CPK3FL	21_07_30	2	-0.0973879
CPK3FL	21_07_30	2	0.0179119
CPK3FL	21_07_30	2	-5
CPK3FL	21_07_30	2	-5
CPK3FL	21_07_30	2	-1.576
CPK3FL	21_07_30	2	-5
CPK3FL	21_07_30	2	-0.427719
CPK3FL	21_07_30	2	-0.346611
CPK3FL	21_07_30	2	-0.17377
CPK3FL	21_07_30	2	-0.919169
CPK3FL	21_07_30	2	-0.580748
CPK3FL	21_07_30	2	-0.359978
CPK3FL	21_07_30	2	-0.54787
CPK3FL	21_07_30	2	-0.574236
CPK3FL	21_07_30	2	-0.46756
CPK3FL	21_07_30	2	-0.58663
CPK3FL	21_07_30	2	-1.06946
CPK3FL	21_07_30	2	-0.770094
CPK3FL	21_07_30	2	-5
CPK3FL	21_07_30	2	-0.33927
CPK3FL	21_07_30	2	-0.312656
CPK3FL	21_07_30	2	-1.48461
CPK3FL	21_07_30	2	0.306902
CPK3FL	21_07_30	2	0.290444
CPK3FL	21_07_30	2	0.243275
CPK3FL	21_07_30	2	-5
CPK3FL	21_07_30	2	-0.550363
CPK3FL	21_07_30	2	-0.410835
CPK3FL	21_07_30	2	-0.267537
CPK3FL	21_07_30	2	-5
CPK3FL	21_07_30	2	-1.04357
CPK3FL	21_07_30	2	-0.355881
CPK3FL	21_07_30	2	-0.303458
CPK3FL	21_07_30	2	-0.252822
CPK3FL	21_07_30	2	-0.311405
CPK3FL	21_07_30	2	-5
CPK3FL	21_07_30	2	-0.866627
CPK3FL	21_07_30	2	-5
CPK3FL	21_07_30	2	0.0587178
CPK3FL	21_07_30	2	-0.0308784
CPK3FL	21_07_30	2	-0.124416
CPK3FL	21_07_30	2	-0.0702603
CPK3FL	21_07_30	2	-0.0667278
CPK3FL	21_07_30	2	0.35384
CPK3FL	21_07_30	2	0.0258647
CPK3FL	21_07_30	2	-0.874503
CPK3FL	21_07_30	2	-1.7335
CPK3FL	21_07_30	2	-0.537633
CPK3FL	21_07_30	2	-0.808262
CPK3FL	21_07_30	2	-0.430351
CPK3FL	21_07_30	2	-1.23334
CPK3FL	21_07_30	2	-0.164519
CPK3FL	21_07_30	2	-0.42628
CPK3FL	21_07_30	2	-0.439664
CPK3FL	21_07_30	2	-0.203666
CPK3FL	21_07_30	2	-5
CPK3FL	21_07_30	2	-0.938503
CPK3FL	21_07_30	2	-5
CPK3FL	21_07_30	2	-5
CPK3FL	21_07_30	2	-5
CPK3FL	21_07_30	2	-5
CPK3FL	21_07_30	2	-0.0795697
CPK3FL	21_07_30	2	-0.143395
CPK3FL	21_07_30	2	-0.0452332
CPK3FL	21_07_30	2	-0.0851571
CPK3FL	21_07_30	2	-0.985416
CPK3FL	21_07_30	2	-1.10002
CPK3FL	21_07_30	2	-0.768492
CPK3FL	21_07_30	2	0.177128
CPK3FL	21_07_30	2	0.151437
CPK3FL	21_07_30	2	0.0775576
CPK3FL	21_07_30	2	0.0735198
CPK3FL	21_07_30	2	-0.560833
CPK3FL	21_07_30	2	0.652459
CPK3FL	21_07_30	2	-2.11391
CPK3FL	21_07_30	2	-1.35629
CPK3FL	21_07_30	2	-5
CPK3FL	21_07_30	2	-0.905516
CPK3FL	21_07_30	2	-0.40246
CPK3FL	21_07_30	2	-0.391406
CPK3FL	21_07_30	2	0.154792
CPK3FL	21_07_30	2	-1.57054
CPK3FL	21_07_30	2	-5
CPK3FL	21_07_30	2	-5
CPK3FL	21_07_30	2	-0.409031
CPK3FL	21_07_30	2	-0.240411
CPK3FL	21_07_30	2	-1.79641
CPK3FL	21_07_30	2	-1.43907
CPK3FL	21_07_30	2	-0.426575
CPK3FL	21_07_30	2	-0.042235
CPK3FL	21_07_30	2	-0.360068
CPK3FL	21_07_30	2	-0.978007
CPK3FL	21_07_30	2	-0.660036
CPK3FL	21_07_30	2	-0.776064
CPK3FL	21_07_30	2	-0.746433
CPK3FL	21_07_30	2	-0.671279
CPK3FL	21_07_30	2	-0.41238
CPK3FL	21_07_30	2	-0.660596
CPK3FL	21_07_30	2	-0.847547
CPK3FL	21_07_30	2	-0.18122
CPK3FL	21_07_30	2	-0.201798
CPK3FL	21_07_30	2	-0.119391
CPK3FL	21_07_30	2	-0.170518
CPK3FL	21_07_30	2	-1.05509
CPK3FL	21_07_30	2	-0.467151
CPK3FL	21_07_30	2	-0.594891
CPK3FL	21_07_30	2	-0.154412
CPK3FL	21_07_30	2	-0.0386909
CPK3FL	21_07_30	2	-2.56401
CPK3FL	21_07_30	2	-5
CPK3FL	21_07_30	2	-1.93774
CPK3FL	21_07_30	2	-5
CPK3FL	21_07_30	2	-0.52739
CPK3FL	21_07_30	2	-0.412047
CPK3FL	21_07_30	2	-0.455102
CPK3FL	21_07_30	2	-0.460623
CPK3FL	21_07_30	2	-0.36676
CPK3FL	21_07_30	2	-0.426906
CPK3FL	21_07_30	2	-1.14282
CPK3FL	21_07_30	2	-5
CPK3FL	21_07_30	2	0.229436
CPK3FL	21_07_30	2	0.250721
CPK3FL	21_07_30	2	-5
CPK3FL	21_07_30	2	-0.593555
CPK3FL	21_07_30	2	-0.78225
CPK3FL	21_07_30	2	-0.892165
CPK3FL	21_07_30	2	-3.33921
CPK3FL	21_07_30	2	0.132436
CPK3FL	21_07_30	2	0.0904328
CPK3FL	21_07_30	2	0.135524
CPK3FL	21_07_30	2	-5
CPK3FL	21_07_30	2	-0.904001
CPK3FL	21_07_30	2	-0.770403
CPK3FL	21_07_30	2	-1.19252
CPK3FL	21_07_30	2	0.236972
CPK3FL	21_07_30	2	0.25825
CPK3FL	21_07_30	2	-0.333979
CPK3FL	21_07_30	2	-0.699702
CPK3FL	21_07_30	2	-0.700385
CPK3FL	21_07_30	2	-0.168365
CPK3FL	21_07_30	2	-0.70423
CPK3FL	21_07_30	2	-0.801095
CPK3FL	21_07_30	2	-0.493806
CPK3FL	21_07_30	2	0.385703
CPK3FL	21_07_30	2	0.277581
CPK3FL	21_07_30	2	-1.12386
CPK3FL	21_07_30	2	-0.748787
CPK3FL	21_07_30	2	-0.488428
CPK3FL	21_07_30	2	-0.7279
CPK3FL	21_07_30	2	-0.369831
CPK3FL	21_07_30	2	-0.291717
CPK3FL	21_07_30	2	-0.409984
CPK3FL	21_07_30	2	-0.323639
CPK3FL	21_07_30	2	-5
CPK3FL	21_07_30	2	-0.33616
CPK3FL	21_07_30	2	-0.410693
CPK3FL	21_07_30	2	-0.300981
CPK3FL	21_07_30	2	-1.04679
CPK3FL	21_07_30	2	-1.20353
CPK3FL	21_07_30	2	-5
CPK3FL	21_07_30	2	-1.14301
CPK3FL	21_07_30	2	-0.840258
CPK3FL	21_07_30	2	0.252613
CPK3FL	21_07_30	2	0.240218
CPK3FL	21_07_30	2	0.205652
CPK3FL	21_07_30	2	0.396951
CPK3FL	21_07_30	2	0.38059
CPK3FL	21_07_30	2	-0.269589
CPK3FL	21_07_30	2	-5
CPK3FL	21_07_30	2	-1.21289
CPK3FL	21_07_30	2	-0.741708
CPK3FL	21_07_30	2	-1.88681
CPK3FL	21_07_30	2	-0.424667
CPK3FL	21_07_30	2	-5
CPK3FL	21_07_30	2	-0.172349
CPK3FL	21_07_30	2	-1.17019
CPK3FL	21_07_30	2	-0.00510046
CPK3FL	21_07_30	2	-1.20101
CPK3FL	21_07_30	2	-1.76895
CPK3FL	21_07_30	2	-0.624068
CPK3FL	21_07_30	2	-1.27875
CPK3FL	21_07_30	2	-5
CPK3FL	21_07_30	2	-5
CPK3FL	21_07_30	2	-2.20805
CPK3FL	21_07_30	2	-1.32202
CPK3FL	21_07_30	2	0.242582
CPK3FL	21_07_30	2	-0.178038
CPK3FL	21_07_30	2	-0.160015
CPK3FL	21_07_30	2	-0.0894923
CPK3FL	21_07_30	2	-5
CPK3FL	21_07_30	2	-0.746443
CPK3FL	21_07_30	2	-0.845755
CPK3FL	21_07_30	2	0.0118005
CPK3FL	21_07_30	2	0.0230476
CPK3FL	21_07_30	2	-0.818336
CPK3FL	21_07_30	2	0.0933454
CPK3FL	21_07_30	2	0.0891485
CPK3FL	21_07_30	2	-1.21765
CPK3FL	21_07_30	2	-0.415061
CPK3FL	21_07_30	2	-0.875669
CPK3FL	21_07_30	2	-0.292025
CPK3FL	21_07_30	2	-0.596203
CPK3FL	21_07_30	2	-1.72112
CPK3FL	21_07_30	2	-5
CPK3FL	21_07_30	2	-5
CPK3FL	21_07_30	2	-0.930835
CPK3FL	21_07_30	2	-0.670492
CPK3FL	21_07_30	2	-0.359029
CPK3FL	21_07_30	2	-0.322973
CPK3FL	21_07_30	2	-0.70208
CPK3FL	21_07_30	2	-0.407521
CPK3FL	21_07_30	2	-5
CPK3FL	21_07_30	2	-0.989705
CPK3FL	21_07_30	2	-0.72659
CPK3FL	21_07_30	2	-5
CPK3FL	21_07_30	2	-0.790059
CPK3FL	21_07_30	2	-0.256111
CPK3FL	21_07_30	2	-0.214804
CPK3FL	21_07_30	2	-0.26208
CPK3FL	21_07_30	2	-1.18113
CPK3FL	21_07_30	2	-1.06163
CPK3FL	21_07_30	2	-0.796442
CPK3FL	21_07_30	2	-5
CPK3FL	21_07_30	2	-1.00957
CPK3FL	21_07_30	2	-0.704986
CPK3FL	21_07_30	2	-1.01895
CPK3FL	21_07_30	2	-1.74949
CPK3FL	21_07_30	2	-5
CPK3FL	21_07_30	2	-5
CPK3FL	21_07_30	2	-0.143051
CPK3FL	21_07_30	2	-0.133619
CPK3FL	21_07_30	2	-1.0385
CPK3FL	21_07_30	2	-1.01034
CPK3FL	21_07_30	2	-5
CPK3FL	21_07_30	2	-1.08772
CPK3FL	21_07_30	2	-5
CPK3FL	21_07_30	2	-0.524885
CPK3FL	21_07_30	2	-1.80446
CPK3FL	21_07_30	2	-2.03236
CPK3FL	21_07_30	2	0.0600835
CPK3FL	21_07_30	2	0.0406517
CPK3FL	21_07_30	2	-1.74652
CPK3FL	21_07_30	2	-1.40673
CPK3FL	21_07_30	2	-0.956599
CPK3FL	21_07_30	2	-0.47943
CPK3FL	21_07_30	2	0.123965
CPK3FL	21_07_30	2	0.103827
CPK3FL	21_07_30	2	0.112555
CPK3FL	21_07_30	2	0.113293
CPK3FL	21_07_30	2	-0.97502
CPK3FL	21_07_30	2	-0.0967027
CPK3FL	21_07_30	2	-0.0385083
CPK3FL	21_07_30	2	-0.573804
CPK3FL	21_07_30	2	-0.535444
CPK3FL	21_07_30	2	-5
CPK3FL	21_07_30	2	-5
CPK3FL	21_07_30	2	-5
CPK3FL	21_07_30	2	-0.665831
CPK3FL	21_07_30	2	-0.610341
CPK3FL	21_07_30	2	0.220523
CPK3FL	21_07_30	2	-1.29884
CPK3FL	21_07_30	2	-1.83034
CPK3FL	21_07_30	2	-5
CPK3FL	21_07_30	2	-1.17857
CPK3FL	21_07_30	2	-1.23974
CPK3FL	21_07_30	2	-0.313344
CPK3FL	21_07_30	2	-0.66465
CPK3FL	21_07_30	2	-5
CPK3FL	21_07_30	2	-3.25764
CPK3FL	21_07_30	2	-1.0474
CPK3FL	21_07_30	2	-5
CPK3FL	21_07_30	2	-2.17026
CPK3FL	21_07_30	2	-0.819023
CPK3FL	21_07_30	2	-5
CPK3FL	21_07_30	2	-5
CPK3FL	21_07_30	2	-0.768276
CPK3FL	21_07_30	2	-0.566868
CPK3FL	21_07_30	2	-1.38664
CPK3FL	21_07_30	2	-1.70252
CPK3FL	21_07_30	2	-5
CPK3FL	21_07_30	2	-0.128884
CPK3FL	21_07_30	2	-0.191526
CPK3FL	21_07_30	2	-5
CPK3FL	21_07_30	2	-1.22761
CPK3FL	21_07_30	2	-0.6992
CPK3FL	21_07_30	2	-0.693978
CPK3FL	21_07_30	2	-0.37852
CPK3FL	21_07_30	2	-5
CPK3FL	21_07_30	2	-5
CPK3FL	21_07_30	2	-0.0469385
CPK3FL	21_07_30	2	-0.0567662
CPK3FL	21_07_30	2	0.00107381
CPK3FL	21_07_30	2	-0.306243
CPK3FL	21_07_30	2	-1.2638
CPK3FL	21_07_30	2	-0.975924
CPK3FL	21_07_30	2	-2.14118
CPK3FL	21_07_30	2	-1.13556
CPK3FL	21_07_30	2	-5
CPK3FL	21_07_30	2	-5
CPK3FL	21_07_30	2	-5
CPK3FL	21_07_30	2	-1.23484
CPK3FL	21_07_30	2	-5
CPK3FL	21_07_30	2	-5
CPK3FL	21_07_30	2	-5
CPK3FL	21_07_30	2	-0.893266
CPK3FL	21_07_30	2	-0.084427
CPK3FL	21_07_30	2	-0.0559712
CPK3FL	21_07_30	2	-0.486657
CPK3FL	21_07_30	2	-0.374077
CPK3FL	21_07_30	2	-5
CPK3FL	21_07_30	2	-1.67247
CPK3FL	21_07_30	2	-0.421138
CPK3FL	21_07_30	2	-0.521645
CPK3FL	21_07_30	2	-0.421231
CPK3FL	21_07_30	2	-0.702056
CPK3FL	21_07_30	2	0.111245
CPK3FL	21_07_30	2	0.0802481
CPK3FL	21_07_30	2	0.119502
CPK3FL	21_07_30	2	-5
CPK3FL	21_07_30	2	-5
CPK3FL	21_07_30	2	-1.46748
CPK3FL	21_07_30	2	-5
CPK3FL	21_07_30	2	-5
CPK3FL	21_07_30	2	-0.0806666
CPK3FL	21_07_30	2	-0.0757143
CPK3FL	21_07_30	2	-2.03665
CPK3FL	21_07_30	2	-1.48563
CPK3FL	21_07_30	2	-0.821865
CPK3FL	21_07_30	2	-0.987077
CPK3FL	21_07_30	2	-0.838929
CPK3FL	21_07_30	2	-1.61469
CPK3FL	21_07_30	2	-0.569901
CPK3FL	21_07_30	2	-0.534751
CPK3FL	21_07_30	2	-0.246563
CPK3FL	21_07_30	2	-0.173752
CPK3FL	21_07_30	2	-0.129066
CPK3FL	21_07_30	2	-0.158357
CPK3FL	21_07_30	2	-0.186833
CPK3FL	21_07_30	2	-0.203922
CPK3FL	21_07_30	2	-0.142656
CPK3FL	21_07_30	2	-1.205
CPK3FL	21_07_30	2	-0.879506
CPK3FL	21_07_30	2	-0.758657
CPK3FL	21_07_30	2	-0.0632826
CPK3FL	21_07_30	2	-1.20633
CPK3FL	21_07_30	2	-0.156481
CPK3FL	21_07_30	2	-0.176653
CPK3FL	21_07_30	2	-0.155375
CPK3FL	21_07_30	2	-0.132863
CPK3FL	21_07_30	2	-0.0525884
CPK3FL	21_07_30	2	-0.140138
CPK3FL	21_07_30	2	0.459156
CPK3FL	21_07_30	2	-1.28952
CPK3FL	21_07_30	2	-5
CPK3FL	21_07_30	2	-5
CPK3FL	21_07_30	2	-5
CPK3FL	21_07_30	2	-1.60488
CPK3FL	21_07_30	2	-5
CPK3CA	21_10_07	1	-1.43603
CPK3CA	21_10_07	1	-1.04019
CPK3CA	21_10_07	1	-0.623141
CPK3CA	21_10_07	1	-2.70911
CPK3CA	21_10_07	1	-5
CPK3CA	21_10_07	1	-1.32519
CPK3CA	21_10_07	1	-0.349293
CPK3CA	21_10_07	1	-1.41212
CPK3CA	21_10_07	1	-5
CPK3CA	21_10_07	1	-1.52121
CPK3CA	21_10_07	1	-0.581571
CPK3CA	21_10_07	1	-0.487329
CPK3CA	21_10_07	1	-0.50632
CPK3CA	21_10_07	1	-1.6826
CPK3CA	21_10_07	1	-5
CPK3CA	21_10_07	1	-1.48444
CPK3CA	21_10_07	1	-1.60181
CPK3CA	21_10_07	1	-0.859294
CPK3CA	21_10_07	1	-0.878535
CPK3CA	21_10_07	1	-0.999488
CPK3CA	21_10_07	1	-0.901845
CPK3CA	21_10_07	1	-1.48084
CPK3CA	21_10_07	1	-5
CPK3CA	21_10_07	1	-0.774103
CPK3CA	21_10_07	1	-0.510056
CPK3CA	21_10_07	1	-3.35315
CPK3CA	21_10_07	1	-1.91739
CPK3CA	21_10_07	1	-5
CPK3CA	21_10_07	1	-5
CPK3CA	21_10_07	1	-0.566099
CPK3CA	21_10_07	1	-0.373968
CPK3CA	21_10_07	1	-0.718538
[truncated: 28,097 more rows]
