# Supplementary material for: Interdependence of plasma membrane nanoscale dynamics of a kinase and its cognate substrate underlies Arabidopsis response to viral infection
Source: eLife. 2025 May 2;12:RP90309. doi: 10.7554/eLife.90309 (PMC12048157; doi:10.7554/eLife.90309)
Supplement: Figure 3—source data 2. [file elife-90309-fig3-data2.xlsx]

## Sheet: Sheet1
logD	Condition	Cell	experiment	interval	MSD	diff
-2.70911	CPK3CA	1	1	x0	0.000231197	slow
-3.35315	CPK3CA	1	1	x0	0.00045853	slow
-2.76444	CPK3CA	1	1	x0	0.000128732	slow
-2.45047	CPK3CA	1	1	x0	0.013497	slow
-3.13711	CPK3CA	1	1	x0	0.000830219	slow
-2.85782	CPK3CA	1	1	x0	0.000666542	slow
-2.62352	CPK3CA	1	1	x0	0.000692412	slow
-2.87885	CPK3CA	1	1	x0	0.000642135	slow
-3.4867	CPK3CA	1	1	x0	0.000428978	slow
-2.90801	CPK3CA	1	1	x0	0.00113708	slow
-2.12795	CPK3CA	1	1	x0	0.0254228	slow
-2.37984	CPK3CA	1	1	x0	0.000483055	slow
-2.30323	CPK3CA	1	1	x0	0.00016801	slow
-2.85799	CPK3CA	1	1	x0	0.00146921	slow
-2.15035	CPK3CA	1	1	x0	-6.51e-05	slow
-2.03525	CPK3CA	1	1	x0	0.00145733	slow
-2.54625	CPK3CA	1	1	x0	0.00132765	slow
-3.59334	CPK3CA	1	1	x0	0.00162388	slow
-2.25403	CPK3CA	1	1	x0	0.000830939	slow
-3.39829	CPK3CA	1	1	x0	0.0564018	slow
-2.82242	CPK3CA	1	1	x0	0.00152624	slow
-3.12421	CPK3CA	1	1	x0	0.004113	slow
-2.31838	CPK3CA	1	1	x0	0.000888642	slow
-2.79727	CPK3CA	1	1	x0	0.00131348	slow
-2.60795	CPK3CA	1	1	x0	0.000317917	slow
-2.53025	CPK3CA	1	1	x0	0.000366887	slow
-2.82553	CPK3CA	1	1	x0	0.00122188	slow
-2.33325	CPK3CA	1	1	x0	-3.65e-05	slow
-4.52589	CPK3CA	1	1	x0	0.000573839	slow
-2.86582	CPK3CA	1	1	x0	0.000796736	slow
-2.85009	CPK3CA	1	1	x0	0.000632287	slow
-2.20952	CPK3CA	1	1	x0	0.00368293	slow
-2.97588	CPK3CA	1	1	x0	0.00141066	slow
-3.24012	CPK3CA	1	1	x0	4.49e-05	slow
-2.21088	CPK3CA	1	1	x0	0.00279743	slow
-2.76642	CPK3CA	1	1	x0	0.000652	slow
-3.09546	CPK3CA	1	1	x0	0.000916325	slow
-2.10995	CPK3CA	1	1	x0	-0.000106236	slow
-3.5793	CPK3CA	1	1	x0	0.00170065	slow
-2.3058	CPK3CA	1	1	x0	9.32e-05	slow
-3.17619	CPK3CA	1	1	x0	0.000389393	slow
-2.25387	CPK3CA	1	1	x0	0.000940338	slow
-2.16102	CPK3CA	1	1	x0	0.026903	slow
-2.46443	CPK3CA	1	1	x0	0.000497667	slow
-2.52106	CPK3CA	1	1	x0	0.000167229	slow
-2.9404	CPK3CA	1	1	x0	0.000757585	slow
-2.74143	CPK3CA	1	1	x0	0.000530958	slow
-3.23349	CPK3CA	1	1	x0	0.00164521	slow
-2.36304	CPK3CA	1	1	x0	-0.000123908	slow
-2.39317	CPK3CA	1	1	x0	-0.000353771	slow
-3.30348	CPK3CA	1	1	x0	0.00146048	slow
-2.01223	CPK3CA	1	1	x0	0.00543686	slow
-4.17082	CPK3CA	1	1	x0	0.000469845	slow
-2.2725	CPK3CA	1	1	x0	0.000702676	slow
-3.7646	CPK3CA	1	1	x0	0.00118569	slow
-2.22977	CPK3CA	1	1	x0	0.000971008	slow
-2.55549	CPK3CA	1	1	x0	0.000118708	slow
-2.37743	CPK3CA	1	1	x0	-0.000311706	slow
-2.46942	CPK3CA	1	1	x0	-0.000322697	slow
-3.19113	CPK3CA	1	1	x0	0.105369	slow
-3.17007	CPK3CA	1	1	x0	0.00097558	slow
-3.083	CPK3CA	1	1	x0	0.00269574	slow
-2.46326	CPK3CA	1	1	x0	0.0019387	slow
-2.17995	CPK3CA	1	1	x0	0.000248318	slow
-3.40905	CPK3CA	1	1	x0	0.00124705	slow
-2.5119	CPK3CA	1	1	x0	0.000278967	slow
-2.12893	CPK3CA	1	1	x0	0.00279389	slow
-3.10636	CPK3CA	1	1	x0	0.000453717	slow
-2.71194	CPK3CA	1	1	x0	0.00318389	slow
-3.09934	CPK3CA	1	1	x0	0.00160569	slow
-2.02897	CPK3CA	1	1	x0	0.0125527	slow
-3.00488	CPK3CA	1	1	x0	0.000111113	slow
-2.17296	CPK3CA	1	1	x0	0.00424765	slow
-2.24697	CPK3CA	1	1	x0	0.0255473	slow
-2.22979	CPK3CA	1	1	x0	0.0769511	slow
-4.28603	CPK3CA	1	1	x0	0.000771505	slow
-2.03615	CPK3CA	1	1	x0	0.0598174	slow
-2.51706	CPK3CA	1	1	x0	0.00173135	slow
-2.27047	CPK3CA	1	1	x0	0.000142496	slow
-2.36537	CPK3CA	1	1	x0	0.00822831	slow
-2.52371	CPK3CA	1	1	x0	0.000308249	slow
-2.26128	CPK3CA	1	1	x0	0.00358006	slow
-2.0465	CPK3CA	1	1	x0	0.026399	slow
-4.03408	CPK3CA	1	1	x0	0.000965503	slow
-3.73231	CPK3CA	1	1	x0	0.00217317	slow
-2.35495	CPK3CA	1	1	x0	0.000826325	slow
-2.89297	CPK3CA	1	1	x0	0.117824	slow
-2.62676	CPK3CA	1	1	x0	0.0755536	slow
-2.70332	CPK3CA	1	1	x0	0.00276944	slow
-2.64154	CPK3CA	1	1	x0	0.00129504	slow
-2.01604	CPK3CA	1	1	x0	0.00149532	slow
-2.07457	CPK3CA	1	1	x0	0.000426448	slow
-2.12466	CPK3CA	1	1	x0	0.0270526	slow
-2.3488	CPK3CA	1	1	x0	0.00132899	slow
-2.00727	CPK3CA	1	1	x0	0.000585516	slow
-2.56434	CPK3CA	1	1	x0	0.000902399	slow
-2.4032	CPK3CA	1	1	x0	0.0028995	slow
-3.35798	CPK3CA	1	1	x0	0.00269256	slow
-2.13482	CPK3CA	1	1	x0	-0.000555932	slow
-2.05854	CPK3CA	1	1	x0	0.00226394	slow
-2.16755	CPK3CA	1	1	x0	0.0690618	slow
-3.37254	CPK3CA	1	1	x0	0.00825664	slow
-2.06497	CPK3CA	1	1	x0	0.00764609	slow
-2.75739	CPK3CA	1	1	x0	0.000815738	slow
-2.44807	CPK3CA	1	1	x0	0.000646629	slow
-2.22251	CPK3CA	1	1	x0	0.000486394	slow
-4.27971	CPK3CA	1	1	x0	0.00101441	slow
-2.29087	CPK3CA	1	1	x0	0.000284852	slow
-2.38517	CPK3CA	1	1	x0	-0.000443278	slow
-2.46394	CPK3CA	1	1	x0	0.00112526	slow
-2.91405	CPK3CA	1	1	x0	0.00393736	slow
-2.09083	CPK3CA	1	1	x0	0.000960741	slow
-2.22152	CPK3CA	1	1	x0	0.0147542	slow
-2.59182	CPK3CA	1	1	x0	-0.000185897	slow
-2.02461	CPK3CA	1	1	x0	0.00449041	slow
-3.14132	CPK3CA	1	1	x0	0.00128484	slow
-2.09379	CPK3CA	1	1	x0	0.00991512	slow
-2.8649	CPK3CA	1	1	x0	0.000795503	slow
-2.65864	CPK3CA	1	1	x0	0.00103175	slow
-3.17954	CPK3CA	1	1	x0	0.000631535	slow
-2.74727	CPK3CA	1	1	x0	0.00097167	slow
-3.48748	CPK3CA	1	1	x0	0.000924186	slow
-2.20132	CPK3CA	1	1	x0	0.00239947	slow
-2.44303	CPK3CA	1	1	x0	0.000173171	slow
-2.53942	CPK3CA	1	1	x0	0.00116089	slow
-2.49863	CPK3CA	1	1	x0	0.000723361	slow
-3.75078	CPK3CA	1	1	x0	0.00256368	slow
-2.28303	CPK3CA	1	1	x0	-7.07e-06	slow
-2.01451	CPK3CA	1	1	x0	-0.000226858	slow
-2.17777	CPK3CA	1	1	x0	-0.000144723	slow
-3.68386	CPK3CA	1	1	x0	0.000811365	slow
-3.6366	CPK3CA	1	1	x0	0.000592071	slow
-3.02269	CPK3CA	1	1	x0	0.00142087	slow
-2.83335	CPK3CA	1	1	x0	0.00115609	slow
-2.798	CPK3CA	1	1	x0	0.000457477	slow
-3.05158	CPK3CA	1	1	x0	0.0017306	slow
-2.39374	CPK3CA	1	1	x0	0.000987794	slow
-2.43034	CPK3CA	1	1	x0	0.0259854	slow
-2.69595	CPK3CA	1	1	x0	0.000410165	slow
-2.44375	CPK3CA	1	1	x0	0.000889905	slow
-2.89058	CPK3CA	1	1	x0	0.061298	slow
-2.38774	CPK3CA	1	1	x0	0.000427383	slow
-2.38755	CPK3CA	1	1	x0	0.00950347	slow
-2.03246	CPK3CA	1	1	x0	-8.52e-05	slow
-2.35627	CPK3CA	1	1	x0	0.000790784	slow
-2.37713	CPK3CA	1	1	x0	0.00255468	slow
-2.5304	CPK3CA	1	1	x0	0.000648808	slow
-2.20485	CPK3CA	1	1	x0	0.000743314	slow
-2.99088	CPK3CA	1	1	x0	0.000804191	slow
-2.45611	CPK3CA	1	1	x0	0.000178842	slow
-2.76787	CPK3CA	1	1	x0	0.00201482	slow
-2.59071	CPK3CA	1	1	x0	0.000935224	slow
-2.37488	CPK3CA	1	1	x0	0.000579476	slow
-2.29261	CPK3CA	4	1	x0	0.00320626	slow
-2.57196	CPK3CA	4	1	x0	0.000440384	slow
-3.43814	CPK3CA	4	1	x0	0.00018255	slow
-2.94581	CPK3CA	4	1	x0	0.00324656	slow
-2.06104	CPK3CA	4	1	x0	0.000716561	slow
-3.10788	CPK3CA	4	1	x0	0.00256601	slow
-2.48869	CPK3CA	4	1	x0	0.0010218	slow
-2.74764	CPK3CA	4	1	x0	0.00140796	slow
-2.20888	CPK3CA	4	1	x0	0.000861239	slow
-2.44554	CPK3CA	4	1	x0	0.0165207	slow
-3.0673	CPK3CA	4	1	x0	0.00063243	slow
-2.95453	CPK3CA	4	1	x0	0.000661368	slow
-2.07697	CPK3CA	4	1	x0	0.00961	slow
-2.15241	CPK3CA	4	1	x0	-0.000236719	slow
-2.32554	CPK3CA	4	1	x0	8.92e-05	slow
-2.07519	CPK3CA	4	1	x0	0.000309086	slow
-3.49464	CPK3CA	4	1	x0	0.000441619	slow
-2.49219	CPK3CA	4	1	x0	0.00382265	slow
-3.03186	CPK3CA	4	1	x0	0.0966853	slow
-2.76722	CPK3CA	4	1	x0	0.000918805	slow
-3.15754	CPK3CA	4	1	x0	0.000638564	slow
-2.96538	CPK3CA	4	1	x0	0.00111198	slow
-3.28404	CPK3CA	4	1	x0	0.000470486	slow
-2.32088	CPK3CA	4	1	x0	0.00041919	slow
-2.32887	CPK3CA	4	1	x0	0.000762448	slow
-2.65329	CPK3CA	4	1	x0	-1.11e-05	slow
-3.47707	CPK3CA	4	1	x0	0.00111613	slow
-2.30892	CPK3CA	4	1	x0	0.000737426	slow
-2.7288	CPK3CA	4	1	x0	0.00116151	slow
-2.77236	CPK3CA	4	1	x0	0.00170621	slow
-2.6261	CPK3CA	4	1	x0	0.000695603	slow
-2.51182	CPK3CA	4	1	x0	0.00173447	slow
-2.34185	CPK3CA	4	1	x0	0.000857787	slow
-2.0908	CPK3CA	4	1	x0	0.00133878	slow
-2.88975	CPK3CA	4	1	x0	0.000359921	slow
-2.91008	CPK3CA	4	1	x0	0.000644142	slow
-2.49825	CPK3CA	4	1	x0	0.000391319	slow
-2.73394	CPK3CA	4	1	x0	0.000663506	slow
-2.70857	CPK3CA	4	1	x0	0.00171829	slow
-2.07632	CPK3CA	4	1	x0	0.000416381	slow
-2.438	CPK3CA	4	1	x0	0.0644204	slow
-4.18651	CPK3CA	4	1	x0	0.00137012	slow
-2.67538	CPK3CA	4	1	x0	0.00121741	slow
-2.98059	CPK3CA	4	1	x0	0.000640732	slow
-2.51344	CPK3CA	4	1	x0	0.000526166	slow
-3.85694	CPK3CA	4	1	x0	0.0012929	slow
-3.49888	CPK3CA	4	1	x0	0.000292245	slow
-3.06735	CPK3CA	4	1	x0	0.0013954	slow
-2.61908	CPK3CA	4	1	x0	0.00289179	slow
-2.82077	CPK3CA	4	1	x0	2.91e-05	slow
-2.97557	CPK3CA	4	1	x0	0.000753936	slow
-2.72342	CPK3CA	4	1	x0	0.175617	slow
-2.31069	CPK3CA	4	1	x0	0.00669433	slow
-2.94196	CPK3CA	4	1	x0	0.00293811	slow
-2.1647	CPK3CA	4	1	x0	-0.000400242	slow
-2.46429	CPK3CA	4	1	x0	0.00065394	slow
-2.71851	CPK3CA	4	1	x0	0.000547509	slow
-2.35552	CPK3CA	4	1	x0	0.000554516	slow
-2.47378	CPK3CA	4	1	x0	0.00158339	slow
-2.69616	CPK3CA	4	1	x0	0.00254277	slow
-2.27362	CPK3CA	4	1	x0	-7.35e-05	slow
-2.01793	CPK3CA	4	1	x0	0.000237895	slow
-3.07754	CPK3CA	4	1	x0	0.000891545	slow
-2.48441	CPK3CA	4	1	x0	0.00077611	slow
-2.19233	CPK3CA	4	1	x0	-0.000236593	slow
-4.42357	CPK3CA	4	1	x0	0.00134452	slow
-2.17319	CPK3CA	4	1	x0	0.0006116	slow
-2.93252	CPK3CA	4	1	x0	0.00120503	slow
-2.03475	CPK3CA	4	1	x0	0.0021683	slow
-2.65863	CPK3CA	4	1	x0	0.00179064	slow
-2.72879	CPK3CA	4	1	x0	0.000178052	slow
-2.59729	CPK3CA	4	1	x0	0.0538013	slow
-3.28706	CPK3CA	4	1	x0	0.0038935	slow
-3.73019	CPK3CA	4	1	x0	0.00410479	slow
-2.74486	CPK3CA	4	1	x0	0.00102615	slow
-2.01819	CPK3CA	4	1	x0	0.00256745	slow
-2.10891	CPK3CA	4	1	x0	0.000320158	slow
-2.4804	CPK3CA	4	1	x0	0.00121098	slow
-2.3589	CPK3CA	4	1	x0	0.00151381	slow
-2.96677	CPK3CA	4	1	x0	0.00230629	slow
-2.27306	CPK3CA	4	1	x0	0.0125684	slow
-3.13312	CPK3CA	4	1	x0	0.00160023	slow
-2.57719	CPK3CA	4	1	x0	0.0016397	slow
-3.04623	CPK3CA	4	1	x0	0.000508765	slow
-2.55514	CPK3CA	4	1	x0	0.00222346	slow
-2.3078	CPK3CA	4	1	x0	-0.000339881	slow
-3.36114	CPK3CA	4	1	x0	0.00134912	slow
-2.86067	CPK3CA	4	1	x0	0.00131199	slow
-2.14321	CPK3CA	4	1	x0	0.00835782	slow
-2.50398	CPK3CA	4	1	x0	0.000386558	slow
-2.33817	CPK3CA	4	1	x0	0.00673278	slow
-3.34784	CPK3CA	4	1	x0	0.00185731	slow
-3.54798	CPK3CA	4	1	x0	0.00132765	slow
-2.80469	CPK3CA	4	1	x0	0.00216787	slow
-2.20579	CPK3CA	4	1	x0	0.130515	slow
-2.86546	CPK3CA	4	1	x0	0.000596045	slow
-2.45589	CPK3CA	4	1	x0	0.000714911	slow
-2.42844	CPK3CA	4	1	x0	0.00143649	slow
-2.70259	CPK3CA	4	1	x0	0.00123185	slow
-2.09955	CPK3CA	4	1	x0	0.00112875	slow
-3.25251	CPK3CA	4	1	x0	0.000995971	slow
-3.20656	CPK3CA	4	1	x0	0.00266298	slow
-2.74003	CPK3CA	4	1	x0	0.000480572	slow
-2.03719	CPK3CA	4	1	x0	0.00162798	slow
-2.22437	CPK3CA	4	1	x0	0.00162861	slow
-2.45468	CPK3CA	4	1	x0	0.00219526	slow
-2.77239	CPK3CA	4	1	x0	0.00320955	slow
-2.86458	CPK3CA	4	1	x0	0.00109473	slow
-2.61225	CPK3CA	4	1	x0	0.000248919	slow
-2.8045	CPK3CA	4	1	x0	0.00229552	slow
-2.39242	CPK3CA	4	1	x0	0.00106852	slow
-2.76616	CPK3CA	4	1	x0	0.000853066	slow
-2.01949	CPK3CA	4	1	x0	0.00172419	slow
-2.00295	CPK3CA	4	1	x0	0.013057	slow
-2.62073	CPK3CA	4	1	x0	0.00117178	slow
-2.39345	CPK3CA	4	1	x0	-7.17e-05	slow
-2.41783	CPK3CA	4	1	x0	0.00410401	slow
-2.70436	CPK3CA	4	1	x0	0.000245951	slow
-2.74534	CPK3CA	4	1	x0	0.00118059	slow
-4.21759	CPK3CA	4	1	x0	0.00109139	slow
-3.15873	CPK3CA	4	1	x0	0.00144211	slow
-2.45453	CPK3CA	4	1	x0	0.0127526	slow
-2.12579	CPK3CA	4	1	x0	0.00395717	slow
-2.04963	CPK3CA	4	1	x0	0.0306601	slow
-2.22209	CPK3CA	4	1	x0	-0.000326571	slow
-3.51667	CPK3CA	4	1	x0	0.000593041	slow
-2.60053	CPK3CA	4	1	x0	0.00160575	slow
-2.26724	CPK3CA	4	1	x0	0.00594786	slow
-2.41498	CPK3CA	4	1	x0	-0.000260846	slow
-2.25443	CPK3CA	4	1	x0	0.00512539	slow
-2.07949	CPK3CA	4	1	x0	-0.00133237	slow
-2.98672	CPK3CA	4	1	x0	0.00159227	slow
-2.15531	CPK3CA	4	1	x0	0.000635212	slow
-2.02006	CPK3CA	4	1	x0	0.00103842	slow
-3.26517	CPK3CA	4	1	x0	0.00199121	slow
-2.78141	CPK3CA	4	1	x0	0.00133023	slow
-2.50241	CPK3CA	4	1	x0	0.000815946	slow
-3.89241	CPK3CA	4	1	x0	0.00128085	slow
-3.04721	CPK3CA	4	1	x0	0.000307475	slow
-2.51232	CPK3CA	4	1	x0	0.00152958	slow
-3.49668	CPK3CA	4	1	x0	0.00096156	slow
-2.07945	CPK3CA	4	1	x0	0.00182716	slow
-2.36252	CPK3CA	4	1	x0	0.000525547	slow
-3.48861	CPK3CA	4	1	x0	0.000808017	slow
-2.82607	CPK3CA	4	1	x0	0.00150746	slow
-3.04839	CPK3CA	4	1	x0	0.000649904	slow
-3.52428	CPK3CA	4	1	x0	0.00117648	slow
-2.64949	CPK3CA	4	1	x0	0.00109994	slow
-2.33192	CPK3CA	4	1	x0	0.000209422	slow
-2.05059	CPK3CA	4	1	x0	-0.00119208	slow
-2.05616	CPK3CA	4	1	x0	0.000815509	slow
-2.6657	CPK3CA	4	1	x0	0.0030911	slow
-3.2145	CPK3CA	4	1	x0	0.00355027	slow
-2.75995	CPK3CA	4	1	x0	0.00200648	slow
-2.03333	CPK3CA	4	1	x0	-0.000109131	slow
-2.71404	CPK3CA	4	1	x0	0.219882	slow
-2.96594	CPK3CA	4	1	x0	0.0010574	slow
-2.13678	CPK3CA	4	1	x0	0.00431525	slow
-3.00858	CPK3CA	4	1	x0	0.00146614	slow
-2.79888	CPK3CA	4	1	x0	0.00119719	slow
-2.30626	CPK3CA	4	1	x0	0.000617998	slow
-3.98409	CPK3CA	4	1	x0	0.000678187	slow
-2.06676	CPK3CA	4	1	x0	0.0123777	slow
-2.97206	CPK3CA	4	1	x0	0.0161104	slow
-2.06953	CPK3CA	4	1	x0	-0.000740867	slow
-2.67188	CPK3CA	4	1	x0	0.000373053	slow
-4.32248	CPK3CA	4	1	x0	0.00217583	slow
-3.45169	CPK3CA	4	1	x0	0.000684246	slow
-3.65647	CPK3CA	4	1	x0	0.000904097	slow
-2.7918	CPK3CA	4	1	x0	0.00217498	slow
-2.63726	CPK3CA	4	1	x0	0.00453489	slow
-2.57121	CPK3CA	4	1	x0	0.000993096	slow
-2.738	CPK3CA	4	1	x0	0.000648249	slow
-2.73246	CPK3CA	4	1	x0	0.000538855	slow
-4.84799	CPK3CA	4	1	x0	0.00121688	slow
-2.27901	CPK3CA	4	1	x0	0.0013899	slow
-3.62697	CPK3CA	4	1	x0	0.00185816	slow
-2.89918	CPK3CA	4	1	x0	0.000463933	slow
-3.05455	CPK3CA	4	1	x0	0.000660698	slow
-2.47049	CPK3CA	4	1	x0	0.00308037	slow
-2.17264	CPK3CA	4	1	x0	-0.0017314	slow
-2.47076	CPK3CA	4	1	x0	0.00222272	slow
-2.59147	CPK3CA	4	1	x0	0.000313831	slow
-2.0063	CPK3CA	4	1	x0	0.00127601	slow
-2.51784	CPK3CA	4	1	x0	0.000365283	slow
-3.22155	CPK3CA	4	1	x0	0.0563286	slow
-2.41109	CPK3CA	4	1	x0	0.00213882	slow
-2.52911	CPK3CA	4	1	x0	0.00145009	slow
-3.39074	CPK3CA	4	1	x0	0.000297394	slow
-3.04543	CPK3CA	4	1	x0	0.00173326	slow
-3.63473	CPK3CA	4	1	x0	0.000897169	slow
-2.81564	CPK3CA	4	1	x0	0.000210566	slow
-2.78589	CPK3CA	4	1	x0	0.00227823	slow
-4.12157	CPK3CA	4	1	x0	0.000949797	slow
-2.11154	CPK3CA	4	1	x0	0.00521491	slow
-3.05532	CPK3CA	4	1	x0	0.00110157	slow
-3.02113	CPK3CA	4	1	x0	0.000950533	slow
-2.98944	CPK3CA	4	1	x0	0.000471559	slow
-2.68497	CPK3CA	4	1	x0	0.00072028	slow
-2.73995	CPK3CA	4	1	x0	0.000531287	slow
-3.66589	CPK3CA	4	1	x0	0.00109542	slow
-2.14865	CPK3CA	4	1	x0	0.000807895	slow
-2.20034	CPK3CA	4	1	x0	-2.36e-06	slow
-3.59155	CPK3CA	4	1	x0	0.000622002	slow
-2.59687	CPK3CA	4	1	x0	0.00045819	slow
-2.54256	CPK3CA	4	1	x0	0.028514	slow
-2.30236	CPK3CA	4	1	x0	0.00559172	slow
-2.07094	CPK3CA	4	1	x0	0.00174041	slow
-2.70345	CPK3CA	4	1	x0	0.00185229	slow
-2.58865	CPK3CA	4	1	x0	0.000615746	slow
-2.55279	CPK3CA	4	1	x0	0.000588595	slow
-3.8208	CPK3CA	4	1	x0	0.00111426	slow
-2.73397	CPK3CA	4	1	x0	0.00125358	slow
-2.44864	CPK3CA	4	1	x0	-0.000649287	slow
-3.41855	CPK3CA	4	1	x0	0.000552186	slow
-3.34658	CPK3CA	4	1	x0	0.000904242	slow
-2.63905	CPK3CA	4	1	x0	0.00433918	slow
-2.2685	CPK3CA	4	1	x0	0.00146909	slow
-2.98096	CPK3CA	4	1	x0	0.00120791	slow
-2.72952	CPK3CA	4	1	x0	0.00176816	slow
-2.03462	CPK3CA	4	1	x0	0.0130219	slow
-2.73604	CPK3CA	4	1	x0	0.00303624	slow
-2.04496	CPK3CA	4	1	x0	0.0027876	slow
-2.65314	CPK3CA	4	1	x0	0.000360527	slow
-2.30853	CPK3CA	4	1	x0	0.0865746	slow
-2.79242	CPK3CA	4	1	x0	0.000787006	slow
-3.86712	CPK3CA	4	1	x0	0.00115613	slow
-2.54031	CPK3CA	4	1	x0	0.000291939	slow
-2.1147	CPK3CA	4	1	x0	0.0040942	slow
-2.91071	CPK3CA	4	1	x0	0.0156602	slow
-3.39958	CPK3CA	4	1	x0	0.00191933	slow
-3.33154	CPK3CA	4	1	x0	0.0011429	slow
-3.15235	CPK3CA	4	1	x0	0.00121423	slow
-2.59145	CPK3CA	4	1	x0	0.00377864	slow
-3.1656	CPK3CA	4	1	x0	0.00185365	slow
-2.11058	CPK3CA	4	1	x0	0.00038534	slow
-2.25901	CPK3CA	4	1	x0	0.00132339	slow
-2.15579	CPK3CA	4	1	x0	0.00672688	slow
-2.30666	CPK3CA	4	1	x0	0.00041047	slow
-2.17929	CPK3CA	4	1	x0	0.147475	slow
-2.29401	CPK3CA	4	1	x0	0.00215856	slow
-3.46646	CPK3CA	4	1	x0	0.0007101	slow
-2.22577	CPK3CA	4	1	x0	0.00240566	slow
-2.05716	CPK3CA	4	1	x0	-0.000142429	slow
-3.48519	CPK3CA	4	1	x0	0.00137932	slow
-3.47092	CPK3CA	4	1	x0	0.000806894	slow
-2.42452	CPK3CA	4	1	x0	0.00202877	slow
-2.09252	CPK3CA	4	1	x0	-0.00170935	slow
-2.35993	CPK3CA	4	1	x0	0.000379873	slow
-2.66331	CPK3CA	4	1	x0	0.00140193	slow
-3.22087	CPK3CA	4	1	x0	0.000967963	slow
-2.41688	CPK3CA	4	1	x0	0.00261886	slow
-2.09739	CPK3CA	4	1	x0	-0.002122	slow
-2.25306	CPK3CA	4	1	x0	0.00344525	slow
-3.23667	CPK3CA	4	1	x0	0.000809135	slow
-2.30297	CPK3CA	4	1	x0	0.00112358	slow
-3.25174	CPK3CA	4	1	x0	0.000614518	slow
-2.78251	CPK3CA	4	1	x0	0.0012397	slow
-2.93349	CPK3CA	4	1	x0	0.00242524	slow
-2.68849	CPK3CA	4	1	x0	0.00125781	slow
-3.06611	CPK3CA	4	1	x0	0.000593866	slow
-3.12654	CPK3CA	4	1	x0	0.000371381	slow
-2.76728	CPK3CA	4	1	x0	0.000942032	slow
-2.34296	CPK3CA	4	1	x0	0.00678664	slow
-3.24108	CPK3CA	4	1	x0	0.00336458	slow
-3.01638	CPK3CA	4	1	x0	0.000666718	slow
-2.48334	CPK3CA	4	1	x0	0.00166602	slow
-2.15478	CPK3CA	4	1	x0	-0.000293452	slow
-2.77871	CPK3CA	4	1	x0	0.00134492	slow
-3.57417	CPK3CA	4	1	x0	0.000859594	slow
-2.81638	CPK3CA	4	1	x0	0.00184015	slow
-3.35168	CPK3CA	4	1	x0	0.000661853	slow
-2.32556	CPK3CA	4	1	x0	0.000656931	slow
-2.69433	CPK3CA	4	1	x0	0.00229287	slow
-2.98499	CPK3CA	4	1	x0	0.00084529	slow
-2.6328	CPK3CA	4	1	x0	0.000904161	slow
-2.97112	CPK3CA	4	1	x0	0.000990541	slow
-3.97184	CPK3CA	4	1	x0	0.00133632	slow
-3.33643	CPK3CA	4	1	x0	0.000459471	slow
-2.11402	CPK3CA	4	1	x0	0.000131682	slow
-2.12378	CPK3CA	4	1	x0	0.000883053	slow
-3.00306	CPK3CA	4	1	x0	0.00157929	slow
-2.48321	CPK3CA	4	1	x0	0.00240922	slow
-2.59475	CPK3CA	4	1	x0	0.000821688	slow
-2.71813	CPK3CA	4	1	x0	0.000934108	slow
-2.77502	CPK3CA	4	1	x0	0.0314113	slow
-2.77532	CPK3CA	4	1	x0	0.00148539	slow
-3.61454	CPK3CA	4	1	x0	0.000748896	slow
-2.65208	CPK3CA	4	1	x0	0.00202296	slow
-3.69041	CPK3CA	4	1	x0	0.00261952	slow
-2.81511	CPK3CA	4	1	x0	0.0030072	slow
-2.75031	CPK3CA	4	1	x0	0.00157344	slow
-3.253	CPK3CA	4	1	x0	0.00513214	slow
-2.69588	CPK3CA	4	1	x0	0.000900061	slow
-2.79867	CPK3CA	4	1	x0	0.000444913	slow
-3.0348	CPK3CA	4	1	x0	0.00130311	slow
-3.44065	CPK3CA	4	1	x0	0.00181611	slow
-3.35089	CPK3CA	4	1	x0	0.00127003	slow
-2.64532	CPK3CA	4	1	x0	0.00351822	slow
-3.91849	CPK3CA	4	1	x0	0.00192837	slow
-3.06844	CPK3CA	4	1	x0	0.00120402	slow
-2.40144	CPK3CA	4	1	x0	0.000906771	slow
-2.14621	CPK3CA	4	1	x0	0.00373034	slow
-2.91681	CPK3CA	4	1	x0	0.00351238	slow
-2.4181	CPK3CA	4	1	x0	0.000965765	slow
-2.60423	CPK3CA	4	1	x0	0.0010431	slow
-2.08154	CPK3CA	4	1	x0	-0.000184568	slow
-2.75368	CPK3CA	4	1	x0	0.00182906	slow
-3.36613	CPK3CA	4	1	x0	0.00290667	slow
-2.39634	CPK3CA	4	1	x0	0.00138847	slow
-3.96524	CPK3CA	4	1	x0	0.000821907	slow
-4.73529	CPK3CA	4	1	x0	0.00138399	slow
-2.75907	CPK3CA	4	1	x0	0.000394414	slow
-2.36106	CPK3CA	4	1	x0	0.00294362	slow
-2.65671	CPK3CA	4	1	x0	0.00230318	slow
-2.64465	CPK3CA	4	1	x0	0.000660765	slow
-3.14542	CPK3CA	4	1	x0	0.00112075	slow
-2.79013	CPK3CA	4	1	x0	0.00255366	slow
-3.24362	CPK3CA	4	1	x0	0.0180045	slow
-3.12957	CPK3CA	4	1	x0	0.00108072	slow
-3.16328	CPK3CA	4	1	x0	0.000402908	slow
-3.55429	CPK3CA	4	1	x0	0.00112611	slow
-2.09204	CPK3CA	4	1	x0	0.00820536	slow
-2.85812	CPK3CA	4	1	x0	0.00150415	slow
-3.16167	CPK3CA	4	1	x0	0.00156182	slow
-2.36831	CPK3CA	4	1	x0	0.00292205	slow
-3.30279	CPK3CA	4	1	x0	0.00231682	slow
-2.27364	CPK3CA	4	1	x0	0.00394825	slow
-2.7	CPK3CA	4	1	x0	0.00183421	slow
-2.45192	CPK3CA	4	1	x0	0.000383161	slow
-3.58373	CPK3CA	4	1	x0	0.0012396	slow
-3.04357	CPK3CA	4	1	x0	0.000640712	slow
-3.21562	CPK3CA	4	1	x0	0.00131547	slow
-2.87231	CPK3CA	4	1	x0	0.000496087	slow
-2.83324	CPK3CA	4	1	x0	0.000450635	slow
-3.25103	CPK3CA	4	1	x0	0.000782794	slow
-3.42068	CPK3CA	4	1	x0	0.000464837	slow
-3.48574	CPK3CA	4	1	x0	0.00133295	slow
-4.88638	CPK3CA	4	1	x0	0.00220206	slow
-2.72932	CPK3CA	4	1	x0	3.42e-05	slow
-2.85042	CPK3CA	4	1	x0	0.000364315	slow
-2.53368	CPK3CA	4	1	x0	0.00128301	slow
-2.94229	CPK3CA	4	1	x0	0.018754	slow
-2.85789	CPK3CA	4	1	x0	0.00144085	slow
-3.47115	CPK3CA	4	1	x0	0.00175392	slow
-2.34491	CPK3CA	4	1	x0	0.000845759	slow
-2.41659	CPK3CA	4	1	x0	0.00978887	slow
-3.10144	CPK3CA	4	1	x0	0.000369018	slow
-2.30887	CPK3CA	4	1	x0	0.000599611	slow
-3.79457	CPK3CA	4	1	x0	0.00115528	slow
-2.57078	CPK3CA	4	1	x0	0.00086631	slow
-2.71	CPK3CA	4	1	x0	0.000670362	slow
-2.85213	CPK3CA	4	1	x0	0.000578116	slow
-3.06436	CPK3CA	4	1	x0	0.0010037	slow
-2.43163	CPK3CA	4	1	x0	7.33e-07	slow
-3.1472	CPK3CA	4	1	x0	0.00201595	slow
-2.81731	CPK3CA	4	1	x0	0.00194469	slow
-2.40022	CPK3CA	4	1	x0	-1.5e-05	slow
-2.82077	CPK3CA	4	1	x0	0.000629426	slow
-2.13435	CPK3CA	4	1	x0	0.000224947	slow
-2.67188	CPK3CA	4	1	x0	0.00134668	slow
-2.78619	CPK3CA	4	1	x0	0.00236121	slow
-3.29881	CPK3CA	4	1	x0	0.000904987	slow
-3.05036	CPK3CA	4	1	x0	0.00110586	slow
-2.55808	CPK3CA	4	1	x0	0.000810089	slow
-2.59489	CPK3CA	4	1	x0	0.000692482	slow
-4.50285	CPK3CA	4	1	x0	0.000755791	slow
-2.77754	CPK3CA	4	1	x0	0.000937912	slow
-2.79788	CPK3CA	4	1	x0	0.00163738	slow
-2.91899	CPK3CA	4	1	x0	0.00125744	slow
-2.65028	CPK3CA	4	1	x0	-0.000411517	slow
-3.85407	CPK3CA	4	1	x0	0.00272769	slow
-2.76893	CPK3CA	4	1	x0	0.0020399	slow
-2.70929	CPK3CA	4	1	x0	0.00398629	slow
-3.65159	CPK3CA	4	1	x0	0.00225659	slow
-2.85568	CPK3CA	4	1	x0	0.00273304	slow
-2.04567	CPK3CA	4	1	x0	-4.96e-05	slow
-3.17609	CPK3CA	4	1	x0	0.00179777	slow
-2.47553	CPK3CA	4	1	x0	0.000641377	slow
-2.77023	CPK3CA	4	1	x0	0.000347371	slow
-3.28842	CPK3CA	4	1	x0	0.00109653	slow
-2.48751	CPK3CA	4	1	x0	0.00143615	slow
-2.84067	CPK3CA	4	1	x0	0.000801282	slow
-2.76839	CPK3CA	4	1	x0	4.42e-05	slow
-3.06249	CPK3CA	4	1	x0	0.000808331	slow
-2.52035	CPK3CA	4	1	x0	-3.34e-05	slow
-2.89105	CPK3CA	4	1	x0	0.00134529	slow
-2.7247	CPK3CA	4	1	x0	0.00261205	slow
-2.36796	CPK3CA	4	1	x0	-0.000972152	slow
-2.04736	CPK3CA	4	1	x0	-0.000220249	slow
-2.34001	CPK3CA	4	1	x0	0.00051702	slow
-2.81898	CPK3CA	4	1	x0	0.000803868	slow
-2.55735	CPK3CA	4	1	x0	0.000528786	slow
-2.82692	CPK3CA	4	1	x0	6.58e-05	slow
-2.56447	CPK3CA	4	1	x0	0.000128538	slow
-2.48485	CPK3CA	4	1	x0	0.00165774	slow
-2.48985	CPK3CA	4	1	x0	0.00239976	slow
-3.14798	CPK3CA	4	1	x0	0.000479435	slow
-2.69499	CPK3CA	4	1	x0	0.000600581	slow
-2.60675	CPK3CA	4	1	x0	0.00037917	slow
-2.96977	CPK3CA	4	1	x0	0.00316699	slow
-3.13146	CPK3CA	4	1	x0	0.00112592	slow
-3.7681	CPK3CA	4	1	x0	0.000927422	slow
-3.13064	CPK3CA	4	1	x0	0.000687723	slow
-2.41186	CPK3CA	4	1	x0	0.00143353	slow
-3.57424	CPK3CA	4	1	x0	0.000676251	slow
-3.11126	CPK3CA	4	1	x0	0.000721881	slow
-2.45917	CPK3CA	4	1	x0	-0.000107903	slow
-2.13197	CPK3CA	4	1	x0	-0.00106844	slow
-2.79596	CPK3CA	4	1	x0	0.000981482	slow
-2.84174	CPK3CA	4	1	x0	0.000597411	slow
-2.67921	CPK3CA	4	1	x0	0.000858332	slow
-3.04057	CPK3CA	4	1	x0	0.000360922	slow
-2.61227	CPK3CA	4	1	x0	-0.000206192	slow
-2.74459	CPK3CA	4	1	x0	0.0122891	slow
-2.24274	CPK3CA	4	1	x0	0.0148504	slow
-3.21747	CPK3CA	4	1	x0	0.000719903	slow
-2.9225	CPK3CA	4	1	x0	0.000417896	slow
-2.20503	CPK3CA	4	1	x0	0.00101789	slow
-2.91541	CPK3CA	4	1	x0	0.00158779	slow
-2.76301	CPK3CA	4	1	x0	0.00266895	slow
-2.74033	CPK3CA	4	1	x0	0.000278929	slow
-2.65988	CPK3CA	4	1	x0	0.00228858	slow
-2.28237	CPK3CA	4	1	x0	-0.000127316	slow
-2.48254	CPK3CA	4	1	x0	0.00157857	slow
-3.76795	CPK3CA	4	1	x0	0.00162936	slow
-2.98388	CPK3CA	4	1	x0	0.00101308	slow
-4.13378	CPK3CA	4	1	x0	0.00186424	slow
-3.81019	CPK3CA	4	1	x0	0.000628814	slow
-2.40893	CPK3CA	4	1	x0	0.00237782	slow
-2.78246	CPK3CA	4	1	x0	0.00035537	slow
-3.99634	CPK3CA	4	1	x0	0.0038056	slow
-3.89809	CPK3CA	4	1	x0	0.000987673	slow
-3.23433	CPK3CA	4	1	x0	0.0010565	slow
-2.77912	CPK3CA	4	1	x0	0.00130498	slow
-2.34425	CPK3CA	4	1	x0	0.00138433	slow
-2.57007	CPK3CA	4	1	x0	0.000495402	slow
-2.71723	CPK3CA	4	1	x0	0.00115104	slow
-2.29579	CPK3CA	4	1	x0	0.00125956	slow
-2.20806	CPK3CA	4	1	x0	0.000368808	slow
-2.33525	CPK3CA	4	1	x0	0.00025717	slow
-2.76992	CPK3CA	4	1	x0	0.000244735	slow
-2.71179	CPK3CA	4	1	x0	0.00022194	slow
-2.48377	CPK3CA	4	1	x0	0.000660203	slow
-3.13359	CPK3CA	4	1	x0	0.00145561	slow
-3.4621	CPK3CA	4	1	x0	0.00108872	slow
-2.77375	CPK3CA	4	1	x0	0.000249652	slow
-2.7016	CPK3CA	4	1	x0	0.00216672	slow
-3.7296	CPK3CA	4	1	x0	0.000329647	slow
-3.07391	CPK3CA	4	1	x0	0.00085564	slow
-2.44842	CPK3CA	4	1	x0	0.000558033	slow
-3.93848	CPK3CA	4	1	x0	0.000802249	slow
-4.51662	CPK3CA	4	1	x0	0.00109871	slow
-2.06988	CPK3CA	4	1	x0	0.00233123	slow
-3.54794	CPK3CA	4	1	x0	0.00204805	slow
-4.136	CPK3CA	4	1	x0	0.00181962	slow
-3.68707	CPK3CA	4	1	x0	0.00211374	slow
-3.89096	CPK3CA	4	1	x0	0.00230417	slow
-3.17003	CPK3CA	4	1	x0	0.000871476	slow
-2.50431	CPK3CA	4	1	x0	0.00132081	slow
-2.33489	CPK3CA	4	1	x0	0.0020307	slow
-2.36382	CPK3CA	4	1	x0	0.0014143	slow
-3.44915	CPK3CA	4	1	x0	0.000815709	slow
-2.91863	CPK3CA	4	1	x0	0.00113619	slow
-2.55145	CPK3CA	4	1	x0	-0.000242449	slow
-3.02781	CPK3CA	4	1	x0	0.000835641	slow
-2.72699	CPK3CA	4	1	x0	0.00070236	slow
-2.98425	CPK3CA	4	1	x0	0.00119158	slow
-3.10185	CPK3CA	4	1	x0	0.00201285	slow
-2.84298	CPK3CA	4	1	x0	0.00025231	slow
-3.37375	CPK3CA	4	1	x0	0.00237026	slow
-2.5263	CPK3CA	4	1	x0	0.000594082	slow
-3.1529	CPK3CA	4	1	x0	0.000405083	slow
-2.88341	CPK3CA	4	1	x0	0.000811343	slow
-2.97735	CPK3CA	4	1	x0	0.000512717	slow
-2.44864	CPK3CA	4	1	x0	0.0123616	slow
-2.48217	CPK3CA	4	1	x0	0.00063751	slow
-2.94457	CPK3CA	4	1	x0	0.00164738	slow
-2.67114	CPK3CA	4	1	x0	-0.000179897	slow
-2.80686	CPK3CA	4	1	x0	0.000740208	slow
-2.62699	CPK3CA	4	1	x0	0.000393435	slow
-2.70236	CPK3CA	4	1	x0	0.00136454	slow
-2.90583	CPK3CA	4	1	x0	0.000629262	slow
-2.70246	CPK3CA	4	1	x0	-0.00019276	slow
-2.97714	CPK3CA	4	1	x0	0.000923874	slow
-2.1108	CPK3CA	4	1	x0	0.00943929	slow
-2.85062	CPK3CA	4	1	x0	0.00264746	slow
-2.73194	CPK3CA	4	1	x0	-0.000197604	slow
-3.2361	CPK3CA	4	1	x0	0.00158913	slow
-2.32447	CPK3CA	4	1	x0	0.000164478	slow
-3.2394	CPK3CA	4	1	x0	0.00104914	slow
-2.1185	CPK3CA	4	1	x0	-0.00138038	slow
-2.13307	CPK3CA	4	1	x0	0.00025171	slow
-2.96243	CPK3CA	4	1	x0	0.00151991	slow
-2.8509	CPK3CA	4	1	x0	0.000811768	slow
-3.61523	CPK3CA	4	1	x0	0.00120031	slow
-2.82482	CPK3CA	4	1	x0	-0.000261919	slow
-2.17733	CPK3CA	4	1	x0	0.324237	slow
-2.95023	CPK3CA	4	1	x0	0.00145122	slow
-2.65148	CPK3CA	4	1	x0	0.00154253	slow
-2.40922	CPK3CA	4	1	x0	-0.000375445	slow
-2.90711	CPK3CA	4	1	x0	0.00253242	slow
-2.58824	CPK3CA	4	1	x0	0.000686648	slow
-2.95699	CPK3CA	4	1	x0	0.00188926	slow
-3.51068	CPK3CA	4	1	x0	0.00115577	slow
-2.12278	CPK3CA	4	1	x0	0.084151	slow
-4.03232	CPK3CA	4	1	x0	0.00133249	slow
-2.06715	CPK3CA	4	1	x0	7.13e-05	slow
-2.03366	CPK3CA	4	1	x0	-0.00249925	slow
-3.17604	CPK3CA	4	1	x0	0.00193471	slow
-2.83373	CPK3CA	4	1	x0	0.00083913	slow
-2.92175	CPK3CA	4	1	x0	0.00145518	slow
-2.55357	CPK3CA	4	1	x0	0.00155335	slow
-3.26041	CPK3CA	4	1	x0	0.00169779	slow
-2.33612	CPK3CA	4	1	x0	0.0014312	slow
-2.41308	CPK3CA	4	1	x0	0.00087154	slow
-2.09234	CPK3CA	4	1	x0	-0.00111901	slow
-3.11165	CPK3CA	4	1	x0	0.00126256	slow
-2.80234	CPK3CA	4	1	x0	0.00193972	slow
-3.16126	CPK3CA	4	1	x0	0.00154095	slow
-2.23357	CPK3CA	4	1	x0	0.000302651	slow
-2.25967	CPK3CA	4	1	x0	-0.00073041	slow
-2.28013	CPK3CA	4	1	x0	-0.000634944	slow
-2.31206	CPK3CA	4	1	x0	0.000832034	slow
-2.01158	CPK3CA	4	1	x0	0.0554447	slow
-2.69997	CPK3CA	4	1	x0	0.000461556	slow
-2.88214	CPK3CA	4	1	x0	0.000622383	slow
-2.45828	CPK3CA	4	1	x0	0.000567265	slow
-2.00801	CPK3CA	4	1	x0	0.00894555	slow
-2.2583	CPK3CA	4	1	x0	0.00149545	slow
-2.68863	CPK3CA	4	1	x0	0.00082281	slow
-2.38221	CPK3CA	4	1	x0	0.00245932	slow
-2.27455	CPK3CA	4	1	x0	-0.000345292	slow
-2.33361	CPK3CA	4	1	x0	-0.000847728	slow
-2.89533	CPK3CA	4	1	x0	0.000174518	slow
-2.46326	CPK3CA	4	1	x0	0.0563966	slow
-3.04438	CPK3CA	4	1	x0	0.00177593	slow
-2.76711	CPK3CA	4	1	x0	0.000460794	slow
-3.23589	CPK3CA	4	1	x0	0.00177942	slow
-2.76389	CPK3CA	4	1	x0	-0.000210098	slow
-2.60189	CPK3CA	4	1	x0	-3.83e-05	slow
-2.70697	CPK3CA	4	1	x0	0.00128565	slow
-2.85367	CPK3CA	4	1	x0	0.000572865	slow
-3.16505	CPK3CA	1	3	x0	0.00306194	slow
-2.30924	CPK3CA	1	3	x0	0.0182235	slow
-2.60736	CPK3CA	1	3	x0	0.00183794	slow
-2.2065	CPK3CA	1	3	x0	0.0503417	slow
-2.08625	CPK3CA	1	3	x0	0.00830863	slow
-2.27892	CPK3CA	1	3	x0	0.00547915	slow
-2.60013	CPK3CA	1	3	x0	0.00958367	slow
-2.26298	CPK3CA	1	3	x0	0.00640643	slow
-2.72595	CPK3CA	1	3	x0	0.00308529	slow
-2.15788	CPK3CA	1	3	x0	0.00161939	slow
-2.75268	CPK3CA	1	3	x0	0.0058248	slow
-2.52824	CPK3CA	1	3	x0	0.00649854	slow
-2.07115	CPK3CA	1	3	x0	0.000533964	slow
-2.14973	CPK3CA	1	3	x0	-0.000255069	slow
-3.02918	CPK3CA	1	3	x0	0.00615999	slow
-2.85327	CPK3CA	1	3	x0	0.012169	slow
-2.54197	CPK3CA	1	3	x0	0.00326142	slow
-3.74789	CPK3CA	1	3	x0	0.000140133	slow
-2.12897	CPK3CA	1	3	x0	0.00428859	slow
-2.4822	CPK3CA	1	3	x0	0.00266979	slow
-2.03784	CPK3CA	1	3	x0	0.00160847	slow
-3.27781	CPK3CA	1	3	x0	0.00395233	slow
-2.83478	CPK3CA	1	3	x0	0.00472182	slow
-3.00691	CPK3CA	1	3	x0	0.00751455	slow
-3.58056	CPK3CA	1	3	x0	0.00549197	slow
-2.43484	CPK3CA	1	3	x0	0.000938245	slow
-2.19222	CPK3CA	1	3	x0	0.00171071	slow
-3.09031	CPK3CA	1	3	x0	0.00371643	slow
-2.63727	CPK3CA	1	3	x0	0.00164003	slow
-3.09237	CPK3CA	1	3	x0	0.00411845	slow
-2.14879	CPK3CA	2	3	x0	0.0136241	slow
-2.69533	CPK3CA	2	3	x0	0.00238792	slow
-3.65288	CPK3CA	2	3	x0	0.0310585	slow
-2.22221	CPK3CA	2	3	x0	0.00281217	slow
-2.56476	CPK3CA	2	3	x0	0.00271621	slow
-2.84609	CPK3CA	2	3	x0	0.00309521	slow
-3.19495	CPK3CA	2	3	x0	0.00259312	slow
-2.07604	CPK3CA	2	3	x0	0.0163543	slow
-2.21833	CPK3CA	2	3	x0	0.0235915	slow
-2.22972	CPK3CA	2	3	x0	0.00538725	slow
-2.14861	CPK3CA	2	3	x0	0.00118963	slow
-2.38759	CPK3CA	2	3	x0	0.00193172	slow
-2.94236	CPK3CA	2	3	x0	0.0063358	slow
-2.38131	CPK3CA	2	3	x0	0.0133698	slow
-2.61169	CPK3CA	2	3	x0	0.00040465	slow
-2.26027	CPK3CA	2	3	x0	0.00529244	slow
-2.05516	CPK3CA	2	3	x0	-7.85e-05	slow
-2.06048	CPK3CA	2	3	x0	0.00410233	slow
-2.22655	CPK3CA	2	3	x0	0.00606037	slow
-3.28124	CPK3CA	2	3	x0	0.0115463	slow
-2.10555	CPK3CA	2	3	x0	0.00845717	slow
-2.31994	CPK3CA	2	3	x0	0.0104587	slow
-3.24629	CPK3CA	2	3	x0	0.00211349	slow
-2.57996	CPK3CA	2	3	x0	0.00347665	slow
-2.28157	CPK3CA	2	3	x0	0.00402671	slow
-2.72268	CPK3CA	2	3	x0	0.00872913	slow
-2.42898	CPK3CA	2	3	x0	0.00120976	slow
-2.25138	CPK3CA	2	3	x0	0.00406851	slow
-2.37367	CPK3CA	2	3	x0	0.0071053	slow
-2.00492	CPK3CA	2	3	x0	0.00499908	slow
-2.36602	CPK3CA	2	3	x0	0.00460732	slow
-2.36455	CPK3CA	2	3	x0	0.00756702	slow
-2.02063	CPK3CA	2	3	x0	0.0056461	slow
-2.08081	CPK3CA	2	3	x0	0.00457951	slow
-4.01051	CPK3CA	2	3	x0	0.00656262	slow
-2.1652	CPK3CA	3	3	x0	0.0863342	slow
-4.46933	CPK3CA	3	3	x0	0.00276873	slow
-2.05466	CPK3CA	3	3	x0	0.00125824	slow
-2.18326	CPK3CA	3	3	x0	0.000324351	slow
-2.73291	CPK3CA	3	3	x0	-2.79e-05	slow
-2.62715	CPK3CA	3	3	x0	-0.000180976	slow
-2.72525	CPK3CA	5	3	x0	0.00117038	slow
-2.84473	CPK3CA	5	3	x0	0.000442616	slow
-3.39575	CPK3CA	5	3	x0	0.00424653	slow
-2.48478	CPK3CA	5	3	x0	0.0017396	slow
-2.4364	CPK3CA	5	3	x0	0.00171042	slow
-2.65604	CPK3CA	5	3	x0	0.00147162	slow
-2.32471	CPK3CA	5	3	x0	0.00208171	slow
-2.26045	CPK3CA	5	3	x0	0.0060296	slow
-2.09584	CPK3CA	5	3	x0	-0.00194064	slow
-2.60576	CPK3CA	5	3	x0	0.00441031	slow
-2.89805	CPK3CA	5	3	x0	0.00144763	slow
-2.38985	CPK3CA	5	3	x0	-0.000391659	slow
-3.38084	CPK3CA	5	3	x0	0.00104197	slow
-3.16254	CPK3CA	5	3	x0	0.00168452	slow
-3.76808	CPK3CA	5	3	x0	0.000580327	slow
-3.38044	CPK3CA	5	3	x0	0.000223653	slow
-2.83545	CPK3CA	5	3	x0	0.00205404	slow
-2.12221	CPK3CA	5	3	x0	-0.000404014	slow
-2.12447	CPK3CA	5	3	x0	0.00183338	slow
-2.10861	CPK3CA	5	3	x0	-0.00173031	slow
-2.05239	CPK3CA	5	3	x0	-0.000554327	slow
-2.3658	CPK3CA	5	3	x0	0.00688566	slow
-2.23239	CPK3CA	5	3	x0	0.000347193	slow
-2.11816	CPK3CA	5	3	x0	0.00111953	slow
-3.16607	CPK3CA	5	3	x0	0.0010646	slow
-3.16788	CPK3CA	5	3	x0	0.00445775	slow
-2.10259	CPK3CA	5	3	x0	0.000695359	slow
-2.78525	CPK3CA	5	3	x0	0.00388628	slow
-4.61742	CPK3CA	5	3	x0	0.000890243	slow
-2.99256	CPK3CA	5	3	x0	0.000479327	slow
-3.08825	CPK3CA	5	3	x0	0.00255917	slow
-2.20274	CPK3CA	5	3	x0	0.000223607	slow
-2.24631	CPK3CA	5	3	x0	0.000951943	slow
-2.55989	CPK3CA	5	3	x0	0.00310247	slow
-3.70139	CPK3CA	5	3	x0	0.00700478	slow
-2.65593	CPK3CA	5	3	x0	-7.65e-05	slow
-2.35238	CPK3CA	5	3	x0	0.000862659	slow
-3.02932	CPK3CA	5	3	x0	0.00299814	slow
-2.07405	CPK3CA	5	3	x0	0.000577149	slow
-2.15866	CPK3CA	5	3	x0	-0.000320461	slow
-2.18575	CPK3CA	5	3	x0	0.0948157	slow
-2.38648	CPK3CA	5	3	x0	0.00357661	slow
-3.5255	CPK3CA	5	3	x0	0.000785143	slow
-2.85535	CPK3CA	5	3	x0	0.00135049	slow
-2.8883	CPK3CA	5	3	x0	0.00253282	slow
-3.37393	CPK3CA	5	3	x0	0.00140676	slow
-2.59967	CPK3CA	5	3	x0	0.00238501	slow
-2.04279	CPK3CA	5	3	x0	0.00349076	slow
-2.84212	CPK3CA	5	3	x0	0.0024596	slow
-2.3022	CPK3CA	5	3	x0	-0.000520612	slow
-2.25891	CPK3CA	5	3	x0	0.00353544	slow
-2.51213	CPK3CA	5	3	x0	0.00457723	slow
-2.16686	CPK3CA	5	3	x0	-0.000751418	slow
-3.42628	CPK3CA	5	3	x0	0.00737918	slow
-2.08044	CPK3CA	5	3	x0	0.0102768	slow
-2.64087	CPK3CA	5	3	x0	-0.000206508	slow
-3.20796	CPK3CA	5	3	x0	0.000893541	slow
-2.44303	CPK3CA	5	3	x0	0.000240788	slow
-2.38701	CPK3CA	5	3	x0	0.0031667	slow
-2.7897	CPK3CA	5	3	x0	0.0056169	slow
-3.01332	CPK3CA	5	3	x0	0.00533577	slow
-2.63602	CPK3CA	5	3	x0	0.000417973	slow
-2.92936	CPK3CA	5	3	x0	0.0038377	slow
-2.47804	CPK3CA	5	3	x0	0.00127161	slow
-2.59445	CPK3CA	5	3	x0	0.000995354	slow
-2.70105	CPK3CA	5	3	x0	0.00325796	slow
-2.43508	CPK3CA	5	3	x0	0.00657177	slow
-2.6499	CPK3CA	5	3	x0	0.0147019	slow
-4.36487	CPK3CA	5	3	x0	0.00168734	slow
-3.02189	CPK3CA	5	3	x0	0.00374739	slow
-2.35141	CPK3CA	5	3	x0	0.0293482	slow
-2.91334	CPK3CA	5	3	x0	0.00125773	slow
-2.37986	CPK3CA	5	3	x0	0.00133846	slow
-2.47056	CPK3CA	5	3	x0	0.00242337	slow
-3.09204	CPK3CA	5	3	x0	0.00223286	slow
-2.87115	CPK3CA	5	3	x0	0.000916616	slow
-2.14248	CPK3CA	5	3	x0	0.00107835	slow
-3.10623	CPK3CA	5	3	x0	0.00525545	slow
-2.66303	CPK3CA	5	3	x0	0.134738	slow
-2.38828	CPK3CA	5	3	x0	0.00133155	slow
-2.22291	CPK3CA	5	3	x0	0.00491692	slow
-2.66998	CPK3CA	5	3	x0	0.00271797	slow
-2.7815	CPK3CA	5	3	x0	0.000793987	slow
-3.01523	CPK3CA	5	3	x0	0.00348515	slow
-2.10548	CPK3CA	5	3	x0	-0.000451113	slow
-3.38939	CPK3CA	5	3	x0	0.00133821	slow
-2.98049	CPK3CA	5	3	x0	0.000667377	slow
-3.35266	CPK3CA	5	3	x0	0.000626331	slow
-2.24814	CPK3CA	5	3	x0	0.0022741	slow
-3.75853	CPK3CA	5	3	x0	0.00265904	slow
-2.41312	CPK3CA	5	3	x0	0.00174899	slow
-2.78279	CPK3CA	5	3	x0	0.000544337	slow
-2.53587	CPK3CA	5	3	x0	0.00553225	slow
-2.09637	CPK3CA	5	3	x0	0.00208914	slow
-2.88682	CPK3CA	5	3	x0	0.0021022	slow
-2.52892	CPK3CA	5	3	x0	0.000434895	slow
-2.61912	CPK3CA	5	3	x0	0.000469009	slow
-2.28736	CPK3CA	5	3	x0	0.0042167	slow
-3.09518	CPK3CA	5	3	x0	0.00146589	slow
-3.25959	CPK3CA	5	3	x0	0.00316009	slow
-2.63716	CPK3CA	5	3	x0	0.00122459	slow
-2.31223	CPK3CA	5	3	x0	3.6e-05	slow
-2.72119	CPK3CA	5	3	x0	0.0020271	slow
-3.38234	CPK3CA	5	3	x0	0.00521813	slow
-2.63023	CPK3CA	5	3	x0	0.0376043	slow
-2.30782	CPK3CA	5	3	x0	0.00507798	slow
-2.64387	CPK3CA	5	3	x0	0.00357514	slow
-2.10428	CPK3CA	5	3	x0	0.0542873	slow
-2.41665	CPK3CA	5	3	x0	0.111027	slow
-3.34968	CPK3CA	5	3	x0	0.00162294	slow
-2.96468	CPK3CA	5	3	x0	0.00224356	slow
-3.08449	CPK3CA	5	3	x0	0.00240984	slow
-3.30519	CPK3CA	5	3	x0	0.00135772	slow
-3.0371	CPK3CA	5	3	x0	0.000727472	slow
-2.58957	CPK3CA	5	3	x0	0.00103009	slow
-2.37556	CPK3CA	5	3	x0	0.00276522	slow
-2.77772	CPK3CA	5	3	x0	0.000363638	slow
-3.42541	CPK3CA	5	3	x0	0.00236372	slow
-2.06919	CPK3CA	5	3	x0	0.00127855	slow
-3.19182	CPK3CA	5	3	x0	0.0016677	slow
-2.28787	CPK3CA	5	3	x0	-0.00106208	slow
-2.11796	CPK3CA	5	3	x0	0.0317274	slow
-2.07063	CPK3CA	6	3	x0	0.0293631	slow
-2.24745	CPK3CA	6	3	x0	0.0246407	slow
-2.99465	CPK3CA	6	3	x0	0.0086051	slow
-4.79854	CPK3CA	6	3	x0	0.0197976	slow
-2.1291	CPK3CA	6	3	x0	-0.000119783	slow
-3.60859	CPK3CA	6	3	x0	0.00280058	slow
-2.47505	CPK3CA	6	3	x0	0.00812289	slow
-2.10575	CPK3CA	6	3	x0	0.00156248	slow
-2.33627	CPK3CA	6	3	x0	0.00913128	slow
-2.69611	CPK3CA	6	3	x0	0.00141258	slow
-2.35634	CPK3CA	6	3	x0	0.00675565	slow
-3.56648	CPK3CA	6	3	x0	0.00229655	slow
-2.92902	CPK3CA	6	3	x0	0.00288448	slow
-2.23907	CPK3CA	6	3	x0	-0.000310712	slow
-2.09612	CPK3CA	6	3	x0	0.0235545	slow
-2.54979	CPK3CA	6	3	x0	0.00525774	slow
-2.73313	CPK3CA	6	3	x0	0.0103535	slow
-2.09667	CPK3CA	6	3	x0	0.054376	slow
-3.16337	CPK3CA	6	3	x0	0.0093745	slow
-3.11158	CPK3CA	6	3	x0	0.00457893	slow
-2.55354	CPK3CA	6	3	x0	0.00468838	slow
-2.24551	CPK3CA	6	3	x0	0.00317345	slow
-2.52548	CPK3CA	6	3	x0	0.00494493	slow
-2.96627	CPK3CA	6	3	x0	0.00493354	slow
-2.21723	CPK3CA	6	3	x0	0.00109505	slow
-2.40882	CPK3CA	6	3	x0	0.00701101	slow
-3.05113	CPK3CA	6	3	x0	0.0661319	slow
-3.11739	CPK3CA	6	3	x0	0.020114	slow
-2.48599	CPK3CA	6	3	x0	0.00492164	slow
-3.82451	CPK3CA	6	3	x0	0.00948295	slow
-2.19715	CPK3CA	6	3	x0	0.00423342	slow
-2.17244	CPK3CA	6	3	x0	0.00204463	slow
-2.73989	CPK3CA	6	3	x0	0.00194213	slow
-2.70439	CPK3CA	6	3	x0	0.0032935	slow
-3.06772	CPK3CA	6	3	x0	0.00596135	slow
-2.238	CPK3CA	6	3	x0	0.00268901	slow
-2.90367	CPK3CA	6	3	x0	0.00951414	slow
-2.08234	CPK3CA	6	3	x0	0.00343944	slow
-3.29656	CPK3CA	6	3	x0	0.000371617	slow
-2.29293	CPK3CA	6	3	x0	0.00357464	slow
-2.18285	CPK3CA	6	3	x0	0.00284057	slow
-2.23992	CPK3CA	6	3	x0	0.0175926	slow
-3.02351	CPK3CA	6	3	x0	0.00244458	slow
-2.10623	CPK3CA	6	3	x0	0.018607	slow
-3.75327	CPK3CA	6	3	x0	0.00154657	slow
-2.42616	CPK3CA	6	3	x0	0.00266239	slow
-2.27051	CPK3CA	6	3	x0	-0.000924364	slow
-2.61139	CPK3CA	6	3	x0	0.0156818	slow
-2.3376	CPK3CA	6	3	x0	0.0110677	slow
-2.27445	CPK3CA	6	3	x0	-0.000616375	slow
-3.2274	CPK3CA	6	3	x0	0.00399039	slow
-2.20768	CPK3CA	6	3	x0	0.0146761	slow
-3.37418	CPK3CA	6	3	x0	0.00536588	slow
-2.60332	CPK3CA	6	3	x0	0.000902565	slow
-2.51611	CPK3CA	6	3	x0	0.0012851	slow
-2.52112	CPK3CA	6	3	x0	0.00768808	slow
-2.25965	CPK3CA	6	3	x0	0.0224823	slow
-2.09795	CPK3CA	6	3	x0	0.0174136	slow
-2.118	CPK3CA	6	3	x0	0.0061532	slow
-2.19509	CPK3CA	6	3	x0	0.00303572	slow
-2.25236	CPK3CA	6	3	x0	0.00157884	slow
-2.52793	CPK3CA	6	3	x0	0.0127687	slow
-2.75596	CPK3CA	6	3	x0	0.00273454	slow
-3.28715	CPK3CA	6	3	x0	0.00350072	slow
-4.34334	CPK3CA	6	3	x0	0.0053503	slow
-2.53301	CPK3CA	6	3	x0	0.00253017	slow
-2.28416	CPK3CA	6	3	x0	0.000676127	slow
-3.19206	CPK3CA	6	3	x0	0.00255438	slow
-2.32308	CPK3CA	6	3	x0	0.0174565	slow
-2.26617	CPK3CA	6	3	x0	0.00324686	slow
-2.59053	CPK3CA	6	3	x0	0.00657355	slow
-2.53714	CPK3CA	6	3	x0	0.0015649	slow
-3.02096	CPK3CA	6	3	x0	0.00741619	slow
-2.91009	CPK3CA	6	3	x0	0.00496607	slow
-2.63933	CPK3CA	6	3	x0	0.00798991	slow
-2.15769	CPK3CA	6	3	x0	0.00114692	slow
-2.00161	CPK3CA	6	3	x0	0.00968597	slow
-2.60669	CPK3CA	6	3	x0	0.000799101	slow
-2.74002	CPK3CA	6	3	x0	0.00582811	slow
-2.00412	CPK3CA	6	3	x0	0.00304343	slow
-2.58265	CPK3CA	6	3	x0	0.0165741	slow
-2.38218	CPK3CA	6	3	x0	0.00767939	slow
-2.04495	CPK3CA	6	3	x0	0.0319724	slow
-2.62212	CPK3CA	6	3	x0	0.00899212	slow
-2.14839	CPK3CA	6	3	x0	0.00612034	slow
-2.05191	CPK3CA	6	3	x0	0.00206957	slow
-2.70975	CPK3CA	6	3	x0	0.00474131	slow
-2.75144	CPK3CA	6	3	x0	0.00501955	slow
-2.34382	CPK3CA	6	3	x0	0.00197107	slow
-2.02335	CPK3CA	6	3	x0	0.00749428	slow
-2.5477	CPK3CA	6	3	x0	0.00607594	slow
-2.31627	CPK3CA	6	3	x0	0.0040599	slow
-2.66478	CPK3CA	6	3	x0	0.0109312	slow
-2.9927	CPK3CA	6	3	x0	0.0329141	slow
-2.0455	CPK3CA	6	3	x0	0.00488554	slow
-2.07061	CPK3CA	6	3	x0	0.0113017	slow
-2.06664	CPK3CA	6	3	x0	0.00687136	slow
-2.91324	CPK3CA	6	3	x0	0.00349856	slow
-2.52706	CPK3CA	6	3	x0	0.00178424	slow
-2.07204	CPK3CA	6	3	x0	-0.00201876	slow
-2.21688	CPK3CA	6	3	x0	0.0027556	slow
-2.71705	CPK3CA	6	3	x0	0.0025818	slow
-2.78905	CPK3CA	6	3	x0	0.00462993	slow
-2.26574	CPK3CA	6	3	x0	0.00421631	slow
-2.74318	CPK3CA	6	3	x0	0.00299002	slow
-3.28855	CPK3CA	6	3	x0	0.00807426	slow
-2.30206	CPK3CA	6	3	x0	0.0207136	slow
-2.33694	CPK3CA	6	3	x0	0.00185681	slow
-2.71115	CPK3CA	6	3	x0	0.00114125	slow
-2.29553	CPK3CA	6	3	x0	0.0212807	slow
-2.1568	CPK3CA	6	3	x0	0.0166606	slow
-2.13128	CPK3CA	6	3	x0	0.00430322	slow
-3.04325	CPK3CA	6	3	x0	0.00947319	slow
-3.17319	CPK3CA	6	3	x0	0.000542699	slow
-2.41355	CPK3CA	6	3	x0	0.00179553	slow
-2.13485	CPK3CA	6	3	x0	0.0127066	slow
-2.58041	CPK3CA	6	3	x0	0.00174235	slow
-3.13289	CPK3CA	3	2	x0	0.000685933	slow
-2.44398	CPK3CA	3	2	x0	0.00052692	slow
-2.33005	CPK3CA	3	2	x0	-0.000308691	slow
-4.28606	CPK3CA	3	2	x0	0.00101922	slow
-2.84644	CPK3CA	3	2	x0	0.000953996	slow
-3.17737	CPK3CA	3	2	x0	0.000629396	slow
-2.91058	CPK3CA	3	2	x0	0.0015792	slow
-2.10244	CPK3CA	3	2	x0	-0.000130204	slow
-2.76511	CPK3CA	3	2	x0	0.00132095	slow
-2.68088	CPK3CA	3	2	x0	0.000320212	slow
-2.13993	CPK3CA	3	2	x0	-0.000411802	slow
-2.63524	CPK3CA	3	2	x0	0.001873	slow
-2.53064	CPK3CA	3	2	x0	0.00216995	slow
-2.12899	CPK3CA	3	2	x0	-0.000497391	slow
-2.69749	CPK3CA	3	2	x0	0.00140219	slow
-3.65705	CPK3CA	3	2	x0	0.00169004	slow
-2.20251	CPK3CA	3	2	x0	0.00564422	slow
-3.9637	CPK3CA	3	2	x0	0.00159882	slow
-3.22145	CPK3CA	3	2	x0	0.00102722	slow
-2.96561	CPK3CA	3	2	x0	0.00188538	slow
-4.35455	CPK3CA	3	2	x0	0.00291124	slow
-2.90937	CPK3CA	3	2	x0	7.53803e-05	slow
-2.97259	CPK3CA	3	2	x0	0.00195111	slow
-3.85106	CPK3CA	3	2	x0	0.000590697	slow
-2.94202	CPK3CA	3	2	x0	0.00118371	slow
-3.50357	CPK3CA	3	2	x0	0.000929748	slow
-3.65856	CPK3CA	3	2	x0	0.000846251	slow
-3.80562	CPK3CA	3	2	x0	0.00134698	slow
-3.48603	CPK3CA	3	2	x0	0.0015384	slow
-2.83123	CPK3CA	3	2	x0	0.00212851	slow
-2.34707	CPK3CA	3	2	x0	0.000912549	slow
-2.23603	CPK3CA	3	2	x0	-0.000467703	slow
-3.84811	CPK3CA	3	2	x0	0.00131446	slow
-2.00966	CPK3CA	3	2	x0	0.00386483	slow
-2.41419	CPK3CA	3	2	x0	0.00101924	slow
-2.31722	CPK3CA	3	2	x0	-0.000625626	slow
-2.86	CPK3CA	3	2	x0	0.000470642	slow
-2.76426	CPK3CA	3	2	x0	0.00139773	slow
-2.83503	CPK3CA	3	2	x0	0.00163615	slow
-2.67466	CPK3CA	3	2	x0	0.00115463	slow
-3.25213	CPK3CA	3	2	x0	0.00180201	slow
-2.84504	CPK3CA	3	2	x0	0.00218051	slow
-2.98283	CPK3CA	3	2	x0	0.00171302	slow
-2.62791	CPK3CA	3	2	x0	0.000638843	slow
-2.46283	CPK3CA	3	2	x0	0.000818903	slow
-3.52993	CPK3CA	3	2	x0	0.000911383	slow
-2.89866	CPK3CA	3	2	x0	-8.65732e-05	slow
-2.39051	CPK3CA	3	2	x0	0.00259181	slow
-2.38131	CPK3CA	3	2	x0	0.000641102	slow
-2.78292	CPK3CA	3	2	x0	0.000360966	slow
-4.4239	CPK3CA	3	2	x0	0.00127596	slow
-2.82155	CPK3CA	3	2	x0	0.00144141	slow
-2.66985	CPK3CA	3	2	x0	0.00067381	slow
-2.76335	CPK3CA	3	2	x0	0.000705003	slow
-2.89048	CPK3CA	3	2	x0	0.000406317	slow
-2.44543	CPK3CA	3	2	x0	-0.000300837	slow
-2.64489	CPK3CA	3	2	x0	0.000282808	slow
-2.64863	CPK3CA	3	2	x0	0.00670398	slow
-2.24213	CPK3CA	3	2	x0	0.0024756	slow
-3.09699	CPK3CA	3	2	x0	0.00402644	slow
-2.0804	CPK3CA	4	2	x0	-0.00147302	slow
-2.34996	CPK3CA	4	2	x0	0.00232036	slow
-2.83205	CPK3CA	4	2	x0	0.000294813	slow
-3.01759	CPK3CA	4	2	x0	0.00464862	slow
-2.4845	CPK3CA	4	2	x0	0.00120765	slow
-2.29241	CPK3CA	4	2	x0	0.00125597	slow
-2.21174	CPK3CA	4	2	x0	0.00752596	slow
-3.03098	CPK3CA	4	2	x0	0.000647528	slow
-2.76431	CPK3CA	4	2	x0	0.00263626	slow
-2.29518	CPK3CA	4	2	x0	-0.000559414	slow
-2.9477	CPK3CA	4	2	x0	0.00244885	slow
-3.49476	CPK3CA	4	2	x0	0.000966361	slow
-2.71728	CPK3CA	4	2	x0	0.00118725	slow
-2.64189	CPK3CA	4	2	x0	0.00168582	slow
-2.83636	CPK3CA	4	2	x0	0.00140207	slow
-2.55574	CPK3CA	4	2	x0	0.000885984	slow
-3.08226	CPK3CA	4	2	x0	0.000789489	slow
-2.97421	CPK3CA	4	2	x0	0.00228991	slow
-2.3688	CPK3CA	4	2	x0	0.000377076	slow
-2.46852	CPK3CA	4	2	x0	0.00209135	slow
-2.33636	CPK3CA	4	2	x0	0.0106898	slow
-2.09122	CPK3CA	4	2	x0	-0.00220447	slow
-3.46715	CPK3CA	4	2	x0	0.00205076	slow
-3.10443	CPK3CA	4	2	x0	0.00134219	slow
-3.29362	CPK3CA	4	2	x0	0.00507212	slow
-2.67095	CPK3CA	4	2	x0	0.00404805	slow
-2.83312	CPK3CA	4	2	x0	0.00177949	slow
-2.63444	CPK3CA	4	2	x0	0.00621567	slow
-2.2978	CPK3CA	4	2	x0	-0.000263842	slow
-2.09855	CPK3CA	4	2	x0	7.79e-05	slow
-2.17027	CPK3CA	4	2	x0	-0.000670658	slow
-4.47995	CPK3CA	4	2	x0	0.00451565	slow
-3.40353	CPK3CA	4	2	x0	0.00221077	slow
-2.37537	CPK3CA	4	2	x0	0.000436925	slow
-2.41603	CPK3CA	4	2	x0	0.00048747	slow
-3.68263	CPK3CA	4	2	x0	0.000600026	slow
-2.89271	CPK3CA	4	2	x0	0.000523228	slow
-3.14753	CPK3CA	4	2	x0	0.00432397	slow
-2.78457	CPK3CA	4	2	x0	0.00124734	slow
-3.5605	CPK3CA	4	2	x0	0.00228005	slow
-3.74259	CPK3CA	4	2	x0	0.00128234	slow
-2.20298	CPK3CA	4	2	x0	0.000126785	slow
-2.29272	CPK3CA	4	2	x0	0.000918622	slow
-2.14311	CPK3CA	4	2	x0	-0.00120519	slow
-2.021	CPK3CA	4	2	x0	0.0889011	slow
-2.30593	CPK3CA	4	2	x0	0.000475624	slow
-2.32908	CPK3CA	4	2	x0	-0.000285355	slow
-2.05842	CPK3CA	4	2	x0	-0.00013271	slow
-2.45812	CPK3CA	4	2	x0	0.00180894	slow
-2.81677	CPK3CA	4	2	x0	-1.4e-05	slow
-2.35722	CPK3CA	4	2	x0	0.00107699	slow
-2.53415	CPK3CA	4	2	x0	0.00113346	slow
-2.31032	CPK3CA	4	2	x0	-0.000359181	slow
-2.04479	CPK3CA	4	2	x0	0.356977	slow
-3.84991	CPK3CA	4	2	x0	0.0019991	slow
-3.11677	CPK3CA	4	2	x0	0.00132987	slow
-2.66862	CPK3CA	4	2	x0	0.000138747	slow
-3.32732	CPK3CA	4	2	x0	0.00313409	slow
-2.36632	CPK3CA	4	2	x0	0.00145902	slow
-2.87178	CPK3CA	4	2	x0	0.00274952	slow
-2.25506	CPK3CA	4	2	x0	-0.000688487	slow
-2.35268	CPK3CA	4	2	x0	0.00242679	slow
-4.20051	CPK3CA	4	2	x0	0.00140661	slow
-2.27001	CPK3CA	4	2	x0	0.00359881	slow
-2.97005	CPK3CA	4	2	x0	0.00336835	slow
-2.20297	CPK3CA	4	2	x0	0.00131939	slow
-2.45223	CPK3CA	4	2	x0	0.00242455	slow
-2.58148	CPK3CA	4	2	x0	0.00350566	slow
-3.16691	CPK3CA	4	2	x0	0.00203832	slow
-3.03856	CPK3CA	4	2	x0	0.00116573	slow
-2.71596	CPK3CA	4	2	x0	0.00221968	slow
-3.5106	CPK3CA	4	2	x0	0.00238695	slow
-3.62258	CPK3CA	4	2	x0	0.00396278	slow
-4.1266	CPK3CA	4	2	x0	0.00285796	slow
-2.38255	CPK3CA	4	2	x0	0.00127327	slow
-3.04768	CPK3CA	4	2	x0	0.00536643	slow
-2.84253	CPK3CA	4	2	x0	0.00230362	slow
-2.79392	CPK3CA	4	2	x0	0.0208737	slow
-2.68076	CPK3CA	4	2	x0	0.000100447	slow
-3.01993	CPK3CA	4	2	x0	0.00305822	slow
-2.47746	CPK3CA	4	2	x0	0.00350162	slow
-2.52032	CPK3CA	4	2	x0	0.00500588	slow
-2.17275	CPK3CA	4	2	x0	0.00164133	slow
-3.70991	CPK3CA	4	2	x0	0.00180016	slow
-2.94232	CPK3CA	4	2	x0	0.000818335	slow
-2.14533	CPK3CA	4	2	x0	0.00183783	slow
-3.82888	CPK3CA	4	2	x0	0.00309234	slow
-2.59379	CPK3CA	4	2	x0	0.00961942	slow
-2.30796	CPK3CA	4	2	x0	0.000474467	slow
-2.26342	CPK3CA	4	2	x0	0.000324803	slow
-2.07085	CPK3CA	4	2	x0	-0.000327277	slow
-2.11488	CPK3CA	4	2	x0	-0.000208993	slow
-3.91624	CPK3CA	4	2	x0	0.00180631	slow
-2.3624	CPK3CA	4	2	x0	0.000359144	slow
-2.55753	CPK3CA	4	2	x0	0.00114362	slow
-3.56276	CPK3CA	4	2	x0	0.00241544	slow
-2.05764	CPK3CA	4	2	x0	0.00682674	slow
-2.94246	CPK3CA	4	2	x0	0.0018725	slow
-2.32984	CPK3CA	4	2	x0	0.000395917	slow
-2.66314	CPK3CA	4	2	x0	0.00263131	slow
-2.65801	CPK3CA	4	2	x0	0.000888776	slow
-2.13272	CPK3CA	4	2	x0	-0.000491173	slow
-2.58885	CPK3CA	4	2	x0	0.00046134	slow
-2.1401	CPK3CA	4	2	x0	0.00760568	slow
-3.44273	CPK3CA	4	2	x0	6.98e-05	slow
-3.78817	CPK3CA	4	2	x0	0.00469192	slow
-2.98237	CPK3CA	4	2	x0	0.00084918	slow
-2.63549	CPK3CA	4	2	x0	0.00734567	slow
-2.28884	CPK3CA	4	2	x0	0.00353075	slow
-2.95128	CPK3CA	4	2	x0	0.00169165	slow
-2.0191	CPK3CA	4	2	x0	0.00166536	slow
-2.31299	CPK3CA	4	2	x0	0.00192863	slow
-2.48457	CPK3CA	4	2	x0	0.00102466	slow
-2.5573	CPK3CA	4	2	x0	0.000784367	slow
-3.07479	CPK3CA	4	2	x0	0.0020144	slow
-2.86413	CPK3CA	4	2	x0	0.00101769	slow
-2.36155	CPK3CA	4	2	x0	0.00256164	slow
-2.03983	CPK3CA	4	2	x0	0.00507508	slow
-3.0691	CPK3CA	4	2	x0	0.00185903	slow
-2.31822	CPK3CA	4	2	x0	0.0148632	slow
-2.16385	CPK3CA	4	2	x0	0.00643156	slow
-2.73149	CPK3CA	4	2	x0	0.0205807	slow
-2.71373	CPK3CA	4	2	x0	0.00214155	slow
-3.06532	CPK3CA	4	2	x0	0.00382542	slow
-2.74608	CPK3CA	4	2	x0	0.00662895	slow
-2.58708	CPK3CA	4	2	x0	0.00159929	slow
-2.82355	CPK3CA	4	2	x0	0.00396527	slow
-2.23303	CPK3CA	4	2	x0	0.00382688	slow
-2.69317	CPK3CA	4	2	x0	0.000496666	slow
-3.49607	CPK3CA	4	2	x0	0.00130858	slow
-2.69905	CPK3CA	4	2	x0	0.00221575	slow
-2.62906	CPK3CA	4	2	x0	0.00709768	slow
-3.90645	CPK3CA	4	2	x0	0.00237107	slow
-2.98249	CPK3CA	4	2	x0	0.000787391	slow
-3.36138	CPK3CA	4	2	x0	0.00245296	slow
-2.27306	CPK3CA	4	2	x0	0.00596124	slow
-3.15161	CPK3CA	4	2	x0	0.00161871	slow
-2.98083	CPK3CA	4	2	x0	0.00140697	slow
-2.0757	CPK3CA	4	2	x0	0.00174094	slow
-2.1912	CPK3CA	4	2	x0	0.00278924	slow
-2.07939	CPK3CA	4	2	x0	-0.00128984	slow
-2.52971	CPK3CA	4	2	x0	0.00208901	slow
-2.04025	CPK3CA	4	2	x0	0.00110804	slow
-2.34802	CPK3CA	4	2	x0	0.00289815	slow
-2.16517	CPK3CA	4	2	x0	-0.00109885	slow
-2.53611	CPK3CA	4	2	x0	0.00237219	slow
-2.31069	CPK3CA	4	2	x0	0.00277047	slow
-3.17102	CPK3CA	4	2	x0	0.0100387	slow
-2.18546	CPK3CA	4	2	x0	0.0545804	slow
-2.06246	CPK3CA	4	2	x0	0.000866875	slow
-3.43505	CPK3CA	4	2	x0	0.00154182	slow
-2.70307	CPK3CA	4	2	x0	0.000612657	slow
-3.51844	CPK3CA	4	2	x0	0.0022921	slow
-4.40931	CPK3CA	4	2	x0	0.00137671	slow
-2.58345	CPK3CA	4	2	x0	0.000306758	slow
-2.96266	CPK3CA	4	2	x0	0.00102637	slow
-3.516	CPK3CA	4	2	x0	0.00338249	slow
-2.89386	CPK3CA	4	2	x0	0.000706406	slow
-2.67336	CPK3CA	4	2	x0	0.00182728	slow
-2.72387	CPK3CA	4	2	x0	0.00589744	slow
-2.34029	CPK3CA	4	2	x0	0.000664806	slow
-2.45192	CPK3CA	4	2	x0	-0.000126133	slow
-2.77801	CPK3CA	4	2	x0	0.234801	slow
-2.64685	CPK3CA	4	2	x0	0.000372625	slow
-2.60892	CPK3CA	4	2	x0	0.000982181	slow
-2.49705	CPK3CA	4	2	x0	0.000588405	slow
-2.01636	CPK3CA	4	2	x0	0.0490697	slow
-2.7833	CPK3CA	4	2	x0	0.0011599	slow
-4.57082	CPK3CA	4	2	x0	0.0021396	slow
-2.22377	CPK3CA	4	2	x0	0.00245671	slow
-2.87359	CPK3CA	4	2	x0	0.00285222	slow
-2.37867	CPK3CA	4	2	x0	0.0017176	slow
-2.57948	CPK3CA	4	2	x0	0.00567834	slow
-2.09211	CPK3CA	4	2	x0	-0.000125522	slow
-2.91157	CPK3CA	4	2	x0	0.00296887	slow
-2.59817	CPK3CA	4	2	x0	0.00247124	slow
-2.63134	CPK3CA	4	2	x0	0.00287686	slow
-2.44081	CPK3CA	4	2	x0	0.00193377	slow
-2.34545	CPK3CA	4	2	x0	0.00281385	slow
-2.22067	CPK3CA	4	2	x0	0.000852767	slow
-2.3426	CPK3CA	4	2	x0	0.00289052	slow
-2.42018	CPK3CA	4	2	x0	0.00106192	slow
-3.41164	CPK3CA	4	2	x0	0.00184541	slow
-3.00317	CPK3CA	4	2	x0	0.00372025	slow
-2.12863	CPK3CA	4	2	x0	-0.000524601	slow
-2.55064	CPK3CA	4	2	x0	0.00307169	slow
-2.30312	CPK3CA	4	2	x0	0.00165418	slow
-2.48138	CPK3CA	4	2	x0	0.00246054	slow
-2.26906	CPK3CA	4	2	x0	0.00108604	slow
-2.48241	CPK3CA	4	2	x0	0.00120704	slow
-2.35327	CPK3CA	4	2	x0	0.00208901	slow
-2.47401	CPK3CA	4	2	x0	0.00254068	slow
-3.32339	CPK3CA	4	2	x0	0.00272857	slow
-2.8462	CPK3CA	4	2	x0	0.00649073	slow
-2.92621	CPK3CA	4	2	x0	0.00211716	slow
-2.59807	CPK3CA	4	2	x0	0.000908274	slow
-2.26299	CPK3CA	4	2	x0	0.00476402	slow
-2.1731	CPK3CA	4	2	x0	0.000992623	slow
-2.45787	CPK3CA	4	2	x0	4.33e-05	slow
-3.20789	CPK3CA	4	2	x0	0.000916812	slow
-2.25292	CPK3CA	4	2	x0	0.162405	slow
-2.21426	CPK3CA	4	2	x0	0.00125292	slow
-2.18401	CPK3CA	4	2	x0	0.00856279	slow
-2.81156	CPK3CA	4	2	x0	0.00086475	slow
-4.65006	CPK3CA	4	2	x0	0.00223119	slow
-2.50601	CPK3CA	4	2	x0	0.00243342	slow
-3.63129	CPK3CA	4	2	x0	0.00429025	slow
-2.35049	CPK3CA	4	2	x0	0.000520791	slow
-2.25983	CPK3CA	4	2	x0	0.00170533	slow
-2.37619	CPK3CA	4	2	x0	0.000749148	slow
-2.8186	CPK3CA	4	2	x0	0.00181255	slow
-2.83734	CPK3CA	4	2	x0	0.00220734	slow
-2.17643	CPK3CA	4	2	x0	0.000330604	slow
-3.04147	CPK3CA	4	2	x0	0.000553893	slow
-3.13151	CPK3CA	4	2	x0	0.000564155	slow
-3.03481	CPK3CA	4	2	x0	0.00235433	slow
-3.79631	CPK3CA	4	2	x0	0.00403773	slow
-2.2741	CPK3CA	4	2	x0	-0.00111371	slow
-2.19647	CPK3CA	4	2	x0	0.000101075	slow
-2.22942	CPK3CA	4	2	x0	-0.000733376	slow
-2.86846	CPK3CA	4	2	x0	0.0072738	slow
-2.40739	CPK3CA	4	2	x0	0.000965259	slow
-2.52143	CPK3CA	4	2	x0	0.000964933	slow
-2.82073	CPK3CA	4	2	x0	0.00189503	slow
-3.00434	CPK3CA	4	2	x0	0.00089993	slow
-3.20261	CPK3CA	4	2	x0	0.00174136	slow
-2.42258	CPK3CA	4	2	x0	0.00184744	slow
-2.72305	CPK3CA	4	2	x0	0.00468917	slow
-2.65193	CPK3CA	4	2	x0	0.00115794	slow
-2.34932	CPK3CA	4	2	x0	-0.000703175	slow
-2.02644	CPK3CA	4	2	x0	-0.000558213	slow
-2.14247	CPK3CA	4	2	x0	0.00716788	slow
-3.11269	CPK3CA	4	2	x0	0.00667972	slow
-3.36777	CPK3CA	4	2	x0	0.00140338	slow
-2.02231	CPK3CA	4	2	x0	0.00157591	slow
-2.2597	CPK3CA	4	2	x0	0.000379005	slow
-3.55936	CPK3CA	4	2	x0	0.00229187	slow
-3.06614	CPK3CA	4	2	x0	0.00164592	slow
-2.64875	CPK3CA	4	2	x0	0.0018435	slow
-3.02241	CPK3CA	4	2	x0	0.0632106	slow
-2.40174	CPK3CA	4	2	x0	0.00878257	slow
-2.87748	CPK3CA	4	2	x0	0.000673214	slow
-3.59486	CPK3CA	4	2	x0	0.00279557	slow
-2.72005	CPK3CA	4	2	x0	0.00230823	slow
-3.10872	CPK3CA	4	2	x0	0.00363067	slow
-2.08935	CPK3CA	4	2	x0	0.00246078	slow
-2.92759	CPK3CA	4	2	x0	0.000708857	slow
-3.85874	CPK3CA	4	2	x0	0.00199162	slow
-2.46074	CPK3CA	4	2	x0	0.00116907	slow
-2.48197	CPK3CA	4	2	x0	0.00539097	slow
-3.14773	CPK3CA	4	2	x0	0.00114577	slow
-2.93429	CPK3CA	4	2	x0	0.0017069	slow
-2.58175	CPK3CA	4	2	x0	0.00160429	slow
-2.70209	CPK3CA	4	2	x0	0.000652112	slow
-3.86371	CPK3CA	4	2	x0	0.000438697	slow
-2.79164	CPK3CA	4	2	x0	0.00227369	slow
-3.40398	CPK3CA	4	2	x0	0.00116055	slow
-2.72858	CPK3CA	4	2	x0	0.00235294	slow
-2.55156	CPK3CA	4	2	x0	0.000166865	slow
-2.35676	CPK3CA	4	2	x0	0.00208287	slow
-2.43116	CPK3CA	4	2	x0	0.000425644	slow
-2.52668	CPK3CA	4	2	x0	0.00101512	slow
-2.96596	CPK3CA	4	2	x0	0.000558839	slow
-2.75031	CPK3CA	4	2	x0	0.00478051	slow
-2.01304	CPK3CA	4	2	x0	-0.00251229	slow
-2.91148	CPK3CA	4	2	x0	0.00093666	slow
-2.4161	CPK3CA	4	2	x0	0.000813764	slow
-3.00347	CPK3CA	4	2	x0	0.00201308	slow
-2.28185	CPK3CA	4	2	x0	0.00172704	slow
-2.32123	CPK3CA	4	2	x0	0.00357755	slow
-3.87466	CPK3CA	4	2	x0	0.00929719	slow
-2.51685	CPK3CA	4	2	x0	0.00868638	slow
-2.46237	CPK3CA	4	2	x0	0.00132689	slow
-2.8398	CPK3CA	4	2	x0	0.00107303	slow
-3.11125	CPK3CA	4	2	x0	0.000955203	slow
-2.15818	CPK3CA	4	2	x0	0.00983687	slow
-2.06137	CPK3CA	4	2	x0	0.0584129	slow
-2.27578	CPK3CA	4	2	x0	0.000504276	slow
-2.91185	CPK3CA	4	2	x0	0.00172259	slow
-2.30028	CPK3CA	4	2	x0	0.00116694	slow
-2.58001	CPK3CA	4	2	x0	0.00273189	slow
-2.81587	CPK3CA	4	2	x0	0.0016329	slow
-4.28026	CPK3CA	4	2	x0	0.00136504	slow
-2.79612	CPK3CA	4	2	x0	0.00226215	slow
-2.33683	CPK3CA	4	2	x0	-0.000316906	slow
-2.57936	CPK3CA	4	2	x0	0.00076632	slow
-2.00744	CPK3CA	4	2	x0	0.0081685	slow
-2.00828	CPK3CA	4	2	x0	0.00995278	slow
-2.14342	CPK3CA	4	2	x0	0.00618961	slow
-2.72013	CPK3CA	4	2	x0	0.00292063	slow
-2.37915	CPK3CA	4	2	x0	0.00781249	slow
-2.71679	CPK3CA	4	2	x0	0.000816404	slow
-2.877	CPK3CA	4	2	x0	0.00651591	slow
-2.07412	CPK3CA	4	2	x0	0.00160166	slow
-2.70786	CPK3CA	4	2	x0	0.000379312	slow
-3.94679	CPK3CA	4	2	x0	0.000823168	slow
-2.00447	CPK3CA	4	2	x0	0.0870076	slow
-2.39042	CPK3CA	4	2	x0	0.000763153	slow
-2.04922	CPK3CA	4	2	x0	-0.000532593	slow
-2.20312	CPK3CA	4	2	x0	9.11e-05	slow
-2.47346	CPK3CA	4	2	x0	0.00173148	slow
-2.00845	CPK3CA	4	2	x0	0.00266301	slow
-2.51629	CPK3CA	4	2	x0	0.00315451	slow
-2.52036	CPK3CA	4	2	x0	0.000248241	slow
-2.21517	CPK3CA	4	2	x0	0.00497727	slow
-3.88142	CPK3CA	4	2	x0	0.00543986	slow
-2.03871	CPK3CA	4	2	x0	0.00275327	slow
-2.41259	CPK3CA	4	2	x0	0.00483109	slow
-2.62551	CPK3CA	4	2	x0	0.00550545	slow
-2.20434	CPK3CA	4	2	x0	0.00241803	slow
-2.31901	CPK3CA	4	2	x0	0.00666517	slow
-2.1056	CPK3CA	4	2	x0	0.0667717	slow
-2.27809	CPK3CA	4	2	x0	-0.00046294	slow
-2.4366	CPK3CA	4	2	x0	0.000514028	slow
-2.93885	CPK3CA	4	2	x0	0.0016074	slow
-2.15342	CPK3CA	4	2	x0	0.00114672	slow
-3.0749	CPK3CA	4	2	x0	0.000903942	slow
-3.08064	CPK3CA	4	2	x0	0.00477711	slow
-2.26053	CPK3CA	4	2	x0	-0.00140505	slow
-2.62631	CPK3CA	4	2	x0	0.00189249	slow
-2.38599	CPK3CA	4	2	x0	0.000498838	slow
-2.91659	CPK3CA	4	2	x0	0.00289395	slow
-3.11049	CPK3CA	4	2	x0	0.0289856	slow
-2.61099	CPK3CA	4	2	x0	0.00299858	slow
-2.1105	CPK3CA	4	2	x0	0.00227247	slow
-2.13537	CPK3CA	4	2	x0	-8.88e-06	slow
-2.79106	CPK3CA	4	2	x0	0.00111942	slow
-2.96341	CPK3CA	4	2	x0	0.00113638	slow
-3.51457	CPK3CA	4	2	x0	0.00191944	slow
-2.57657	CPK3CA	4	2	x0	0.00117597	slow
-2.51766	CPK3CA	4	2	x0	0.00279351	slow
-2.20303	CPK3CA	4	2	x0	0.00139182	slow
-2.87962	CPK3CA	4	2	x0	0.0246994	slow
-2.17095	CPK3CA	4	2	x0	0.00662774	slow
-3.09083	CPK3CA	4	2	x0	0.00122505	slow
-2.85829	CPK3CA	4	2	x0	0.00198447	slow
-3.15603	CPK3CA	4	2	x0	0.00576951	slow
-2.16149	CPK3CA	4	2	x0	0.000533549	slow
-2.91864	CPK3CA	4	2	x0	0.00123678	slow
-2.75376	CPK3CA	4	2	x0	0.00119122	slow
-2.91081	CPK3CA	4	2	x0	0.00800065	slow
-3.05865	CPK3CA	4	2	x0	0.0019304	slow
-2.66455	CPK3CA	4	2	x0	0.00248263	slow
-2.62268	CPK3CA	4	2	x0	0.00270286	slow
-2.58913	CPK3CA	4	2	x0	0.000814312	slow
-3.21324	CPK3CA	4	2	x0	0.00262752	slow
-2.0271	CPK3CA	4	2	x0	0.00430261	slow
-3.60968	CPK3CA	4	2	x0	0.00216644	slow
-2.63914	CPK3CA	4	2	x0	0.000666778	slow
-2.35813	CPK3CA	4	2	x0	0.0156876	slow
-2.34536	CPK3CA	4	2	x0	0.00143167	slow
-2.99579	CPK3CA	4	2	x0	0.00161921	slow
-2.15175	CPK3CA	4	2	x0	0.00213951	slow
-2.08313	CPK3CA	4	2	x0	0.000177367	slow
-2.17189	CPK3CA	4	2	x0	0.00261791	slow
-2.98527	CPK3CA	4	2	x0	0.00156938	slow
-3.58311	CPK3CA	4	2	x0	0.00213966	slow
-2.55217	CPK3CA	4	2	x0	0.00138108	slow
-2.95791	CPK3CA	4	2	x0	0.0102484	slow
-2.74323	CPK3CA	4	2	x0	0.000828147	slow
-2.92439	CPK3CA	4	2	x0	0.000712498	slow
-2.70105	CPK3CA	4	2	x0	0.000961347	slow
-2.66412	CPK3CA	4	2	x0	0.000122067	slow
-2.35083	CPK3CA	4	2	x0	0.000686303	slow
-2.0784	CPK3CA	4	2	x0	0.00082474	slow
-3.53404	CPK3CA	4	2	x0	0.00400105	slow
-3.34117	CPK3CA	4	2	x0	0.00214652	slow
-2.71514	CPK3CA	4	2	x0	0.000213501	slow
-2.46847	CPK3CA	4	2	x0	0.000859873	slow
-2.72735	CPK3CA	4	2	x0	0.00408506	slow
-2.87035	CPK3CA	4	2	x0	0.0004085	slow
-2.29221	CPK3CA	4	2	x0	0.011574	slow
-2.51738	CPK3CA	4	2	x0	0.00118018	slow
-2.83562	CPK3CA	4	2	x0	0.00225551	slow
-2.95219	CPK3CA	4	2	x0	0.00291693	slow
-2.33228	CPK3CA	4	2	x0	0.00796762	slow
-2.33153	CPK3CA	4	2	x0	0.00146187	slow
-2.16086	CPK3CA	4	2	x0	0.0174289	slow
-3.19334	CPK3CA	4	2	x0	0.00165484	slow
-3.7355	CPK3CA	4	2	x0	0.000738566	slow
-3.17177	CPK3CA	4	2	x0	0.00193934	slow
-2.52749	CPK3CA	4	2	x0	0.00490625	slow
-2.92516	CPK3CA	4	2	x0	0.000580819	slow
-2.90082	CPK3CA	4	2	x0	0.00181197	slow
-3.54613	CPK3CA	4	2	x0	0.00153109	slow
-2.90118	CPK3CA	4	2	x0	0.00143694	slow
-2.03076	CPK3CA	4	2	x0	-0.000606735	slow
-2.79624	CPK3CA	4	2	x0	0.000422947	slow
-2.85036	CPK3CA	4	2	x0	0.00157428	slow
-3.31604	CPK3CA	4	2	x0	0.0014399	slow
-2.90066	CPK3CA	4	2	x0	0.00341633	slow
-2.26073	CPK3CA	4	2	x0	-0.000972917	slow
-2.26549	CPK3CA	4	2	x0	0.00487288	slow
-2.64048	CPK3CA	4	2	x0	0.00323671	slow
-3.82858	CPK3CA	4	2	x0	0.00103484	slow
-2.82885	CPK3CA	4	2	x0	0.000251416	slow
-4.58399	CPK3CA	4	2	x0	0.00177479	slow
-2.78803	CPK3CA	4	2	x0	0.00173093	slow
-2.79082	CPK3CA	4	2	x0	0.000649852	slow
-2.34039	CPK3CA	4	2	x0	0.00439805	slow
-2.12729	CPK3CA	4	2	x0	0.0171536	slow
-2.1715	CPK3CA	4	2	x0	0.232879	slow
-2.78873	CPK3CA	4	2	x0	0.00209307	slow
-2.44378	CPK3CA	4	2	x0	0.00121174	slow
-3.08597	CPK3CA	4	2	x0	0.00151461	slow
-2.16631	CPK3CA	4	2	x0	0.0375591	slow
-2.48814	CPK3CA	4	2	x0	0.000909874	slow
-2.06154	CPK3CA	4	2	x0	0.0212455	slow
-2.48664	CPK3CA	4	2	x0	0.139078	slow
-2.94991	CPK3CA	4	2	x0	0.00144225	slow
-3.80212	CPK3CA	4	2	x0	0.0016391	slow
-4.27953	CPK3CA	4	2	x0	0.00235695	slow
-2.88264	CPK3CA	4	2	x0	0.000796893	slow
-4.85841	CPK3CA	4	2	x0	0.0014547	slow
-2.32547	CPK3CA	4	2	x0	0.152477	slow
-2.16379	CPK3CA	4	2	x0	0.00115728	slow
-2.45444	CPK3CA	4	2	x0	0.000822248	slow
-2.54114	CPK3CA	4	2	x0	0.00281428	slow
-2.93885	CPK3CA	4	2	x0	0.00141039	slow
-2.07126	CPK3CA	4	2	x0	-0.00162164	slow
-2.11493	CPK3CA	4	2	x0	0.000885583	slow
-2.50474	CPK3CA	4	2	x0	0.000709512	slow
-2.49103	CPK3CA	4	2	x0	0.00328551	slow
-2.19861	CPK3CA	4	2	x0	0.00217976	slow
-2.57118	CPK3CA	4	2	x0	0.00231156	slow
-2.33299	CPK3CA	4	2	x0	0.00169288	slow
-2.12944	CPK3CA	4	2	x0	-0.00154487	slow
-3.1474	CPK3CA	4	2	x0	0.00112363	slow
-2.67871	CPK3CA	4	2	x0	0.000301978	slow
-2.20434	CPK3CA	4	2	x0	0.00126544	slow
-3.4422	CPK3CA	4	2	x0	0.0023764	slow
-4.14839	CPK3CA	4	2	x0	0.00466724	slow
-3.08887	CPK3CA	4	2	x0	0.000607684	slow
-3.05927	CPK3CA	4	2	x0	0.00287298	slow
-2.95013	CPK3CA	4	2	x0	0.00153933	slow
-3.81635	CPK3CA	4	2	x0	0.00279568	slow
-2.40077	CPK3CA	4	2	x0	0.0011396	slow
-2.52934	CPK3CA	4	2	x0	0.000971136	slow
-4.21796	CPK3CA	4	2	x0	0.00164198	slow
-3.19001	CPK3CA	4	2	x0	0.00105221	slow
-3.02121	CPK3CA	4	2	x0	0.00149888	slow
-2.01723	CPK3CA	4	2	x0	0.0161494	slow
-3.08293	CPK3CA	4	2	x0	0.000970875	slow
-2.655	CPK3CA	4	2	x0	0.00201225	slow
-2.77518	CPK3CA	4	2	x0	0.00114778	slow
-2.12058	CPK3CA	4	2	x0	0.00973785	slow
-2.33635	CPK3CA	4	2	x0	0.00794741	slow
-2.21146	CPK3CA	4	2	x0	0.0947228	slow
-2.11688	CPK3CA	4	2	x0	7e-05	slow
-2.23772	CPK3CA	4	2	x0	6.09e-05	slow
-2.14232	CPK3CA	4	2	x0	-0.00163196	slow
-2.31032	CPK3CA	4	2	x0	9.86e-05	slow
-3.04878	CPK3CA	4	2	x0	0.000729055	slow
-2.50968	CPK3CA	4	2	x0	0.000198924	slow
-2.91973	CPK3CA	4	2	x0	0.00289072	slow
-2.22624	CPK3CA	4	2	x0	0.00538527	slow
-3.15817	CPK3CA	4	2	x0	0.0074646	slow
-2.38	CPK3CA	4	2	x0	0.00514105	slow
-4.26853	CPK3CA	4	2	x0	0.00213966	slow
-2.78304	CPK3CA	4	2	x0	0.000294783	slow
-2.11952	CPK3CA	4	2	x0	0.00251279	slow
-2.9312	CPK3CA	4	2	x0	0.00384525	slow
-4.31489	CPK3CA	4	2	x0	0.00398072	slow
-4.2732	CPK3CA	4	2	x0	0.00096405	slow
-4.72189	CPK3CA	4	2	x0	0.00140613	slow
-2.50491	CPK3CA	4	2	x0	0.00439416	slow
-2.13269	CPK3CA	4	2	x0	0.00736835	slow
-3.41199	CPK3CA	4	2	x0	0.00266593	slow
-2.54213	CPK3CA	4	2	x0	0.000431193	slow
-2.56079	CPK3CA	4	2	x0	0.00219819	slow
-2.69833	CPK3CA	4	2	x0	0.00180791	slow
-2.39672	CPK3CA	4	2	x0	-0.000434395	slow
-2.71304	CPK3CA	4	2	x0	0.00116921	slow
-2.4006	CPK3CA	4	2	x0	0.00192146	slow
-3.38633	CPK3CA	4	2	x0	0.00250994	slow
-2.78653	CPK3CA	4	2	x0	0.00174575	slow
-2.77072	CPK3CA	4	2	x0	0.00815419	slow
-2.57457	CPK3CA	4	2	x0	0.00358272	slow
-2.6921	CPK3CA	4	2	x0	0.109963	slow
-2.64403	CPK3CA	4	2	x0	0.0027721	slow
-2.56415	CPK3CA	4	2	x0	0.00118098	slow
-2.48664	CPK3CA	4	2	x0	0.00118527	slow
-2.56276	CPK3CA	4	2	x0	0.00107639	slow
-2.8783	CPK3CA	4	2	x0	0.0016965	slow
-2.48778	CPK3CA	4	2	x0	0.00272174	slow
-2.3206	CPK3CA	4	2	x0	0.000592515	slow
-2.20615	CPK3CA	4	2	x0	0.000554653	slow
-2.90974	CPK3CA	4	2	x0	0.00322721	slow
-2.18165	CPK3CA	4	2	x0	0.00227771	slow
-3.43215	CPK3CA	4	2	x0	0.00199634	slow
-2.55551	CPK3CA	4	2	x0	0.00121074	slow
-2.39212	CPK3CA	4	2	x0	0.00198022	slow
-2.26763	CPK3CA	4	2	x0	-0.000991155	slow
-2.47936	CPK3CA	4	2	x0	0.00539165	slow
-3.4687	CPK3CA	4	2	x0	0.000493464	slow
-3.09069	CPK3CA	4	2	x0	0.00344874	slow
-2.73466	CPK3CA	4	2	x0	0.00129887	slow
-3.15467	CPK3CA	4	2	x0	0.000607034	slow
-2.67918	CPK3CA	4	2	x0	-0.000185677	slow
-2.58094	CPK3CA	4	2	x0	0.0017102	slow
-2.5852	CPK3CA	4	2	x0	0.00224869	slow
-2.78028	CPK3CA	4	2	x0	0.000306352	slow
-4.2045	CPK3CA	4	2	x0	0.00561472	slow
-2.13323	CPK3CA	4	2	x0	0.00139818	slow
-2.71848	CPK3CA	4	2	x0	0.00170258	slow
-2.50823	CPK3CA	4	2	x0	0.00310697	slow
-2.07072	CPK3CA	4	2	x0	0.00201066	slow
-2.35882	CPK3CA	4	2	x0	0.00404518	slow
-2.37376	CPK3CA	4	2	x0	0.000227495	slow
-3.9582	CPK3CA	4	2	x0	0.00100565	slow
-2.79491	CPK3CA	4	2	x0	0.000360105	slow
-3.17531	CPK3CA	4	2	x0	0.00151157	slow
-3.19717	CPK3CA	4	2	x0	0.00556601	slow
-2.01078	CPK3CA	4	2	x0	-0.0011458	slow
-2.58495	CPK3CA	4	2	x0	0.00191647	slow
-3.20085	CPK3CA	4	2	x0	0.0011855	slow
-2.12819	CPK3CA	4	2	x0	0.0016255	slow
-2.82191	CPK3CA	4	2	x0	0.00265293	slow
-2.26774	CPK3CA	4	2	x0	0.0103329	slow
-2.15537	CPK3CA	4	2	x0	0.00460466	slow
-2.95825	CPK3CA	4	2	x0	0.00120493	slow
-2.59979	CPK3CA	4	2	x0	0.00156573	slow
-2.65823	CPK3CA	4	2	x0	0.00301098	slow
-3.64166	CPK3CA	4	2	x0	0.00153071	slow
-2.85609	CPK3CA	4	2	x0	0.000540937	slow
-2.5591	CPK3CA	4	2	x0	0.00211691	slow
-2.62211	CPK3CA	4	2	x0	0.00128315	slow
-2.29633	CPK3CA	4	2	x0	0.000915904	slow
-2.98865	CPK3CA	4	2	x0	0.00177764	slow
-2.60924	CPK3CA	4	2	x0	0.00140967	slow
-2.04643	CPK3CA	4	2	x0	0.0188984	slow
-2.58562	CPK3CA	4	2	x0	0.000212235	slow
-2.2586	CPK3CA	4	2	x0	-6.78e-06	slow
-2.97726	CPK3CA	4	2	x0	0.0025408	slow
-3.18904	CPK3CA	4	2	x0	0.00265988	slow
-2.81775	CPK3CA	4	2	x0	0.00340557	slow
-2.21238	CPK3CA	4	2	x0	-0.00154917	slow
-2.39423	CPK3CA	4	2	x0	0.00131719	slow
-2.7468	CPK3CA	4	2	x0	0.000667695	slow
-2.01396	CPK3CA	4	2	x0	0.0283519	slow
-2.63457	CPK3CA	4	2	x0	0.00595094	slow
-2.24766	CPK3CA	4	2	x0	0.00187486	slow
-2.87898	CPK3CA	4	2	x0	0.00529478	slow
-3.06093	CPK3CA	4	2	x0	0.00182302	slow
-2.59555	CPK3CA	4	2	x0	0.00282575	slow
-2.32192	CPK3CA	4	2	x0	0.00071765	slow
-2.67583	CPK3CA	4	2	x0	0.00245092	slow
-2.81054	CPK3CA	4	2	x0	0.000599943	slow
-2.75033	CPK3CA	4	2	x0	0.00490088	slow
-2.65819	CPK3CA	4	2	x0	0.00181825	slow
-2.46631	CPK3CA	4	2	x0	0.000791664	slow
-3.0492	CPK3CA	4	2	x0	0.00220735	slow
-3.30043	CPK3CA	4	2	x0	0.00162365	slow
-3.50491	CPK3CA	4	2	x0	0.00158998	slow
-3.23402	CPK3CA	4	2	x0	0.00129754	slow
-2.48978	CPK3CA	4	2	x0	0.000344793	slow
-2.53173	CPK3CA	4	2	x0	0.00393359	slow
-2.6063	CPK3CA	4	2	x0	0.00324676	slow
-2.76795	CPK3CA	4	2	x0	0.00152335	slow
-2.32745	CPK3CA	4	2	x0	0.00867977	slow
-2.07097	CPK3CA	4	2	x0	0.00188638	slow
-3.10531	CPK3CA	4	2	x0	0.000230796	slow
-2.61541	CPK3CA	4	2	x0	0.00394637	slow
-2.60134	CPK3CA	4	2	x0	0.00120836	slow
-3.25481	CPK3CA	4	2	x0	0.000816553	slow
-2.3884	CPK3CA	4	2	x0	0.00197705	slow
-2.57358	CPK3CA	4	2	x0	0.00154729	slow
-2.71731	CPK3CA	4	2	x0	0.00209935	slow
-2.52778	CPK3CA	4	2	x0	0.00221734	slow
-2.62225	CPK3CA	4	2	x0	0.00169727	slow
-2.67619	CPK3CA	4	2	x0	0.00192887	slow
-2.48517	CPK3CA	4	2	x0	0.000701078	slow
-2.72686	CPK3CA	4	2	x0	0.00106777	slow
-2.50954	CPK3CA	4	2	x0	0.000479833	slow
-3.06364	CPK3CA	4	2	x0	0.000570898	slow
-2.78525	CPK3CA	4	2	x0	0.00109209	slow
-2.08448	CPK3CA	4	2	x0	0.00178926	slow
-3.22073	CPK3CA	4	2	x0	0.000808795	slow
-3.49589	CPK3CA	4	2	x0	0.000118482	slow
-2.02997	CPK3CA	4	2	x0	-0.000832034	slow
-3.44798	CPK3CA	4	2	x0	0.00268007	slow
-2.58821	CPK3CA	4	2	x0	0.00268033	slow
-2.28128	CPK3CA	4	2	x0	0.00177714	slow
-2.17503	CPK3CA	4	2	x0	0.00145767	slow
-2.02586	CPK3CA	4	2	x0	-0.00180476	slow
-2.94791	CPK3CA	4	2	x0	0.00179885	slow
-3.03769	CPK3CA	4	2	x0	0.00332658	slow
-2.04604	CPK3CA	4	2	x0	0.00196729	slow
-2.44113	CPK3CA	4	2	x0	0.00854821	slow
-2.01732	CPK3CA	4	2	x0	0.00138738	slow
-2.48762	CPK3CA	4	2	x0	0.00424312	slow
-3.22179	CPK3CA	4	2	x0	0.0022903	slow
-2.41041	CPK3CA	4	2	x0	0.000732468	slow
-4.44894	CPK3CA	4	2	x0	0.00284116	slow
-3.71752	CPK3CA	4	2	x0	0.00119449	slow
-2.00202	CPK3CA	4	2	x0	9.27e-05	slow
-2.64485	CPK3CA	4	2	x0	0.001089	slow
-2.31649	CPK3CA	4	2	x0	0.00166178	slow
-2.09666	CPK3CA	4	2	x0	-0.00120708	slow
-4.00141	CPK3CA	4	2	x0	0.00116979	slow
-3.29815	CPK3CA	4	2	x0	0.00197167	slow
-3.29587	CPK3CA	4	2	x0	0.00217949	slow
-2.34502	CPK3CA	4	2	x0	0.00210562	slow
-2.51019	CPK3CA	4	2	x0	0.00332296	slow
-3.30265	CPK3CA	4	2	x0	0.00192952	slow
-3.04748	CPK3CA	4	2	x0	0.00202274	slow
-3.37928	CPK3CA	4	2	x0	0.00218967	slow
-2.88088	CPK3CA	4	2	x0	0.00309305	slow
-2.03201	CPK3CA	4	2	x0	-0.000966893	slow
-2.20749	CPK3CA	4	2	x0	0.0247996	slow
-3.52234	CPK3CA	4	2	x0	0.00142048	slow
-2.72587	CPK3CA	4	2	x0	0.00128346	slow
-2.04293	CPK3CA	4	2	x0	0.114347	slow
-2.1404	CPK3CA	4	2	x0	0.00575108	slow
-2.4452	CPK3CA	4	2	x0	-5.53e-05	slow
-2.52998	CPK3CA	4	2	x0	0.000860348	slow
-3.20921	CPK3CA	4	2	x0	0.00479211	slow
-3.18092	CPK3CA	4	2	x0	0.000699946	slow
-2.57458	CPK3CA	4	2	x0	0.00119902	slow
-2.96196	CPK3CA	4	2	x0	0.0014249	slow
-3.36583	CPK3CA	4	2	x0	0.00668382	slow
-2.02107	CPK3CA	4	2	x0	0.0310165	slow
-2.29741	CPK3CA	4	2	x0	0.00184487	slow
-2.39984	CPK3CA	4	2	x0	0.000627395	slow
-2.52634	CPK3CA	4	2	x0	0.00163158	slow
-2.97946	CPK3CA	4	2	x0	0.000313999	slow
-2.84863	CPK3CA	4	2	x0	0.00162487	slow
-2.59724	CPK3CA	4	2	x0	0.00239745	slow
-2.42833	CPK3CA	4	2	x0	0.00117632	slow
-2.41013	CPK3CA	4	2	x0	-6.75e-05	slow
-2.8272	CPK3CA	4	2	x0	0.00163352	slow
-2.71883	CPK3CA	4	2	x0	0.000698457	slow
-2.4644	CPK3CA	4	2	x0	0.00127255	slow
-3.61434	CPK3CA	4	2	x0	0.0102657	slow
-2.28108	CPK3CA	4	2	x0	0.00184621	slow
-3.16175	CPK3CA	4	2	x0	0.000740555	slow
-2.01938	CPK3CA	4	2	x0	-0.000658403	slow
-2.0017	CPK3CA	4	2	x0	-0.000501762	slow
-2.0388	CPK3CA	4	2	x0	-0.00177343	slow
-3.00822	CPK3CA	4	2	x0	0.00344674	slow
-2.53395	CPK3CA	4	2	x0	0.000323667	slow
-3.08895	CPK3CA	4	2	x0	0.000969171	slow
-3.50515	CPK3CA	4	2	x0	0.00399988	slow
-3.307	CPK3CA	4	2	x0	0.00195696	slow
-2.74677	CPK3CA	4	2	x0	0.000907645	slow
-2.43496	CPK3CA	4	2	x0	0.000211433	slow
-2.79857	CPK3CA	4	2	x0	0.00146765	slow
-2.44061	CPK3CA	4	2	x0	0.0125663	slow
-3.36882	CPK3CA	4	2	x0	0.00307031	slow
-2.38833	CPK3CA	4	2	x0	0.0284618	slow
-2.18285	CPK3CA	4	2	x0	-0.000181712	slow
-2.30491	CPK3CA	4	2	x0	0.0114156	slow
-2.83329	CPK3CA	4	2	x0	0.00438747	slow
-3.2531	CPK3CA	4	2	x0	0.00363585	slow
-3.91116	CPK3CA	4	2	x0	0.00204422	slow
-3.06137	CPK3CA	4	2	x0	0.00347806	slow
-3.04805	CPK3CA	4	2	x0	0.00131216	slow
-3.06598	CPK3CA	4	2	x0	0.000267394	slow
-3.89161	CPK3CA	4	2	x0	0.000744028	slow
-3.06686	CPK3CA	4	2	x0	0.00309699	slow
-2.4888	CPK3CA	4	2	x0	0.00250399	slow
-2.31161	CPK3CA	4	2	x0	0.00164186	slow
-2.13276	CPK3CA	4	2	x0	-0.00143951	slow
-2.47204	CPK3CA	4	2	x0	0.000556553	slow
-2.51741	CPK3CA	4	2	x0	0.00144707	slow
-2.66801	CPK3CA	4	2	x0	0.000343409	slow
-3.35137	CPK3CA	4	2	x0	0.00311421	slow
-2.06843	CPK3CA	4	2	x0	0.000259916	slow
-2.53259	CPK3CA	4	2	x0	0.00516591	slow
-2.02345	CPK3CA	4	2	x0	-0.00159268	slow
-3.43243	CPK3CA	4	2	x0	0.00330223	slow
-2.75217	CPK3CA	4	2	x0	0.00161439	slow
-2.46794	CPK3CA	4	2	x0	-0.000511604	slow
-2.14651	CPK3CA	4	2	x0	0.0139841	slow
-3.49561	CPK3CA	4	2	x0	0.00128828	slow
-2.09383	CPK3CA	4	2	x0	0.0250049	slow
-3.08844	CPK3CA	4	2	x0	0.00171763	slow
-2.46729	CPK3CA	4	2	x0	0.00119229	slow
-2.5831	CPK3CA	4	2	x0	0.00176926	slow
-2.1572	CPK3CA	4	2	x0	0.00494209	slow
-2.24236	CPK3CA	4	2	x0	0.00153986	slow
-3.507	CPK3CA	4	2	x0	0.000540039	slow
-2.44407	CPK3CA	4	2	x0	0.00264185	slow
-2.30161	CPK3CA	4	2	x0	0.00169497	slow
-3.0351	CPK3CA	4	2	x0	0.00112672	slow
-2.55443	CPK3CA	4	2	x0	0.00930023	slow
-2.37096	CPK3CA	4	2	x0	0.000436158	slow
-3.65381	CPK3CA	4	2	x0	0.00289172	slow
-2.74761	CPK3CA	4	2	x0	0.0005939	slow
-2.12389	CPK3CA	4	2	x0	0.0129746	slow
-2.65423	CPK3CA	4	2	x0	0.00174719	slow
-2.99898	CPK3CA	4	2	x0	0.00187876	slow
-3.72703	CPK3CA	4	2	x0	0.0441246	slow
-3.3097	CPK3CA	4	2	x0	0.00321707	slow
-2.58311	CPK3CA	4	2	x0	0.000201042	slow
-2.50413	CPK3CA	4	2	x0	-0.00027077	slow
-2.66581	CPK3CA	4	2	x0	0.00194124	slow
-2.48363	CPK3CA	4	2	x0	-5.56e-05	slow
-2.38994	CPK3CA	4	2	x0	0.00109098	slow
-3.17662	CPK3CA	4	2	x0	0.00172099	slow
-2.6452	CPK3CA	4	2	x0	-3.86e-05	slow
-2.39475	CPK3CA	4	2	x0	0.00375219	slow
-2.06427	CPK3CA	4	2	x0	0.00106543	slow
-3.04789	CPK3CA	4	2	x0	0.0014855	slow
-3.02176	CPK3CA	4	2	x0	0.00019825	slow
-2.26747	CPK3CA	4	2	x0	5.29e-05	slow
-2.92599	CPK3CA	4	2	x0	0.00116986	slow
-2.10931	CPK3CA	4	2	x0	0.00760652	slow
-2.08674	CPK3CA	4	2	x0	-0.00164054	slow
-3.48248	CPK3CA	4	2	x0	0.00143878	slow
-2.51471	CPK3CA	4	2	x0	0.00222337	slow
-2.70006	CPK3CA	4	2	x0	0.000572137	slow
-2.15648	CPK3CA	4	2	x0	0.000167327	slow
-2.16153	CPK3CA	4	2	x0	0.00470216	slow
-2.88854	CPK3CA	4	2	x0	0.00144289	slow
-3.11065	CPK3CA	4	2	x0	0.0020669	slow
-2.1142	CPK3CA	4	2	x0	0.00609408	slow
-3.25145	CPK3CA	4	2	x0	0.000910977	slow
-2.2114	CPK3CA	4	2	x0	0.00174607	slow
-2.8979	CPK3CA	4	2	x0	0.000810029	slow
-3.20479	CPK3CA	4	2	x0	0.000551382	slow
-2.1527	CPK3CA	4	2	x0	-0.000644074	slow
-2.31736	CPK3CA	4	2	x0	0.00116981	slow
-2.09812	CPK3CA	4	2	x0	-0.000911305	slow
-2.55683	CPK3CA	4	2	x0	0.000622291	slow
-3.0268	CPK3CA	4	2	x0	0.00182948	slow
-3.25596	CPK3CA	4	2	x0	0.0041586	slow
-2.38628	CPK3CA	4	2	x0	0.0021414	slow
-2.77594	CPK3CA	4	2	x0	0.000696141	slow
-2.23589	CPK3CA	4	2	x0	0.00296704	slow
-2.91888	CPK3CA	4	2	x0	0.00105732	slow
-3.13756	CPK3CA	4	2	x0	0.000603871	slow
-3.01599	CPK3CA	4	2	x0	0.000706861	slow
-2.86661	CPK3CA	4	2	x0	0.00204715	slow
-3.16481	CPK3CA	4	2	x0	0.000854771	slow
-2.49282	CPK3CA	4	2	x0	0.00102137	slow
-2.49346	CPK3CA	4	2	x0	0.000969893	slow
-2.41787	CPK3CA	4	2	x0	0.00342621	slow
-3.12822	CPK3CA	4	2	x0	0.00161614	slow
-2.03312	CPK3CA	4	2	x0	0.00409078	slow
-3.02379	CPK3CA	4	2	x0	0.0022635	slow
-2.845	CPK3CA	4	2	x0	0.00150227	slow
-2.87861	CPK3CA	4	2	x0	0.00204073	slow
-3.11496	CPK3CA	4	2	x0	0.00149033	slow
-2.60281	CPK3CA	4	2	x0	0.00206677	slow
-2.15742	CPK3CA	4	2	x0	-0.000800831	slow
-2.37351	CPK3CA	4	2	x0	0.00110043	slow
-2.11546	CPK3CA	4	2	x0	0.00333858	slow
-2.53191	CPK3CA	4	2	x0	0.01737	slow
-3.78352	CPK3CA	4	2	x0	0.000996351	slow
-2.08206	CPK3CA	4	2	x0	0.0121315	slow
-3.09968	CPK3CA	4	2	x0	0.00185673	slow
-2.732	CPK3CA	4	2	x0	0.0107462	slow
-2.02536	CPK3CA	4	2	x0	-0.000279965	slow
-3.1539	CPK3CA	4	2	x0	0.00170287	slow
-3.32721	CPK3CA	4	2	x0	0.00167753	slow
-2.81017	CPK3CA	4	2	x0	0.00334869	slow
-2.47094	CPK3CA	4	2	x0	0.00462773	slow
-2.50909	CPK3CA	4	2	x0	0.00153386	slow
-2.72286	CPK3CA	4	2	x0	0.00178226	slow
-2.43279	CPK3CA	4	2	x0	0.00223146	slow
-2.21637	CPK3CA	4	2	x0	-0.000934567	slow
-3.34457	CPK3CA	4	2	x0	0.00135382	slow
-2.81105	CPK3CA	4	2	x0	0.000794396	slow
-2.70275	CPK3CA	4	2	x0	0.00548964	slow
-2.44766	CPK3CA	4	2	x0	0.00345034	slow
-3.39303	CPK3CA	4	2	x0	0.00172939	slow
-4.40526	CPK3CA	4	2	x0	0.00319492	slow
-2.36981	CPK3CA	4	2	x0	-0.000827645	slow
-2.75049	CPK3CA	4	2	x0	0.0026565	slow
-2.04225	CPK3CA	4	2	x0	0.00101684	slow
-3.14173	CPK3CA	4	2	x0	0.00231413	slow
-3.21781	CPK3CA	4	2	x0	0.00179118	slow
-3.27962	CPK3CA	4	2	x0	0.00275949	slow
-2.86863	CPK3CA	4	2	x0	0.00202998	slow
-2.99877	CPK3CA	4	2	x0	0.0006115	slow
-2.2003	CPK3CA	4	2	x0	0.000657219	slow
-3.24636	CPK3CA	4	2	x0	0.00564323	slow
-2.13073	CPK3CA	4	2	x0	0.00312272	slow
-3.26573	CPK3CA	4	2	x0	0.00160406	slow
-3.76414	CPK3CA	4	2	x0	0.00262242	slow
-3.34997	CPK3CA	4	2	x0	0.00100078	slow
-2.52901	CPK3CA	4	2	x0	0.000949322	slow
-2.61348	CPK3CA	4	2	x0	0.00085213	slow
-2.43278	CPK3CA	4	2	x0	-0.00013302	slow
-2.72903	CPK3CA	4	2	x0	0.00299515	slow
-2.35324	CPK3CA	4	2	x0	0.000280061	slow
-2.13311	CPK3CA	4	2	x0	0.211236	slow
-3.17033	CPK3CA	4	2	x0	0.000914784	slow
-2.10333	CPK3CA	4	2	x0	0.0869763	slow
-2.67206	CPK3CA	4	2	x0	0.00285592	slow
-3.32188	CPK3CA	4	2	x0	0.000284859	slow
-3.49754	CPK3CA	4	2	x0	0.00223627	slow
-2.51369	CPK3CA	4	2	x0	0.00046213	slow
-2.90526	CPK3CA	4	2	x0	0.00172128	slow
-2.24891	CPK3CA	4	2	x0	0.00280545	slow
-2.16659	CPK3CA	4	2	x0	0.000400182	slow
-2.3128	CPK3CA	4	2	x0	0.0028241	slow
-2.42441	CPK3CA	4	2	x0	0.205685	slow
-2.96322	CPK3CA	4	2	x0	0.103313	slow
-2.73163	CPK3CA	4	2	x0	0.00137239	slow
-2.14618	CPK3CA	4	2	x0	0.442909	slow
-2.69461	CPK3CA	4	2	x0	0.0020528	slow
-2.00121	CPK3CA	4	2	x0	-0.000261328	slow
-2.47018	CPK3CA	4	2	x0	0.00270861	slow
-3.39226	CPK3CA	4	2	x0	0.00174175	slow
-2.9791	CPK3CA	4	2	x0	0.00162647	slow
-2.21523	CPK3CA	4	2	x0	0.000439939	slow
-2.20143	CPK3CA	4	2	x0	0.00249367	slow
-2.0106	CPK3CA	4	2	x0	0.000951595	slow
-2.37174	CPK3CA	4	2	x0	0.000406101	slow
-2.42618	CPK3CA	4	2	x0	0.0421806	slow
-3.34409	CPK3CA	4	2	x0	0.00337171	slow
-2.07679	CPK3CA	4	2	x0	0.00503507	slow
-2.16719	CPK3CA	5	2	x0	0.00142023	slow
-2.29125	CPK3CA	5	2	x0	0.000977024	slow
-2.49654	CPK3CA	5	2	x0	0.00255823	slow
-2.5168	CPK3CA	5	2	x0	0.0406352	slow
-2.41806	CPK3CA	5	2	x0	0.00231532	slow
-2.75802	CPK3CA	5	2	x0	0.000548522	slow
-2.32758	CPK3CA	5	2	x0	0.0021297	slow
-2.05238	CPK3CA	5	2	x0	0.00186506	slow
-2.04416	CPK3CA	5	2	x0	0.00565077	slow
-2.66406	CPK3CA	5	2	x0	0.000585146	slow
-2.55506	CPK3CA	5	2	x0	0.00109115	slow
-2.08921	CPK3CA	5	2	x0	0.00356263	slow
-3.17526	CPK3CA	5	2	x0	0.00193081	slow
-2.2746	CPK3CA	5	2	x0	0.0206693	slow
-2.49496	CPK3CA	5	2	x0	0.00183935	slow
-2.04866	CPK3CA	5	2	x0	0.00583296	slow
-2.46621	CPK3CA	5	2	x0	0.00461911	slow
-2.07147	CPK3CA	5	2	x0	-0.000560158	slow
-2.11735	CPK3CA	5	2	x0	0.00720038	slow
-2.27417	CPK3CA	5	2	x0	0.000476662	slow
-3.25208	CPK3CA	5	2	x0	0.00138435	slow
-2.82098	CPK3CA	5	2	x0	0.00144757	slow
-2.29204	CPK3CA	5	2	x0	0.00779723	slow
-2.06231	CPK3CA	5	2	x0	0.00364706	slow
-2.37676	CPK3CA	5	2	x0	0.0853857	slow
-2.30863	CPK3CA	5	2	x0	0.00180924	slow
-2.55643	CPK3CA	5	2	x0	0.003972	slow
-2.00022	CPK3CA	5	2	x0	0.00674447	slow
-4.34528	CPK3CA	5	2	x0	0.00319321	slow
-2.21859	CPK3CA	5	2	x0	0.00632597	slow
-2.30364	CPK3CA	5	2	x0	0.00134343	slow
-2.01528	CPK3CA	5	2	x0	0.00574872	slow
-3.05105	CPK3CA	5	2	x0	0.00289581	slow
-3.35896	CPK3CA	5	2	x0	0.00436332	slow
-3.00414	CPK3CA	5	2	x0	0.00966775	slow
-2.49312	CPK3CA	5	2	x0	0.000858026	slow
-2.51475	CPK3CA	5	2	x0	0.00222018	slow
-2.65347	CPK3CA	5	2	x0	0.00440254	slow
-2.39781	CPK3CA	5	2	x0	1.5622e-05	slow
-2.20186	CPK3CA	5	2	x0	-0.000383323	slow
-2.35794	CPK3CA	5	2	x0	0.0106031	slow
-2.2341	CPK3CA	5	2	x0	0.00157958	slow
-2.59939	CPK3CA	5	2	x0	0.00420016	slow
-2.26026	CPK3CA	5	2	x0	0.00324855	slow
-2.93508	CPK3CA	5	2	x0	0.000277027	slow
-3.17882	CPK3CA	5	2	x0	0.00632343	slow
-2.7028	CPK3CA	5	2	x0	0.00357727	slow
-3.20434	CPK3CA	5	2	x0	0.00264545	slow
-2.24787	CPK3CA	5	2	x0	0.00162996	slow
-2.15569	CPK3CA	5	2	x0	0.3725	slow
-3.07863	CPK3CA	5	2	x0	0.00295429	slow
-2.73885	CPK3CA	5	2	x0	0.00530751	slow
-2.58964	CPK3CA	5	2	x0	0.000477077	slow
-2.29262	CPK3CA	5	2	x0	0.0022393	slow
-2.7268	CPK3CA	5	2	x0	0.00427381	slow
-2.25043	CPK3CA	5	2	x0	0.00102084	slow
-2.92861	CPK3CA	5	2	x0	0.00188633	slow
-2.84217	CPK3CA	5	2	x0	0.0955015	slow
-2.85708	CPK3CA	5	2	x0	0.00329323	slow
-2.81126	CPK3CA	5	2	x0	0.0222378	slow
-2.89867	CPK3CA	5	2	x0	0.00592226	slow
-2.42305	CPK3CA	5	2	x0	0.000246161	slow
-2.08476	CPK3CA	5	2	x0	0.000680666	slow
-4.20451	CPK3CA	5	2	x0	0.0034764	slow
-2.6987	CPK3CA	5	2	x0	0.00407594	slow
-3.53338	CPK3CA	5	2	x0	0.00150764	slow
-2.02751	CPK3CA	5	2	x0	0.000537873	slow
-3.05527	CPK3CA	5	2	x0	0.00248906	slow
-2.38755	CPK3CA	5	2	x0	0.101567	slow
-2.34849	CPK3CA	5	2	x0	0.000870878	slow
-2.4021	CPK3CA	5	2	x0	0.00232278	slow
-2.91806	CPK3CA	5	2	x0	0.00111496	slow
-2.55954	CPK3CA	5	2	x0	0.0022171	slow
-3.29033	CPK3CA	5	2	x0	0.0035647	slow
-3.54519	CPK3CA	5	2	x0	0.00274297	slow
-2.91931	CPK3CA	5	2	x0	0.00146689	slow
-2.40436	CPK3CA	5	2	x0	0.00197623	slow
-2.49863	CPK3CA	5	2	x0	0.00255659	slow
-2.49765	CPK3CA	5	2	x0	0.00105676	slow
-2.55242	CPK3CA	5	2	x0	0.00189846	slow
-2.57625	CPK3CA	5	2	x0	0.0025868	slow
-3.09291	CPK3CA	5	2	x0	0.0172966	slow
-3.07514	CPK3CA	5	2	x0	0.00262297	slow
-2.92562	CPK3CA	5	2	x0	0.00100221	slow
-3.09378	CPK3CA	5	2	x0	0.00700905	slow
-2.9249	CPK3CA	5	2	x0	0.00022284	slow
-2.0062	CPK3CA	5	2	x0	0.00246588	slow
-2.48696	CPK3CA	5	2	x0	0.000725954	slow
-2.35121	CPK3CA	5	2	x0	0.0168409	slow
-2.9787	CPK3CA	5	2	x0	0.00225579	slow
-2.62946	CPK3CA	5	2	x0	0.0168422	slow
-2.23529	CPK3CA	5	2	x0	0.00473838	slow
-2.43468	CPK3CA	5	2	x0	0.00334472	slow
-2.33945	CPK3CA	5	2	x0	0.00210229	slow
-3.0373	CPK3CA	5	2	x0	0.00231074	slow
-2.63793	CPK3CA	5	2	x0	0.00157448	slow
-3.42103	CPK3CA	5	2	x0	0.0012396	slow
-2.24762	CPK3CA	5	2	x0	0.00315068	slow
-2.0847	CPK3CA	5	2	x0	0.0744516	slow
-2.42041	CPK3CA	5	2	x0	0.00216015	slow
-3.52236	CPK3CA	5	2	x0	0.00416521	slow
-2.38657	CPK3CA	5	2	x0	0.000432845	slow
-2.15339	CPK3CA	5	2	x0	0.0419528	slow
-2.07043	CPK3CA	5	2	x0	0.00289416	slow
-2.50358	CPK3CA	5	2	x0	0.00970621	slow
-2.72302	CPK3CA	5	2	x0	0.00216436	slow
-2.31098	CPK3CA	5	2	x0	0.00217853	slow
-2.59634	CPK3CA	5	2	x0	0.000963517	slow
-2.89456	CPK3CA	5	2	x0	0.00287036	slow
-2.3986	CPK3CA	5	2	x0	0.00785108	slow
-3.60401	CPK3CA	5	2	x0	0.00238488	slow
-2.87906	CPK3CA	5	2	x0	0.000492124	slow
-3.58149	CPK3CA	5	2	x0	0.00419196	slow
-3.02077	CPK3CA	5	2	x0	0.00117973	slow
-2.32433	CPK3CA	5	2	x0	0.0442891	slow
-2.03012	CPK3CA	5	2	x0	0.103326	slow
-2.27111	CPK3CA	5	2	x0	0.00125612	slow
-2.66858	CPK3CA	5	2	x0	0.00845085	slow
-2.32796	CPK3CA	5	2	x0	0.00184899	slow
[truncated: 223,161+ more rows]
