# Supplementary material for: Interdependence of plasma membrane nanoscale dynamics of a kinase and its cognate substrate underlies Arabidopsis response to viral infection
Source: eLife. 2025 May 2;12:RP90309. doi: 10.7554/eLife.90309 (PMC12048157; doi:10.7554/eLife.90309)
Supplement: Figure 4—source data 1. [file elife-90309-fig4-data1.xlsx]

## Sheet: Feuil1
genotype	Foci area (% of Col-0)
Col-0	52.1557
Col-0	11.1399
Col-0	74.4151
Col-0	57.1258
Col-0	124.214
Col-0	209.07
Col-0	134.71
Col-0	96.9815
Col-0	228.593
Col-0	41.004
Col-0	125.211
Col-0	50.4654
Col-0	79.9926
Col-0	204.008
Col-0	88.927
Col-0	41.5127
Col-0	63.6058
Col-0	62.4972
Col-0	52.3511
Col-0	124.27
Col-0	96.5286
Col-0	285.232
Col-0	59.3468
Col-0	196.099
Col-0	50.1483
Col-0	16.7008
Col-0	36.6449
Col-0	90.8492
Col-0	47.2157
Col-0	16.4136
Col-0	333.375
Col-0	105.685
Col-0	333.547
Col-0	138.496
Col-0	49.5612
Col-0	55.8991
Col-0	42.0257
Col-0	210.933
Col-0	87.0186
Col-0	98.6284
Col-0	85.3481
Col-0	70.4604
Col-0	107.336
Col-0	23.3506
Col-0	131.337
Col-0	75.0294
Col-0	93.0214
Col-0	66.7764
Col-0	85.949
Col-0	43.8572
Col-0	93.1816
Col-0	51.4925
Col-0	59.3291
Col-0	37.6052
Col-0	130.02
Col-0	56.8059
Col-0	216.501
Col-0	35.3568
Col-0	20.1207
Col-0	37.4758
Col-0	72.476
Col-0
Col-0	57.6791
Col-0	73.9863
Col-0	133.217
Col-0	47.0493
Col-0	172.767
Col-0	18.9596
Col-0	83.2275
Col-0	255.028
Col-0	114.867
Col-0	105.287
Col-0	79.6087
Col-0	99.1664
Col-0	100.403
Col-0	120.52
Col-0	51.3169
Col-0	64.2213
Col-0	108.2
Col-0	134.742
Col-0	110.296
Col-0	255.364
Col-0	255.364
Col-0	83.2815
Col-0	37.3721
Col-0	130.191
Col-0	23.7533
Col-0	36.6005
Col-0	24.7799
Col-0	243.631
Col-0	112.017
Col-0	174.613
Col-0	248.916
Col-0	33.2156
Col-0	127.742
Col-0	66.8695
Col-0	72.7691
Col-0	70.3506
Col-0	182.159
Col-0	195.144
Col-0
Col-0
Col-0	68.7365
Col-0	19.8889
Col-0	44.4805
Col-0	40.9909
Col-0	92.0527
Col-0	18.9544
Col-0	257.623
Col-0	257.623
Col-0	47.822
Col-0	48.2146
Col-0	146.418
Col-0	295.042
Col-0	205.275
Col-0	116.256
Col-0	59.0773
Col-0	70.81
Col-0	56.5656
Col-0	55.5538
Col-0	47.624
Col-0	26.9751
Col-0	39.3969
Col-0	31.7254
Col-0	50.8946
Col-0	22.6313
Col-0	83.9758
Col-0	22.7785
Col-0	71.589
Col-0	313.541
Col-0	89.0756
Col-0	28.3045
Col-0	83.7073
Col-0	87.9349
Col-0	129.374
Col-0	85.9693
Col-0	169.084
Col-0	90.0242
Col-0	53.4759
Col-0	65.9793
Col-0	136.768
Col-0	81.1757
Col-0	158.312
Col-0	39.8184
Col-0	76.7514
Col-0	51.1676
Col-0	141.769
Col-0	53.0912
Col-0	61.9397
Col-0	164.852
Col-0
Col-0	39.8184
Col-0	100.796
Col-0	181.01
Col-0	121.764
Col-0	205.248
Col-0	45.0121
Col-0	72.1348
Col-0	72.1348
Col-0	78.4827
Col-0	62.7092
Col-0	256.992
Col-0
Col-0	434.54
Col-0	35.2018
Col-0	94.8332
Col-0	106.375
Col-0	80.0215
Col-0	79.2521
Col-0	40.0108
Col-0	48.6669
Col-0
Col-0	20.5825
Col-0	150.81
Col-0	25.7762
Col-0	65.5946
Col-0	165.429
Col-0	79.8292
Col-0	61.1703
Col-0	69.6341
Col-0	45.0121
Col-0	37.8948
Col-0	140.23
Col-0	75.7896
Col-0	56.3613
Col-0	80.5986
Col-0	176.971
Col-0	169.661
Col-0	50.7829
Col-0	100.027
Col-0	104.066
Col-0	239.103
Col-0	109.837
Col-0	81.1757
Col-0	44.2427
Col-0	100.796
Col-0	69.057
Col-0	50.7829
Col-0	52.1294
Col-0	47.5128
Col-0	152.541
Col-0
Col-0	243.527
Col-0	181.972
Col-0	53.0912
Col-0	60.4009
Col-0	46.551
Col-0	120.802
Col-0	42.7038
Col-0	119.84
Col-0	63.2863
Col-0	58.2849
Col-0	51.7447
Col-0	35.2018
Col-0	135.036
Col-0	82.7146
Col-0	241.411
Col-0	71.5577
Col-0	28.8539
Col-0	165.044
Col-0	55.0148
Col-0	111.184
Col-0	76.9438
Col-0	241.219
Col-0	116.57
Col-0	152.156
Col-0	101.181
Col-0	71.3654
Col-0	64.8251
Col-0	32.3164
Col-0	57.1308
Col-0	218.905
Col-0	21.7366
Col-0	111.953
Col-0	65.0175
Col-0	79.0597
Col-0	151.387
Col-0	133.497
Col-0	88.1006
Col-0
Col-0	67.9029
Col-0	88.4854
Col-0	289.309
Col-0	187.166
Col-0	61.1703
Col-0	132.728
Col-0	118.301
Col-0	129.65
Col-0	113.877
Col-0	30.2004
Col-0	30.3928
Col-0	50.2058
Col-0	345.285
Col-0	87.1388
Col-0	54.053
Col-0	21.5443
Col-0	26.3532
Col-0	83.6764
Col-0	45.3968
Col-0	75.982
Col-0
Col-0
Col-0	330.285
Col-0	157.567
Col-0	112.164
Col-0	50.6591
Col-0	90.3484
Col-0	45.754
Col-0	274.094
Col-0
Col-0	23.0701
Col-0	86.5577
Col-0	272.371
Col-0	120.924
Col-0	177.532
Col-0	122.946
Col-0	136.957
Col-0	124.629
Col-0	44.7807
Col-0	31.2652
Col-0	81.9988
Col-0	74.5068
Col-0	37.3472
Col-0	35.4286
Col-0	41.1006
Col-0	37.8399
Col-0	99.7325
Col-0	30.0962
Col-0	27.617
Col-0	86.7548
Col-0	458.16
Col-0	89.1323
Col-0	78.3814
Col-0	81.4396
Col-0	123.806
Col-0	31.818
Col-0	129.248
Col-0	122.303
Col-0	28.8157
Col-0	58.2063
Col-0	22.3238
Col-0	76.3512
Col-0	207.951
Col-0	42.0541
Col-0	188.187
Col-0	31.1062
Col-0	83.383
Col-0	160.58
Col-0	24.2392
Col-0	118.758
Col-0	21.896
Col-0	55.6238
Col-0	291.294
Col-0	49.8256
Col-0	75.8309
Col-0	108.023
Col-0	89.7461
Col-0	11.9539
Col-0	16.0043
Col-0	50.5991
Col-0	73.5783
Col-0	37.1694
Col-0	99.2231
Col-0	91.13
Col-0	105.531
Col-0	34.7327
Col-0	97.0956
Col-0	39.0769
Col-0	59.6898
Col-0	41.4882
Col-0	36.5663
Col-0	71.5997
Col-0	31.1067
Col-0	25.4073
Col-0	148.487
Col-0	51.038
Col-0	49.354
Col-0
Col-0	15.1294
Col-0	86.5971
Col-0	29.5748
Col-0	172.939
Col-0	33.4578
Col-0	15.7445
Col-0	50.4142
Col-0	20.5744
Col-0	43.4307
Col-0	121.641
Col-0	110.714
Col-0	142.546
Col-0	102.237
Col-0	102.259
Col-0	98.8986
Col-0	96.3457
Col-0	156.072
Col-0	76.2611
Col-0	143.869
Col-0	79.659
Col-0	198.405
Col-0	178.259
Col-0	124.966
Col-0	134.744
Col-0	164.307
Col-0	128.737
Col-0	129.066
Col-0	27.3684
Col-0	143.546
Col-0	54.499
Col-0	202.353
Col-0	236.28
Col-0	143.715
Col-0	256.409
Col-0	89.7261
Col-0	84.3026
Col-0	89.1576
Col-0	39.5892
Col-0	63.1049
Col-0	91.5198
Col-0	244.082
Col-0	103.483
Col-0	99.6861
Col-0	154.177
Col-0	266.942
Col-0	113.996
Col-0	46.9403
Col-0	118.6
Col-0	94.6529
Col-0	48.874
Col-0	36.9668
Col-0	59.135
Col-0	59.0696
Col-0	223.45
Col-0	60.1665
Col-0	74.2943
Col-0	110.889
Col-0	185.642
Col-0	147.661
Col-0
Col-0	54.4189
Col-0	64.5121
Col-0	141.152
Col-0	73.3415
Col-0	221.238
Col-0	181.776
Col-0	295.638
Col-0	115.65
Col-0	170.341
Col-0	220.362
Col-0	97.7152
Col-0	134.313
Col-0	100.39
Col-0	73.3686
Col-0	69.6368
Col-0	95.9418
Col-0	217.81
Col-0	228.639
Col-0	229.651
Col-0	453.808
Col-0	61.5461
Col-0	27.0794
Col-0	18.772
Col-0	90.8303
Col-0	37.4587
Col-0	28.2948
Col-0	28.1401
Col-0	42.9918
Col-0	28.7305
Col-0	33.5361
Col-0	79.2282
Col-0	59.181
Col-0	64.1153
Col-0	68.0678
Col-0	47.1703
Col-0	190.336
Col-0	20.9184
Col-0	14.647
Col-0	62.969
Col-0	24.3358
Col-0	30.5784
Col-0	34.2865
Col-0	33.6758
Col-0	35.8287
Col-0	35.6605
Col-0	58.1984
Col-0
Col-0	214.902
Col-0	26.4405
Col-0	450.036
Col-0
Col-0	47.1562
Col-0	35.6845
Col-0	41.008
Col-0	197.213
Col-0	102.782
Col-0	67.9354
Col-0	37.4827
Col-0	62.4279
Col-0	198.424
Col-0	71.7943
Col-0	121.732
Col-0	189.189
Col-0	23.7222
Col-0	64.8349
Col-0	175.592
Col-0	106.581
Col-0	19.5979
Col-0	77.4366
Col-0	86.822
Col-0	95.6687
Col-0	179.719
Col-0	31.9731
Col-0	79.9107
Col-0	25.5586
Col-0	71.2961
atrem1.2KO	27.7312
atrem1.2KO	16.5295
atrem1.2KO	33.0865
atrem1.2KO	22.6261
atrem1.2KO	63.7472
atrem1.2KO	16.3018
atrem1.2KO	18.0573
atrem1.2KO	13.6193
atrem1.2KO	62.6668
atrem1.2KO	18.8793
atrem1.2KO	50.1181
atrem1.2KO	168.46
atrem1.2KO	82.3657
atrem1.2KO	32.6371
atrem1.2KO	151.496
atrem1.2KO	61.2798
atrem1.2KO	94.4032
atrem1.2KO	36.5615
atrem1.2KO	19.6539
atrem1.2KO	33.2497
atrem1.2KO	159.358
atrem1.2KO	166.302
atrem1.2KO	84.92
atrem1.2KO	91.1651
atrem1.2KO	20.6572
atrem1.2KO	125.156
atrem1.2KO	321.293
atrem1.2KO	142.937
atrem1.2KO	132.076
atrem1.2KO	135.93
atrem1.2KO	39.8501
atrem1.2KO	166.91
atrem1.2KO	192.338
atrem1.2KO	110.199
atrem1.2KO	147.428
atrem1.2KO	119.284
atrem1.3KO	84.2644
atrem1.3KO	117.424
atrem1.3KO	74.2145
atrem1.3KO	61.4344
atrem1.3KO	132.522
atrem1.3KO	78.5698
atrem1.3KO	63.4552
atrem1.3KO	258.49
atrem1.3KO	131.902
atrem1.3KO	200.57
atrem1.3KO	189.408
atrem1.3KO	59.2675
atrem1.3KO	88.6444
atrem1.3KO	20.3943
atrem1.3KO	47.2818
atrem1.3KO	55.8506
atrem1.3KO	128.173
atrem1.3KO	149.221
atrem1.3KO	26.6424
atrem1.3KO	44.5431
atrem1.3KO	78.0807
atrem1.3KO	41.2132
atrem1.3KO	152.911
atrem1.3KO	149.137
atrem1.3KO	90.5783
atrem1.3KO	67.122
atrem1.3KO	73.9396
atrem1.3KO	52.5388
atrem1.3KO	101.004
atrem1.3KO	69.3304
atrem1.3KO	42.6562
atrem1.3KO	42.9677
atrem1.3KO	33.3218
atrem1.3KO	84.7922
atrem1.3KO	70.6145
atrem1.3KO	81.143
atrem1.3KO	118.097
atrem1.3KO	147.209
atrem1.3KO	40.4844
atrem1.3KO	99.5316
atrem1.3KO	82.0566
atrem1.3KO	159.685
atrem1.3KO	334.65
atrem1.3KO	17.1375
atrem1.3KO	75.5935
atrem1.3KO	23.1922
atrem1.3KO	85.9918
atrem1.3KO	296.199
atrem1.3KO	110.714
atrem1.3KO	185.744
atrem1.3KO	105.358
atrem1.3KO	72.4286
atrem1.3KO	52.5686
atrem1.3KO	183.06
atrem1.3KO	126.671
atrem1.3KO	223.404
atrem1.3KO	106.442
atrem1.3KO
atrem1.3KO
atrem1.3KO	77.3449
atrem1.3KO	81.2693
atrem1.3KO	77.4365
atrem1.3KO	90.2248
atrem1.3KO	341.582
atrem1.3KO	47.5584
atrem1.3KO	46.3577
atrem1.3KO	295.917
atrem1.3KO	67.6376
atrem1.3KO	227.049
atrem1.3KO	138.572
atrem1.3KO	254.767
atrem1.3KO	174.921
atrem1.3KO	78.8135
atrem1.3KO	76.4458
atrem1.3KO	214.301
atrem1.3KO	768.638
atrem1.3KO	262.849
atrem1.3KO
atrem1.3KO	148.463
atrem1.3KO	199.546
atrem1.3KO	356.828
atrem1.3KO	135.059
atrem1.3KO	51.216
atrem1.3KO	65.0066
atrem1.3KO	31.4256
atrem1.3KO	105.409
atrem1.3KO	207.228
atrem1.3KO	33.5102
atrem1.3KO
atrem1.3KO	146.867
atrem1.3KO	56.8248
atrem1.3KO	113.933
atrem1.3KO	112.905
atrem1.3KO
atrem1.3KO	47.6902
atrem1.3KO	196.657
atrem1.3KO	161.572
atrem1.3KO	179.152
atrem1.3KO	113.156
atrem1.3KO	50.5935
atrem1.3KO	79.5274
atrem1.3KO	71.5374
atrem1.3KO	80.183
atrem1.3KO	83.4032
atrem1.3KO	85.9155
atrem1.3KO	28.0269
atrem1.3KO	73.8581
atrem1.3KO	85.0042
atrem1.3KO
atrem1.3KO	108.894
atrem1.3KO	252.3
atrem1.3KO	270.617
atrem1.3KO	71.1597
atrem1.3KO	73.8084
atrem1.3KO	175.488
atrem1.3KO	107.604
atrem1.3KO	49.5903
atrem1.3KO	46.4049
atrem1.3KO	109.936
atrem1.3KO	37.7267
atrem1.3KO	160.038
atrem1.3KO	111.626
atrem1.3KO	120.483
atrem1.3KO	91.4306
atrem1.3KO	97.243
atrem1.3KO	63.7126
atrem1.3KO	225.634
atrem1.3KO	35.0451
atrem1.3KO	34.6163
atrem1.3KO	49.4886
atrem1.3KO	38.0374
atrem1.3KO	171.584
atrem1.3KO	344.373
atrem1.3KO	137.502
atrem1.3KO	315.758
atrem1.3KO
atrem1.3KO	193.975
atrem1.3KO	120.708
atrem1.3KO	64.6257
atrem1.3KO	106.635
atrem1.3KO	62.929
atrem1.3KO	36.4349
atrem1.3KO	21.8274
atrem1.3KO	68.0279
atrem1.3KO	77.2425
atrem1.3KO	32.3908
atrem1.3KO	120.378
atrem1.3KO	210.043
atrem1.3KO	170.507
atrem1.3KO	82.7717
atrem1.3KO	68.8177
atrem1.3KO	217.238
atrem1.3KO	130.234
atrem1.3KO	43.8702
atrem1.3KO	22.8888
atrem1.3KO	71.6398
atrem1.3KO	140.342
atrem1.3KO	43.9499
atrem1.3KO	72.5837
atrem1.3KO	16.0583
atrem1.3KO	260.524
atrem1.3KO	39.1668
atrem1.3KO	49.5908
atrem1.3KO	27.7793
atrem1.3KO	123.602
atrem1.3KO	79.4077
atrem1.3KO	88.3181
atrem1.3KO	18.3026
atrem1.3KO	111.899
atrem1.3KO	188.126
atrem1.3KO	82.3095
atrem1.3KO	20.6998
atrem1.3KO	374.952
atrem1.3KO	145.006
atrem1.3KO	363.462
atrem1.3KO	84.7751
atrem1.3KO	47.2017
atrem1.3KO	129.411
atrem1.3KO	32.4961
atrem1.3KO	183.716
atrem1.3KO	23.6781
atrem1.3KO	65.1484
atrem1.3KO	67.2142
atrem1.3KO	36.9001
atrem1.3KO	231.264
atrem1.3KO	49.2966
atrem1.3KO	99.0513
atrem1.3KO	86.5946
atrem1.3KO	143.878
atrem1.3KO	133.614
atrem1.3KO
atrem1.3KO	161.509
atrem1.3KO	16.449
atrem1.3KO	48.8242
atrem1.3KO	78.1679
atrem1.3KO	150.396
atrem1.3KO	193.864
atrem1.3KO	208.105
atrem1.3KO	151.586
atrem1.3KO	31.2374
atrem1.3KO	70.0015
atrem1.3KO	82.5952
atrem1.3KO	32.8764
atrem1.3KO	30.6778
atrem1.3KO	138.678
atrem1.3KO	29.9275
atrem1.3KO	114.642
atrem1.3KO	49.293
atrem1.3KO	74.5158
atrem1.3KO	52.8389
atrem1.3KO	50.601
atrem1.3KO	132.798
atrem1.3KO	139.348
atrem1.3KO	51.3208
atrem1.3KO	121.068
atrem1.3KO	105.658
atrem1.3KO	103.073
atrem1.3KO	76.0693
atrem1.3KO
atrem1.3KO	162.074
atrem1.3KO	102.418
atrem1.3KO	70.5766
atrem1.3KO	83.5828
atrem1.3KO	105.656
atrem1.3KO
atrem1.3KO	25.3066
atrem1.3KO	29.1065
atrem1.3KO	116.445
atrem1.3KO	34.0912
atrem1.3KO	118.736
atrem1.3KO	245.823
atrem1.3KO	90.9547
atrem1.3KO	94.3928
atrem1.3KO	71.3626
atrem1.3KO	75.6297
atrem1.3KO	74.485
atrem1.3KO	101.008
atrem1.3KO	140.663
atrem1.3KO	98.9902
atrem1.3KO	52.0129
atrem1.3KO	151.518
atrem1.3KO
atrem1.3KO	70.7482
atrem1.3KO	128.593
atrem1.3KO	134.894
atrem1.3KO	185.713
atrem1.3KO	111.675
atrem1.3KO	233.848
atrem1.3KO
atrem1.3KO	236.373
atrem1.3KO	48.8577
atrem1.3KO	74.8779
atrem1.3KO	189.236
atrem1.3KO	97.7515
atrem1.3KO	57.0804
atrem1.3KO	127.303
atrem1.3KO	113.077
atrem1.3KO	93.3584
atrem1.3KO	62.8768
atrem1.3KO	44.4991
atrem1.3KO	109.983
atrem1.3KO	68.5169
atrem1.4KO	66.9378
atrem1.4KO	53.0211
atrem1.4KO	112.578
atrem1.4KO	44.5773
atrem1.4KO	50.0976
atrem1.4KO	82.0403
atrem1.4KO	70.418
atrem1.4KO	21.6899
atrem1.4KO	89.9595
atrem1.4KO	77.0181
atrem1.4KO	64.4963
atrem1.4KO	250.401
atrem1.4KO	34.9868
atrem1.4KO	70.0808
atrem1.4KO	93.5116
atrem1.4KO	125.556
atrem1.4KO	38.4333
atrem1.4KO	90.0054
atrem1.4KO	118.879
atrem1.4KO	54.9987
atrem1.4KO	86.8071
atrem1.4KO	68.6782
atrem1.4KO
atrem1.4KO	69.6523
atrem1.4KO	38.2293
atrem1.4KO	152.059
atrem1.4KO	47.9055
atrem1.4KO	38.5549
atrem1.4KO	31.7288
atrem1.4KO	117.933
atrem1.4KO	58.3181
atrem1.4KO	27.2445
atrem1.4KO	73.6573
atrem1.4KO	86.7225
atrem1.4KO	173.56
atrem1.4KO	185.867
atrem1.4KO	56.2261
atrem1.4KO	210.076
atrem1.4KO	127.91
atrem1.4KO	69.8502
atrem1.4KO	384.062
atrem1.4KO	186.658
atrem 3KO	242.452
atrem 3KO	286.925
atrem 3KO	143.62
atrem 3KO	160.078
atrem 3KO	225.813
atrem 3KO	184.756
atrem 3KO	348.957
atrem 3KO	24.5577
atrem 3KO	89.1239
atrem 3KO	79.6848
atrem 3KO	121.051
atrem 3KO	210.772
atrem 3KO	267.135
atrem 3KO	60.4508
atrem 3KO	55.5781
atrem 3KO	38.4883
atrem 3KO	324.184
atrem 3KO	483.536
atrem 3KO	539.108
atrem 3KO	199.021
atrem 3KO
atrem 3KO	182.546
atrem 3KO	147.817
atrem 3KO	298.019
atrem 3KO	137.059
atrem 3KO	257.416
atrem 3KO	92.6483
atrem 3KO	44.1115
atrem 3KO	107.223
atrem 3KO	55.8257
atrem 3KO	135.854
atrem 3KO	289.58
atrem 3KO	191.824
atrem 3KO
atrem 3KO	95.3142
atrem 3KO	96.2445
atrem 3KO	131.894
atrem 3KO	99.8361
atrem 3KO	53.5317
atrem 3KO	171.968
atrem 3KO	171.031
atrem 3KO	36.484
atrem 3KO	212.472
atrem 3KO	126.964
atrem 3KO	48.1211
atrem 3KO	238.188
atrem 3KO	263.013
atrem 3KO	163.81
atrem 3KO	169.534
atrem 3KO	115.66
atrem 3KO	332.926
atrem 3KO	100.529
atrem 3KO	91.2372
atrem 3KO	182.468
atrem 3KO	290.934
atrem 3KO	487.91
atrem 3KO	116.492
atrem 3KO	91.5903
atrem 3KO	190.256
atrem 3KO	165.072
atrem 3KO	149.928
atrem 3KO	197.812
atrem 3KO	143.586
atrem 3KO	149.477
atrem 3KO	51.6146
atrem 3KO	107.707
atrem 3KO	50.5331
atrem 3KO	101.226
atrem 3KO	273.215
atrem 3KO	227.494
atrem 3KO	200.87
atrem 3KO	125.561
atrem 3KO	98.941
atrem 3KO	75.0585
atrem 3KO	105.274
atrem 3KO	325.039
atrem 3KO	157.5
atrem 3KO	239.236
atrem 3KO	97.6334
atrem 3KO	153.741
atrem 3KO	111.718
atrem 3KO	81.907
atrem 3KO	195.501
atrem 3KO	52.1097
atrem 3KO	157.468
atrem 3KO	245.31
atrem 3KO	241.751
atrem 3KO	219.869
atrem 3KO	69.6419
atrem 3KO	338.339
atrem 3KO	95.6081
atrem 3KO	307.542
atrem 3KO	136.735
atrem 3KO	178.266
atrem 3KO	168.16
atrem 3KO	46.1736
atrem 3KO	108.039
atrem 3KO	255.659
atrem 3KO	304.463
atrem 3KO	61.0419
atrem 3KO	108.656
atrem 3KO	50.547
atrem 3KO	114.889
atrem 3KO	238.872
atrem 3KO	114.48
atrem 3KO	109.995
atrem 3KO	328.374
atrem 3KO	172.506
atrem 3KO	220.212
atrem 3KO	70.2479
atrem 3KO	92.5897
atrem 3KO	283.947
atrem 3KO	138.698
atrem 3KO	111.405
atrem 3KO	111.504
atrem 3KO	82.0442
atrem 3KO	110.394
atrem 3KO	120.513
atrem 3KO	117.391
atrem 3KO	73.7166
atrem 3KO	141.96
atrem 3KO	508.722
atrem 3KO	88.3371
atrem 3KO	385.773
atrem 3KO	204.081
atrem 3KO	48.6189
atrem 3KO	50.9819
atrem 3KO	96.6583
atrem 3KO	70.9446
atrem 3KO	141.776
atrem 3KO	38.671
atrem 3KO	53.8819
atrem 3KO	39.5088
atrem 3KO	202.356
atrem 3KO	72.9523
atrem 3KO	61.0364
atrem 3KO	188.529
atrem 3KO	249.925
atrem 3KO	133.09
atrem 3KO	122.525
atrem 3KO	182.642
atrem 3KO	171.658
atrem 3KO	123.274
atrem 3KO	51.3254
atrem 3KO	119.729
atrem 3KO	32.12
atrem 3KO	25.9785
atrem 3KO	37.9904
atrem 3KO	136.933
atrem 3KO	88.6963
atrem 3KO	103.439
atrem 3KO	135.47
atrem 3KO	54.2507
atrem 3KO	97.2674
atrem 3KO	102.329
atrem 3KO	75.7733
atrem 3KO	180.368
atrem 3KO	262.681
atrem 3KO
atrem 3KO	168.622
atrem 3KO	115.438
atrem 3KO	658.827
atrem 3KO	366.685
atrem 3KO	438.875
atrem 3KO	326.092
atrem 3KO	140.201
atrem 3KO	145.799
atrem 3KO	197.688
atrem 3KO	145.521
atrem 3KO	315.193
atrem 3KO	130.305
atrem 3KO	158.867
atrem 3KO	204.222
atrem 3KO	153.397
atrem 3KO	47.7778
atrem 3KO	352.842
atrem 3KO	186.384
atrem 3KO	90.4423
atrem 3KO	555.632
atrem 3KO	200.586
atrem 3KO	51.1481
atrem 3KO	54.7015
atrem 3KO	51.0111
atrem 3KO	202.394
atrem 3KO	60.8847
atrem 3KO	73.4117
atrem 3KO	45.4692
atrem 3KO	129.351
atrem 3KO	188.003
atrem 3KO	239.367
atrem 3KO	120.617
