# Supplementary figures and images for: Interdependence of plasma membrane nanoscale dynamics of a kinase and its cognate substrate underlies Arabidopsis response to viral infection
Source: eLife journal article supplement (doi:10.7554/elife.90309), 2023-09-14

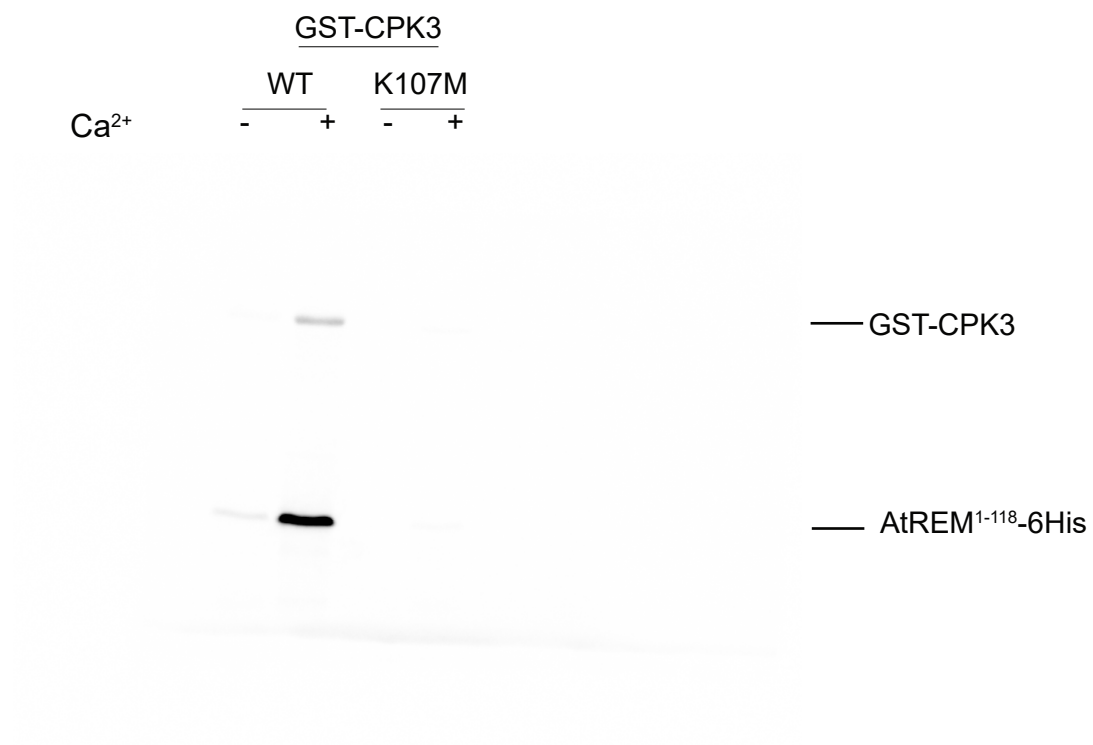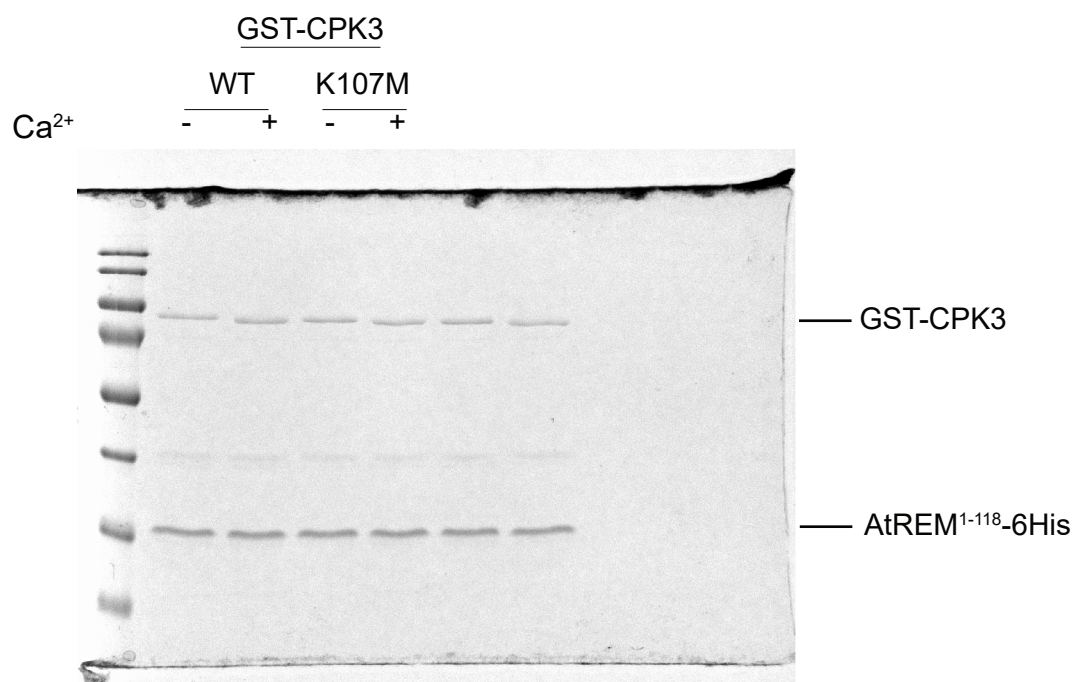

Supplement: fig1-data2 [file elife-90309-fig1-data2-v1.zip]

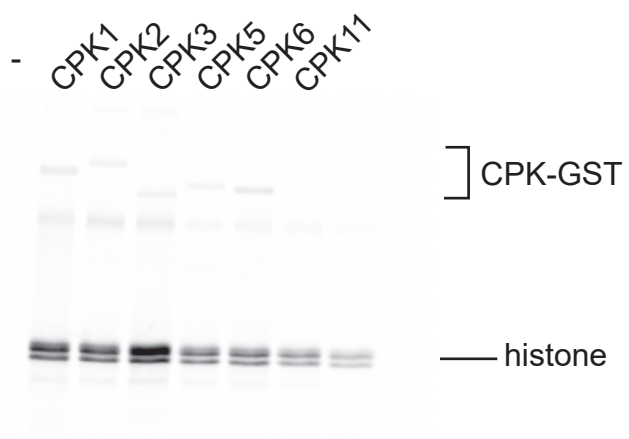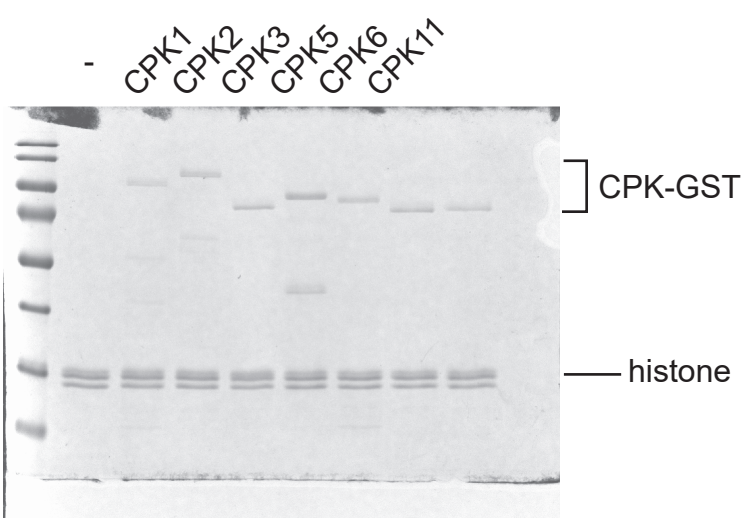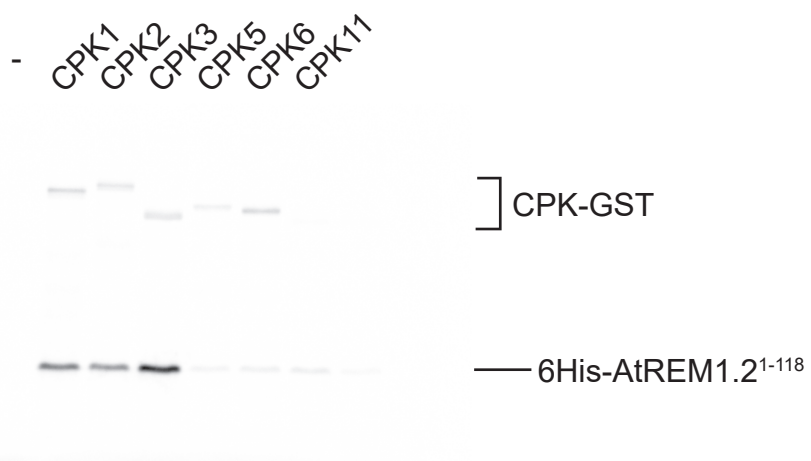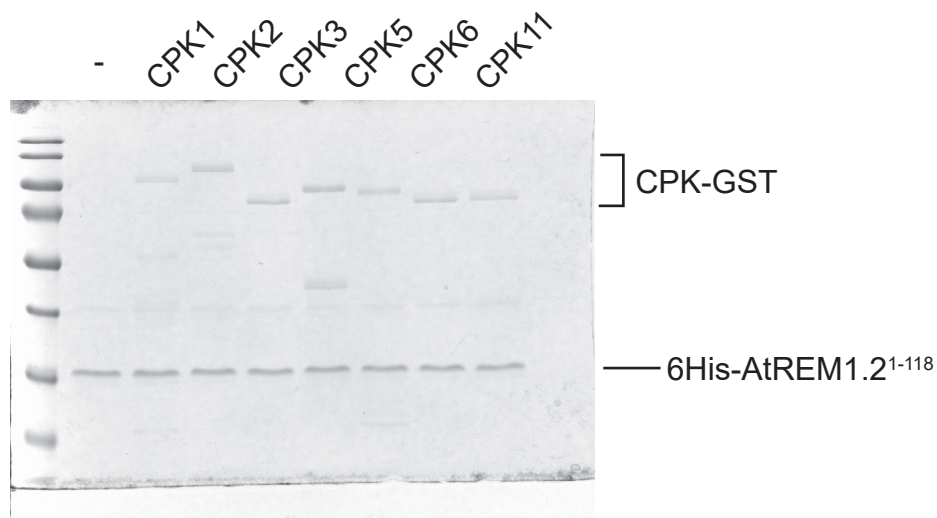

Supplement: fig1-figsupp2-data2 [file elife-90309-fig1-figsupp2-data2-v1.zip]

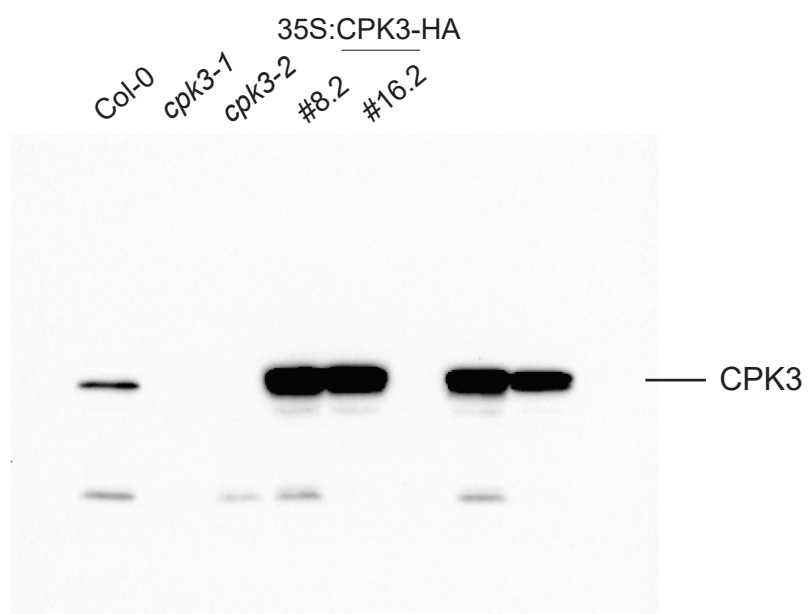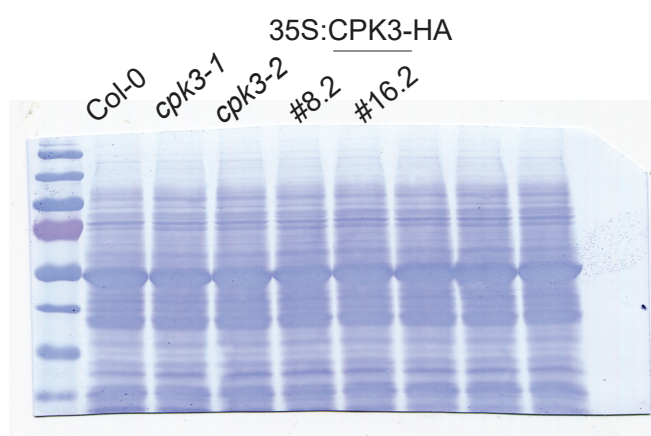

Supplement: fig1-figsupp3-data2 [file elife-90309-fig1-figsupp3-data2-v1.zip]

|            |    |   |    |   |    |   |
|------------|----|---|----|---|----|---|
| Replicates | #1 |   | #2 |   | #3 |   |
| PIAMV      | -  | + | -  | + | -  | + |

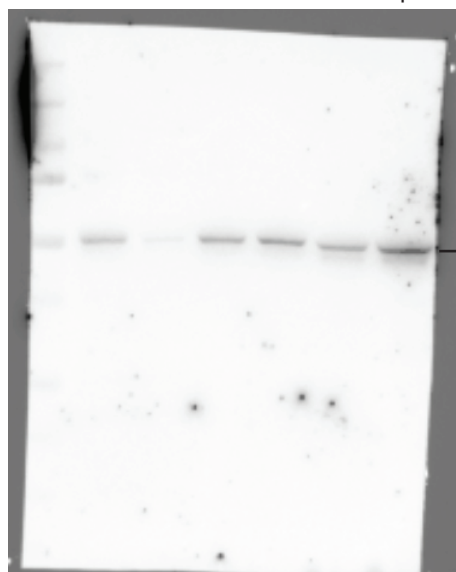

CPK3

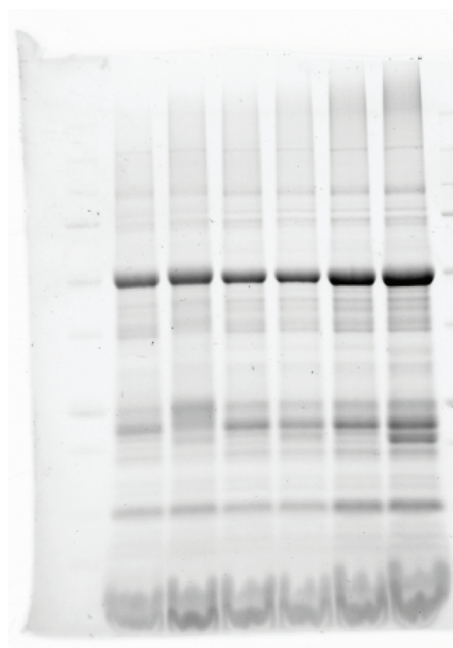

Stain free gel

Supplement: fig2-figsupp1-data3 [file elife-90309-fig2-figsupp1-data3-v1.zip]

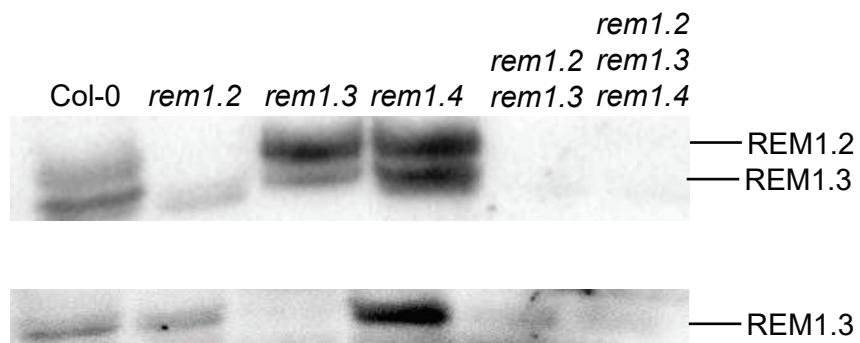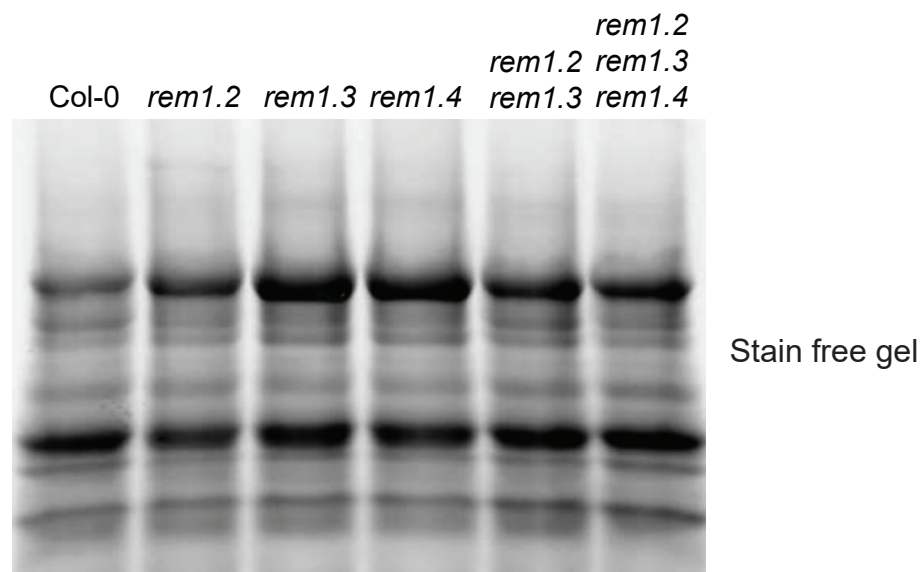

Source data Figure 4 supplemental figure 1 - uncut gel and membrane.

Supplement: fig4-figsupp1-data2 [file elife-90309-fig4-figsupp1-data2-v1.zip]

|            |    |   |    |   |    |   |
|------------|----|---|----|---|----|---|
| Replicates | #1 |   | #2 |   | #3 |   |
| PIAMV      | -  | + | -  | + | -  | + |

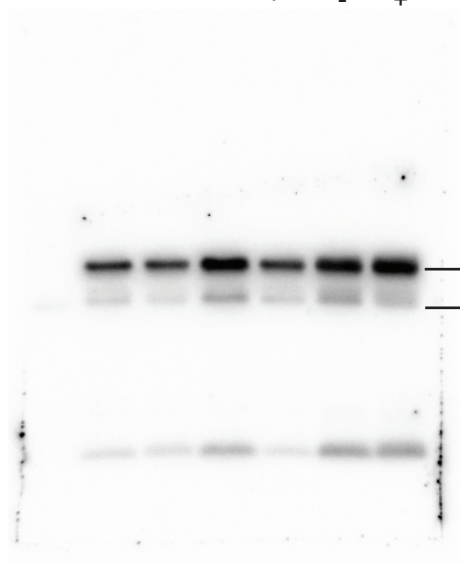

REM1.2  
REM1.3

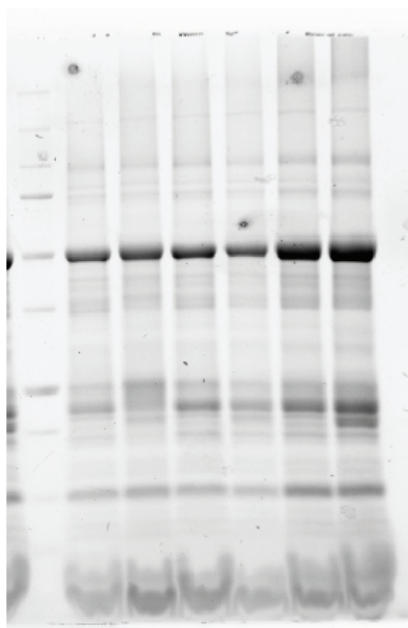

Stain free gel

Supplement: fig4-figsupp3-data3 [file elife-90309-fig4-figsupp3-data3-v1.zip]
